# Supplementary material for: Maternal BMI and infant obesity risk: a lipidomics perspective on the developmental origins of obesity
Source: Research Square preprint supplement (doi:10.21203/rs.3.rs-7089146/v1), 2025-07-23
Supplement: Supplementary file 1 [file 38fd8e8545d2591b5e7cea2e.docx]

**Supplementary Figures and Tables have been provided.**

Manuscript_Supplementary_Figures contains 3 figures:

- Supplementary Figure 1. Infant 6 month lipidome associations with infant 6 month BMI z-score.
- Supplementary Figure 2. Infant 12 month lipidome associations with infant 12 month BMI z-score.
- Supplementary Figure 3. Infant 48 month lipidome associations with infant 48 month BMI z-score.

Manuscript_Supplementary_Tables contains 11 tables:

- S1. Linear regression between maternal pre-pregnancy BMI and maternal 28-week lipidome
- S2. Linear regression between maternal pre-pregnancy BMI and umbilical cord lipidome
- S3. Causal mediation for cord lipids mediating the effect of maternl pre-pregnancy BMI on infant birth weight
- S4. Linear regression between infant BMI and lipidome at 6 months of age
- S5. Linear regression between infant BMI and lipidome at 12 months of age
- S6. Linear regression between infant BMI and lipidome at 48 months of age
- S7. Linear regression between maternal 28-week lipidome and infant 06m lipidome
- S8. Linear regression between maternal 28-week lipidome and infant 12m lipidome
- S9. Linear regression between maternal 28-week lipidome and infant 48m lipidome
- S10. Linear regression to link maternal and infant plasmalogen scores and BMI
- S11. Justification for use of maternal pre-pregnancy BMI compared to maternal weight or weight gain
