# Supplementary material for: Maternal BMI and infant obesity risk: a lipidomics perspective on the developmental origins of obesity
Source: Research Square preprint supplement (doi:10.21203/rs.3.rs-7089146/v1), 2025-07-23
Supplement: Supplementary file 2 [file 669231cde4b50d08e992e35f.xlsx]

## Sheet: Description
List of supplementary tables
Supp 1	Linear regression between maternal pre-pregnancy BMI and maternal 28-week lipidome
Supp 2	Linear regression between maternal pre-pregnancy BMI and umbilical cord lipidome
Supp 3	Causal mediation for cord lipids mediating the effect of maternl pre-pregnancy BMI on infant birth weight
Supp 4	Linear regression between infant BMI and lipidome at 6 months of age
Supp 5	Linear regression between infant BMI and lipidome at 12 months of age
Supp 6	Linear regression between infant BMI and lipidome at 48 months of age
Supp 7	Linear regression between maternal 28-week lipidome and infant 06m lipidome
Supp 8	Linear regression between maternal 28-week lipidome and infant 12m lipidome
Supp 9	Linear regression between maternal 28-week lipidome and infant 48m lipidome
Supp 10	Linear regression to link maternal and infant plasmalogen scores and BMI
Supp 11	Justification for use of maternal pre-pregnancy BMI compared to maternal weight or weight gain

## Sheet: Supp 1
Supp 1. Linear regression between maternal pre-pregnancy BMI and maternal 28-week lipidome
#	Lipid	Beta	LCI	UCI	p value	BH p value
1	Sph(d16:1)	0.0198522	-0.0142932	0.0539976	0.254125	0.350138
2	Sph(d18:1)	-0.000190371	-0.0123776	0.0119968	0.975548	0.990411
3	Sph(d18:2)	-0.00363539	-0.0164949	0.00922413	0.579124	0.67703
4	S1P(d16:1)	0.0152884	0.0029154	0.0276615	0.0155065	0.0329456
5	S1P(d18:0)	0.00919198	-0.0038575	0.0222414	0.167162	0.244083
6	S1P(d18:1)	0.0133917	0.000585341	0.0261981	0.0404299	0.0767749
7	S1P(d18:2)	0.0586694	0.0465494	0.0707894	2.08868e-20	1.09357e-18
8	Cer(d18:0/16:0)	4.52233e-05	-0.01123	0.0113205	0.993721	0.996397
9	Cer(d18:0/18:0)	0.0660587	0.0552365	0.0768809	1.18544e-30	1.73785e-28
10	Cer(d18:0/20:0)	0.0304956	0.0191309	0.0418602	1.76319e-07	1.08606e-06
11	Cer(d18:0/22:0)	0.0195384	0.00850385	0.0305729	0.000536122	0.00151966
12	Cer(d18:0/24:0)	-0.0057948	-0.016874	0.00528444	0.304903	0.409148
13	Cer(d18:0/24:1)	0.0367241	0.0257455	0.0477027	9.05497e-11	1.12496e-09
14	Cer(d16:1/16:0)	0.0183996	0.00625267	0.0305465	0.00303178	0.00779753
15	Cer(d16:1/18:0)	0.0558022	0.0442597	0.0673447	2.32216e-20	1.13476e-18
16	Cer(d16:1/20:0)	0.0234482	0.0117458	0.0351505	9.08516e-05	0.000299974
17	Cer(d16:1/22:0)	-0.00691223	-0.0182984	0.00447391	0.233771	0.324534
18	Cer(d16:1/23:0)	-0.0234231	-0.0348879	-0.0119583	6.60926e-05	0.000228518
19	Cer(d16:1/24:0)	-0.0338508	-0.0452229	-0.0224787	7.34362e-09	6.1169e-08
20	Cer(d16:1/24:1)	0.0159074	0.00451897	0.0272958	0.0062432	0.0146207
21	Cer(d17:1/16:0)	0.00930352	-0.00366873	0.0222758	0.159594	0.234905
22	Cer(d17:1/18:0)	0.0452626	0.0333048	0.0572205	2.67664e-13	5.60565e-12
23	Cer(d17:1/20:0)	0.0229404	0.0110432	0.0348376	0.000164812	0.000511894
24	Cer(d17:1/22:0)	0.00536814	-0.00637461	0.0171109	0.369827	0.476421
25	Cer(d17:1/23:0)	-0.0119838	-0.0238384	-0.000129146	0.0475614	0.0878148
26	Cer(d17:1/24:0)	-0.0239467	-0.0353568	-0.0125367	4.17405e-05	0.000151464
27	Cer(d17:1/24:1)	0.0160402	0.00448036	0.0276	0.00659266	0.0152818
28	Cer(d18:1/14:0)	0.0116936	-0.0007363	0.0241235	0.0651679	0.112927
29	Cer(d18:1/16:0)	0.0090681	-0.00195805	0.0200942	0.106852	0.171754
30	Cer(d18:1/17:0)	-0.00168184	-0.0149145	0.0115508	0.803062	0.860717
31	Cer(d18:1/18:0)	0.0596154	0.0488466	0.0703841	7.90379e-26	6.4372e-24
32	Cer(d18:1/19:0)	0.0327809	0.0206388	0.0449229	1.4872e-07	9.31726e-07
33	Cer(d18:1/20:0)	0.0317086	0.0210566	0.0423605	7.33177e-09	6.1169e-08
34	Cer(d18:1/21:0)	0.0397458	0.0282658	0.0512259	2.04167e-11	2.93439e-10
35	Cer(d18:1/22:0)	0.0170342	0.00635222	0.0277161	0.00180839	0.00476817
36	Cer(d18:1/23:0)	0.000630026	-0.0100343	0.0112943	0.907714	0.942428
37	Cer(d18:1/24:0)	-0.0117317	-0.0225133	-0.000950027	0.0329888	0.0631351
38	Cer(d18:1/24:1)	0.0347605	0.0244989	0.0450222	5.31072e-11	6.71165e-10
39	Cer(d18:1/26:0)	-0.0177192	-0.0298057	-0.00563266	0.00410975	0.0101429
40	Cer(d18:2/14:0)	0.0506597	0.039098	0.0622214	3.84748e-17	1.34295e-15
41	Cer(d18:2/16:0)	0.0465335	0.0343749	0.0586922	1.48723e-13	3.20629e-12
42	Cer(d18:2/17:0)	0.0155807	0.00263776	0.0285236	0.018364	0.0378112
43	Cer(d18:2/18:0)	0.0718162	0.060647	0.0829854	1.44285e-33	1.05761e-30
44	Cer(d18:2/20:0)	0.0468926	0.0355248	0.0582604	1.97426e-15	4.99012e-14
45	Cer(d18:2/21:0)	0.0447393	0.0330881	0.0563905	1.24397e-13	2.76313e-12
46	Cer(d18:2/22:0)	0.0231317	0.0118043	0.034459	6.66002e-05	0.000229192
47	Cer(d18:2/23:0)	0.00823529	-0.00324259	0.0197132	0.159416	0.234905
48	Cer(d18:2/24:0)	-0.00852645	-0.020356	0.00330314	0.157519	0.234202
49	Cer(d18:2/24:1)	0.0387849	0.0278626	0.0497071	6.40731e-12	1.02099e-10
50	Cer(d18:2/26:0)	-0.0121611	-0.0241594	-0.000162749	0.0469792	0.087045
51	Cer(d19:1/16:0)	0.01239	-2.35227e-05	0.0248035	0.0504347	0.0911856
52	Cer(d19:1/18:0)	0.0612705	0.0494395	0.0731015	5.65629e-23	3.76914e-21
53	Cer(d19:1/20:0)	0.0378794	0.0256521	0.0501066	1.81429e-09	1.77317e-08
54	Cer(d19:1/22:0)	0.034975	0.023105	0.0468449	1.03171e-08	8.29417e-08
55	Cer(d19:1/23:0)	0.0205353	0.00842663	0.0326439	0.000910338	0.00248059
56	Cer(d19:1/24:0)	0.0119673	-1.82266e-05	0.0239528	0.0503486	0.0911856
57	Cer(d19:1/24:1)	0.0393159	0.027369	0.0512628	1.77714e-10	2.10104e-09
58	Cer(d19:1/26:0)	-0.00463464	-0.0176374	0.00836812	0.484367	0.594708
59	Cer(d20:1/22:0)	0.0213849	0.00930604	0.0334637	0.000536959	0.00151966
60	Cer(d20:1/23:0)	0.00365202	-0.00836626	0.0156703	0.551045	0.655707
61	Cer(d20:1/24:0)	-0.00509194	-0.0173774	0.00719354	0.416154	0.526859
62	Cer(d20:1/24:1)	0.0396014	0.0280228	0.05118	3.49904e-11	4.66326e-10
63	Cer(d20:1/26:0)	-0.0180743	-0.0309321	-0.00521645	0.005922	0.0140936
64	Cer(m18:0/20:0)	0.0103044	-0.000194496	0.0208033	0.0543878	0.0965284
65	Cer(m18:0/22:0)	0.000513124	-0.0102112	0.0112375	0.925201	0.952866
66	Cer(m18:0/23:0)	-0.0117878	-0.0226032	-0.000972407	0.0327017	0.0627496
67	Cer(m18:0/24:0)	-0.0153039	-0.0262382	-0.00436967	0.00613953	0.0144704
68	Cer(m18:0/24:1)	0.0121113	0.00148093	0.0227417	0.0255983	0.0505757
69	Cer(m18:1/18:0)	0.0361653	0.0259028	0.0464278	9.13291e-12	1.42435e-10
70	Cer(m18:1/20:0)	0.0180213	0.00775215	0.0282904	0.000600416	0.00168623
71	Cer(m18:1/22:0)	-0.00158415	-0.0126355	0.00946725	0.778509	0.839187
72	Cer(m18:1/23:0)	-0.00999522	-0.0210615	0.00107102	0.0766197	0.130005
73	Cer(m18:1/24:0)	-0.0204285	-0.0317892	-0.0090678	0.00043904	0.001272
74	Cer(m18:1/24:1)	0.011084	0.000302803	0.0218652	0.0439171	0.0819115
75	Cer1P(d18:1/16:0)	-0.00735696	-0.0184359	0.00372202	0.192801	0.274948
76	HexCer(d16:1/18:0)	0.0155317	0.00288111	0.0281824	0.0161749	0.0341677
77	HexCer(d16:1/20:0)	-0.00548283	-0.0175965	0.00663087	0.374588	0.481444
78	HexCer(d16:1/22:0)	-0.0261536	-0.0378679	-0.0144392	1.32363e-05	5.30175e-05
79	HexCer(d16:1/24:0)	-0.0420364	-0.0534828	-0.03059	1.26091e-12	2.36987e-11
80	HexCer(d18:1/16:0)	0.00356253	-0.00810909	0.0152342	0.549266	0.65537
81	HexCer(d18:1/18:0)	-0.0174309	-0.0293155	-0.0055464	0.00409303	0.0101358
82	HexCer(d18:1/20:0)	-0.0156994	-0.0271644	-0.00423433	0.00733683	0.0167015
83	HexCer(d18:1/22:0)	-0.0248514	-0.0365526	-0.0131502	3.3814e-05	0.000123312
84	HexCer(d18:1/24:0)	-0.0359459	-0.0474367	-0.0244552	1.26965e-09	1.31078e-08
85	HexCer(d18:1/24:1)	-0.0096748	-0.0212763	0.0019267	0.102042	0.166585
86	HexCer(d18:2/18:0)	0.00926959	-0.00265721	0.0211964	0.127512	0.198022
87	HexCer(d18:2/20:0)	0.0105093	-0.0011442	0.0221628	0.0770773	0.13048
88	HexCer(d18:2/22:0)	-0.0010478	-0.0129499	0.0108543	0.862855	0.912659
89	HexCer(d18:2/24:0)	-0.0214791	-0.0333527	-0.00960541	0.000405645	0.00118783
90	Hex2Cer(d16:1/16:0)	-0.000243286	-0.0119326	0.011446	0.967425	0.983526
91	Hex2Cer(d16:1/24:1)	0.00519189	-0.00645283	0.0168366	0.381757	0.486862
92	Hex2Cer(d18:1/16:0)	0.000104021	-0.0111887	0.0113968	0.985579	0.99429
93	Hex2Cer(d18:1/18:0)	-0.0315504	-0.0431048	-0.019996	1.07769e-07	6.9907e-07
94	Hex2Cer(d18:1/20:0)	0.012673	0.00115085	0.0241952	0.0311451	0.0603952
95	Hex2Cer(d18:1/22:0)	-0.0011293	-0.0121789	0.0099203	0.841059	0.892825
96	Hex2Cer(d18:1/24:0)	-0.014998	-0.0261885	-0.00380759	0.00867838	0.0196335
97	Hex2Cer(d18:1/24:1)	0.010481	-0.00102923	0.0219912	0.0742527	0.126575
98	Hex2Cer(d18:2/16:0)	0.0334793	0.0220199	0.0449388	1.36402e-08	1.05245e-07
99	Hex2Cer(d18:2/24:1)	0.0262982	0.0148405	0.037756	7.57285e-06	3.26523e-05
100	Hex3Cer(d18:1/16:0)	0.00748684	-0.0027723	0.017746	0.152404	0.22986
101	Hex3Cer(d18:1/18:0)	-0.00539194	-0.0168722	0.00608829	0.356863	0.464619
102	Hex3Cer(d18:1/20:0)	0.000364891	-0.011215	0.0119448	0.950698	0.970559
103	Hex3Cer(d18:1/22:0)	-0.00873153	-0.0193554	0.00189236	0.107083	0.171754
104	Hex3Cer(d18:1/24:0)	-0.0239316	-0.0347395	-0.0131237	1.5548e-05	6.12726e-05
105	Hex3Cer(d18:1/24:1)	0.00772094	-0.00296006	0.0184019	0.156318	0.233631
106	GM3(d18:1/16:0)	0.00218904	-0.00864949	0.0130276	0.691896	0.769836
107	GM3(d18:1/18:0)	-0.00736184	-0.0187251	0.00400144	0.203861	0.287366
108	GM3(d18:1/20:0)	-0.00482491	-0.0177527	0.00810294	0.464038	0.575533
109	GM3(d18:1/22:0)	-0.0137774	-0.0258459	-0.00170896	0.0253037	0.050266
110	GM3(d18:1/24:0)	-0.040541	-0.0519453	-0.0291366	6.08657e-12	9.91435e-11
111	GM3(d18:1/24:1)	-0.000966588	-0.0130071	0.0110739	0.874835	0.923997
112	GM1(d18:1/16:0)	-0.013521	-0.0251043	-0.00193773	0.0222018	0.0449557
113	Sulfatide (d18:1:/16:0(OH))	-0.0398781	-0.0506603	-0.029096	8.84295e-13	1.70576e-11
114	Sulfatide (d18:1:/16:0)	-0.0350688	-0.0461542	-0.0239833	8.35275e-10	9.00377e-09
115	Sulfatide (d18:1:/24:0(OH))	-0.0250159	-0.0373571	-0.0126746	7.52969e-05	0.000253177
116	Sulfatide (d18:1:/24:0)	-0.0480609	-0.0591133	-0.0370085	6.4765e-17	1.97803e-15
117	Sulfatide (d18:1:/24:1(OH))	-0.0329509	-0.0448918	-0.0210099	7.94505e-08	5.44273e-07
118	Sulfatide (d18:1:/24:1)	-0.0448412	-0.0558284	-0.0338539	3.79326e-15	9.26819e-14
119	SM(34:3)	0.0669803	0.056234	0.0777266	8.58129e-32	2.6518e-29
120	SM(35:2) (b)	0.0117907	0.00125104	0.0223304	0.0283809	0.0553277
121	SM(37:1)	0.0237943	0.0123168	0.0352717	5.16299e-05	0.000184608
122	SM(37:2)	0.0361407	0.0244842	0.0477973	1.76163e-09	1.74497e-08
123	SM(38:3) (a)	0.0307752	0.0184491	0.0431013	1.14623e-06	5.91682e-06
124	SM(38:3) (b)	0.0359145	0.0236813	0.0481478	1.16316e-08	9.1677e-08
125	SM(40:3) (a)	0.0352887	0.0238541	0.0467233	2.08337e-09	1.98326e-08
126	SM(40:3) (b)	0.0232462	0.0114339	0.0350584	0.000120745	0.00038481
127	SM(41:0)	0.000776582	-0.0106535	0.0122067	0.893945	0.936531
128	SM(41:1) (a)	0.0186304	0.00674218	0.0305186	0.00216622	0.00569118
129	SM(43:1)	-0.00498189	-0.0157745	0.00581075	0.365183	0.473521
130	SM(43:2) (b)	0.0262356	0.0150839	0.0373872	4.48622e-06	2.00512e-05
131	SM(43:2) (c)	-0.00392636	-0.014671	0.00681833	0.473421	0.583223
132	SM(44:1)	-0.0109396	-0.0212023	-0.000677021	0.0367133	0.0700804
133	SM(44:2)	0.0246092	0.0136032	0.0356152	1.28493e-05	5.17503e-05
134	SM(44:3)	0.0157722	0.00464184	0.0269026	0.00553427	0.0133441
135	SM(d16:1/19:0)	0.0155325	0.00378009	0.027285	0.00964863	0.0216283
136	SM(d16:1/23:0)/SM(d17:1/22:0)	-0.0104589	-0.0207799	-0.000137787	0.0470257	0.087045
137	SM(d16:1/24:1)	0.0188004	0.00774951	0.0298512	0.000877102	0.00240792
138	SM(d17:1/14:0)	-0.00313029	-0.0139768	0.00771619	0.571233	0.671858
139	SM(d17:1/16:0)	0.00414525	-0.0063991	0.0146896	0.440556	0.550132
140	SM(d17:1/24:1)	0.0241149	0.0129172	0.0353126	2.62743e-05	9.87645e-05
141	SM(d18:0/14:0)	-0.0103144	-0.0206115	-1.72443e-05	0.0496184	0.0909258
142	SM(d18:0/16:0)	-0.00944738	-0.0210708	0.00217599	0.111013	0.176512
143	SM(d18:0/22:0)	0.0242918	0.0125596	0.036024	5.27556e-05	0.000187718
144	SM(d18:1/14:0/SM(d16:1/16:0)	3.02754e-06	-0.0101643	0.0101703	0.999534	0.999534
145	SM(d18:1/16:0)	0.00676327	-0.00410314	0.0176297	0.222185	0.310213
146	SM(d18:1/17:0)/SM(d17:1/18:0)	0.0245403	0.0128248	0.0362559	4.31757e-05	0.000155901
147	SM(d18:1/18:0/SM(d16:1/20:0)	0.0385679	0.0279549	0.049181	2.12015e-12	3.88518e-11
148	SM(d18:1/20:0)/SM(d16:1/22:0)	0.00162507	-0.00856868	0.0118188	0.754431	0.818043
149	SM(d18:1/22:0)/SM(d16:1/24:0)	0.00320216	-0.00708429	0.0134886	0.541357	0.649982
150	SM(d18:1/23:0)/SM(d17:1/24:0)	-0.0050602	-0.0149572	0.00483681	0.315887	0.420991
151	SM(d18:1/24:0)	-0.0169288	-0.0275116	-0.00634607	0.00174968	0.00463001
152	SM(d18:1/24:1)	0.0334092	0.0227513	0.0440671	1.17668e-09	1.23215e-08
153	SM(d18:2/14:0)	0.0674084	0.0565727	0.0782441	1.09542e-31	2.6518e-29
154	SM(d18:2/16:0)	0.0586716	0.0485211	0.0688221	7.33772e-28	8.96425e-26
155	SM(d18:2/17:0)	0.0445554	0.033512	0.0555988	7.54983e-15	1.72938e-13
156	SM(d18:2/18:0)	0.0644955	0.053271	0.07572	1.42612e-27	1.49335e-25
157	SM(d18:2/18:1)	0.0580031	0.0471366	0.0688696	3.15869e-24	2.31532e-22
158	SM(d18:2/20:0)	0.0408118	0.0291201	0.0525036	1.41158e-11	2.1556e-10
159	SM(d18:2/22:0)	0.0284316	0.017527	0.0393363	3.83603e-07	2.19673e-06
160	SM(d18:2/23:0)	0.0120752	0.00149777	0.0226526	0.0253044	0.050266
161	SM(d18:2/24:0)	-0.00498086	-0.0157815	0.00581981	0.365638	0.473521
162	SM(d19:1/24:1)	0.0375329	0.0254392	0.0496267	1.69998e-09	1.70696e-08
163	PA(34:1)	-0.00886417	-0.0196366	0.00190826	0.106665	0.171754
164	PA(36:1)	-0.0107506	-0.0219463	0.000445105	0.0598076	0.104628
165	PA(36:2)	-0.0259475	-0.0373925	-0.0145025	9.74378e-06	4.05806e-05
166	PA(36:3)	-0.0144599	-0.0262554	-0.00266433	0.016337	0.0343123
167	PA(36:4)	0.00294213	-0.00838694	0.0142712	0.610374	0.704591
168	PA(40:6)	-0.00547806	-0.0174595	0.00650335	0.369756	0.476421
169	PC(14:0_16:0)	-0.0250713	-0.035939	-0.0142036	6.81062e-06	2.97154e-05
170	PC(14:0_20:4)	-0.000503526	-0.0112677	0.0102607	0.926867	0.952866
171	PC(14:0_22:6)	-0.0310821	-0.0419679	-0.0201962	2.83363e-08	2.03632e-07
172	PC(15-MHDA_18:1)	0.00242641	-0.00955622	0.014409	0.691135	0.769836
173	PC(15-MHDA_18:2)	-0.00952738	-0.0219041	0.0028493	0.131184	0.202012
174	PC(15-MHDA_20:4)	0.0292295	0.0172352	0.0412239	2.03651e-06	9.95176e-06
175	PC(15-MHDA_22:6)	-0.00927512	-0.021432	0.00288178	0.134636	0.20646
176	PC(15:0_20:3)	-9.60888e-05	-0.0121377	0.0119456	0.987507	0.99429
177	PC(15:0_20:4)	0.0169664	0.0052916	0.0286412	0.00444508	0.0108608
178	PC(15:0_22:6)	-0.0278234	-0.0389268	-0.01672	1.04912e-06	5.49289e-06
179	PC(16:0_16:0)	-0.00210543	-0.0123785	0.00816764	0.687591	0.769472
180	PC(16:0_18:0)	-0.00701979	-0.0167807	0.00274107	0.15844	0.234252
181	PC(16:0_18:1)	0.00638618	-0.00477254	0.0175449	0.261626	0.357783
182	PC(16:0_18:2)	-0.00352127	-0.0157032	0.0086607	0.570625	0.671858
183	PC(16:0_18:3) (a)	-0.0238404	-0.0347759	-0.0129049	2.09241e-05	8.07231e-05
184	PC(16:0_18:3) (b)	-0.0101053	-0.0208996	0.000688985	0.0664878	0.114672
185	PC(16:0_20:3) (a)	0.0131423	0.00236947	0.023915	0.0168608	0.0351731
186	PC(16:0_20:3) (b)	0.00533551	-0.00574924	0.0164203	0.345051	0.45408
187	PC(16:0_20:4)	0.04026	0.0278111	0.0527089	3.56879e-10	4.08738e-09
188	PC(16:0_20:5)	0.00210811	-0.009576	0.0137922	0.723325	0.796092
189	PC(16:0_22:6)	-0.0118314	-0.0236662	3.4361e-06	0.0500664	0.0911856
190	PC(16:1_18:2)	0.000574118	-0.0104897	0.0116379	0.918898	0.950826
191	PC(16:1_20:4)	0.0239353	0.0132852	0.0345853	1.16117e-05	4.72854e-05
192	PC(16:1_22:6)	-0.00896253	-0.0203687	0.00244368	0.123382	0.194493
193	PC(17:0_18:1)	0.000855514	-0.0100638	0.0117748	0.877819	0.925815
194	PC(17:0_18:2)	-0.0166652	-0.0286994	-0.00463112	0.00670019	0.0153476
195	PC(17:0_20:4)	0.030545	0.018519	0.042571	7.51223e-07	4.04887e-06
196	PC(17:0_22:6)	-0.0163902	-0.0283324	-0.00444805	0.00720362	0.0164494
197	PC(17:1_18:2)	-0.0157692	-0.0275904	-0.00394798	0.00899555	0.0202884
198	PC(18:0_18:1)	-0.00178427	-0.012709	0.00914043	0.748615	0.814147
199	PC(18:0_18:2)	-0.0125554	-0.0239792	-0.00113157	0.0312718	0.0604809
200	PC(18:0_20:3)	0.0340981	0.0230864	0.0451097	1.84428e-09	1.77876e-08
201	PC(18:0_20:4)	0.0569508	0.0452161	0.0686854	1.6877e-20	9.51601e-19
202	PC(18:0_22:4)	0.0142973	0.00275171	0.0258429	0.0152824	0.032564
203	PC(18:0_22:5) (n3)	-0.00498532	-0.0166144	0.00664379	0.400344	0.509466
204	PC(18:0_22:5) (n6)	0.00191406	-0.0102062	0.0140343	0.756661	0.818043
205	PC(18:0_22:6)	0.00355526	-0.00899841	0.0161089	0.578448	0.67703
206	PC(18:1_18:1)	-0.0150634	-0.0267978	-0.003329	0.0119323	0.0261085
207	PC(18:1_18:2)	-0.0295969	-0.0412291	-0.0179647	7.18779e-07	3.96139e-06
208	PC(18:1_20:3)	0.0130003	0.00145032	0.0245502	0.0274257	0.0537514
209	PC(18:1_22:6) (a)	-0.0345905	-0.0466807	-0.0225003	2.6607e-08	1.9503e-07
210	PC(18:1_22:6) (b)	-0.0120674	-0.024559	0.000424202	0.0582848	0.102208
211	PC(18:2_18:2)	-0.0437886	-0.0545651	-0.0330121	4.94177e-15	1.16849e-13
212	PC(18:2_20:5)	-0.0242076	-0.0350936	-0.0133217	1.4309e-05	5.66944e-05
213	PC(20:0_20:4)	0.00888509	-0.00263377	0.0204039	0.130402	0.20123
214	PC(28:0)	-0.0333657	-0.0449353	-0.0217961	2.06953e-08	1.54792e-07
215	PC(31:0) (a)	-0.0245353	-0.0366789	-0.0123917	7.94081e-05	0.000264573
216	PC(31:0) (b)	-0.0181276	-0.0301575	-0.0060978	0.0031861	0.00816577
217	PC(32:1)	0.00192149	-0.00914282	0.0129858	0.733288	0.804722
218	PC(32:2)	-0.0248459	-0.0353689	-0.014323	4.14719e-06	1.90718e-05
219	PC(33:0) (a)	0.000719811	-0.0108244	0.0122641	0.902624	0.939806
220	PC(33:0) (b)	-0.00468264	-0.0161092	0.0067439	0.421418	0.530754
221	PC(33:1)	-0.00774892	-0.0188694	0.00337152	0.17177	0.248469
222	PC(33:2)	-0.0238771	-0.0350991	-0.0126551	3.27273e-05	0.000120548
223	PC(34:5)	-0.0145549	-0.0257849	-0.00332498	0.011139	0.0245191
224	PC(35:5)	-0.00771516	-0.0193165	0.00388622	0.192149	0.274553
225	PC(36:6) (a)	0.00257014	-0.00900976	0.01415	0.663211	0.751366
226	PC(38:2)	-0.0129129	-0.0240948	-0.00173091	0.0236667	0.0476585
227	PC(38:4) (b)	0.00633693	-0.00494093	0.0176148	0.270398	0.367783
228	PC(38:5) (a)	0.0186903	0.00672102	0.0306596	0.00224662	0.00588132
229	PC(38:5) (b)	-0.00181492	-0.0132656	0.00963574	0.755801	0.818043
230	PC(38:6) (a)	-0.00471846	-0.0146451	0.00520819	0.3511	0.458745
231	PC(38:7)(c)	-0.00978964	-0.021106	0.00152671	0.0898805	0.149733
232	PC(39:5)(a)	-0.0237667	-0.0354339	-0.0120995	6.94026e-05	0.000235519
233	PC(39:5)(b)	-0.00553107	-0.0170548	0.00599267	0.346421	0.455066
234	PC(40:10)	0.0102648	-0.00291469	0.0234442	0.126713	0.197198
235	PC(40:7) (a)	0.00128469	-0.00904156	0.0116109	0.807143	0.863701
236	PC(40:8)	-0.0230352	-0.0330771	-0.0129933	7.66371e-06	3.28509e-05
237	PC(44:12)	-0.0304441	-0.0417847	-0.0191034	1.74248e-07	1.0824e-06
238	PC(O-16:0/16:0)	0.00741833	-0.00377879	0.0186155	0.193824	0.275335
239	PC(O-16:0/20:3)	-0.00474987	-0.017207	0.00770726	0.454425	0.566485
240	PC(O-16:0/20:4)	0.0252105	0.0139831	0.0364378	1.18182e-05	4.78603e-05
241	PC(O-16:0/22:6)	0.0103455	-0.00165722	0.0223482	0.0910574	0.151349
242	PC(O-18:0/18:1)	-0.015829	-0.0272009	-0.004457	0.00642584	0.0150005
243	PC(O-18:0/18:2)	-0.0325154	-0.0445115	-0.0205192	1.33028e-07	8.47911e-07
244	PC(O-18:0/20:4)	0.00935011	-0.00244105	0.0211413	0.119979	0.189945
245	PC(O-18:0/22:6)	3.74632e-05	-0.0117821	0.011857	0.995038	0.996397
246	PC(O-18:1/18:1)	0.000545402	-0.0110136	0.0121044	0.926234	0.952866
247	PC(O-18:1/18:2)	-0.0239279	-0.0362096	-0.0116461	0.000140994	0.000445468
248	PC(O-32:1)	-0.0157402	-0.0277799	-0.00370038	0.0104586	0.0232308
249	PC(O-32:2)	-0.0335506	-0.0450732	-0.0220279	1.52187e-08	1.16201e-07
250	PC(O-34:1)	-0.00204162	-0.0140057	0.00992247	0.737754	0.804722
251	PC(O-34:2)	-0.0391041	-0.0509061	-0.0273021	1.34522e-10	1.61647e-09
252	PC(O-34:4)	-0.0084381	-0.0201731	0.00329692	0.158512	0.234252
253	PC(O-35:4)	0.000802142	-0.0113003	0.0129045	0.896524	0.93725
254	PC(O-36:0)	-0.00876952	-0.0203193	0.00278031	0.13652	0.208913
255	PC(O-36:5)	-0.0143669	-0.0263306	-0.00240327	0.0186478	0.0382881
256	PC(O-38:5)	0.0360996	0.0240277	0.0481715	6.28369e-09	5.35575e-08
257	PC(O-40:5)	0.0154006	0.00363814	0.027163	0.0103444	0.023047
258	PC(O-40:7) (a)	0.0247974	0.0128004	0.0367943	5.4323e-05	0.000192243
259	PC(O-40:7) (b)	0.0059385	-0.00735222	0.0192292	0.380735	0.486862
260	PC(P-15:0/20:4) (a)	0.00713555	-0.00528273	0.0195538	0.259718	0.356505
261	PC(P-15:0/20:4) (b)	0.00232435	-0.0101001	0.0147488	0.713564	0.78653
262	PC(P-16:0/14:0)	-0.00235353	-0.0133614	0.0086543	0.674846	0.75985
263	PC(P-16:0/16:0)	0.0115435	0.000418108	0.022669	0.0420076	0.0793598
264	PC(P-16:0/16:1)	0.0264158	0.0153609	0.0374707	3.18525e-06	1.5161e-05
265	PC(P-16:0/18:0)	-0.00395287	-0.0146952	0.00678947	0.470342	0.581384
266	PC(P-16:0/18:1)	0.00675067	-0.00348397	0.0169853	0.195801	0.277606
267	PC(P-16:0/18:2)	-0.0202553	-0.0306779	-0.00983284	0.000146417	0.000460616
268	PC(P-16:0/18:3)	-0.027624	-0.039216	-0.016032	3.38414e-06	1.60037e-05
269	PC(P-16:0/20:4)	0.0338235	0.0226919	0.0449551	3.62154e-09	3.2373e-08
270	PC(P-16:0/20:5)	-0.00316214	-0.0152103	0.00888604	0.606585	0.703523
271	PC(P-16:0/22:6)	0.0102204	-0.00112575	0.0215666	0.0774163	0.130751
272	PC(P-17:0/20:4) (a)	0.0254051	0.013714	0.0370962	2.2236e-05	8.52228e-05
273	PC(P-17:0/20:4) (b)	0.0182539	0.0063501	0.0301577	0.00269186	0.00702183
274	PC(P-18:0/18:2)	-0.0297738	-0.0406048	-0.0189428	8.88183e-08	6.02813e-07
275	PC(P-18:0/20:4)	0.0244301	0.0131711	0.0356891	2.28568e-05	8.6481e-05
276	PC(P-18:0/22:5)	0.0116068	0.000443783	0.0227698	0.0415806	0.078756
277	PC(P-18:0/22:6)	0.00518744	-0.00630029	0.0166752	0.375697	0.481444
278	PC(P-18:1/18:1)	0.009299	-0.00155806	0.0201561	0.093112	0.153719
279	PC(P-18:1/22:6)	0.0240327	0.0123835	0.0356819	5.61132e-05	0.000195862
280	PC(P-20:0/20:4)	0.021442	0.0097375	0.0331465	0.000342333	0.00101181
281	PC(P-35:2)(a)	-0.0240312	-0.0358785	-0.012184	7.44368e-05	0.000251439
282	PC(P-35:2)(b)	-0.0258116	-0.0375345	-0.0140887	1.73339e-05	6.79451e-05
283	PC(P-36:3)	0.0157301	0.00386634	0.0275939	0.00941888	0.021178
284	PC(P-38:5) (a)	0.053947	0.043149	0.064745	1.43592e-21	8.77107e-20
285	PC(P-38:5) (b)	0.0116734	0.000320471	0.0230263	0.043888	0.0819115
286	LPC(14:0) [sn1]	0.00380701	-0.00843585	0.0160499	0.5418	0.649982
287	LPC(14:0) [sn2]	0.00247419	-0.00978547	0.0147338	0.692117	0.769836
288	LPC(15-MHDA) [sn1] [104_sn1]	0.0102812	-0.00220134	0.0227637	0.10633	0.171754
289	LPC(15-MHDA) [sn1] / LPC(17:0) [sn2]	0.00672963	-0.00565467	0.0191139	0.286468	0.386726
290	LPC(15-MHDA) [sn2]	0.00386096	-0.00853962	0.0162615	0.541285	0.649982
291	LPC(15:0) [sn1]	0.00234195	-0.00996715	0.0146511	0.708913	0.78376
292	LPC(15:0) [sn2]	0.00054765	-0.011731	0.0128263	0.93026	0.954647
293	LPC(16:0) [sn1]	0.0115684	-0.000501755	0.0236385	0.0602906	0.105221
294	LPC(16:0) [sn2]	0.0118583	-0.000198029	0.0239145	0.0538747	0.0958499
295	LPC(16:1) [sn1]	0.0328211	0.0208185	0.0448236	1.03427e-07	6.82989e-07
296	LPC(16:1) [sn2]	0.0283565	0.0164993	0.0402138	3.12651e-06	1.50772e-05
297	LPC(17:0) [sn1]	0.00424928	-0.00805504	0.0165536	0.498056	0.609474
298	LPC(17:1) (a) [sn1] [104_sn1]	0.0119295	-0.000198406	0.0240574	0.0538587	0.0958499
299	LPC(17:1) [sn1] (a) / LPC(17:1) [sn2] (b)	0.0083643	-0.00364181	0.0203704	0.17186	0.248469
300	LPC(17:1) [sn1] (b)	-0.0113727	-0.0234523	0.000706872	0.0649634	0.112839
301	LPC(17:1) [sn2] (a)	0.0102576	-0.00169199	0.0222072	0.0923847	0.152862
302	LPC(18:0) [sn1]	0.00857216	-0.0034048	0.0205491	0.160448	0.235688
303	LPC(18:0) [sn2]	0.00943154	-0.00262654	0.0214896	0.1251	0.19586
304	LPC(18:1) [sn1]	0.00399744	-0.0081211	0.016116	0.517519	0.62701
305	LPC(18:1) [sn2]	0.00205134	-0.00995114	0.0140538	0.737362	0.804722
306	LPC(18:2) [sn1]	-0.0157094	-0.0281364	-0.00328239	0.0132875	0.0288157
307	LPC(18:2) [sn2]	-0.0173085	-0.0294152	-0.00520192	0.00512946	0.0124089
308	LPC(18:3) (a) [sn1] [104_sn1]	-0.0262226	-0.0385454	-0.0138998	3.26518e-05	0.000120548
309	LPC(18:3) [sn1] (a)/LPC(18:3) [sn2] (b)	-0.0236843	-0.0359296	-0.011439	0.000157391	0.000490927
310	LPC(18:3) [sn1] (b)	-0.00844815	-0.0205688	0.00367254	0.171656	0.248469
311	LPC(18:3) [sn2] (a)	-0.0278008	-0.0398797	-0.0157219	7.14893e-06	3.10069e-05
312	LPC(19:0) (a) [sn1] [104_sn1]	-0.00663415	-0.0188723	0.00560398	0.287632	0.387563
313	LPC(19:0) [sn1] (a) / LPC(19:0) [sn2] (b)	-0.011759	-0.023855	0.000336988	0.0567177	0.0996981
314	LPC(19:0) [sn1] (b)	-0.017348	-0.0292903	-0.00540568	0.00446144	0.0108646
315	LPC(19:0) [sn2] (a)	-0.005932	-0.0180389	0.00617491	0.336476	0.446805
316	LPC(19:1) (a)	0.00688692	-0.00532614	0.0191	0.268692	0.366762
317	LPC(19:1) (b)	0.00269718	-0.00958049	0.0149748	0.666442	0.752378
318	LPC(19:1) (c)	-0.0158923	-0.0281277	-0.00365697	0.0109661	0.0242112
319	LPC(20:0) [sn1]	-0.0135867	-0.0257071	-0.00146641	0.0280595	0.054847
320	LPC(20:0) [sn2]	-0.0140689	-0.0262843	-0.00185339	0.0240393	0.0481443
321	LPC(20:1) [sn1]	-0.00297813	-0.0157171	0.00976083	0.646451	0.73579
322	LPC(20:1) [sn2]	-0.00509411	-0.0177876	0.00759934	0.431093	0.541081
323	LPC(20:2) [sn1]	-0.00980322	-0.0223077	0.00270129	0.124235	0.195359
324	LPC(20:2) [sn2]	-0.0181471	-0.0305142	-0.00578001	0.00407594	0.0101277
325	LPC(20:3) [sn1]	0.0183915	0.00629138	0.0304917	0.00293372	0.00757188
326	LPC(20:3) [sn2]	0.0234174	0.0116488	0.035186	0.00010152	0.000330731
327	LPC(20:4) [sn1]	0.0302597	0.0180756	0.0424439	1.30273e-06	6.63125e-06
328	LPC(20:4) [sn2]	0.0324441	0.0205492	0.0443391	1.11272e-07	7.15461e-07
329	LPC(20:5) [sn1]	-0.000728066	-0.0127772	0.0113211	0.90562	0.941588
330	LPC(20:5) [sn2]	-0.00225943	-0.0142628	0.00974397	0.711878	0.785853
331	LPC(22:0) [sn1]	-0.0418258	-0.0534499	-0.0302017	3.42559e-12	5.79664e-11
332	LPC(22:0) [sn2]	-0.0403702	-0.0519953	-0.0287452	1.78198e-11	2.61238e-10
333	LPC(22:1) [sn1]	0.00393538	-0.00845379	0.0163246	0.533143	0.642753
334	LPC(22:1) [sn2]	-0.000550333	-0.0130588	0.0119582	0.931204	0.954647
335	LPC(22:4) [sn1]	0.0102512	-0.00182731	0.0223296	0.0961168	0.157968
336	LPC(22:4) [sn2]	0.0054554	-0.00643766	0.0173485	0.368198	0.475995
337	LPC(22:5) (n3) [sn1] [104_sn1]	-0.0091967	-0.0213308	0.00293737	0.13722	0.209111
338	LPC(22:5) [sn1] (n3)/LPC(22:5) [sn2] (n6)	-0.0081779	-0.0200847	0.00372891	0.177991	0.256322
339	LPC(22:5) [sn1] (n6)	-0.00491705	-0.0172615	0.00742739	0.434541	0.544476
340	LPC(22:5) [sn2] (n3)	-0.0102218	-0.0221117	0.00166805	0.0918925	0.152392
341	LPC(22:6) [sn1]	-0.00372579	-0.0160657	0.00861416	0.553593	0.657673
342	LPC(22:6) [sn2]	-0.00991826	-0.0221199	0.00228342	0.110982	0.176512
343	LPC(24:0) [sn1]	-0.0508441	-0.0616555	-0.0400327	2.12828e-19	9.17666e-18
344	LPC(24:0) [sn2]	-0.0468806	-0.0577595	-0.0360016	1.19169e-16	3.49403e-15
345	LPC(26:0) [sn1]	-0.0485715	-0.0595531	-0.0375898	2.00602e-17	7.35208e-16
346	LPC(26:0) [sn2]	-0.0526202	-0.0636034	-0.0416369	4.8569e-20	2.22507e-18
347	LPC(O-16:0)	0.00625766	-0.00586077	0.0183761	0.311096	0.415362
348	LPC(O-18:0)	-0.00316672	-0.0152043	0.00887088	0.605746	0.703523
349	LPC(O-18:1)	0.020213	0.00786021	0.0325658	0.0013695	0.00365035
350	LPC(O-20:0)	-0.0152679	-0.0274135	-0.00312223	0.0138097	0.0296847
351	LPC(O-20:1)	0.00486682	-0.00738168	0.0171153	0.435673	0.544963
352	LPC(O-22:0)	-0.0318583	-0.0439013	-0.0198153	2.60597e-07	1.52814e-06
353	LPC(O-22:1)	-0.00748171	-0.0197803	0.00481683	0.232797	0.323796
354	LPC(O-24:0)	-0.0373357	-0.0490881	-0.0255833	7.11779e-10	7.78707e-09
355	LPC(O-24:1)	-0.0156957	-0.0279559	-0.00343546	0.0121641	0.0265366
356	LPC(O-24:2)	-0.0208408	-0.0330144	-0.00866712	0.000813884	0.00224277
357	LPC(P-16:0)	0.0176813	0.00574988	0.0296126	0.0037251	0.00935102
358	LPC(P-17:0) (a)	0.0145712	0.00266912	0.0264733	0.0164788	0.0345113
359	LPC(P-17:0) (b)	0.00300111	-0.00915842	0.0151606	0.628201	0.721742
360	LPC(P-18:0)	0.00271972	-0.00912131	0.0145608	0.652232	0.740072
361	LPC(P-18:1)	0.0241107	0.0122943	0.035927	6.75056e-05	0.000230147
362	LPC(P-20:0)	-0.0111065	-0.0229793	0.000766302	0.066695	0.114759
363	PE(15-MHDA_18:1)	-0.00839895	-0.0200037	0.00320584	0.155814	0.233562
364	PE(15-MHDA_18:2)	-0.0230947	-0.034766	-0.0114234	0.000110858	0.000357969
365	PE(15-MHDA_20:4)	0.0121388	0.000341643	0.0239359	0.0437384	0.0819115
366	PE(15-MHDA_22:6)	-0.00277172	-0.0147261	0.00918265	0.649163	0.737732
367	PE(16:0_16:0)	-0.0203446	-0.0304033	-0.010286	7.80282e-05	0.000261163
368	PE(16:0_16:1)	-0.00136285	-0.0120741	0.00934835	0.802851	0.860717
369	PE(16:0_18:1)	-0.00367085	-0.0134315	0.00608979	0.460612	0.572252
370	PE(16:0_18:2)	-0.0215319	-0.0314427	-0.0116211	2.2323e-05	8.52228e-05
371	PE(16:0_18:3) (a)	-0.026249	-0.0371083	-0.0153896	2.45585e-06	1.19215e-05
372	PE(16:0_18:3) (b)	-0.0184803	-0.0289823	-0.00797836	0.000580097	0.00163543
373	PE(16:0_20:3)	-0.0152835	-0.0254851	-0.00508194	0.00336597	0.00850779
374	PE(16:0_20:4)	0.0166587	0.00658452	0.0267329	0.00121802	0.00327037
375	PE(16:0_20:5)	-0.013158	-0.024207	-0.00210898	0.0196502	0.0401214
376	PE(16:0_22:6)	-0.000843633	-0.0122602	0.010573	0.884713	0.931746
377	PE(16:1_18:2)	-0.0145627	-0.0250653	-0.00406022	0.00663105	0.0152818
378	PE(16:1_20:4)	0.0103073	6.48338e-05	0.0205498	0.0485706	0.0892287
379	PE(17:0_18:1)	-0.006127	-0.0167531	0.00449914	0.258068	0.354904
380	PE(17:0_18:2)	-0.0241817	-0.0347314	-0.0136319	7.78539e-06	3.31784e-05
381	PE(17:0_20:4)	0.0195775	0.0077567	0.0313983	0.00119674	0.00322504
382	PE(17:0_22:6)	0.000377911	-0.0111425	0.0118983	0.948678	0.969848
383	PE(18:0_18:1)	-0.00881652	-0.019001	0.00136798	0.0896614	0.149708
384	PE(18:0_18:2)	-0.0113056	-0.020884	-0.00172708	0.0207597	0.0422691
385	PE(18:0_20:3) (a)	0.0194405	0.00998424	0.0288968	5.95324e-05	0.000206812
386	PE(18:0_20:3) (b)	0.0089535	-0.00190986	0.0198169	0.106099	0.171754
387	PE(18:0_20:4)	0.0421748	0.0319898	0.0523599	1.55782e-15	4.07815e-14
388	PE(18:0_22:4)	0.0128447	0.00264948	0.0230399	0.0136	0.0294064
389	PE(18:0_22:5) (n3)	0.0008607	-0.00845249	0.0101739	0.856101	0.906824
390	PE(18:0_22:5) (n6)	0.0133335	0.00246331	0.0242038	0.0162731	0.0342764
391	PE(18:0_22:6)	0.0234699	0.0129305	0.0340093	1.39219e-05	5.54604e-05
392	PE(18:1_18:1)	-0.0271512	-0.038888	-0.0154145	6.42698e-06	2.83794e-05
393	PE(18:1_18:2)	-0.038563	-0.0496515	-0.0274745	1.66924e-11	2.49704e-10
394	PE(18:1_22:6) (a)	-0.00770877	-0.0187687	0.00335115	0.171657	0.248469
395	PE(18:1_22:6) (b)	0.00077789	-0.0107177	0.0122734	0.894368	0.936531
396	PE(20:0_20:4)	-0.0229981	-0.0330652	-0.012931	8.34237e-06	3.51434e-05
397	PE(36:0)	-0.0256434	-0.0380684	-0.0132184	5.5734e-05	0.000195469
398	PE(38:5) (a)	0.00697474	-0.00327434	0.0172238	0.182001	0.261582
399	PE(38:5) (b)	-0.00528506	-0.0156469	0.0050768	0.317058	0.421785
400	PE(O-16:0/18:2)	-0.0517912	-0.063441	-0.0401415	1.39835e-17	5.39467e-16
401	PE(O-16:0/20:3)	-0.029326	-0.0412231	-0.0174289	1.55788e-06	7.8214e-06
402	PE(O-16:0/20:4)	-0.0287705	-0.04048	-0.0170611	1.68119e-06	8.3831e-06
403	PE(O-16:0/22:4)	-0.00333838	-0.0154111	0.0087343	0.587441	0.68457
404	PE(O-16:0/22:6)	-0.0238762	-0.0355765	-0.0121758	6.7402e-05	0.000230147
405	PE(O-18:0/20:4)	-0.0276871	-0.0394222	-0.0159519	4.21692e-06	1.91988e-05
406	PE(O-18:0/22:5)	-0.0273383	-0.03895	-0.0157265	4.41471e-06	1.98527e-05
407	PE(O-18:0/22:6)	-0.0336172	-0.044824	-0.0224105	5.64979e-09	4.87211e-08
408	PE(O-18:1/18:2)	-0.0405348	-0.0523521	-0.0287174	3.08308e-11	4.26396e-10
409	PE(O-18:1/22:6)	-0.0259179	-0.0373903	-0.0144454	1.04652e-05	4.33389e-05
410	PE(O-34:1)	-0.0277613	-0.0394166	-0.0161061	3.4206e-06	1.60724e-05
411	PE(O-36:5)	-0.0393852	-0.0509005	-0.0278699	3.49753e-11	4.66326e-10
412	PE(O-38:5) (a)	-0.0237466	-0.0355811	-0.0119121	8.87967e-05	0.000294516
413	PE(O-38:5) (b)	-0.034421	-0.0456857	-0.0231564	2.97e-09	2.68767e-08
414	PE(P-15:0/20:4) (a)	-0.00683579	-0.0192507	0.00557911	0.280125	0.379541
415	PE(P-15:0/20:4) (b)	0.000120293	-0.0121823	0.0124229	0.984693	0.99429
416	PE(P-15:0/22:6) (a)	-0.0321844	-0.0440718	-0.020297	1.37319e-07	8.67715e-07
417	PE(P-15:0/22:6) (b)	0.011861	-0.000786608	0.0245086	0.0660156	0.114126
418	PE(P-16:0/18:1)	-0.0118421	-0.0237132	2.89173e-05	0.0505594	0.0911856
419	PE(P-16:0/18:2)	-0.0309923	-0.0425488	-0.0194359	1.79183e-07	1.09451e-06
420	PE(P-16:0/18:3)	-0.0289281	-0.0407406	-0.0171157	1.81613e-06	8.99474e-06
421	PE(P-16:0/20:3) (a)	-0.000800293	-0.013159	0.0115584	0.89889	0.93725
422	PE(P-16:0/20:3) (b)	-0.0221531	-0.03392	-0.0103861	0.000233874	0.000702581
423	PE(P-16:0/20:4)	0.00876062	-0.00331686	0.0208381	0.154892	0.232655
424	PE(P-16:0/20:5)	-0.0205828	-0.0324272	-0.0087384	0.000678405	0.00189076
425	PE(P-16:0/22:4)	0.0228742	0.0109923	0.0347562	0.000168812	0.000522106
426	PE(P-16:0/22:5) (n3)	0.0033612	-0.00830907	0.0150315	0.572014	0.671858
427	PE(P-16:0/22:5) (n6)	-0.00210344	-0.0143624	0.0101555	0.736364	0.804722
428	PE(P-16:0/22:6)	0.00912907	-0.0026779	0.020936	0.129487	0.200241
429	PE(P-17:0/20:4) (a)	0.00434893	-0.00771606	0.0164139	0.47945	0.589659
430	PE(P-17:0/20:4) (b)	0.00288507	-0.00931382	0.015084	0.642621	0.733709
431	PE(P-17:0/22:6) (a)	-0.00289098	-0.0147209	0.00893893	0.631591	0.724501
432	PE(P-17:0/22:6) (b)	-0.00699246	-0.0187806	0.00479573	0.244642	0.337708
433	PE(P-18:0/18:1)	-0.0128294	-0.0245582	-0.00110064	0.0320803	0.0618812
434	PE(P-18:0/18:2)	-0.0333245	-0.0447787	-0.0218703	1.56196e-08	1.18033e-07
435	PE(P-18:0/18:3)	-0.0274192	-0.0395655	-0.0152729	1.06271e-05	4.3762e-05
436	PE(P-18:0/20:3) (a)	-0.00656663	-0.0189285	0.00579524	0.297418	0.400013
437	PE(P-18:0/20:3) (b)	-0.0217351	-0.0332959	-0.0101743	0.00023852	0.000713613
438	PE(P-18:0/20:4)	0.00491309	-0.00704058	0.0168668	0.420051	0.529944
439	PE(P-18:0/20:5)	-0.02165	-0.0334096	-0.00989042	0.000319897	0.00095319
440	PE(P-18:0/22:4)	0.00533616	-0.0066362	0.0173085	0.381918	0.486862
441	PE(P-18:0/22:5) (n3)	-0.00772367	-0.0194541	0.0040068	0.19659	0.278186
442	PE(P-18:0/22:5) (n6)	-0.0181308	-0.0302288	-0.00603278	0.00335531	0.00850779
443	PE(P-18:0/22:6)	-0.0118756	-0.0235452	-0.000206014	0.0460992	0.0857632
444	PE(P-18:1/18:1)	-0.0100319	-0.0218474	0.00178366	0.0959888	0.157968
445	PE(P-18:1/18:1) (a)	-0.0109565	-0.0228865	0.000973612	0.0718081	0.12298
446	PE(P-18:1/18:1) (b)	-0.00305699	-0.0150621	0.00894814	0.617344	0.711498
447	PE(P-18:1/18:2) (a)	-0.0321465	-0.0437533	-0.0205398	7.13216e-08	4.93196e-07
448	PE(P-18:1/18:2) (b)	-0.0208523	-0.0327436	-0.00896096	0.000606139	0.0016958
449	PE(P-18:1/18:3)	-0.0274575	-0.0393499	-0.015565	6.69687e-06	2.9394e-05
450	PE(P-18:1/20:3) (a)	0.00313411	-0.00893471	0.0152029	0.610389	0.704591
451	PE(P-18:1/20:3) (b)	-0.00992959	-0.021716	0.00185684	0.0985883	0.161667
452	PE(P-18:1/20:4) (a)	0.00970506	-0.00221692	0.021627	0.110462	0.176403
453	PE(P-18:1/20:4) (b)	0.0115952	-0.000594781	0.0237851	0.0622467	0.108377
454	PE(P-18:1/20:5) (a)	-0.0224824	-0.0341946	-0.0107701	0.000176245	0.000540534
455	PE(P-18:1/20:5) (b)	-0.0142247	-0.0263094	-0.00213996	0.0211094	0.0428621
456	PE(P-18:1/22:4)	0.0300201	0.0179828	0.0420574	1.17798e-06	6.03818e-06
457	PE(P-18:1/22:5) (a)	-0.000154677	-0.0119628	0.0116534	0.979494	0.993042
458	PE(P-18:1/22:5) (b)	-0.00267911	-0.0148892	0.00953093	0.666817	0.752378
459	PE(P-18:1/22:6) (a)	0.00601086	-0.00630262	0.0183243	0.338267	0.447365
460	PE(P-18:1/22:6) (b)	0.00990728	-0.00208729	0.0219018	0.105344	0.171214
461	PE(P-19:0/20:4) (a)	0.000284998	-0.0118346	0.0124046	0.963197	0.980588
462	PE(P-19:0/20:4) (b)	-0.00252316	-0.0144729	0.00942661	0.67866	0.762972
463	PE(P-20:0/18:1)	-0.0174908	-0.0298831	-0.0050984	0.00572374	0.0137557
464	PE(P-20:0/18:2)	-0.0362715	-0.0479212	-0.0246218	1.51103e-09	1.53832e-08
465	PE(P-20:0/20:4)	0.0121061	-0.000113348	0.0243256	0.0521584	0.0935429
466	PE(P-20:0/22:6)	-0.00423783	-0.0165532	0.00807755	0.4996	0.610344
467	PE(P-20:1/20:4)	0.00502914	-0.00741713	0.0174754	0.427944	0.538049
468	PE(P-20:1/22:6)	-0.00599344	-0.0182776	0.0062907	0.338517	0.447365
469	LPE(16:0) [sn1]	-0.00296195	-0.0143475	0.00842357	0.609751	0.704591
470	LPE(16:0) [sn2]	-0.00419563	-0.0156741	0.00728281	0.4733	0.583223
471	LPE(17:0) [sn1]	-0.000104216	-0.0129367	0.0127283	0.987286	0.99429
472	LPE(17:0) [sn2]	-0.00130197	-0.01401	0.011406	0.840674	0.892825
473	LPE(18:0) [sn1]	0.0138917	0.00243875	0.0253447	0.0174998	0.0363381
474	LPE(18:0) [sn2]	0.0113515	-0.00031291	0.023016	0.0564557	0.0996981
475	LPE(18:1) [sn1]	-0.0180479	-0.0300393	-0.00605643	0.00322298	0.00823151
476	LPE(18:1) [sn2]	-0.0215429	-0.0334542	-0.00963151	0.000406748	0.00118783
477	LPE(18:2) [sn1]	-0.0286443	-0.0406299	-0.0166586	3.17421e-06	1.5161e-05
478	LPE(18:2) [sn2]	-0.0313276	-0.0430381	-0.0196171	1.91909e-07	1.15303e-06
479	LPE(20:4) [sn1]	0.0171388	0.00527891	0.0289987	0.0046715	0.0113384
480	LPE(20:4) [sn2]	0.0214783	0.0101594	0.0327972	0.000208732	0.000634192
481	LPE(22:6) [sn1]	0.00296568	-0.00894638	0.0148777	0.625207	0.71943
482	LPE(22:6) [sn2]	0.00282915	-0.00898838	0.0146467	0.638551	0.730199
483	LPE(P-16:0)	0.00325242	-0.00902122	0.0155261	0.603114	0.701719
484	LPE(P-18:0)	-0.0039111	-0.0159777	0.00815548	0.524825	0.634813
485	LPE(P-18:1)	0.0149457	0.00257103	0.0273204	0.0179843	0.0372387
486	LPE(P-20:0)	-0.0199891	-0.0324092	-0.00756906	0.00163989	0.00435521
487	PI (38:5) (b)	-0.023107	-0.0351414	-0.0110727	0.000175524	0.000540534
488	PI(15-MHDA_20:4)\PI(17:0_20:4)	-0.0138704	-0.0258815	-0.00185928	0.0236665	0.0476585
489	PI(16:0_16:1)	-0.00388156	-0.0153059	0.00754283	0.505033	0.615956
490	PI(16:0_20:3) (a)	-0.0421328	-0.0538234	-0.0304422	3.17053e-12	5.66829e-11
491	PI(16:0_20:3) (b)	-0.0381967	-0.0494022	-0.0269913	4.04944e-11	5.20744e-10
492	PI(16:0_20:4)	-0.00727982	-0.0189977	0.00443809	0.223037	0.31081
493	PI(16:0/16:0)	-0.0283081	-0.0395072	-0.0171091	8.46979e-07	4.49881e-06
494	PI(17:0_18:1)	-0.0275205	-0.0401362	-0.0149047	2.06818e-05	8.02103e-05
495	PI(17:0_18:2)	-0.0426226	-0.0540493	-0.0311959	5.73721e-13	1.16816e-11
496	PI(18:0_18:1)	-0.0292939	-0.0416598	-0.016928	3.85804e-06	1.80124e-05
497	PI(18:0_20:2)	-0.0519552	-0.0640699	-0.0398406	1.64098e-16	4.45495e-15
498	PI(18:0_20:3) (a)	-0.0196145	-0.0329569	-0.00627216	0.00400802	0.00999279
499	PI(18:0_20:3) (b)	-0.0293361	-0.0413516	-0.0173205	1.9499e-06	9.59244e-06
500	PI(18:0_20:4)	0.0088216	-0.00380482	0.021448	0.170639	0.248469
501	PI(18:0_22:4)	-0.0165588	-0.0284971	-0.00462056	0.0066138	0.0152818
502	PI(18:0_22:5) (n3)	-0.0235207	-0.0357822	-0.0112591	0.000178037	0.000543756
503	PI(18:0_22:5) (n6)	-0.0219282	-0.0347192	-0.00913723	0.000800352	0.0022138
504	PI(18:0_22:6)	-0.0278846	-0.0397109	-0.0160584	4.27458e-06	1.93411e-05
505	PI(18:1_18:2)	-0.0519903	-0.0640632	-0.0399174	1.24707e-16	3.51577e-15
506	PI(20:0_20:4)	-0.0302909	-0.0422297	-0.0183521	7.71765e-07	4.12923e-06
507	PI(34:0)	-0.0340014	-0.0455988	-0.0224039	1.21643e-08	9.4856e-08
508	PI(34:1)	-0.0168893	-0.0282835	-0.00549512	0.00371676	0.00935102
509	PI(36:2)	-0.0378993	-0.0502561	-0.0255424	2.60216e-09	2.38423e-08
510	PI(37:6)	-0.0415932	-0.0531564	-0.0300299	3.47957e-12	5.79664e-11
511	PI(38:5) (a)	-0.0326199	-0.0442881	-0.0209518	5.40296e-08	3.80805e-07
512	PI(38:6)	-0.0353235	-0.0470402	-0.0236069	4.75421e-09	4.14861e-08
513	PI(39:6)	-0.0373784	-0.0490195	-0.0257372	4.72601e-10	5.24873e-09
514	PIP1(38:4)	-0.00965347	-0.0226163	0.00330935	0.144198	0.218383
515	LPI(18:0) [sn1]	-0.00879683	-0.0209715	0.00337782	0.156497	0.233631
516	LPI(18:0) [sn2]	0.0013506	-0.0116851	0.0143863	0.838903	0.892825
517	LPI(18:1) [sn1]	0.000594088	-0.0120153	0.0132035	0.926342	0.952866
518	LPI(18:1) [sn2]	-0.0122264	-0.0245715	0.000118772	0.0522401	0.0935429
519	LPI(18:2) [sn1]	0.000924326	-0.0119362	0.0137849	0.887847	0.932431
520	LPI(18:2) [sn2]	-0.0145733	-0.0272211	-0.00192543	0.0239772	0.0481443
521	LPI(20:4) [sn1]	0.0285202	0.0160615	0.0409788	7.99667e-06	3.38818e-05
522	LPI(20:4) [sn2]	0.0162492	0.00374842	0.0287499	0.0109068	0.024153
523	PS(36:1)	0.012742	0.000394999	0.025089	0.043123	0.0810492
524	PS(36:2)	0.00741972	-0.00502148	0.0198609	0.242102	0.334832
525	PS(38:3)	0.020444	0.00859782	0.0322901	0.000738428	0.00205026
526	PS(38:4)	0.0318167	0.0202349	0.0433985	9.05429e-08	6.0888e-07
527	PS(38:5)	-0.000682927	-0.012989	0.0116232	0.913288	0.946874
528	PS(40:5)	0.00404452	-0.0081983	0.0162873	0.516888	0.62701
529	PS(40:6)	0.0173526	0.0060271	0.0286781	0.00271399	0.00705444
530	PG(34:1)	-0.00904956	-0.0189987	0.000899582	0.0745702	0.126821
531	PG(36:1)	-0.00125691	-0.0111522	0.00863843	0.803179	0.860717
532	PG(36:2)	-0.0255681	-0.0372139	-0.0139223	1.83152e-05	7.14097e-05
533	CE(14:0)	-0.029694	-0.0412903	-0.0180977	6.11862e-07	3.42362e-06
534	CE(15:0)	-0.0112087	-0.021121	-0.0012965	0.0267176	0.0525041
535	CE(16:0)	-0.00560161	-0.0180025	0.00679926	0.375541	0.481444
536	CE(16:1)	0.00574403	-0.00662803	0.0181161	0.362414	0.471009
537	CE(16:2)	-0.0137551	-0.0235398	-0.00397044	0.00591919	0.0140936
538	CE(17:0)	0.00134468	-0.0103419	0.0130313	0.821379	0.877654
539	CE(17:1)	0.00850394	-0.00234991	0.0193578	0.124465	0.195359
540	CE(18:0)	0.0141668	0.00402511	0.0243085	0.0062401	0.0146207
541	CE(18:1)	0.00859651	-0.00165883	0.0188519	0.100281	0.164076
542	CE(18:2)	-0.01025	-0.0199888	-0.000511245	0.0391506	0.0745386
543	CE(18:3)	-0.0195581	-0.0294799	-0.00963636	0.000117669	0.000376643
544	CE(20:0)	0.00153804	-0.00990302	0.0129791	0.791953	0.852425
545	CE(20:1)	0.00399826	-0.00564875	0.0136453	0.416169	0.526859
546	CE(20:2)	-0.0154064	-0.0259648	-0.00484812	0.0042866	0.0105439
547	CE(20:3)	0.0288864	0.0183574	0.0394154	9.40763e-08	6.2689e-07
548	CE(20:4)	0.0180016	0.0100629	0.0259404	9.70776e-06	4.05806e-05
549	CE(20:5)	-0.00306566	-0.0126324	0.00650106	0.529536	0.639456
550	CE(22:0)	-0.0114	-0.0228314	3.13932e-05	0.050631	0.0911856
551	CE(22:1)	0.00727616	-0.00361161	0.0181639	0.189977	0.271979
552	CE(22:4)	0.0125785	0.00285455	0.0223025	0.0112967	0.0247919
553	CE(22:5) (n3)	-0.00636331	-0.0153337	0.00260704	0.164186	0.240216
554	CE(22:5) (n6)	-0.00988498	-0.0211463	0.00137635	0.0852747	0.143035
555	CE(22:6)	-0.00566923	-0.0144736	0.0031351	0.206628	0.290707
556	CE(24:0)	-0.00883449	-0.020386	0.00271706	0.133701	0.205456
557	CE(24:1)	-0.00322112	-0.0143697	0.0079275	0.570798	0.671858
558	CE(24:4)	0.0342016	0.0235837	0.0448195	4.17421e-10	4.70723e-09
559	CE(24:5)	0.000562605	-0.0103871	0.0115123	0.919694	0.950826
560	CE(24:6)	-0.0225947	-0.0339249	-0.0112645	9.80382e-05	0.000320812
561	COH	-0.00105772	-0.0110226	0.00890711	0.835013	0.890924
562	DE(16:0)	0.00449482	-0.00770671	0.0166963	0.469848	0.581384
563	DE(18:1)	0.00303005	-0.00751386	0.013574	0.572867	0.671858
564	DE(18:2)	-0.0151595	-0.0242857	-0.00603334	0.00115729	0.00313025
565	DE(20:4)	0.0224534	0.0137597	0.0311471	4.91033e-07	2.79013e-06
566	DE(20:5)	-0.00346756	-0.0139363	0.00700119	0.515784	0.626981
567	DE(22:6)	-0.00170716	-0.01061	0.00719569	0.706735	0.782533
568	FA(14:0)	-0.00249842	-0.014809	0.0098122	0.690478	0.769836
569	FA(15:0)	-0.0159597	-0.0287136	-0.0032058	0.0142445	0.0304409
570	FA(16:0)	0.0254583	0.0135594	0.0373573	2.96036e-05	0.000110711
571	FA(16:1)	0.0423778	0.0306103	0.0541454	3.28833e-12	5.73892e-11
572	FA(16:2)	-0.01061	-0.0235077	0.00228763	0.106761	0.171754
573	FA(17:0)	0.0134361	0.00044747	0.0264247	0.0426292	0.080327
574	FA(17:1)	0.0304571	0.0181835	0.0427307	1.32841e-06	6.71533e-06
575	FA(18:0)	-0.0113491	-0.024354	0.00165574	0.0871011	0.145765
576	FA(18:1)	0.0408824	0.0289216	0.0528431	3.59692e-11	4.70812e-10
577	FA(18:2)	0.023235	0.0109877	0.0354822	0.000209379	0.000634192
578	FA(18:3)	0.0117025	-0.000288612	0.0236937	0.0557617	0.0987278
579	FA(20:2)	0.0150345	0.00248211	0.0275868	0.0189575	0.0388152
580	FA(20:3)	0.0253678	0.0134284	0.0373072	3.35657e-05	0.000123018
581	FA(20:4)	0.031406	0.0194635	0.0433486	3.05546e-07	1.7775e-06
582	FA(20:5)	-0.00188786	-0.0139338	0.0101581	0.758454	0.818773
583	FA(22:4)	0.0534828	0.0418566	0.0651089	1.15673e-18	4.71044e-17
584	FA(22:5)	0.0306779	0.0186033	0.0427525	7.45502e-07	4.04887e-06
585	FA(22:6)	0.00593869	-0.0062493	0.0181267	0.339154	0.447365
586	AC(12:0)	0.0395848	0.0274087	0.0517608	2.9002e-10	3.37436e-09
587	AC(13:0)	0.00420215	-0.0082815	0.0166858	0.508987	0.619746
588	AC(14:0)	0.0357422	0.0236611	0.0478233	9.01256e-09	7.34023e-08
589	AC(14:1)	0.0522596	0.0402815	0.0642377	5.16487e-17	1.64602e-15
590	AC(14:2)	0.0455781	0.0333501	0.0578062	5.95776e-13	1.18028e-11
591	AC(15:0) (a)	0.0110133	-0.00138059	0.0234071	0.0814987	0.13733
592	AC(15:0) (b)	0.0223601	0.0100062	0.0347141	0.000402698	0.00118545
593	AC(16:0)	0.0308198	0.018772	0.0428675	6.27367e-07	3.48379e-06
594	AC(16:1)	0.0717869	0.0602222	0.0833517	1.4471e-31	2.6518e-29
595	AC(17:0) (a)	0.0292104	0.0168516	0.0415693	4.05611e-06	1.88173e-05
596	AC(17:0) (b)	0.0156456	0.00319958	0.0280916	0.0138088	0.0296847
597	AC(18:0)	0.00583983	-0.00634523	0.0180249	0.347135	0.455188
598	AC(18:1)	0.0537252	0.0414396	0.0660108	4.40914e-17	1.46905e-15
599	AC(18:2)	0.0240069	0.0113377	0.0366761	0.000213017	0.000642557
600	DG(14:0_16:0)	-0.020887	-0.0309947	-0.0107794	5.45519e-05	0.000192243
601	DG(14:0_18:2)	-0.030672	-0.0410202	-0.0203239	8.473e-09	6.97833e-08
602	DG(16:0_16:0)	-0.00255348	-0.0113277	0.00622074	0.568009	0.671533
603	DG(16:0_16:1)	0.00715514	-0.00227586	0.0165861	0.136827	0.208946
604	DG(16:0_18:1)	0.0143195	0.00627347	0.0223656	0.000502217	0.00143239
605	DG(16:0_18:2)	4.5148e-05	-0.00970338	0.00979368	0.992749	0.996397
606	DG(16:0_20:4)	0.0128058	0.00275432	0.0228572	0.0125862	0.027376
607	DG(16:0_22:5)	0.00351574	-0.00645058	0.0134821	0.488879	0.599245
608	DG(16:0_22:6)	0.0133471	0.00240341	0.0242908	0.0168908	0.0351731
609	DG(16:1_18:1)	0.0214351	0.0131207	0.0297496	5.14485e-07	2.90091e-06
610	DG(18:0_18:1)	0.013537	0.00433644	0.0227375	0.00397764	0.0099509
611	DG(18:0_18:2)	6.05689e-05	-0.0101306	0.0102518	0.990695	0.996131
612	DG(18:0_20:4)	0.0370549	0.0262638	0.0478461	2.93962e-11	4.14374e-10
613	DG(18:0_22:6)	0.0012516	-0.0110425	0.0135457	0.841668	0.892825
614	DG(18:1_18:1)	0.0179766	0.00881205	0.0271411	0.000127026	0.000403074
615	DG(18:1_18:2)	0.00647289	-0.00382355	0.0167693	0.21758	0.304945
616	DG(18:1_18:3)	-0.00443138	-0.0150866	0.00622379	0.414558	0.526639
617	DG(18:1_20:3)	0.0209078	0.0103522	0.0314633	0.00010913	0.000353948
618	DG(18:1_20:4)	0.0306377	0.0204766	0.0407987	4.73364e-09	4.14861e-08
619	DG(18:1_20:5)	0.00608997	-0.0055638	0.0177438	0.305326	0.409148
620	DG(18:1_22:5)	0.0236153	0.0134243	0.0338064	6.20195e-06	2.75517e-05
621	DG(18:1_22:6)	0.0253602	0.0140871	0.0366333	1.13888e-05	4.66369e-05
622	DG(18:2_18:2)	-0.00241579	-0.0141059	0.0092743	0.685128	0.767888
623	DG(18:2_20:4)	0.0158349	0.00452293	0.0271468	0.00613202	0.0144704
624	DG(18:2_22:6)	0.0152579	0.00363263	0.0268831	0.0101612	0.0227077
625	TG(48:0) [NL-16:0]	-0.00896011	-0.0203343	0.0024141	0.122433	0.193412
626	TG(48:0) [NL-18:0]	-0.0264912	-0.038701	-0.0142814	2.28886e-05	8.6481e-05
627	TG(48:1) [NL-16:1]	0.00620921	-0.00484239	0.0172608	0.270443	0.367783
628	TG(48:1) [NL-18:1]	-0.0308728	-0.0419525	-0.0197931	5.96379e-08	4.16329e-07
629	TG(48:2) [NL-14:0]	-0.020748	-0.0307221	-0.0107739	4.87055e-05	0.000175006
630	TG(48:2) [NL-14:1]	-0.0106626	-0.0216249	0.000299674	0.0565851	0.0996981
631	TG(48:2) [NL-16:1]	0.0131609	0.00245483	0.023867	0.0160415	0.0339839
632	TG(48:2) [NL-18:2]	-0.0356333	-0.0463391	-0.0249276	1.11481e-10	1.36193e-09
633	TG(48:3) [NL-14:0]	-0.0235442	-0.0329535	-0.0141349	1.08668e-06	5.64921e-06
634	TG(48:3) [NL-16:1]	-0.00296485	-0.0126018	0.00667212	0.5461	0.654071
635	TG(48:3) [NL-18:3]	-0.0328011	-0.043211	-0.0223912	9.70011e-10	1.03046e-08
636	TG(49:1) [NL-16:1]	0.00808905	-0.00459509	0.0207732	0.211017	0.296314
637	TG(49:1) [NL-17:1]	0.00193881	-0.00937717	0.0132548	0.736734	0.804722
638	TG(50:0) [NL-18:0]	-0.00865642	-0.0191204	0.00180757	0.104808	0.17072
639	TG(50:1) [NL-14:0]	-0.0238714	-0.0359609	-0.0117818	0.000114625	0.000368508
640	TG(50:1) [NL-16:0]	0.000764565	-0.00987895	0.0114081	0.887908	0.932431
641	TG(50:1) [NL-18:1]	-0.000279076	-0.0109328	0.0103746	0.959007	0.97768
642	TG(50:2) [NL-14:0]	-0.0210094	-0.0333737	-0.00864506	0.000889803	0.00243368
643	TG(50:2) [NL-16:1]	0.0314844	0.0204604	0.0425084	2.81146e-08	2.03632e-07
644	TG(50:2) [NL-18:1]	0.0107941	-0.000799312	0.0223875	0.0679844	0.116704
645	TG(50:2) [NL-18:2]	-0.0134335	-0.0245835	-0.00228351	0.0182676	0.0377187
646	TG(50:3) [NL-14:0]	-0.0316158	-0.0434143	-0.0198174	1.83228e-07	1.10997e-06
647	TG(50:3) [NL-14:1]	0.0026129	-0.00930935	0.0145352	0.667184	0.752378
648	TG(50:3) [NL-16:1]	0.0314444	0.0212331	0.0416556	2.25419e-09	2.11836e-08
649	TG(50:3) [NL-18:2]	0.00196331	-0.00821789	0.0121445	0.705157	0.781967
650	TG(50:3) [NL-18:3]	-0.0147392	-0.0256797	-0.00379869	0.00833861	0.0189232
651	TG(50:4) [NL-14:0]	-0.0301585	-0.0406918	-0.0196253	2.59928e-08	1.92451e-07
652	TG(50:4) [NL-18:3]	-0.0157711	-0.0253154	-0.00622678	0.00122798	0.00328508
653	TG(50:4) [NL-20:4]	-0.0111826	-0.022287	-7.82749e-05	0.0484104	0.0891579
654	TG(51:0) [NL-16:0]	-0.00606714	-0.0168881	0.00475381	0.271427	0.368437
655	TG(51:1) [NL-17:0]	0.00726127	-0.00273942	0.017262	0.154489	0.232527
656	TG(51:2) [NL-15:0]	0.00850792	-0.00342421	0.0204401	0.162026	0.237531
657	TG(51:2) [NL-17:0]	0.0274238	0.0171536	0.0376939	2.01927e-07	1.20335e-06
658	TG(51:2) [NL-17:1]	0.0274064	0.0171347	0.0376781	2.06296e-07	1.21948e-06
659	TG(52:1) [NL-18:0]	0.00709381	-0.00206451	0.0162521	0.128805	0.199606
660	TG(52:1) [NL-18:1]	0.00814098	-0.00110444	0.0173864	0.0842984	0.141722
661	TG(52:2) [NL-16:0]	0.0135493	0.00167344	0.0254253	0.0253927	0.050305
662	TG(52:2) [NL-18:2]	-0.0169888	-0.0283133	-0.00566432	0.00332338	0.00845847
663	TG(52:3) [NL-16:1]	0.034185	0.0219578	0.0464121	5.39253e-08	3.80805e-07
664	TG(52:3) [NL-18:2]	0.00785617	-0.00417168	0.019884	0.200188	0.282731
665	TG(52:4) [NL-16:1]	0.025339	0.0134815	0.0371965	3.02595e-05	0.00011259
666	TG(52:4) [NL-18:2]	0.00818463	-0.00395351	0.0203228	0.186033	0.266853
667	TG(52:4) [NL-18:3]	-0.00543854	-0.0166043	0.00572726	0.339338	0.447365
668	TG(52:5) [NL-18:3]	-0.00960374	-0.0201481	0.000940615	0.0741849	0.126575
669	TG(52:5) [NL-20:4]	0.0161049	0.00504161	0.0271681	0.0043787	0.0107344
670	TG(52:5) [NL-20:5]	-0.00190759	-0.0137354	0.00992025	0.751658	0.816245
671	TG(53:2) [NL-17:1]	0.0202695	0.0098155	0.0307235	0.000151651	0.000475043
672	TG(53:2) [NL-18:1]	0.0184511	0.00820216	0.0287	0.000432268	0.00125735
673	TG(54:0) [NL-18:0]	-0.00730062	-0.0193637	0.00476249	0.235215	0.325922
674	TG(54:1) [NL-18:1]	-0.00413865	-0.0150383	0.00676104	0.456313	0.567873
675	TG(54:2) [NL-18:0]	0.00826669	-0.00269247	0.0192259	0.139097	0.211531
676	TG(54:2) [NL-20:1]	0.01029	-2.35575e-05	0.0206035	0.0505244	0.0911856
677	TG(54:3) [NL-18:1]	0.00306896	-0.00957469	0.0157126	0.633898	0.726011
678	TG(54:3) [NL-18:2]	-0.000794575	-0.013055	0.0114659	0.898809	0.93725
679	TG(54:4) [NL-18:2]	-0.00723789	-0.0198758	0.00540005	0.261287	0.357783
680	TG(54:4) [NL-20:3]	0.0205751	0.00908068	0.0320695	0.000465981	0.00133947
681	TG(54:5) [NL-18:3]	-0.008994	-0.0214617	0.00347374	0.15717	0.234157
682	TG(54:5) [NL-20:4]	0.0363861	0.0240338	0.0487383	1.04101e-08	8.29417e-08
683	TG(54:6) [NL-18:3]	-0.0148159	-0.0266448	-0.00298693	0.0141557	0.0303396
684	TG(54:6) [NL-20:4]	0.0330949	0.02098	0.0452097	1.06448e-07	6.96666e-07
685	TG(54:6) [NL-20:5]	0.0101597	-0.00223314	0.0225525	0.107969	0.172798
686	TG(54:6) [NL-22:6]	0.0134648	0.00174092	0.0251887	0.0244371	0.0488075
687	TG(54:7) [NL-20:5]	0.00318251	-0.00828383	0.0146488	0.586052	0.684039
688	TG(54:7) [NL-22:6]	0.0165826	0.00570137	0.0274638	0.0028597	0.00740692
689	TG(56:6) [NL-20:4]	0.0378563	0.0255451	0.0501674	2.37355e-09	2.20229e-08
690	TG(56:6) [NL-22:5](a)	0.0310087	0.0188008	0.0432165	7.50159e-07	4.04887e-06
691	TG(56:6) [NL-22:5](b)	0.0307259	0.0185349	0.0429169	9.10213e-07	4.7999e-06
692	TG(56:7) [NL-20:4]	0.0294574	0.0169792	0.0419356	4.16302e-06	1.90718e-05
693	TG(56:7) [NL-20:5]	0.00909328	-0.00314776	0.0213343	0.145197	0.219442
694	TG(56:7) [NL-22:5](a)	0.0218385	0.00961202	0.0340649	0.000479186	0.00137204
695	TG(56:7) [NL-22:5](b)	0.0219381	0.00971865	0.0341575	0.000448197	0.00129342
696	TG(56:7) [NL-22:6]	0.0313769	0.0193453	0.0434084	3.81332e-07	2.19673e-06
697	TG(56:8) [NL-20:4]	0.0134011	0.00114253	0.0256596	0.0321804	0.0619114
698	TG(56:8) [NL-20:5]	-0.00199259	-0.0140304	0.0100453	0.745342	0.811792
699	TG(56:8) [NL-22:6]	0.0237495	0.0118744	0.0356246	9.36337e-05	0.000307774
700	TG(56:9) [NL-22:6]	0.00551149	-0.00603696	0.0170599	0.349162	0.457028
701	TG(58:10) [NL-22:6]	0.00363588	-0.00829399	0.0155657	0.549867	0.65537
702	TG(58:8) [NL-22:6]	0.0212969	0.008664	0.0339298	0.000976333	0.00265056
703	TG(58:9) [NL-22:6]	0.00817875	-0.00415104	0.0205085	0.19328	0.275095
704	TG(O-50:1) [NL-15:0]	-0.00361522	-0.0154759	0.00824541	0.549818	0.65537
705	TG(O-50:1) [NL-16:0]	0.00594335	-0.00549213	0.0173788	0.307966	0.411933
706	TG(O-50:1) [NL-17:1]	-0.00266018	-0.0140062	0.00868585	0.645497	0.73579
707	TG(O-50:1) [NL-18:1]	-0.0049428	-0.016941	0.00705535	0.418976	0.529499
708	TG(O-50:2) [NL-16:1]	0.0178397	0.00515573	0.0305238	0.00589484	0.0140936
709	TG(O-50:2) [NL-18:1]	0.00716239	-0.00601871	0.0203435	0.286483	0.386726
710	TG(O-50:2) [NL-18:2]	-0.000498239	-0.0133875	0.012391	0.939539	0.961846
711	TG(O-50:3) [NL-18:2]	-0.00211982	-0.0144289	0.0101892	0.735429	0.804722
712	TG(O-52:0) [NL-16:0]	-0.00888616	-0.0202536	0.00248126	0.125319	0.19586
713	TG(O-52:1) [NL-16:0]	-0.003177	-0.0140197	0.00766575	0.565371	0.669494
714	TG(O-52:1) [NL-18:1]	-0.00916128	-0.0204674	0.00214483	0.112112	0.177875
715	TG(O-52:2) [NL-16:0]	0.0163956	0.00471105	0.0280802	0.00601131	0.0142598
716	TG(O-52:2) [NL-17:1]	0.0128774	0.00127853	0.0244762	0.0295977	0.0575467
717	TG(O-52:2) [NL-18:1]	0.0123225	-0.000124082	0.024769	0.0523228	0.0935429
718	TG(O-54:2) [NL-17:1]	-0.000109362	-0.0121284	0.0119097	0.985755	0.99429
719	TG(O-54:2) [NL-18:1]	0.00725985	-0.00439928	0.018919	0.221982	0.310213
720	TG(O-54:3) [NL-17:1]	0.00992985	-0.00280735	0.022667	0.126348	0.19705
721	TG(O-54:3) [NL-18:1]	0.00955896	-0.0032011	0.022319	0.141831	0.215243
722	TG(O-54:4) [NL-17:1]	-0.00851271	-0.0208854	0.00386002	0.177238	0.255739
723	TG(O-54:4) [NL-18:2]	0.00256085	-0.0105604	0.0156821	0.701762	0.779381
724	Ubiquinone	0.00900653	-0.0035096	0.0215227	0.158199	0.234252
725	CE(18:2) [+OH]	-0.0162916	-0.0280272	-0.00455603	0.0065678	0.0152818
726	CE(20:4) [+OH]	0.0203737	0.009258	0.0314894	0.00033997	0.0010089
727	CE(22:6) [+OH]	-0.00318244	-0.0139375	0.00757266	0.561538	0.666031
728	LPC(18:2) [+OH]	-0.0119579	-0.0239479	3.20807e-05	0.0506147	0.0911856
729	LPC(20:4) [+OH]	0.0158757	0.00442216	0.0273293	0.00665059	0.0152818
730	LPC(22:6) [+OH]	0.00242605	-0.00922776	0.0140799	0.682933	0.7666
731	PC(34:2) [+OH]	-0.0133992	-0.0251728	-0.00162558	0.025759	0.0507563
732	PC(36:4) [+OH]	0.0570305	0.0469283	0.0671328	9.89673e-27	9.06788e-25
733	PC(38:6) [+OH]	-0.00540863	-0.0168618	0.00604456	0.354243	0.462029

## Sheet: Supp 2
Supp 2. Linear regression between maternal pre-pregnancy BMI and umbilical cord lipidome
#	Lipid	Beta	LCI	UCI	p value	BH p value
1	Sph(d16:1)	-0.0668421	-0.160455	0.0267705	0.161399	0.439798
2	Sph(d18:1)	-0.00201503	-0.0155797	0.0115497	0.770646	0.919303
3	Sph(d18:2)	-0.00155839	-0.0154793	0.0123625	0.826107	0.946151
4	S1P(d16:1)	-0.00199356	-0.015661	0.0116739	0.774683	0.919303
5	S1P(d18:0)	0.00899411	-0.00450822	0.0224964	0.191374	0.473769
6	S1P(d18:1)	0.00510542	-0.00806704	0.0182779	0.446953	0.718872
7	S1P(d18:2)	0.00994044	-0.00365629	0.0235372	0.151631	0.42422
8	Cer(d18:0/16:0)	-0.00298357	-0.0168667	0.0108996	0.673214	0.868778
9	Cer(d18:0/18:0)	0.00800283	-0.00565144	0.0216571	0.250249	0.527477
10	Cer(d18:0/20:0)	-0.000472053	-0.0143648	0.0134207	0.946833	0.990305
11	Cer(d18:0/22:0)	-0.000535741	-0.0142412	0.0131697	0.93885	0.98876
12	Cer(d18:0/24:0)	-0.00124398	-0.0151591	0.0126711	0.860727	0.955337
13	Cer(d18:0/24:1)	0.00168783	-0.0116978	0.0150735	0.804553	0.936091
14	Cer(d16:1/16:0)	0.00359711	-0.0103222	0.0175164	0.612062	0.83816
15	Cer(d16:1/18:0)	-0.00111531	-0.0148094	0.0125788	0.873008	0.959393
16	Cer(d16:1/20:0)	0.00059257	-0.0131039	0.014289	0.932333	0.987282
17	Cer(d16:1/22:0)	-0.00546426	-0.0191124	0.00818385	0.432114	0.700765
18	Cer(d16:1/23:0)	-0.0075723	-0.0217234	0.00657875	0.29382	0.58208
19	Cer(d16:1/24:0)	-0.00676436	-0.0204559	0.00692719	0.332397	0.618393
20	Cer(d16:1/24:1)	0.00276713	-0.0104426	0.0159769	0.681008	0.868922
21	Cer(d17:1/16:0)	0.00351749	-0.0107094	0.0177443	0.627541	0.842557
22	Cer(d17:1/18:0)	-0.00632241	-0.0204277	0.00778284	0.379159	0.652402
23	Cer(d17:1/20:0)	-0.00115426	-0.0152713	0.0129628	0.872515	0.959393
24	Cer(d17:1/22:0)	-0.00475055	-0.0186766	0.00917546	0.503252	0.763734
25	Cer(d17:1/23:0)	-0.0075207	-0.0215679	0.00652653	0.293566	0.58208
26	Cer(d17:1/24:0)	-0.0064136	-0.0202342	0.00740703	0.362566	0.640364
27	Cer(d17:1/24:1)	-0.0012203	-0.0148468	0.0124062	0.860488	0.955337
28	Cer(d18:1/14:0)	-0.0208415	-0.0349994	-0.0066836	0.00396699	0.0632132
29	Cer(d18:1/16:0)	0.00225701	-0.0114998	0.0160138	0.747471	0.907581
30	Cer(d18:1/17:0)	0.0142342	6.23704e-05	0.0284061	0.0490029	0.236558
31	Cer(d18:1/18:0)	0.00172749	-0.0121678	0.0156228	0.807242	0.937731
32	Cer(d18:1/19:0)	-0.0064224	-0.0206416	0.00779684	0.375515	0.650715
33	Cer(d18:1/20:0)	0.000812948	-0.0130863	0.0147122	0.908614	0.976733
34	Cer(d18:1/21:0)	-0.00861328	-0.0229533	0.00572671	0.238699	0.517652
35	Cer(d18:1/22:0)	0.000851579	-0.0128684	0.0145716	0.903047	0.976733
36	Cer(d18:1/23:0)	-0.00156178	-0.0151582	0.0120346	0.821645	0.946151
37	Cer(d18:1/24:0)	0.00194826	-0.0115096	0.0154062	0.776328	0.919303
38	Cer(d18:1/24:1)	0.00588683	-0.00740336	0.019177	0.384802	0.659018
39	Cer(d18:1/26:0)	-0.011533	-0.0259257	0.00285969	0.116117	0.373421
40	Cer(d18:2/14:0)	-0.00587661	-0.0195272	0.00777402	0.398291	0.670886
41	Cer(d18:2/16:0)	0.0054921	-0.00806524	0.0190494	0.426692	0.697431
42	Cer(d18:2/17:0)	-0.00456875	-0.0188048	0.00966732	0.528855	0.783133
43	Cer(d18:2/18:0)	0.00877444	-0.00504253	0.0225914	0.212891	0.488409
44	Cer(d18:2/20:0)	0.0013066	-0.0124575	0.0150707	0.85221	0.955337
45	Cer(d18:2/21:0)	0.00411895	-0.0095061	0.017744	0.55303	0.802715
46	Cer(d18:2/22:0)	0.00682522	-0.00657962	0.0202301	0.317835	0.602297
47	Cer(d18:2/23:0)	0.00505816	-0.00843902	0.0185553	0.462128	0.730042
48	Cer(d18:2/24:0)	0.00370964	-0.00985684	0.0172761	0.591548	0.828296
49	Cer(d18:2/24:1)	0.0100376	-0.00298573	0.0230609	0.130678	0.394185
50	Cer(d18:2/26:0)	-0.00146644	-0.0156611	0.0127283	0.839333	0.95061
51	Cer(d19:1/16:0)	0.00236623	-0.0116319	0.0163644	0.740088	0.904141
52	Cer(d19:1/18:0)	0.00977254	-0.00396809	0.0235132	0.163056	0.441603
53	Cer(d19:1/20:0)	0.00345222	-0.0108444	0.0177488	0.635595	0.844006
54	Cer(d19:1/22:0)	0.00964407	-0.00395927	0.0232474	0.164398	0.441603
55	Cer(d19:1/23:0)	-5.72774e-05	-0.0136558	0.0135412	0.993404	0.996798
56	Cer(d19:1/24:0)	0.00697264	-0.00651541	0.0204607	0.310493	0.599782
57	Cer(d19:1/24:1)	0.00874258	-0.004491	0.0219762	0.195048	0.476567
58	Cer(d19:1/26:0)	0.00085232	-0.0135096	0.0152143	0.907281	0.976733
59	Cer(d20:1/22:0)	-0.00413871	-0.0178934	0.00961595	0.554885	0.803816
60	Cer(d20:1/23:0)	-0.0138891	-0.0279603	0.000181968	0.0530291	0.236558
61	Cer(d20:1/24:0)	-0.00400731	-0.0178379	0.00982331	0.569645	0.820334
62	Cer(d20:1/24:1)	0.00215504	-0.0110683	0.0153783	0.749095	0.907581
63	Cer(d20:1/26:0)	-0.0112958	-0.0248548	0.00226319	0.102368	0.353943
64	Cer(m18:0/20:0)	-0.00282417	-0.0163599	0.0107116	0.682204	0.868922
65	Cer(m18:0/22:0)	-0.00469954	-0.0182816	0.00888254	0.497163	0.758557
66	Cer(m18:0/23:0)	-0.00504851	-0.0184263	0.00832927	0.459001	0.727446
67	Cer(m18:0/24:0)	-0.00283504	-0.0165043	0.0108342	0.683995	0.868922
68	Cer(m18:0/24:1)	0.00227663	-0.0111049	0.0156581	0.738467	0.903667
69	Cer(m18:1/18:0)	0.00334553	-0.00989597	0.016587	0.620028	0.840075
70	Cer(m18:1/20:0)	0.00152448	-0.0119181	0.0149671	0.823875	0.946151
71	Cer(m18:1/22:0)	-0.00216859	-0.0158638	0.0115266	0.755987	0.913613
72	Cer(m18:1/23:0)	-4.94544e-05	-0.0136752	0.0135763	0.994317	0.996798
73	Cer(m18:1/24:0)	-0.00334978	-0.0171929	0.0104934	0.634882	0.844006
74	Cer(m18:1/24:1)	0.00717758	-0.00584083	0.020196	0.279428	0.570531
75	Cer1P(d18:1/16:0)	-0.00255411	-0.0163088	0.0112006	0.715551	0.89049
76	HexCer(d16:1/18:0)	-0.00943144	-0.0233165	0.00445362	0.182776	0.46519
77	HexCer(d16:1/20:0)	0.000149145	-0.0136391	0.0139374	0.983063	0.996798
78	HexCer(d16:1/22:0)	-0.00423695	-0.0179217	0.00944777	0.543482	0.797472
79	HexCer(d16:1/24:0)	-0.00147631	-0.0153588	0.0124062	0.834681	0.947091
80	HexCer(d18:1/16:0)	-0.0121674	-0.026162	0.00182731	0.0882693	0.325133
81	HexCer(d18:1/18:0)	-0.00359802	-0.0172516	0.0100556	0.605064	0.833669
82	HexCer(d18:1/20:0)	0.00199541	-0.0117013	0.0156921	0.774948	0.919303
83	HexCer(d18:1/22:0)	0.0001017	-0.0139217	0.0141251	0.988644	0.996798
84	HexCer(d18:1/24:0)	-0.00542693	-0.0195329	0.00867903	0.450308	0.720354
85	HexCer(d18:1/24:1)	0.00515984	-0.00893009	0.0192498	0.472401	0.741477
86	HexCer(d18:2/18:0)	0.00234073	-0.010854	0.0155355	0.727734	0.897362
87	HexCer(d18:2/20:0)	0.0013098	-0.0124009	0.0150205	0.851281	0.955337
88	HexCer(d18:2/22:0)	0.00586194	-0.00792615	0.01965	0.404183	0.676345
89	HexCer(d18:2/24:0)	-0.00110939	-0.015283	0.0130642	0.877915	0.96333
90	Hex2Cer(d16:1/16:0)	-0.00178694	-0.0152239	0.01165	0.794102	0.928888
91	Hex2Cer(d16:1/24:1)	0.00863479	-0.00499579	0.0222654	0.214017	0.488409
92	Hex2Cer(d18:1/16:0)	-0.00231527	-0.0156654	0.0110349	0.733596	0.899731
93	Hex2Cer(d18:1/18:0)	0.00174856	-0.0119622	0.0154593	0.802368	0.935641
94	Hex2Cer(d18:1/20:0)	0.006792	-0.00730902	0.020893	0.344653	0.626202
95	Hex2Cer(d18:1/22:0)	0.00609252	-0.00804197	0.020227	0.397701	0.670886
96	Hex2Cer(d18:1/24:0)	0.000170001	-0.0139379	0.0142779	0.981133	0.996798
97	Hex2Cer(d18:1/24:1)	0.0144686	0.000497469	0.0284397	0.0424015	0.223599
98	Hex2Cer(d18:2/16:0)	0.00267522	-0.0105033	0.0158538	0.690353	0.875483
99	Hex2Cer(d18:2/24:1)	0.0171589	0.00358424	0.0307336	0.0133044	0.120397
100	Hex3Cer(d18:1/16:0)	0.00363741	-0.00997557	0.0172504	0.600035	0.828296
101	Hex3Cer(d18:1/18:0)	-0.011505	-0.025251	0.00224106	0.100782	0.350109
102	Hex3Cer(d18:1/20:0)	-0.00459949	-0.0182151	0.00901615	0.507412	0.766873
103	Hex3Cer(d18:1/22:0)	0.00620379	-0.0076186	0.0200262	0.378531	0.652402
104	Hex3Cer(d18:1/24:0)	-0.00380155	-0.0177042	0.0101011	0.59155	0.828296
105	Hex3Cer(d18:1/24:1)	0.0151425	0.00131766	0.0289673	0.0318568	0.194354
106	GM3(d18:1/16:0)	0.00699116	-0.00699635	0.0209787	0.326794	0.612633
107	GM3(d18:1/18:0)	0.00337226	-0.0102698	0.0170144	0.627607	0.842557
108	GM3(d18:1/20:0)	0.0107267	-0.00337662	0.0248299	0.13582	0.40306
109	GM3(d18:1/22:0)	0.00916401	-0.00462104	0.0229491	0.192266	0.473769
110	GM3(d18:1/24:0)	0.0080849	-0.00577057	0.0219404	0.252345	0.527715
111	GM3(d18:1/24:1)	0.0144326	0.00066099	0.0282041	0.0399981	0.220047
112	GM1(d18:1/16:0)	0.000620079	-0.0130979	0.0143381	0.929311	0.987282
113	Sulfatide (d18:1:/16:0(OH))	-0.0139577	-0.0279185	3.16622e-06	0.0500518	0.236558
114	Sulfatide (d18:1:/16:0)	-0.00870936	-0.0223932	0.00497445	0.211868	0.488409
115	Sulfatide (d18:1:/24:0(OH))	0.00302211	-0.0115018	0.017546	0.683021	0.868922
116	Sulfatide (d18:1:/24:0)	-0.00527198	-0.0192572	0.00871323	0.459492	0.727446
117	Sulfatide (d18:1:/24:1(OH))	-0.00976378	-0.0233184	0.0037908	0.157737	0.433084
118	Sulfatide (d18:1:/24:1)	-0.00220414	-0.0156676	0.0112593	0.747993	0.907581
119	SM(34:3)	0.0130707	-0.000201548	0.026343	0.0535725	0.236558
120	SM(35:2) (b)	-0.00302505	-0.0164984	0.0104483	0.659499	0.857114
121	SM(37:1)	-3.4602e-05	-0.0135341	0.0134649	0.995986	0.996798
122	SM(37:2)	0.00766434	-0.00552581	0.0208545	0.254342	0.528137
123	SM(38:3) (a)	-0.00669658	-0.0206877	0.00729452	0.3477	0.626202
124	SM(38:3) (b)	0.00350888	-0.0101891	0.0172069	0.615184	0.83816
125	SM(40:3) (a)	-0.00479	-0.0185646	0.00898461	0.495014	0.758557
126	SM(40:3) (b)	-0.000161063	-0.013599	0.0132768	0.981233	0.996798
127	SM(41:0)	-0.0015025	-0.0153137	0.0123087	0.830936	0.946836
128	SM(41:1) (a)	0.00150479	-0.0113581	0.0143676	0.81841	0.946151
129	SM(43:1)	0.00031793	-0.012604	0.0132399	0.961488	0.996758
130	SM(43:2) (b)	0.00363102	-0.00995689	0.0172189	0.600003	0.828296
131	SM(43:2) (c)	0.00288934	-0.0104217	0.0162004	0.670127	0.86632
132	SM(44:1)	-0.00719963	-0.0212006	0.00680136	0.313051	0.602274
133	SM(44:2)	0.00255328	-0.0115665	0.016673	0.722683	0.894808
134	SM(44:3)	-0.00682392	-0.0208692	0.00722135	0.34048	0.626202
135	SM(d16:1/19:0)	0.00698788	-0.00641515	0.0203909	0.306381	0.599782
136	SM(d16:1/23:0)/SM(d17:1/22:0)	-0.00205479	-0.0156163	0.0115067	0.766198	0.917685
137	SM(d16:1/24:1)	0.00483436	-0.00850041	0.0181691	0.476849	0.745267
138	SM(d17:1/14:0)	-0.00914717	-0.0222842	0.0039899	0.172055	0.452031
139	SM(d17:1/16:0)	-0.00796947	-0.0214424	0.00550347	0.245906	0.523935
140	SM(d17:1/24:1)	0.00637579	-0.0068522	0.0196038	0.344327	0.626202
141	SM(d18:0/14:0)	-0.0037266	-0.0175835	0.0101303	0.597671	0.828296
142	SM(d18:0/16:0)	-0.0035454	-0.0178314	0.0107406	0.626247	0.842557
143	SM(d18:0/22:0)	-0.00696535	-0.0209837	0.00705298	0.329645	0.615581
144	SM(d18:1/14:0/SM(d16:1/16:0)	-0.00302064	-0.0162374	0.0101961	0.653789	0.852717
145	SM(d18:1/16:0)	-7.01994e-05	-0.0133751	0.0132347	0.991738	0.996798
146	SM(d18:1/17:0)/SM(d17:1/18:0)	3.14378e-05	-0.0136299	0.0136928	0.996397	0.996798
147	SM(d18:1/18:0/SM(d16:1/20:0)	0.00310492	-0.0103265	0.0165364	0.650081	0.851718
148	SM(d18:1/20:0)/SM(d16:1/22:0)	0.00203229	-0.0113416	0.0154061	0.765534	0.917685
149	SM(d18:1/22:0)/SM(d16:1/24:0)	4.62769e-05	-0.0135316	0.0136242	0.994663	0.996798
150	SM(d18:1/23:0)/SM(d17:1/24:0)	-0.00561414	-0.0193043	0.008076	0.421027	0.691957
151	SM(d18:1/24:0)	-0.00186245	-0.0157092	0.0119843	0.791806	0.92863
152	SM(d18:1/24:1)	0.00694631	-0.00646184	0.0203545	0.309451	0.599782
153	SM(d18:2/14:0)	0.00607126	-0.00727673	0.0194192	0.37217	0.647982
154	SM(d18:2/16:0)	0.00562698	-0.00767842	0.0189324	0.406657	0.677454
155	SM(d18:2/17:0)	0.00723673	-0.00618083	0.0206543	0.290012	0.579233
156	SM(d18:2/18:0)	0.00447469	-0.00918321	0.0181326	0.520292	0.77515
157	SM(d18:2/18:1)	0.00685444	-0.00652501	0.0202339	0.314852	0.602297
158	SM(d18:2/20:0)	0.0061644	-0.00778192	0.0201107	0.385807	0.659191
159	SM(d18:2/22:0)	0.00854567	-0.00497971	0.0220711	0.21522	0.488409
160	SM(d18:2/23:0)	-0.000254172	-0.0139011	0.0133927	0.970842	0.996798
161	SM(d18:2/24:0)	0.000640653	-0.0131381	0.0144194	0.927293	0.987282
162	SM(d19:1/24:1)	0.0105349	-0.00307204	0.0241418	0.128947	0.391905
163	PA(34:1)	0.00424389	-0.00962195	0.0181097	0.548104	0.801917
164	PA(36:1)	0.00694537	-0.00704432	0.020935	0.330045	0.615581
165	PA(36:2)	-0.00498225	-0.0190649	0.0091004	0.487548	0.751605
166	PA(36:3)	-0.00215494	-0.0160202	0.0117103	0.760357	0.915175
167	PA(36:4)	-0.00187979	-0.0158323	0.0120727	0.791468	0.92863
168	PA(40:6)	-0.000327593	-0.0140982	0.013443	0.962762	0.996758
169	PC(14:0_16:0)	-0.00571684	-0.0190179	0.00758418	0.399054	0.670886
170	PC(14:0_20:4)	-0.0081189	-0.0215611	0.00532332	0.236102	0.515068
171	PC(14:0_22:6)	-0.0216156	-0.0349779	-0.00825335	0.00155721	0.034009
172	PC(15-MHDA_18:1)	0.016551	0.00352638	0.0295756	0.0128249	0.118995
173	PC(15-MHDA_18:2)	-0.00237337	-0.0160814	0.0113347	0.734024	0.899731
174	PC(15-MHDA_20:4)	0.0102578	-0.00287508	0.0233906	0.125603	0.390114
175	PC(15-MHDA_22:6)	0.000104523	-0.012341	0.0125501	0.98685	0.996798
176	PC(15:0_20:3)	-0.00379808	-0.0172768	0.00968061	0.58029	0.825187
177	PC(15:0_20:4)	0.00361047	-0.00974223	0.0169632	0.595688	0.828296
178	PC(15:0_22:6)	-0.00542036	-0.0184738	0.00763304	0.41521	0.684563
179	PC(16:0_16:0)	-0.00275046	-0.0160118	0.0105109	0.683992	0.868922
180	PC(16:0_18:0)	0.00264882	-0.0106734	0.015971	0.696396	0.880193
181	PC(16:0_18:1)	0.0105608	-0.00289753	0.0240192	0.123859	0.38952
182	PC(16:0_18:2)	-0.00733664	-0.0208227	0.0061494	0.285859	0.577231
183	PC(16:0_18:3) (a)	-0.00930082	-0.0227561	0.00415447	0.175182	0.456968
184	PC(16:0_18:3) (b)	-0.0107954	-0.024175	0.00258424	0.113619	0.373421
185	PC(16:0_20:3) (a)	0.00322942	-0.0104599	0.0169188	0.6434	0.849751
186	PC(16:0_20:3) (b)	0.00664598	-0.00714334	0.0204353	0.344354	0.626202
187	PC(16:0_20:4)	0.0149588	0.0010752	0.0288425	0.0347464	0.207066
188	PC(16:0_20:5)	-0.0193339	-0.0329574	-0.0057104	0.0054732	0.0771511
189	PC(16:0_22:6)	-0.00804791	-0.0214723	0.00537652	0.239599	0.517725
190	PC(16:1_18:2)	-0.00954835	-0.0228044	0.00370767	0.157753	0.433084
191	PC(16:1_20:4)	0.00468811	-0.00841598	0.0177922	0.482675	0.75117
192	PC(16:1_22:6)	-0.009008	-0.0224814	0.00446544	0.189742	0.473064
193	PC(17:0_18:1)	0.0103764	-0.00293244	0.0236853	0.126288	0.390587
194	PC(17:0_18:2)	-0.00244482	-0.0162624	0.0113728	0.728418	0.897362
195	PC(17:0_20:4)	0.00876248	-0.0045764	0.0221014	0.197573	0.478019
196	PC(17:0_22:6)	-0.00335747	-0.0159182	0.00920329	0.599903	0.828296
197	PC(17:1_18:2)	-0.0125446	-0.0258631	0.000773958	0.0648423	0.271186
198	PC(18:0_18:1)	0.0108836	-0.00266919	0.0244365	0.115327	0.373421
199	PC(18:0_18:2)	-0.0127185	-0.0261482	0.000711185	0.063393	0.270157
200	PC(18:0_20:3)	0.00151552	-0.0124941	0.0155252	0.831872	0.946836
201	PC(18:0_20:4)	0.0125657	-0.00134247	0.0264739	0.0765255	0.298368
202	PC(18:0_22:4)	0.0166342	0.00331071	0.0299576	0.0144778	0.127237
203	PC(18:0_22:5) (n3)	0.00865585	-0.0041212	0.0214329	0.183935	0.466437
204	PC(18:0_22:5) (n6)	0.0153187	0.00140786	0.0292296	0.0309499	0.192259
205	PC(18:0_22:6)	-0.00302496	-0.0161171	0.0100672	0.650245	0.851718
206	PC(18:1_18:1)	0.00914188	-0.00420395	0.0224877	0.179104	0.46379
207	PC(18:1_18:2)	-0.00520951	-0.0186872	0.00826823	0.448191	0.718872
208	PC(18:1_20:3)	0.000709106	-0.0128217	0.01424	0.918081	0.982414
209	PC(18:1_22:6) (a)	-0.0136564	-0.0274708	0.000158056	0.0526723	0.236558
210	PC(18:1_22:6) (b)	-0.0113505	-0.0247766	0.00207559	0.0974	0.344689
211	PC(18:2_18:2)	-0.0189473	-0.0322084	-0.00568634	0.00516511	0.0761416
212	PC(18:2_20:5)	-0.0205444	-0.0339374	-0.00715133	0.00268968	0.0480862
213	PC(20:0_20:4)	0.00290985	-0.0109408	0.0167605	0.680129	0.868922
214	PC(28:0)	-0.012927	-0.0261766	0.000322645	0.0558303	0.243593
215	PC(31:0) (a)	0.00527131	-0.00789512	0.0184377	0.432123	0.700765
216	PC(31:0) (b)	-0.00305655	-0.016306	0.0101929	0.650752	0.851718
217	PC(32:1)	0.00324462	-0.0100605	0.0165497	0.632253	0.842621
218	PC(32:2)	-0.0103681	-0.0237387	0.00300245	0.128349	0.391905
219	PC(33:0) (a)	0.0161072	0.00346222	0.0287522	0.0126116	0.118995
220	PC(33:0) (b)	0.000925484	-0.0125389	0.0143899	0.892693	0.971868
221	PC(33:1)	0.00717846	-0.00609762	0.0204545	0.288799	0.578388
222	PC(33:2)	-0.0122852	-0.0257628	0.00119237	0.0739431	0.291399
223	PC(34:5)	-0.0206136	-0.0343731	-0.00685408	0.0033736	0.0549522
224	PC(35:5)	-0.0204768	-0.033981	-0.00697269	0.00300842	0.0517299
225	PC(36:6) (a)	-0.0187781	-0.0322735	-0.00528265	0.00645348	0.0862311
226	PC(38:2)	-0.00320739	-0.0171581	0.0107433	0.651861	0.851718
227	PC(38:4) (b)	0.0181545	0.00481161	0.0314974	0.00772737	0.0960027
228	PC(38:5) (a)	0.0160391	0.00283498	0.0292433	0.0173465	0.133842
229	PC(38:5) (b)	0.00350221	-0.010147	0.0171515	0.614597	0.83816
230	PC(38:6) (a)	-0.0135047	-0.0267906	-0.000218852	0.0463533	0.234324
231	PC(38:7)(c)	-0.000173691	-0.0134877	0.0131403	0.979574	0.996798
232	PC(39:5)(a)	-0.00533962	-0.0182092	0.00752993	0.415594	0.684563
233	PC(39:5)(b)	0.0102302	-0.0025379	0.0229983	0.116153	0.373421
234	PC(40:10)	0.00206223	-0.0113257	0.0154502	0.762425	0.91616
235	PC(40:7) (a)	-0.00534936	-0.0184438	0.00774503	0.422799	0.693314
236	PC(40:8)	0.000433487	-0.0127183	0.0135852	0.948423	0.990305
237	PC(44:12)	-0.0174244	-0.030891	-0.00395768	0.0112861	0.114899
238	PC(O-16:0/16:0)	-0.00266728	-0.0162035	0.0108689	0.698979	0.880459
239	PC(O-16:0/20:3)	-0.003717	-0.0174845	0.0100505	0.596245	0.828296
240	PC(O-16:0/20:4)	0.00153903	-0.0119172	0.0149953	0.822399	0.946151
241	PC(O-16:0/22:6)	-0.0114228	-0.0249509	0.00210541	0.0978109	0.344689
242	PC(O-18:0/18:1)	0.0103223	-0.00335838	0.0240029	0.138962	0.406083
243	PC(O-18:0/18:2)	-0.00491307	-0.0187921	0.00896596	0.487296	0.751605
244	PC(O-18:0/20:4)	0.00687492	-0.00665299	0.0204028	0.318746	0.602297
245	PC(O-18:0/22:6)	-0.0118946	-0.0252838	0.00149462	0.0815677	0.309788
246	PC(O-18:1/18:1)	0.0104378	-0.00281055	0.0236861	0.122359	0.388266
247	PC(O-18:1/18:2)	-0.0093298	-0.0229685	0.00430889	0.179695	0.46379
248	PC(O-32:1)	-0.00725413	-0.021244	0.00673577	0.309021	0.599782
249	PC(O-32:2)	-0.0072699	-0.0202862	0.00574643	0.273219	0.559411
250	PC(O-34:1)	0.00813273	-0.00537785	0.0216433	0.237681	0.516974
251	PC(O-34:2)	-0.0219369	-0.0357648	-0.00810902	0.0019149	0.0379358
252	PC(O-34:4)	0.00846069	-0.00398723	0.0209086	0.182495	0.46519
253	PC(O-35:4)	-0.00139047	-0.014939	0.0121581	0.840376	0.95061
254	PC(O-36:0)	-2.84879e-05	-0.0139612	0.0139042	0.996798	0.996798
255	PC(O-36:5)	-0.0173139	-0.0309314	-0.00369649	0.0127753	0.118995
256	PC(O-38:5)	0.0130722	-0.000197313	0.0263417	0.053496	0.236558
257	PC(O-40:5)	0.00971253	-0.00355172	0.0229768	0.150993	0.42422
258	PC(O-40:7) (a)	-0.000569076	-0.0139347	0.0127965	0.933405	0.987282
259	PC(O-40:7) (b)	0.00849491	-0.0054088	0.0223986	0.230724	0.50787
260	PC(P-15:0/20:4) (a)	-0.00089827	-0.0147946	0.012998	0.89905	0.975919
261	PC(P-15:0/20:4) (b)	-0.0149689	-0.0286746	-0.00126334	0.0323482	0.194354
262	PC(P-16:0/14:0)	-0.00613777	-0.0193869	0.00711134	0.363394	0.640364
263	PC(P-16:0/16:0)	-0.00842784	-0.0219072	0.00505152	0.220034	0.491722
264	PC(P-16:0/16:1)	-0.00175524	-0.0149841	0.0114736	0.79456	0.928888
265	PC(P-16:0/18:0)	-0.000292191	-0.0136092	0.0130248	0.965653	0.996798
266	PC(P-16:0/18:1)	0.00417429	-0.00924722	0.0175958	0.541657	0.797472
267	PC(P-16:0/18:2)	-0.0196692	-0.0332184	-0.00611998	0.00449587	0.0701164
268	PC(P-16:0/18:3)	-0.0143346	-0.0282463	-0.000422841	0.0434486	0.224281
269	PC(P-16:0/20:4)	-0.000921363	-0.0144461	0.0126033	0.893642	0.971868
270	PC(P-16:0/20:5)	-0.0174388	-0.0308752	-0.00400243	0.0110378	0.114899
271	PC(P-16:0/22:6)	-0.0142676	-0.0277163	-0.000818908	0.0376207	0.214683
272	PC(P-17:0/20:4) (a)	0.000970356	-0.0125266	0.0144673	0.887794	0.969825
273	PC(P-17:0/20:4) (b)	-0.00867728	-0.0222993	0.00494471	0.211486	0.488409
274	PC(P-18:0/18:2)	-0.00953773	-0.0231487	0.00407322	0.169333	0.446479
275	PC(P-18:0/20:4)	0.00388531	-0.00967237	0.017443	0.573869	0.821573
276	PC(P-18:0/22:5)	-0.00321943	-0.0168219	0.010383	0.642313	0.849751
277	PC(P-18:0/22:6)	-0.00880905	-0.0222414	0.00462333	0.198328	0.478019
278	PC(P-18:1/18:1)	0.0174599	0.00425004	0.0306698	0.00965373	0.108284
279	PC(P-18:1/22:6)	-0.00323502	-0.0164956	0.0100256	0.632121	0.842621
280	PC(P-20:0/20:4)	0.00450684	-0.00895531	0.017969	0.511228	0.768099
281	PC(P-35:2)(a)	-0.0119971	-0.0257293	0.00173508	0.0867387	0.321109
282	PC(P-35:2)(b)	-0.0175625	-0.0318062	-0.00331878	0.0157364	0.132583
283	PC(P-36:3)	-0.00888191	-0.0226575	0.00489367	0.205986	0.487906
284	PC(P-38:5) (a)	0.00123845	-0.0121997	0.0146765	0.856472	0.955337
285	PC(P-38:5) (b)	0.00746242	-0.005618	0.0205428	0.26307	0.544718
286	LPC(14:0) [sn1]	-0.00476629	-0.0183849	0.00885234	0.492239	0.756417
287	LPC(14:0) [sn2]	-0.00459507	-0.0184224	0.00923228	0.514337	0.769407
288	LPC(15-MHDA) [sn1] [104_sn1]	0.0137233	0.000952071	0.0264945	0.0352352	0.208285
289	LPC(15-MHDA) [sn1] / LPC(17:0) [sn2]	0.0148242	0.0019813	0.027667	0.0237383	0.167309
290	LPC(15-MHDA) [sn2]	0.0180377	0.00549906	0.0305763	0.00486912	0.0743556
291	LPC(15:0) [sn1]	0.00792238	-0.0055945	0.0214393	0.250245	0.527477
292	LPC(15:0) [sn2]	0.00814958	-0.00529602	0.0215952	0.234456	0.513003
293	LPC(16:0) [sn1]	0.00862474	-0.00469601	0.0219455	0.204089	0.487287
294	LPC(16:0) [sn2]	0.00885158	-0.00447382	0.022177	0.19261	0.473769
295	LPC(16:1) [sn1]	0.0137861	-1.27649e-05	0.0275849	0.0502117	0.236558
296	LPC(16:1) [sn2]	0.0105813	-0.00331046	0.0244731	0.135247	0.402991
297	LPC(17:0) [sn1]	0.00575902	-0.00722074	0.0187388	0.384001	0.659018
298	LPC(17:1) (a) [sn1] [104_sn1]	0.013307	-0.000329613	0.0269436	0.0557852	0.243593
299	LPC(17:1) [sn1] (a) / LPC(17:1) [sn2] (b)	0.0160779	0.00247311	0.0296827	0.0206109	0.152604
300	LPC(17:1) [sn1] (b)	-0.00268709	-0.0162053	0.0108311	0.696469	0.880193
301	LPC(17:1) [sn2] (a)	0.0168491	0.0030835	0.0306148	0.0165111	0.132996
302	LPC(18:0) [sn1]	0.006308	-0.00676491	0.0193809	0.343795	0.626202
303	LPC(18:0) [sn2]	0.00975812	-0.00339131	0.0229075	0.145574	0.416078
304	LPC(18:1) [sn1]	0.0138274	0.000884065	0.0267708	0.0363096	0.21123
305	LPC(18:1) [sn2]	0.0160657	0.00288252	0.0292489	0.0169873	0.133842
306	LPC(18:2) [sn1]	-0.00845596	-0.0215947	0.0046828	0.206808	0.487906
307	LPC(18:2) [sn2]	-0.00803477	-0.0211592	0.00508963	0.229795	0.507349
308	LPC(18:3) (a) [sn1] [104_sn1]	-0.0144558	-0.0280935	-0.000818194	0.0377819	0.214683
309	LPC(18:3) [sn1] (a)/LPC(18:3) [sn2] (b)	-0.011504	-0.0247728	0.0017649	0.0891635	0.326784
310	LPC(18:3) [sn1] (b)	-0.0097734	-0.0233029	0.00375612	0.156562	0.433058
311	LPC(18:3) [sn2] (a)	-0.0109844	-0.0244769	0.00250803	0.110411	0.371243
312	LPC(19:0) (a) [sn1] [104_sn1]	0.00661455	-0.0052165	0.0184456	0.272736	0.559411
313	LPC(19:0) [sn1] (a) / LPC(19:0) [sn2] (b)	0.00583042	-0.00629888	0.0179597	0.345633	0.626202
314	LPC(19:0) [sn1] (b)	0.00495046	-0.00766393	0.0175648	0.441275	0.714028
315	LPC(19:0) [sn2] (a)	0.00765676	-0.00416604	0.0194796	0.203977	0.487287
316	LPC(19:1) (a)	0.0139181	0.00052626	0.0273099	0.0416732	0.223599
317	LPC(19:1) (b)	0.0187351	0.00522794	0.0322422	0.00662249	0.0866837
318	LPC(19:1) (c)	0.00103072	-0.0129832	0.0150446	0.885228	0.968466
319	LPC(20:0) [sn1]	0.00187266	-0.0115733	0.0153186	0.784603	0.926109
320	LPC(20:0) [sn2]	0.00611292	-0.00695638	0.0191822	0.358783	0.63832
321	LPC(20:1) [sn1]	0.0152538	0.00163103	0.0288765	0.0282432	0.183206
322	LPC(20:1) [sn2]	0.0205285	0.00697803	0.034079	0.00303463	0.0517299
323	LPC(20:2) [sn1]	-0.00329222	-0.016731	0.0101466	0.630695	0.842621
324	LPC(20:2) [sn2]	-0.00707297	-0.020592	0.00644607	0.304697	0.598775
325	LPC(20:3) [sn1]	0.00308739	-0.0102635	0.0164383	0.649965	0.851718
326	LPC(20:3) [sn2]	0.00283334	-0.010688	0.0163547	0.680909	0.868922
327	LPC(20:4) [sn1]	0.0166395	0.00329773	0.0299814	0.0145811	0.127237
328	LPC(20:4) [sn2]	0.0184108	0.00505926	0.0317624	0.00694582	0.0893208
329	LPC(20:5) [sn1]	-0.0111074	-0.0248083	0.00259348	0.111907	0.372855
330	LPC(20:5) [sn2]	-0.0129194	-0.0266498	0.000811026	0.0651143	0.271186
331	LPC(22:0) [sn1]	-0.0133986	-0.0267825	-1.47557e-05	0.0497486	0.236558
332	LPC(22:0) [sn2]	0.000538887	-0.0130515	0.0141293	0.937972	0.98876
333	LPC(22:1) [sn1]	0.0151846	0.0017328	0.0286365	0.0269919	0.181903
334	LPC(22:1) [sn2]	0.0235111	0.0102169	0.0368053	0.000547161	0.0200535
335	LPC(22:4) [sn1]	0.0215392	0.00831173	0.0347667	0.00144953	0.034009
336	LPC(22:4) [sn2]	0.0222525	0.00863028	0.0358747	0.00139998	0.034009
337	LPC(22:5) (n3) [sn1] [104_sn1]	0.012162	-0.00117946	0.0255034	0.0739227	0.291399
338	LPC(22:5) [sn1] (n3)/LPC(22:5) [sn2] (n6)	0.0159359	0.00266701	0.0292048	0.0186459	0.140902
339	LPC(22:5) [sn1] (n6)	0.0153071	0.00170359	0.0289106	0.0274795	0.182647
340	LPC(22:5) [sn2] (n3)	0.0125107	-0.000908822	0.0259302	0.067618	0.275356
341	LPC(22:6) [sn1]	-0.0008355	-0.0145915	0.0129205	0.905117	0.976733
342	LPC(22:6) [sn2]	-0.00120367	-0.0150867	0.0126793	0.864889	0.955337
343	LPC(24:0) [sn1]	-0.0141359	-0.0276972	-0.000574598	0.0410748	0.223021
344	LPC(24:0) [sn2]	-0.00351493	-0.01719	0.0101601	0.613981	0.83816
345	LPC(26:0) [sn1]	-0.00798037	-0.0216877	0.00572696	0.253418	0.527715
346	LPC(26:0) [sn2]	-0.0122195	-0.0260664	0.00162752	0.0836117	0.315914
347	LPC(O-16:0)	0.00771207	-0.00603724	0.0214614	0.271178	0.558352
348	LPC(O-18:0)	0.00598954	-0.00765526	0.0196343	0.389089	0.661723
349	LPC(O-18:1)	0.0158578	0.00218183	0.0295337	0.0231096	0.16446
350	LPC(O-20:0)	-0.00239752	-0.015489	0.010694	0.719297	0.892926
351	LPC(O-20:1)	0.00649564	-0.00673319	0.0197245	0.33537	0.620774
352	LPC(O-22:0)	-0.00137858	-0.0142734	0.0115162	0.833813	0.947091
353	LPC(O-22:1)	0.00859321	-0.00416105	0.0213475	0.18634	0.467763
354	LPC(O-24:0)	-0.00708414	-0.0200296	0.0058613	0.283025	0.573087
355	LPC(O-24:1)	0.00795423	-0.00448534	0.0203938	0.209754	0.488409
356	LPC(O-24:2)	-0.0282978	-0.0409557	-0.0156398	1.30828e-05	0.00319657
357	LPC(P-16:0)	0.00371159	-0.00968475	0.0171079	0.586653	0.828296
358	LPC(P-17:0) (a)	0.00816635	-0.00504262	0.0213753	0.225235	0.500294
359	LPC(P-17:0) (b)	0.00452668	-0.00887029	0.0179237	0.507313	0.766873
360	LPC(P-18:0)	0.00362781	-0.00957973	0.0168354	0.589874	0.828296
361	LPC(P-18:1)	0.0185455	0.00541866	0.0316724	0.00568563	0.0786333
362	LPC(P-20:0)	0.00316715	-0.0103307	0.016665	0.645183	0.850574
363	PE(15-MHDA_18:1)	0.00826069	-0.00491229	0.0214337	0.218671	0.491189
364	PE(15-MHDA_18:2)	0.000165331	-0.0129158	0.0132464	0.980211	0.996798
365	PE(15-MHDA_20:4)	0.0110063	-0.00193687	0.0239495	0.095459	0.341324
366	PE(15-MHDA_22:6)	0.0126046	0.000655274	0.0245539	0.0387214	0.216662
367	PE(16:0_16:0)	0.00411099	-0.00946807	0.0176901	0.552456	0.802715
368	PE(16:0_16:1)	0.000160366	-0.013307	0.0136277	0.981355	0.996798
369	PE(16:0_18:1)	0.00343904	-0.0101315	0.0170095	0.618969	0.840075
370	PE(16:0_18:2)	-0.00614039	-0.0195114	0.00723058	0.367577	0.641509
371	PE(16:0_18:3) (a)	-0.00605594	-0.0194188	0.00730689	0.373908	0.649465
372	PE(16:0_18:3) (b)	-0.00689494	-0.0204538	0.00666395	0.318445	0.602297
373	PE(16:0_20:3)	-0.000119052	-0.0135001	0.013262	0.986069	0.996798
374	PE(16:0_20:4)	0.00797084	-0.00552423	0.0214659	0.2466	0.523935
375	PE(16:0_20:5)	-0.0101817	-0.0238088	0.00344535	0.142844	0.412224
376	PE(16:0_22:6)	0.00057569	-0.0125824	0.0137338	0.931574	0.987282
377	PE(16:1_18:2)	-0.00609153	-0.019614	0.0074309	0.376777	0.651363
378	PE(16:1_20:4)	0.00844701	-0.00502343	0.0219174	0.218683	0.491189
379	PE(17:0_18:1)	0.00691191	-0.00647015	0.020294	0.310909	0.599782
380	PE(17:0_18:2)	-0.00114714	-0.0144108	0.0121165	0.865218	0.955337
381	PE(17:0_20:4)	0.00799245	-0.00500553	0.0209904	0.22775	0.504354
382	PE(17:0_22:6)	0.00457822	-0.00812325	0.0172797	0.479392	0.747648
383	PE(18:0_18:1)	0.00983359	-0.00351781	0.023185	0.148618	0.422237
384	PE(18:0_18:2)	0.00159956	-0.0117607	0.0149598	0.814237	0.94436
385	PE(18:0_20:3) (a)	0.00758672	-0.00544023	0.0206137	0.253265	0.527715
386	PE(18:0_20:3) (b)	0.0181319	0.0041387	0.032125	0.0111687	0.114899
387	PE(18:0_20:4)	0.0209646	0.00768256	0.0342466	0.00201804	0.0389269
388	PE(18:0_22:4)	0.0123426	-0.00100146	0.0256867	0.0697983	0.282664
389	PE(18:0_22:5) (n3)	0.0144016	0.00142207	0.0273811	0.0297023	0.18932
390	PE(18:0_22:5) (n6)	0.0202729	0.00708048	0.0334653	0.00264283	0.0480862
391	PE(18:0_22:6)	0.0110007	-0.00180757	0.023809	0.0921916	0.334537
392	PE(18:1_18:1)	0.00832792	-0.00538329	0.0220391	0.233481	0.5124
393	PE(18:1_18:2)	-0.00566218	-0.0192945	0.00797018	0.415095	0.684563
394	PE(18:1_22:6) (a)	-0.00378532	-0.0172402	0.00966959	0.580895	0.825187
395	PE(18:1_22:6) (b)	-0.00424908	-0.0174846	0.00898645	0.528716	0.783133
396	PE(20:0_20:4)	0.00356221	-0.0101627	0.0172872	0.610526	0.83816
397	PE(36:0)	0.000109799	-0.0138728	0.0140924	0.987704	0.996798
398	PE(38:5) (a)	0.00885299	-0.00460512	0.0223111	0.196957	0.478019
399	PE(38:5) (b)	0.0116723	-0.00158171	0.0249264	0.0842434	0.316669
400	PE(O-16:0/18:2)	-0.00650681	-0.020086	0.00707236	0.347152	0.626202
401	PE(O-16:0/20:3)	0.0062938	-0.00678659	0.0193742	0.345158	0.626202
402	PE(O-16:0/20:4)	0.00326878	-0.0100292	0.0165667	0.629535	0.842621
403	PE(O-16:0/22:4)	0.0120927	-0.00134949	0.0255349	0.0777919	0.300113
404	PE(O-16:0/22:6)	-0.0112848	-0.024916	0.00234646	0.104535	0.359737
405	PE(O-18:0/20:4)	0.0101115	-0.00296364	0.0231867	0.129387	0.391905
406	PE(O-18:0/22:5)	0.0131248	0.000586665	0.025663	0.0402269	0.220047
407	PE(O-18:0/22:6)	-0.00342838	-0.0171799	0.0103231	0.624668	0.842557
408	PE(O-18:1/18:2)	-0.0132461	-0.0272939	0.00080169	0.064547	0.271186
409	PE(O-18:1/22:6)	-0.0020878	-0.0153754	0.0111998	0.757813	0.913613
410	PE(O-34:1)	0.00634189	-0.00733494	0.0200187	0.362942	0.640364
411	PE(O-36:5)	-0.00740875	-0.0209205	0.00610303	0.282071	0.572736
412	PE(O-38:5) (a)	0.00701559	-0.00671744	0.0207486	0.316228	0.602297
413	PE(O-38:5) (b)	-0.0002565	-0.0141064	0.0135934	0.971006	0.996798
414	PE(P-15:0/20:4) (a)	-0.00423597	-0.0164956	0.00802365	0.49777	0.758557
415	PE(P-15:0/20:4) (b)	-0.0120792	-0.0261806	0.00202216	0.0930558	0.334686
416	PE(P-15:0/22:6) (a)	0.00262205	-0.0110424	0.0162865	0.70649	0.884732
417	PE(P-15:0/22:6) (b)	0.0138635	-0.000105589	0.0278326	0.0517524	0.236558
418	PE(P-16:0/18:1)	0.00430413	-0.00983018	0.0184384	0.550134	0.802715
419	PE(P-16:0/18:2)	-0.0221509	-0.0358605	-0.00844128	0.0015775	0.034009
420	PE(P-16:0/18:3)	-0.00522918	-0.0193154	0.00885706	0.466355	0.734514
421	PE(P-16:0/20:3) (a)	-0.0102309	-0.0240279	0.00356619	0.145883	0.416078
422	PE(P-16:0/20:3) (b)	-0.0139537	-0.0280766	0.000169092	0.0527994	0.236558
423	PE(P-16:0/20:4)	-0.000179404	-0.0141203	0.0137615	0.979851	0.996798
424	PE(P-16:0/20:5)	-0.0182316	-0.0318019	-0.0046614	0.00852802	0.102476
425	PE(P-16:0/22:4)	-0.000420462	-0.0145205	0.0136796	0.953332	0.994015
426	PE(P-16:0/22:5) (n3)	-0.00570624	-0.0192944	0.00788194	0.409957	0.681403
427	PE(P-16:0/22:5) (n6)	0.00663054	-0.00739305	0.0206541	0.353589	0.635246
428	PE(P-16:0/22:6)	-0.0106031	-0.0240816	0.00287538	0.122923	0.388372
429	PE(P-17:0/20:4) (a)	-0.00147978	-0.0150307	0.0120711	0.830303	0.946836
430	PE(P-17:0/20:4) (b)	-0.00373454	-0.0174288	0.00995966	0.592541	0.828296
431	PE(P-17:0/22:6) (a)	-0.0108417	-0.0245581	0.0028747	0.121151	0.386485
432	PE(P-17:0/22:6) (b)	-0.0139012	-0.0276135	-0.00018897	0.0469333	0.235005
433	PE(P-18:0/18:1)	0.00385946	-0.0101759	0.0178949	0.589464	0.828296
434	PE(P-18:0/18:2)	-0.0161504	-0.0299406	-0.00236012	0.0217748	0.15648
435	PE(P-18:0/18:3)	-0.0069764	-0.0211659	0.00721314	0.334745	0.620774
436	PE(P-18:0/20:3) (a)	-0.00970624	-0.0231199	0.00370737	0.155856	0.432737
437	PE(P-18:0/20:3) (b)	-0.00897898	-0.0225337	0.0045757	0.193842	0.475204
438	PE(P-18:0/20:4)	0.00138884	-0.0126023	0.01538	0.84554	0.953447
439	PE(P-18:0/20:5)	-0.0138976	-0.0274056	-0.000389567	0.0437652	0.224335
440	PE(P-18:0/22:4)	0.0004721	-0.0136055	0.0145497	0.947525	0.990305
441	PE(P-18:0/22:5) (n3)	-0.00370984	-0.0175623	0.0101427	0.599204	0.828296
442	PE(P-18:0/22:5) (n6)	0.0094083	-0.00459252	0.0234091	0.187498	0.469064
443	PE(P-18:0/22:6)	-0.00966625	-0.0233624	0.0040299	0.1663	0.442905
444	PE(P-18:1/18:1)	0.0118201	-0.00215932	0.0257995	0.0973486	0.344689
445	PE(P-18:1/18:1) (a)	0.0126731	-0.00126118	0.0266073	0.0745902	0.292378
446	PE(P-18:1/18:1) (b)	0.00482435	-0.00922196	0.0188707	0.500338	0.760888
447	PE(P-18:1/18:2) (a)	-0.0113041	-0.0253217	0.00271357	0.113814	0.373421
448	PE(P-18:1/18:2) (b)	-0.0115373	-0.0255536	0.00247908	0.106529	0.36319
449	PE(P-18:1/18:3)	0.000872801	-0.0137083	0.0154539	0.906483	0.976733
450	PE(P-18:1/20:3) (a)	0.00328217	-0.0103743	0.0169386	0.637182	0.844583
451	PE(P-18:1/20:3) (b)	0.00257113	-0.0115023	0.0166445	0.719945	0.892926
452	PE(P-18:1/20:4) (a)	0.00988451	-0.00406039	0.0238294	0.164471	0.441603
453	PE(P-18:1/20:4) (b)	-0.00294342	-0.0169494	0.0110626	0.680034	0.868922
454	PE(P-18:1/20:5) (a)	-0.00934695	-0.02306	0.00436607	0.181261	0.464972
455	PE(P-18:1/20:5) (b)	-0.0141945	-0.027685	-0.0007041	0.0392108	0.217739
456	PE(P-18:1/22:4)	0.0074088	-0.00667024	0.0214878	0.301895	0.594863
457	PE(P-18:1/22:5) (a)	0.00528705	-0.00852727	0.0191014	0.45267	0.72132
458	PE(P-18:1/22:5) (b)	0.0176556	0.00376231	0.0315489	0.0128211	0.118995
459	PE(P-18:1/22:6) (a)	0.000600725	-0.012501	0.0137024	0.928299	0.987282
460	PE(P-18:1/22:6) (b)	-0.00464135	-0.0184391	0.00915643	0.509205	0.767999
461	PE(P-19:0/20:4) (a)	0.0011263	-0.0112124	0.013465	0.857824	0.955337
462	PE(P-19:0/20:4) (b)	-0.00107812	-0.0135675	0.0114113	0.865473	0.955337
463	PE(P-20:0/18:1)	-0.00114696	-0.0145585	0.0122646	0.866711	0.955337
464	PE(P-20:0/18:2)	-0.01803	-0.0313689	-0.00469108	0.00813632	0.0993987
465	PE(P-20:0/20:4)	0.00118704	-0.012453	0.0148271	0.864387	0.955337
466	PE(P-20:0/22:6)	-0.00269077	-0.0156144	0.0102328	0.682838	0.868922
467	PE(P-20:1/20:4)	0.0111752	-0.00187442	0.0242249	0.0931459	0.334686
468	PE(P-20:1/22:6)	0.00850831	-0.0046647	0.0216813	0.205192	0.487906
469	LPE(16:0) [sn1]	0.0150883	0.00171675	0.0284599	0.0270496	0.181903
470	LPE(16:0) [sn2]	0.0175889	0.00423813	0.0309397	0.00989046	0.108284
471	LPE(17:0) [sn1]	0.0212191	0.00712763	0.0353107	0.00321493	0.0535578
472	LPE(17:0) [sn2]	0.0245344	0.0103163	0.0387525	0.000742851	0.0217804
473	LPE(18:0) [sn1]	0.0215957	0.00827844	0.0349129	0.00151643	0.034009
474	LPE(18:0) [sn2]	0.0205643	0.00716511	0.0339635	0.00267628	0.0480862
475	LPE(18:1) [sn1]	0.0142546	0.000874372	0.0276348	0.0368275	0.212556
476	LPE(18:1) [sn2]	0.016931	0.00332938	0.0305327	0.0147709	0.127377
477	LPE(18:2) [sn1]	-0.0013306	-0.0148455	0.0121843	0.846786	0.953447
478	LPE(18:2) [sn2]	-0.00182751	-0.0153367	0.0116817	0.790634	0.92863
479	LPE(20:4) [sn1]	0.012968	-0.000597337	0.0265334	0.060948	0.261257
480	LPE(20:4) [sn2]	0.0171251	0.00368198	0.0305682	0.0126052	0.118995
481	LPE(22:6) [sn1]	0.00649032	-0.00731514	0.0202958	0.356329	0.636783
482	LPE(22:6) [sn2]	0.00884676	-0.0051137	0.0228072	0.213862	0.488409
483	LPE(P-16:0)	0.00498736	-0.00912368	0.0190984	0.487979	0.751605
484	LPE(P-18:0)	0.0109256	-0.00305669	0.0249079	0.125453	0.390114
485	LPE(P-18:1)	0.0165617	0.00242488	0.0306985	0.0217317	0.15648
486	LPE(P-20:0)	-0.00108162	-0.0150507	0.0128875	0.87922	0.96333
487	PI (38:5) (b)	-0.0110479	-0.0242364	0.00214056	0.100487	0.350109
488	PI(15-MHDA_20:4)\PI(17:0_20:4)	0.00756948	-0.00514557	0.0202845	0.242889	0.519059
489	PI(16:0_16:1)	0.0183534	0.00549981	0.031207	0.00519383	0.0761416
490	PI(16:0_20:3) (a)	-0.0060977	-0.0199191	0.00772373	0.386701	0.659191
491	PI(16:0_20:3) (b)	-0.000735927	-0.0147003	0.0132284	0.917624	0.982414
492	PI(16:0_20:4)	0.00822059	-0.0055466	0.0219878	0.24147	0.518306
493	PI(16:0/16:0)	0.00628192	-0.00610192	0.0186658	0.319637	0.602297
494	PI(17:0_18:1)	0.0115191	-0.000757237	0.0237955	0.0658623	0.271943
495	PI(17:0_18:2)	-0.00433588	-0.0168431	0.00817135	0.496344	0.758557
496	PI(18:0_18:1)	0.00562276	-0.00788805	0.0191336	0.414175	0.684563
497	PI(18:0_20:2)	-0.00352022	-0.0176026	0.0105622	0.623746	0.842557
498	PI(18:0_20:3) (a)	-0.00564384	-0.0196974	0.00840977	0.430706	0.700765
499	PI(18:0_20:3) (b)	0.00525865	-0.00843326	0.0189506	0.451081	0.720354
500	PI(18:0_20:4)	0.0138723	0.000418703	0.0273259	0.0433012	0.224281
501	PI(18:0_22:4)	0.00921061	-0.00440406	0.0228253	0.184539	0.466437
502	PI(18:0_22:5) (n3)	0.00549995	-0.00746113	0.018461	0.405069	0.676345
503	PI(18:0_22:5) (n6)	-0.0092654	-0.023409	0.00487822	0.198816	0.478019
504	PI(18:0_22:6)	-0.0102828	-0.0235578	0.00299218	0.128764	0.391905
505	PI(18:1_18:2)	-0.0170629	-0.0300156	-0.0041101	0.00989771	0.108284
506	PI(20:0_20:4)	-0.000287428	-0.0133566	0.0127818	0.965572	0.996798
507	PI(34:0)	-2.757e-05	-0.0125999	0.0125448	0.996566	0.996798
508	PI(34:1)	0.0102295	-0.00271655	0.0231755	0.121271	0.386485
509	PI(36:2)	-0.00719844	-0.0202941	0.0058972	0.280876	0.571894
510	PI(37:6)	-0.0104994	-0.0243749	0.00337604	0.137829	0.405737
511	PI(38:5) (a)	-0.00691522	-0.0200028	0.00617236	0.299924	0.592572
512	PI(38:6)	-0.00222641	-0.0155615	0.0111087	0.743173	0.906398
513	PI(39:6)	0.000603489	-0.0120979	0.0133049	0.925707	0.987282
514	PIP1(38:4)	0.00881353	-0.00537238	0.0229994	0.222961	0.496749
515	LPI(18:0) [sn1]	0.00311795	-0.0107409	0.0169768	0.658847	0.857114
516	LPI(18:0) [sn2]	-0.00276498	-0.0168408	0.0113108	0.69987	0.880459
517	LPI(18:1) [sn1]	0.00297904	-0.0104613	0.0164194	0.663583	0.860777
518	LPI(18:1) [sn2]	-0.00348493	-0.0171591	0.0101893	0.616988	0.839058
519	LPI(18:2) [sn1]	-0.0094217	-0.0225324	0.00368897	0.158721	0.434112
520	LPI(18:2) [sn2]	-0.00409106	-0.0175856	0.00940343	0.551905	0.802715
521	LPI(20:4) [sn1]	0.0127931	-0.000747782	0.026334	0.0640272	0.271186
522	LPI(20:4) [sn2]	0.0100136	-0.00367004	0.0236972	0.151238	0.42422
523	PS(36:1)	0.010349	-0.00340407	0.024102	0.140026	0.407299
524	PS(36:2)	0.000968122	-0.0128859	0.0148222	0.890917	0.971789
525	PS(38:3)	-0.00175919	-0.0155906	0.0120722	0.80289	0.935641
526	PS(38:4)	0.00655237	-0.00735759	0.0204623	0.35538	0.636783
527	PS(38:5)	0.0074873	-0.00643604	0.0214106	0.29144	0.580505
528	PS(40:5)	0.00398663	-0.00984385	0.0178171	0.571635	0.821573
529	PS(40:6)	0.00121796	-0.0124788	0.0149148	0.861461	0.955337
530	PG(34:1)	0.00465541	-0.00851956	0.0178304	0.488082	0.751605
531	PG(36:1)	0.00217832	-0.0110699	0.0154265	0.746937	0.907581
532	PG(36:2)	0.00808528	-0.0054172	0.0215878	0.240145	0.517725
533	CE(14:0)	-0.022195	-0.0353034	-0.00908652	0.000931565	0.026263
534	CE(15:0)	-0.015256	-0.0287307	-0.0017813	0.0265388	0.181803
535	CE(16:0)	-0.006292	-0.0199631	0.0073791	0.366527	0.641509
536	CE(16:1)	-0.00823837	-0.0212605	0.00478373	0.214625	0.488409
537	CE(16:2)	-0.0149844	-0.0270575	-0.0029114	0.0150626	0.128382
538	CE(17:0)	-0.00638503	-0.0199869	0.00721689	0.35705	0.636783
539	CE(17:1)	-0.0123659	-0.025837	0.00110526	0.0719349	0.288133
540	CE(18:0)	-0.0161267	-0.0292855	-0.00296782	0.0163764	0.132996
541	CE(18:1)	-0.006708	-0.0198232	0.00640721	0.315649	0.602297
542	CE(18:2)	-0.0153934	-0.0288954	-0.00189151	0.0255059	0.176376
543	CE(18:3)	-0.028844	-0.0422752	-0.0154128	2.7995e-05	0.00459773
544	CE(20:0)	-0.0101515	-0.0236922	0.0033892	0.141496	0.409946
545	CE(20:1)	-0.0128767	-0.0255378	-0.000215625	0.0462338	0.234324
546	CE(20:2)	-0.0219223	-0.0353273	-0.00851738	0.00138269	0.034009
547	CE(20:3)	-0.011193	-0.0250872	0.00270109	0.114182	0.373421
548	CE(20:4)	-0.0120289	-0.0252198	0.00116198	0.0738228	0.291399
549	CE(20:5)	-0.0232215	-0.0362145	-0.0102285	0.000477984	0.0198948
550	CE(22:0)	-0.0151081	-0.0288013	-0.00141488	0.0306289	0.192259
551	CE(22:1)	-0.0137579	-0.026601	-0.000914784	0.035803	0.209949
552	CE(22:4)	-0.0133025	-0.026722	0.000117086	0.0520273	0.236558
553	CE(22:5) (n3)	-0.02196	-0.0352944	-0.00862567	0.00127949	0.0334953
554	CE(22:5) (n6)	-0.000545894	-0.0141694	0.0130776	0.937319	0.98876
555	CE(22:6)	-0.0233325	-0.0367592	-0.00990581	0.000681498	0.0217804
556	CE(24:0)	-0.0115335	-0.0252326	0.00216558	0.0987866	0.346462
557	CE(24:1)	-0.0107378	-0.0238287	0.00235312	0.107758	0.363994
558	CE(24:4)	-0.0135542	-0.0266239	-0.000484585	0.0421101	0.223599
559	CE(24:5)	-0.022843	-0.0360452	-0.00964074	0.000718803	0.0217804
560	CE(24:6)	-0.0317187	-0.0444733	-0.0189641	1.29073e-06	0.000946104
561	COH	-0.00572636	-0.019102	0.00764928	0.400905	0.672457
562	DE(16:0)	-0.0126908	-0.0259051	0.000523605	0.0597687	0.257709
563	DE(18:1)	-0.0101819	-0.0233374	0.00297351	0.129074	0.391905
564	DE(18:2)	-0.0252603	-0.0387287	-0.0117919	0.000248504	0.0137881
565	DE(20:4)	-0.0125775	-0.0253449	0.000189873	0.0534965	0.236558
566	DE(20:5)	-0.0220981	-0.0354778	-0.00871852	0.00123892	0.0334953
567	DE(22:6)	-0.0257995	-0.039612	-0.011987	0.000263347	0.0137881
568	FA(14:0)	-0.00583641	-0.0184726	0.00679982	0.364824	0.641285
569	FA(15:0)	-0.0174319	-0.0312479	-0.00361589	0.013474	0.120445
570	FA(16:0)	0.00461601	-0.00783545	0.0170675	0.466963	0.734514
571	FA(16:1)	0.0149584	0.00254608	0.0273707	0.0182458	0.139315
572	FA(16:2)	-0.00872244	-0.0222968	0.0048519	0.207528	0.487906
573	FA(17:0)	-0.00203535	-0.0160446	0.0119739	0.775548	0.919303
574	FA(17:1)	0.0087611	-0.00461529	0.0221375	0.198903	0.478019
575	FA(18:0)	-0.0144043	-0.028361	-0.000447642	0.043109	0.224281
576	FA(18:1)	0.0110476	-0.00097798	0.0230732	0.071712	0.288133
577	FA(18:2)	-0.00327698	-0.0151073	0.0085533	0.586735	0.828296
578	FA(18:3)	-0.00522098	-0.0172237	0.00678171	0.393399	0.66662
579	FA(20:2)	-0.00669636	-0.0196619	0.00626915	0.310938	0.599782
580	FA(20:3)	0.00232709	-0.0109755	0.0156297	0.731368	0.899485
581	FA(20:4)	0.00401434	-0.00952347	0.0175521	0.560643	0.808959
582	FA(20:5)	-0.0111136	-0.0247968	0.00256954	0.111245	0.372339
583	FA(22:4)	0.0211674	0.0089099	0.0334249	0.000735957	0.0217804
584	FA(22:5)	0.0109536	-0.00134788	0.023255	0.0808652	0.30872
585	FA(22:6)	-0.00588074	-0.018664	0.00690252	0.366742	0.641509
586	AC(12:0)	0.0163686	0.00403692	0.0287002	0.0093505	0.108182
587	AC(13:0)	-0.00397087	-0.0167675	0.00882579	0.54258	0.797472
588	AC(14:0)	0.00918573	-0.00348713	0.0218586	0.155159	0.432439
589	AC(14:1)	0.0278059	0.0156341	0.0399777	8.47799e-06	0.00310718
590	AC(14:2)	0.0165254	0.00353746	0.0295133	0.0127115	0.118995
591	AC(15:0) (a)	0.0164572	0.00416301	0.0287513	0.00876983	0.103682
592	AC(15:0) (b)	0.0125088	-0.000159082	0.0251767	0.0529394	0.236558
593	AC(16:0)	0.0161819	0.00301102	0.0293528	0.0161099	0.132681
594	AC(16:1)	0.0255835	0.0131257	0.0380413	6.12238e-05	0.00560963
595	AC(17:0) (a)	0.0204558	0.00766773	0.0332439	0.0017557	0.035748
596	AC(17:0) (b)	0.0116232	-0.0016059	0.0248522	0.084968	0.317763
597	AC(18:0)	0.00988232	-0.00340755	0.0231722	0.144761	0.416078
598	AC(18:1)	0.0207307	0.00778596	0.0336754	0.00173401	0.035748
599	AC(18:2)	-0.00250195	-0.0155785	0.0105746	0.707303	0.884732
600	DG(14:0_16:0)	-0.00300509	-0.0166096	0.0105994	0.664665	0.860777
601	DG(14:0_18:2)	-0.00819179	-0.0211947	0.00481109	0.216547	0.489905
602	DG(16:0_16:0)	0.00836177	-0.00483732	0.0215609	0.213999	0.488409
603	DG(16:0_16:1)	0.0131021	0.000125098	0.026079	0.0478377	0.236558
604	DG(16:0_18:1)	0.0129772	0.000104484	0.0258498	0.048174	0.236558
605	DG(16:0_18:2)	0.00229544	-0.0104895	0.0150803	0.724576	0.89564
606	DG(16:0_20:4)	0.0126063	2.96027e-06	0.0252096	0.0499464	0.236558
607	DG(16:0_22:5)	0.00970787	-0.00294284	0.0223586	0.132362	0.397629
608	DG(16:0_22:6)	-0.00153553	-0.0151548	0.0120837	0.824882	0.946151
609	DG(16:1_18:1)	0.0169151	0.00415456	0.0296757	0.00944565	0.108182
610	DG(18:0_18:1)	0.0111368	-0.00242211	0.0246958	0.10728	0.363994
611	DG(18:0_18:2)	0.00423565	-0.00929297	0.0177643	0.538967	0.796498
612	DG(18:0_20:4)	0.00462671	-0.00919807	0.0184515	0.511368	0.768099
613	DG(18:0_22:6)	-0.00756914	-0.0210327	0.00589445	0.27008	0.557658
614	DG(18:1_18:1)	0.00655805	-0.00705205	0.0201681	0.344468	0.626202
615	DG(18:1_18:2)	0.000741819	-0.0126355	0.0141191	0.913337	0.980199
616	DG(18:1_18:3)	-0.00478733	-0.0183318	0.00875713	0.487959	0.751605
617	DG(18:1_20:3)	0.0164681	0.0034663	0.02947	0.0131194	0.120207
618	DG(18:1_20:4)	0.0153796	0.00288043	0.0278788	0.0159526	0.132681
619	DG(18:1_20:5)	-0.00364262	-0.0169625	0.0096773	0.591508	0.828296
620	DG(18:1_22:5)	0.0153709	0.00254947	0.0281924	0.0188576	0.141047
621	DG(18:1_22:6)	-0.00152139	-0.0154538	0.012411	0.830309	0.946836
622	DG(18:2_18:2)	-0.00823189	-0.0222822	0.00581842	0.250425	0.527477
623	DG(18:2_20:4)	0.000807355	-0.0118054	0.0134201	0.900029	0.975919
624	DG(18:2_22:6)	-0.00946033	-0.0231212	0.00420058	0.17439	0.456528
625	TG(48:0) [NL-16:0]	0.00839677	-0.004675	0.0214685	0.207676	0.487906
626	TG(48:0) [NL-18:0]	-6.11245e-05	-0.0132616	0.0131394	0.992749	0.996798
627	TG(48:1) [NL-16:1]	0.0167515	0.00395607	0.029547	0.0103616	0.111692
628	TG(48:1) [NL-18:1]	0.000561146	-0.0120087	0.013131	0.930184	0.987282
629	TG(48:2) [NL-14:0]	0.0023663	-0.00969739	0.01443	0.700283	0.880459
630	TG(48:2) [NL-14:1]	0.00467268	-0.00813883	0.0174842	0.474195	0.742703
631	TG(48:2) [NL-16:1]	0.0133298	0.000723758	0.0259358	0.0382497	0.215669
632	TG(48:2) [NL-18:2]	-0.00902232	-0.0212951	0.00325048	0.149376	0.422751
633	TG(48:3) [NL-14:0]	-0.00391386	-0.0159285	0.00810077	0.522673	0.777118
634	TG(48:3) [NL-16:1]	0.0099126	-0.00245279	0.022278	0.115967	0.373421
635	TG(48:3) [NL-18:3]	-0.0102807	-0.0222094	0.00164815	0.0910777	0.332139
636	TG(49:1) [NL-16:1]	0.00881744	-0.00424983	0.0218847	0.185674	0.467695
637	TG(49:1) [NL-17:1]	0.00819076	-0.00477103	0.0211526	0.215154	0.488409
638	TG(50:0) [NL-18:0]	0.012485	-0.000441443	0.0254114	0.0583315	0.253
639	TG(50:1) [NL-14:0]	0.00894325	-0.0040661	0.0219526	0.177557	0.461523
640	TG(50:1) [NL-16:0]	0.0143761	0.00181641	0.0269358	0.0249292	0.174029
641	TG(50:1) [NL-18:1]	0.0138376	0.0012717	0.0264035	0.0309503	0.192259
642	TG(50:2) [NL-14:0]	0.00176382	-0.0107474	0.014275	0.782031	0.924562
643	TG(50:2) [NL-16:1]	0.017347	0.0048761	0.0298178	0.00647027	0.0862311
644	TG(50:2) [NL-18:1]	0.0135583	0.00114731	0.0259693	0.0323062	0.194354
645	TG(50:2) [NL-18:2]	0.000726205	-0.0117119	0.0131643	0.908774	0.976733
646	TG(50:3) [NL-14:0]	-0.0057788	-0.0178158	0.00625816	0.346236	0.626202
647	TG(50:3) [NL-14:1]	0.00797101	-0.00475257	0.0206946	0.219125	0.491189
648	TG(50:3) [NL-16:1]	0.0108854	-0.00126661	0.0230373	0.0790654	0.303429
649	TG(50:3) [NL-18:2]	0.00225544	-0.00967213	0.014183	0.710569	0.885794
650	TG(50:3) [NL-18:3]	-0.00142808	-0.0135648	0.0107087	0.817375	0.946151
651	TG(50:4) [NL-14:0]	-0.00821612	-0.0202745	0.00384228	0.181422	0.464972
652	TG(50:4) [NL-18:3]	-0.000292232	-0.0119622	0.0113777	0.960803	0.996758
653	TG(50:4) [NL-20:4]	0.00304635	-0.0087073	0.0148	0.61102	0.83816
654	TG(51:0) [NL-16:0]	0.0178822	0.00530606	0.0304584	0.00538351	0.0771511
655	TG(51:1) [NL-17:0]	0.0154549	0.00335122	0.0275586	0.0124002	0.118995
656	TG(51:2) [NL-15:0]	0.0116647	-0.000774902	0.0241044	0.066038	0.271943
657	TG(51:2) [NL-17:0]	0.0148788	0.0026843	0.0270733	0.016855	0.133842
658	TG(51:2) [NL-17:1]	0.0148311	0.00263643	0.0270258	0.01721	0.133842
659	TG(52:1) [NL-18:0]	0.023404	0.0107315	0.0360765	0.000308262	0.0141709
660	TG(52:1) [NL-18:1]	0.0222234	0.00954175	0.034905	0.000614115	0.0214355
661	TG(52:2) [NL-16:0]	0.0104618	-0.00220851	0.0231321	0.105445	0.361172
662	TG(52:2) [NL-18:2]	0.0110648	-0.00155744	0.0236871	0.0856775	0.31879
663	TG(52:3) [NL-16:1]	0.026706	0.0139401	0.0394718	4.46356e-05	0.00467399
664	TG(52:3) [NL-18:2]	0.00612319	-0.0061254	0.0183718	0.326701	0.612633
665	TG(52:4) [NL-16:1]	0.0072517	-0.00490216	0.0194056	0.241829	0.518306
666	TG(52:4) [NL-18:2]	-0.00360748	-0.0161641	0.00894919	0.572907	0.821573
667	TG(52:4) [NL-18:3]	-0.000439291	-0.0125512	0.0116726	0.943254	0.990305
668	TG(52:5) [NL-18:3]	-0.00178094	-0.0139124	0.0103505	0.773267	0.919303
669	TG(52:5) [NL-20:4]	0.0133682	0.00145496	0.0252815	0.0279079	0.182647
670	TG(52:5) [NL-20:5]	-0.00424588	-0.0171498	0.00865802	0.518495	0.774047
671	TG(53:2) [NL-17:1]	0.0268122	0.0141197	0.0395047	3.76349e-05	0.00459773
672	TG(53:2) [NL-18:1]	0.0232073	0.0109731	0.0354416	0.00021123	0.0129027
673	TG(54:0) [NL-18:0]	0.0239481	0.0104694	0.0374267	0.000515692	0.0198948
674	TG(54:1) [NL-18:1]	0.0269274	0.0136373	0.0402175	7.65457e-05	0.00623422
675	TG(54:2) [NL-18:0]	0.027466	0.0145828	0.0403492	3.19531e-05	0.00459773
676	TG(54:2) [NL-20:1]	0.0238634	0.0109389	0.036788	0.000309325	0.0141709
677	TG(54:3) [NL-18:1]	0.0233977	0.0102703	0.0365251	0.00049517	0.0198948
678	TG(54:3) [NL-18:2]	0.0128657	0.000163581	0.0255678	0.0471293	0.235005
679	TG(54:4) [NL-18:2]	0.00866961	-0.0043325	0.0216717	0.190929	0.473769
680	TG(54:4) [NL-20:3]	0.016062	0.00366047	0.0284635	0.0112062	0.114899
681	TG(54:5) [NL-18:3]	0.0039839	-0.00889936	0.0168672	0.543978	0.797472
682	TG(54:5) [NL-20:4]	0.013668	0.00136376	0.0259721	0.0295159	0.18932
683	TG(54:6) [NL-18:3]	-0.00481014	-0.0175454	0.0079251	0.458617	0.727446
684	TG(54:6) [NL-20:4]	0.00860203	-0.00359975	0.0208038	0.166769	0.442905
685	TG(54:6) [NL-20:5]	-0.000344786	-0.0131416	0.012452	0.95783	0.996758
686	TG(54:6) [NL-22:6]	-0.00742072	-0.0211156	0.00627416	0.287772	0.577909
687	TG(54:7) [NL-20:5]	-0.000479759	-0.0132557	0.0122962	0.941251	0.989867
688	TG(54:7) [NL-22:6]	-0.000326953	-0.0136933	0.0130394	0.961711	0.996758
689	TG(56:6) [NL-20:4]	0.0244513	0.0119901	0.0369125	0.000127396	0.00922075
690	TG(56:6) [NL-22:5](a)	0.0100445	-0.00277257	0.0228617	0.124349	0.38952
691	TG(56:6) [NL-22:5](b)	0.00974891	-0.00304944	0.0225473	0.135229	0.402991
692	TG(56:7) [NL-20:4]	0.0135837	0.00121763	0.0259498	0.0313687	0.193221
693	TG(56:7) [NL-20:5]	0.00912807	-0.00384954	0.0221057	0.16774	0.443874
694	TG(56:7) [NL-22:5](a)	0.0049109	-0.00779084	0.0176126	0.448068	0.718872
695	TG(56:7) [NL-22:5](b)	0.00491543	-0.00778302	0.0176139	0.447532	0.718872
696	TG(56:7) [NL-22:6]	-0.00202228	-0.0157106	0.0116661	0.771865	0.919303
697	TG(56:8) [NL-20:4]	0.00793298	-0.00450998	0.0203759	0.211097	0.488409
698	TG(56:8) [NL-20:5]	-0.000152146	-0.0129823	0.012678	0.981433	0.996798
699	TG(56:8) [NL-22:6]	-0.0062141	-0.0196289	0.00720069	0.363426	0.640364
700	TG(56:9) [NL-22:6]	-0.00721067	-0.0205144	0.00609306	0.287645	0.577909
701	TG(58:10) [NL-22:6]	-0.00537672	-0.0186642	0.00791075	0.427212	0.697431
702	TG(58:8) [NL-22:6]	0.00418034	-0.00976129	0.018122	0.556266	0.804227
703	TG(58:9) [NL-22:6]	-0.00211197	-0.0155146	0.0112906	0.757132	0.913613
704	TG(O-50:1) [NL-15:0]	-0.0027558	-0.0169643	0.0114527	0.70348	0.882964
705	TG(O-50:1) [NL-16:0]	0.0106609	-0.00263074	0.0239526	0.115769	0.373421
706	TG(O-50:1) [NL-17:1]	-0.00382722	-0.0173055	0.00965105	0.577377	0.824985
707	TG(O-50:1) [NL-18:1]	0.00446055	-0.00890786	0.017829	0.512635	0.768429
708	TG(O-50:2) [NL-16:1]	-0.000501958	-0.0146318	0.0136279	0.944417	0.990305
709	TG(O-50:2) [NL-18:1]	0.00802133	-0.00570485	0.0217475	0.251643	0.527715
710	TG(O-50:2) [NL-18:2]	-0.00143973	-0.0156349	0.0127554	0.842225	0.951234
711	TG(O-50:3) [NL-18:2]	0.00131075	-0.0132817	0.0159032	0.860071	0.955337
712	TG(O-52:0) [NL-16:0]	0.00960243	-0.00312716	0.022332	0.139054	0.406083
713	TG(O-52:1) [NL-16:0]	0.00942346	-0.0039309	0.0227778	0.16637	0.442905
714	TG(O-52:1) [NL-18:1]	0.0057888	-0.00753023	0.0191078	0.393788	0.66662
715	TG(O-52:2) [NL-16:0]	0.0134388	-0.000133131	0.0270108	0.052284	0.236558
716	TG(O-52:2) [NL-17:1]	0.0135632	-7.5151e-05	0.0272016	0.0512724	0.236558
717	TG(O-52:2) [NL-18:1]	0.0156456	0.00237498	0.0289161	0.0209137	0.153297
718	TG(O-54:2) [NL-17:1]	0.00119807	-0.0127451	0.0151412	0.866086	0.955337
719	TG(O-54:2) [NL-18:1]	0.0150676	0.0016556	0.0284796	0.0277259	0.182647
720	TG(O-54:3) [NL-17:1]	0.00267155	-0.0114181	0.0167612	0.709815	0.885794
721	TG(O-54:3) [NL-18:1]	0.0186921	0.00502088	0.0323634	0.00743507	0.093964
722	TG(O-54:4) [NL-17:1]	0.0125946	-0.00139218	0.0265814	0.0775099	0.300113
723	TG(O-54:4) [NL-18:2]	0.0107207	-0.00341987	0.0248612	0.137071	0.405134
724	Ubiquinone	0.00699335	-0.00677754	0.0207643	0.319095	0.602297
725	CE(18:2) [+OH]	-0.0133379	-0.0276396	0.000963792	0.06752	0.275356
726	CE(20:4) [+OH]	-0.0135856	-0.0272951	0.00012384	0.0521001	0.236558
727	CE(22:6) [+OH]	-0.0272911	-0.0412748	-0.0133075	0.000138374	0.00922075
728	LPC(18:2) [+OH]	-0.00390215	-0.0177466	0.00994235	0.580194	0.825187
729	LPC(20:4) [+OH]	0.0138269	0.000501782	0.027152	0.0419956	0.223599
730	LPC(22:6) [+OH]	0.00191301	-0.0120275	0.0158535	0.787691	0.92826
731	PC(34:2) [+OH]	-0.00739544	-0.0216518	0.00686091	0.308815	0.599782
732	PC(36:4) [+OH]	-0.00148635	-0.0146819	0.0117092	0.825045	0.946151
733	PC(38:6) [+OH]	0.00920946	-0.00375068	0.0221696	0.16342	0.441603

## Sheet: Supp 3
Supp 3. Causal mediation for cord lipids mediating the effect of maternl pre-pregnancy BMI on infant birth weight
		ACME				ADE				Total effects			Proportion mediated
#	Lipid	Beta	95% CI (Lower)	95% CI (Upper)	p value	Beta	95% CI (Lower)	95% CI (Upper)	p value	Beta	95% CI (Lower)	95% CI (Upper)	Beta	95% CI (Lower)	95% CI (Upper)	p value
473	LPE(18:0) [sn1]	0.0018864	0.000637615	0.00350633	0.0008	0.0103607	0.00465367	0.0162915	0.0002	0.0122471	0.00622985	0.0184588	0.154028	0.0520625	0.286299	0.0008
474	LPE(18:0) [sn2]	0.00193488	0.000660289	0.00359754	0.002	0.0103122	0.00451372	0.016154	0.0002	0.0122471	0.00624915	0.018327	0.157987	0.0539139	0.293746	0.002
336	LPC(22:4) [sn2]	0.00219811	0.000715607	0.00395321	0.0024	0.010049	0.00423817	0.0160973	0.001	0.0122471	0.00628001	0.018422	0.17948	0.0584307	0.322787	0.0024
672	TG(53:2) [NL-18:1]	-0.00140396	-0.00280871	-0.000357624	0.0028	0.0136511	0.0077344	0.0195872	0	0.0122471	0.00629541	0.018284	-0.114636	-0.229337	-0.0292007	0.0028
586	AC(12:0)	-0.00133329	-0.00266619	-0.000354527	0.0028	0.0135804	0.00754412	0.0195874	0	0.0122471	0.00636171	0.0181816	-0.108866	-0.2177	-0.0289478	0.003
505	PI(18:1_18:2)	0.001507	0.000377804	0.00302874	0.0032	0.0107401	0.00486644	0.0166728	0.001	0.0122471	0.00638999	0.0181815	0.123049	0.0308484	0.247302	0.0034
543	CE(18:3)	-0.00191782	-0.00364152	-0.000541221	0.0036	0.0141649	0.00843412	0.0199833	0	0.0122471	0.00637706	0.018012	-0.156594	-0.297337	-0.0441918	0.0036
470	LPE(16:0) [sn2]	0.00201362	0.000594622	0.00375735	0.004	0.0102335	0.00451162	0.0159891	0.0008	0.0122471	0.00635287	0.018207	0.164416	0.048552	0.306795	0.0044
278	PC(P-18:1/18:1)	0.0023111	0.000634926	0.00420184	0.0064	0.00993601	0.00410299	0.0159735	0.0004	0.0122471	0.00632339	0.0182132	0.188706	0.0518429	0.343088	0.0064
334	LPC(22:1) [sn2]	0.00193433	0.000532181	0.00365308	0.008	0.0103128	0.0047096	0.0161071	0.0006	0.0122471	0.00639703	0.0182142	0.157941	0.0434536	0.298281	0.008
546	CE(20:2)	-0.00129462	-0.00264923	-0.000294866	0.0084	0.0135417	0.00748691	0.019518	0	0.0122471	0.00615934	0.0181528	-0.105708	-0.216315	-0.0240763	0.0084
322	LPC(20:1) [sn2]	0.00221955	0.000592128	0.00406991	0.0092	0.0100276	0.00451369	0.0157086	0.0008	0.0122471	0.00634116	0.0183172	0.181231	0.0483484	0.332316	0.0096
669	TG(52:5) [NL-20:4]	-0.00139772	-0.00304467	-0.000259032	0.0098	0.0136448	0.00795806	0.0195387	0	0.0122471	0.00628276	0.0182296	-0.114127	-0.248603	-0.0211504	0.0098
335	LPC(22:4) [sn1]	0.00205816	0.000512873	0.00389387	0.0102	0.0101889	0.00429829	0.016239	0.0006	0.0122471	0.00633724	0.0183178	0.168053	0.041877	0.317942	0.01
564	DE(18:2)	-0.000997962	-0.0021379	-0.000177806	0.0104	0.0132451	0.00726401	0.0192371	0	0.0122471	0.00633552	0.0182387	-0.0814855	-0.174564	-0.0145182	0.0104
589	AC(14:1)	-0.0014237	-0.0028629	-0.00028353	0.011	0.0136708	0.00766939	0.0199174	0	0.0122471	0.00644203	0.0182164	-0.116247	-0.233761	-0.0231507	0.011
655	TG(51:1) [NL-17:0]	-0.000954204	-0.00216757	-0.000134154	0.0132	0.0132013	0.00731631	0.0192363	0	0.0122471	0.00638713	0.018376	-0.0779126	-0.176986	-0.010954	0.0132
469	LPE(16:0) [sn1]	0.00182321	0.000399063	0.00349253	0.0136	0.0104239	0.00468824	0.0163782	0	0.0122471	0.00636841	0.018341	0.148869	0.0325843	0.285172	0.0136
485	LPE(P-18:1)	0.00138361	0.000257109	0.00276099	0.014	0.0108635	0.00517159	0.0167866	0.0002	0.0122471	0.00638059	0.0182468	0.112975	0.0209934	0.22544	0.014
361	LPC(P-18:1)	0.00129206	0.000210447	0.00264166	0.0144	0.010955	0.00535088	0.0166966	0.0002	0.0122471	0.00638738	0.0181901	0.105499	0.0171834	0.215697	0.0144
99	Hex2Cer(d18:2/24:1)	0.000967361	0.000125889	0.0021653	0.0168	0.0112797	0.00553244	0.0172209	0	0.0122471	0.00643745	0.0183134	0.0789869	0.0102791	0.176801	0.0168
692	TG(56:7) [NL-20:4]	-0.00122155	-0.0027765	-0.000167256	0.0176	0.0134687	0.00773967	0.0194075	0	0.0122471	0.0063683	0.0182365	-0.0997418	-0.226706	-0.0136567	0.0176
119	SM(34:3)	0.000848106	0.000118144	0.00185637	0.0178	0.011399	0.00552771	0.0172536	0.0002	0.0122471	0.00634641	0.0181869	0.0692495	0.00964672	0.151576	0.0178
657	TG(51:2) [NL-17:0]	-0.000817693	-0.00200531	-7.22538e-05	0.022	0.0130648	0.00715614	0.0190032	0	0.0122471	0.00634196	0.0181999	-0.0667662	-0.163737	-0.00589966	0.022
567	DE(22:6)	-0.00096695	-0.00225086	-9.46782e-05	0.0228	0.0132141	0.00739305	0.0191424	0	0.0122471	0.00635742	0.0181813	-0.0789533	-0.183787	-0.00773066	0.0228
417	PE(P-15:0/22:6) (b)	0.00185073	0.000248381	0.00373436	0.0228	0.0103964	0.00471944	0.0161775	0.0004	0.0122471	0.00646619	0.0181646	0.151116	0.0202808	0.304918	0.023
658	TG(51:2) [NL-17:1]	-0.000815921	-0.0019847	-6.61426e-05	0.0232	0.013063	0.00725364	0.0190156	0.0004	0.0122471	0.0063358	0.0182855	-0.0666215	-0.162054	-0.00540067	0.0232
305	LPC(18:1) [sn2]	0.00261774	0.000384214	0.00501135	0.0242	0.00962937	0.00406498	0.0152816	0.0008	0.0122471	0.0065104	0.0182813	0.213743	0.0313718	0.409186	0.024
321	LPC(20:1) [sn1]	0.00172487	0.000206716	0.003456	0.0244	0.0105222	0.0050571	0.0162657	0	0.0122471	0.00641565	0.0181588	0.140839	0.0168787	0.282189	0.0244
590	AC(14:2)	-0.00103238	-0.002296	-9.40697e-05	0.0258	0.0132795	0.00717097	0.0192687	0	0.0122471	0.0062974	0.0182039	-0.084296	-0.187473	-0.00768097	0.0258
328	LPC(20:4) [sn2]	0.00124745	0.000137882	0.00262516	0.028	0.0109997	0.00516472	0.0169675	0	0.0122471	0.006352	0.0182741	0.101857	0.0112584	0.214349	0.028
301	LPC(17:1) [sn2] (a)	0.00182203	0.000194386	0.00364335	0.0292	0.0104251	0.00444117	0.0163287	0.0006	0.0122471	0.00622088	0.0183018	0.148772	0.015872	0.297486	0.0292
480	LPE(20:4) [sn2]	0.00190878	0.000182819	0.00368999	0.0294	0.0103383	0.00432616	0.0165391	0.0006	0.0122471	0.00632041	0.0183633	0.155856	0.0149275	0.301294	0.0294
403	PE(O-16:0/22:4)	0.000851257	7.10624e-05	0.00193961	0.0298	0.0113959	0.00551476	0.0172963	0	0.0122471	0.00625925	0.018262	0.0695068	0.00580238	0.158372	0.0298
476	LPE(18:1) [sn2]	0.00245533	0.000233023	0.00476283	0.03	0.00979178	0.00402902	0.0155487	0.0026	0.0122471	0.00609809	0.0183372	0.200482	0.0190268	0.388894	0.0302
682	TG(54:5) [NL-20:4]	-0.00129235	-0.00290958	-0.000111969	0.0304	0.0135395	0.00792914	0.0192764	0	0.0122471	0.00646259	0.0181558	-0.105523	-0.237573	-0.00914245	0.0304
641	TG(50:1) [NL-18:1]	-0.000757462	-0.00186263	-4.89038e-05	0.0304	0.0130046	0.00716831	0.0189512	0.0002	0.0122471	0.00636588	0.018196	-0.0618482	-0.152087	-0.00399309	0.0306
640	TG(50:1) [NL-16:0]	-0.000698922	-0.00172151	-3.75362e-05	0.0306	0.012946	0.00701607	0.0189461	0	0.0122471	0.00624795	0.0183061	-0.0570683	-0.140564	-0.00306491	0.0308
338	LPC(22:5) [sn1] (n3)/LPC(22:5) [sn2] (n6)	0.00169013	0.000156756	0.00341191	0.031	0.010557	0.00474428	0.0166499	0.0006	0.0122471	0.00629432	0.0183592	0.138002	0.0127995	0.278589	0.0312
680	TG(54:4) [NL-20:3]	-0.000917954	-0.00223546	-5.38203e-05	0.0312	0.0131651	0.00738963	0.0192562	0	0.0122471	0.00634668	0.0183696	-0.0749527	-0.182529	-0.00439453	0.0312
333	LPC(22:1) [sn1]	0.00164536	0.00015712	0.00334783	0.0314	0.0106017	0.00511095	0.0163344	0	0.0122471	0.0064369	0.0182761	0.134347	0.0128292	0.273357	0.0314
299	LPC(17:1) [sn1] (a) / LPC(17:1) [sn2] (b)	0.00167783	0.000146045	0.00342296	0.0318	0.0105693	0.00479512	0.0164799	0.0006	0.0122471	0.00644809	0.0182229	0.136998	0.0119249	0.279491	0.0322
424	PE(P-16:0/20:5)	0.000693256	4.01978e-05	0.0015509	0.0332	0.0115539	0.00556873	0.0175778	0	0.0122471	0.00634479	0.0181936	0.0566057	0.00328223	0.126634	0.0332
662	TG(52:2) [NL-18:2]	-0.000841152	-0.00200225	-5.07008e-05	0.0334	0.0130883	0.00721589	0.0191757	0	0.0122471	0.00631095	0.0183754	-0.0686817	-0.163488	-0.00413982	0.0334
618	DG(18:1_20:4)	-0.00116788	-0.00268019	-6.54881e-05	0.0338	0.013415	0.00752078	0.0194117	0	0.0122471	0.00627045	0.0182459	-0.0953594	-0.218843	-0.00534723	0.0338
227	PC(38:4) (b)	0.000739292	3.55792e-05	0.00177508	0.0354	0.0115078	0.00564201	0.017547	0.0006	0.0122471	0.0063436	0.0181982	0.0603646	0.00290511	0.144939	0.0358
317	LPC(19:1) (b)	0.000961856	5.02038e-05	0.00220006	0.0358	0.0112853	0.00527974	0.0173539	0.0002	0.0122471	0.00621069	0.0183855	0.0785374	0.00409924	0.179639	0.036
489	PI(16:0_16:1)	0.000769723	4.55333e-05	0.00181122	0.0362	0.0114774	0.00559817	0.017429	0	0.0122471	0.00644205	0.018124	0.0628494	0.00371788	0.14789	0.0362
678	TG(54:3) [NL-18:2]	-0.000912367	-0.00210058	-4.94309e-05	0.0376	0.0131595	0.00726936	0.0191862	0	0.0122471	0.0063228	0.0182918	-0.0744965	-0.171517	-0.00403612	0.0376
648	TG(50:3) [NL-16:1]	-0.00104655	-0.0024282	-5.74165e-05	0.0378	0.0132937	0.0078253	0.0191763	0.0002	0.0122471	0.00658273	0.0183538	-0.0854528	-0.198267	-0.00468817	0.038
604	DG(16:0_18:1)	-0.000670719	-0.00167499	-2.02697e-05	0.0396	0.0129178	0.00708847	0.0189135	0	0.0122471	0.0063963	0.0182744	-0.0547655	-0.136766	-0.00165506	0.0396
484	LPE(P-18:0)	0.000817831	2.52506e-05	0.00194462	0.041	0.0114293	0.00557856	0.0173244	0.0004	0.0122471	0.00625348	0.0182635	0.0667774	0.00206176	0.158782	0.0414
327	LPC(20:4) [sn1]	0.001229	4.00952e-05	0.00258842	0.0416	0.0110181	0.00521022	0.0170141	0.0002	0.0122471	0.00633937	0.0183539	0.10035	0.00327385	0.21135	0.0416
729	LPC(20:4) [+OH]	0.000787023	1.93754e-05	0.001887	0.0418	0.0114601	0.00563335	0.0173873	0.0002	0.0122471	0.00626835	0.0182915	0.064262	0.00158204	0.154077	0.0418
390	PE(18:0_22:5) (n6)	0.000661435	1.48076e-05	0.00155845	0.0428	0.0115857	0.00565031	0.0174106	0	0.0122471	0.00637968	0.0180171	0.0540074	0.00120907	0.12725	0.0428
198	PC(18:0_18:1)	0.00119589	4.1089e-05	0.0026151	0.0432	0.0110512	0.00511615	0.0170025	0.0004	0.0122471	0.00630815	0.0181901	0.097647	0.00335499	0.213528	0.0434
458	PE(P-18:1/22:5) (b)	0.00113874	2.69663e-05	0.00247191	0.0444	0.0111084	0.00536162	0.016846	0.0004	0.0122471	0.00636289	0.0180737	0.0929803	0.00220185	0.201836	0.0444
204	PC(18:0_22:5) (n6)	0.00108515	4.9103e-06	0.00237861	0.0492	0.011162	0.00514344	0.0171411	0.0002	0.0122471	0.00623828	0.0181822	0.0886048	0.000400936	0.194218	0.0492
304	LPC(18:1) [sn1]	0.0024116	-1.456e-05	0.00495175	0.051	0.00983551	0.0045053	0.0153401	0.0002	0.0122471	0.00635118	0.0182185	0.196912	-0.00118885	0.40432	0.051
521	LPI(20:4) [sn1]	0.000979762	-2.55478e-06	0.00226384	0.0512	0.0112673	0.00535741	0.0172719	0	0.0122471	0.00630152	0.0183067	0.0799994	-0.000208603	0.184847	0.0512
386	PE(18:0_20:3) (b)	0.00135226	-1.16537e-05	0.00283686	0.0526	0.0108949	0.00510004	0.0168389	0	0.0122471	0.00632868	0.0181889	0.110415	-0.000951547	0.231635	0.0526
689	TG(56:6) [NL-20:4]	-0.000985957	-0.00235163	2.30271e-05	0.054	0.0132331	0.00727892	0.0192154	0	0.0122471	0.00636901	0.0182261	-0.0805052	-0.192015	0.00188021	0.054
349	LPC(O-18:1)	0.00155602	-4.08332e-05	0.00328035	0.055	0.0106911	0.00525712	0.016306	0	0.0122471	0.00636742	0.0183247	0.127052	-0.00333411	0.267847	0.055
549	CE(20:5)	-0.000818151	-0.00199741	1.2835e-05	0.055	0.0130653	0.00719529	0.0191024	0	0.0122471	0.0063706	0.0183489	-0.0668036	-0.163093	0.001048	0.055
634	TG(48:3) [NL-16:1]	-0.000993287	-0.00241006	1.62599e-05	0.0548	0.0132404	0.00748255	0.019115	0	0.0122471	0.00627297	0.0182996	-0.0811038	-0.196786	0.00132765	0.055
606	DG(16:0_20:4)	-0.0010243	-0.00243469	2.30521e-05	0.0568	0.0132714	0.00740125	0.019386	0	0.0122471	0.00632113	0.0183291	-0.0836363	-0.198797	0.00188225	0.057
620	DG(18:1_22:5)	-0.00110788	-0.00265954	3.56124e-05	0.0594	0.013355	0.00763072	0.0192578	0	0.0122471	0.00633519	0.0183687	-0.0904606	-0.217157	0.00290782	0.0594
559	CE(24:5)	0.000783526	-2.80116e-05	0.00195711	0.0614	0.0114636	0.00547365	0.0175332	0.0004	0.0122471	0.00634415	0.0182329	0.0639764	-0.0022872	0.159802	0.0614
540	CE(18:0)	-0.000667474	-0.00167276	2.67566e-05	0.0624	0.0129146	0.00710463	0.0190031	0	0.0122471	0.00641907	0.0183526	-0.0545005	-0.136584	0.00218472	0.0624
609	DG(16:1_18:1)	-0.000713466	-0.00183142	2.55203e-05	0.0626	0.0129606	0.00693993	0.0190748	0	0.0122471	0.00620392	0.0183598	-0.0582559	-0.149539	0.00208378	0.0626
224	PC(35:5)	0.000604408	-2.06898e-05	0.00158824	0.0634	0.0116427	0.00581335	0.0177208	0.0002	0.0122471	0.00644234	0.0182815	0.0493511	-0.00168936	0.129683	0.0636
475	LPE(18:1) [sn1]	0.00198292	-0.000122556	0.00415058	0.0644	0.0102642	0.0047047	0.0160669	0.0002	0.0122471	0.00633884	0.0182608	0.16191	-0.0100069	0.338903	0.0644
551	CE(22:1)	-0.000619284	-0.00163795	2.09046e-05	0.064	0.0128664	0.0066883	0.0190418	0.0002	0.0122471	0.00622424	0.0182975	-0.0505658	-0.133742	0.0017069	0.0644
656	TG(51:2) [NL-15:0]	-0.000605264	-0.00167915	1.54675e-05	0.0654	0.0128524	0.00702445	0.0187207	0	0.0122471	0.00630025	0.0181337	-0.049421	-0.137106	0.00126295	0.0654
211	PC(18:2_18:2)	-0.000672994	-0.00176	4.06824e-05	0.0676	0.0129201	0.00689258	0.0191206	0.0002	0.0122471	0.00620677	0.0184353	-0.0549513	-0.143707	0.00332179	0.0678
159	SM(d18:2/22:0)	0.000640646	-3.68122e-05	0.00172015	0.0682	0.0116065	0.00572258	0.0174758	0	0.0122471	0.00621804	0.0182498	0.05231	-0.00300579	0.140454	0.0682
337	LPC(22:5) (n3) [sn1] [104_sn1]	0.000775186	-6.1243e-05	0.00193819	0.0718	0.0114719	0.00559471	0.0174665	0.0002	0.0122471	0.0063165	0.018401	0.0632955	-0.00500061	0.158257	0.072
566	DE(20:5)	-0.0005137	-0.00134377	2.55555e-05	0.072	0.0127608	0.00691005	0.0187405	0	0.0122471	0.00638305	0.018235	-0.0419446	-0.109722	0.00208665	0.072
366	PE(15-MHDA_22:6)	-0.000908876	-0.00225953	9.30872e-05	0.0756	0.013156	0.00743102	0.0191697	0	0.0122471	0.00645795	0.0182864	-0.0742114	-0.184495	0.00760075	0.0756
256	PC(O-38:5)	0.000563783	-4.77236e-05	0.00147196	0.0766	0.0116833	0.00590017	0.0174758	0	0.0122471	0.00628075	0.0181941	0.046034	-0.00389672	0.120188	0.0766
545	CE(20:1)	-0.000789687	-0.00197402	7.13436e-05	0.0774	0.0130368	0.00707964	0.0191839	0	0.0122471	0.00632756	0.0183112	-0.0644795	-0.161183	0.00582534	0.0776
439	PE(P-18:0/20:5)	0.000505452	-5.09893e-05	0.0012964	0.0782	0.0117417	0.00591466	0.0178134	0.0002	0.0122471	0.00640968	0.0182913	0.0412711	-0.00416337	0.105853	0.0784
603	DG(16:0_16:1)	-0.000531907	-0.00145513	3.87824e-05	0.0794	0.012779	0.00709283	0.0187852	0	0.0122471	0.00653419	0.0181897	-0.0434312	-0.118814	0.00316666	0.0794
468	PE(P-20:1/22:6)	0.000636933	-5.47459e-05	0.00175995	0.08	0.0116102	0.00562887	0.0174731	0.0002	0.0122471	0.00624786	0.0181921	0.0520068	-0.00447011	0.143703	0.0802
270	PC(P-16:0/20:5)	0.000604925	-4.92394e-05	0.00155433	0.081	0.0116422	0.00555202	0.0177473	0.0002	0.0122471	0.00619895	0.0183486	0.0493933	-0.00402049	0.126914	0.0812
111	GM3(d18:1/24:1)	0.000568912	-5.40854e-05	0.00152162	0.0812	0.0116782	0.00572314	0.017719	0	0.0122471	0.00621348	0.018281	0.0464527	-0.00441618	0.124243	0.0812
445	PE(P-18:1/18:1) (a)	0.000612897	-6.43212e-05	0.00157031	0.0814	0.0116342	0.00582457	0.0176043	0	0.0122471	0.00637956	0.0182747	0.0500442	-0.00525195	0.128219	0.0814
673	TG(54:0) [NL-18:0]	0.000677965	-7.90197e-05	0.00171317	0.0818	0.0115691	0.00573013	0.0175858	0	0.0122471	0.00644094	0.0182353	0.0553572	-0.00645211	0.139884	0.0818
295	LPC(16:1) [sn1]	0.00186477	-0.000252593	0.00404674	0.0828	0.0103823	0.00482886	0.0162168	0	0.0122471	0.00637826	0.0182546	0.152262	-0.0206247	0.330424	0.0828
181	PC(16:0_18:1)	0.000764781	-9.87239e-05	0.00187011	0.084	0.0114823	0.00562683	0.0175171	0	0.0122471	0.00645678	0.0183492	0.0624459	-0.008061	0.152698	0.084
406	PE(O-18:0/22:5)	0.000683495	-8.19547e-05	0.00172214	0.0846	0.0115636	0.00559689	0.0174302	0.0004	0.0122471	0.00629535	0.0181268	0.0558087	-0.00669176	0.140616	0.0846
594	AC(16:1)	-0.000801231	-0.00206794	9.76232e-05	0.0866	0.0130483	0.00704847	0.0191891	0	0.0122471	0.0062999	0.0183886	-0.0654221	-0.168851	0.00797112	0.0866
537	CE(16:2)	-0.00105689	-0.00249288	0.000138381	0.087	0.013304	0.00732825	0.0192829	0	0.0122471	0.0062747	0.0183093	-0.0862972	-0.203548	0.0112991	0.087
690	TG(56:6) [NL-22:5](a)	-0.0011809	-0.00300053	0.000155914	0.0872	0.013428	0.00782275	0.0192146	0	0.0122471	0.00619067	0.0182173	-0.096423	-0.244999	0.0127307	0.0872
340	LPC(22:5) [sn2] (n3)	0.000602754	-7.9919e-05	0.00163382	0.0896	0.0116444	0.00569457	0.017646	0	0.0122471	0.00636211	0.0182995	0.049216	-0.00652554	0.133405	0.0896
233	PC(39:5)(b)	-0.000538076	-0.00150224	5.64569e-05	0.0918	0.0127852	0.00680415	0.0186302	0.0002	0.0122471	0.00628241	0.0180745	-0.0439349	-0.122661	0.00460981	0.092
691	TG(56:6) [NL-22:5](b)	-0.0011758	-0.00293936	0.000177993	0.0934	0.0134229	0.00784689	0.0191569	0	0.0122471	0.00636082	0.0182158	-0.0960061	-0.240004	0.0145334	0.0938
697	TG(56:8) [NL-20:4]	-0.00100683	-0.00257405	0.000151242	0.0956	0.0132539	0.00757006	0.0191353	0	0.0122471	0.00638792	0.0181413	-0.0822095	-0.210176	0.0123492	0.0956
298	LPC(17:1) (a) [sn1] [104_sn1]	0.00114977	-0.000233369	0.00267448	0.096	0.0110973	0.00529981	0.0170654	0.0002	0.0122471	0.00631643	0.0182465	0.0938808	-0.0190551	0.218376	0.096
252	PC(O-34:4)	0.000533653	-7.07926e-05	0.00143503	0.0986	0.0117135	0.00591021	0.0178436	0	0.0122471	0.00638415	0.0183198	0.0435738	-0.00578035	0.117173	0.0986
303	LPC(18:0) [sn2]	0.000617254	-0.000116956	0.00158398	0.1004	0.0116299	0.00593009	0.0175818	0	0.0122471	0.00638335	0.0183012	0.0503999	-0.00954971	0.129335	0.1004
733	PC(38:6) [+OH]	-0.000463851	-0.00136804	5.44673e-05	0.1036	0.012711	0.00687492	0.0187514	0	0.0122471	0.00637498	0.0182705	-0.0378743	-0.111703	0.00444736	0.1036
444	PE(P-18:1/18:1)	0.000528422	-8.9244e-05	0.00142779	0.104	0.0117187	0.0058919	0.0175553	0	0.0122471	0.00632333	0.0181814	0.0431467	-0.00728694	0.116582	0.104
316	LPC(19:1) (a)	0.000773325	-0.000149407	0.00190869	0.1044	0.0114738	0.00561069	0.017585	0.0002	0.0122471	0.00630241	0.0184508	0.0631435	-0.0121993	0.155848	0.1044
583	FA(22:4)	-0.00074936	-0.00192579	0.000130028	0.106	0.0129965	0.00727095	0.0190656	0	0.0122471	0.00654204	0.018223	-0.0611867	-0.157245	0.010617	0.106
347	LPC(O-16:0)	0.000899701	-0.000209807	0.00222581	0.1068	0.0113474	0.00578803	0.0170948	0	0.0122471	0.00647861	0.0184172	0.0734623	-0.0171312	0.181742	0.1068
339	LPC(22:5) [sn1] (n6)	0.00164953	-0.000345461	0.00366308	0.107	0.0105976	0.00485575	0.0166653	0.0002	0.0122471	0.00645373	0.0183266	0.134687	-0.0282075	0.299097	0.1072
684	TG(54:6) [NL-20:4]	-0.0012223	-0.00303854	0.00024833	0.1084	0.0134694	0.00771662	0.0193215	0	0.0122471	0.00617959	0.0183162	-0.0998029	-0.248102	0.0202767	0.1084
110	GM3(d18:1/24:0)	0.00045027	-7.27736e-05	0.0013411	0.112	0.0117968	0.00584714	0.017757	0.0006	0.0122471	0.00629515	0.0182511	0.0367654	-0.0059421	0.109503	0.1124
246	PC(O-18:1/18:1)	0.000753951	-0.000162234	0.00193044	0.1128	0.0114932	0.00578189	0.0173312	0	0.0122471	0.0063547	0.0181418	0.0615616	-0.0132467	0.157624	0.1128
602	DG(16:0_16:0)	-0.000455414	-0.00131295	7.32317e-05	0.1176	0.0127025	0.00679996	0.0188048	0	0.0122471	0.00631544	0.0183027	-0.0371854	-0.107205	0.00597951	0.1176
195	PC(17:0_20:4)	-0.000685317	-0.00182597	0.000153568	0.121	0.0129324	0.00690042	0.0188558	0	0.0122471	0.00622236	0.0182789	-0.0559575	-0.149094	0.0125391	0.121
503	PI(18:0_22:5) (n6)	-0.00077226	-0.00208899	0.00020146	0.1238	0.0130194	0.00720149	0.0190095	0	0.0122471	0.00624195	0.0181751	-0.0630565	-0.17057	0.0164496	0.1238
97	Hex2Cer(d18:1/24:1)	0.00056468	-0.000145657	0.00153255	0.13	0.0116824	0.00586647	0.0176016	0	0.0122471	0.00631739	0.018263	0.0461072	-0.0118932	0.125136	0.13
293	LPC(16:0) [sn1]	0.00104771	-0.000315147	0.00250238	0.1318	0.0111994	0.00569116	0.0169643	0	0.0122471	0.00639448	0.018274	0.0855474	-0.0257324	0.204324	0.1318
479	LPE(20:4) [sn1]	0.00131234	-0.000390942	0.00315266	0.1318	0.0109348	0.00516983	0.0170063	0.0008	0.0122471	0.00640757	0.0182511	0.107155	-0.0319212	0.257421	0.132
174	PC(15-MHDA_20:4)	-0.00051119	-0.00145529	0.000111261	0.1328	0.0127583	0.00687878	0.018696	0	0.0122471	0.00623953	0.0183041	-0.0417396	-0.118827	0.00908468	0.1328
565	DE(20:4)	-0.00113458	-0.00273485	0.000329743	0.1334	0.0133817	0.00782773	0.0190255	0	0.0122471	0.0063651	0.0181447	-0.092641	-0.223305	0.0269241	0.1334
709	TG(O-50:2) [NL-18:1]	0.000455349	-0.000134903	0.00127882	0.1342	0.0117918	0.00588044	0.0177222	0.0002	0.0122471	0.00637978	0.0181777	0.0371801	-0.0110151	0.104418	0.1342
157	SM(d18:2/18:1)	0.000419492	-0.000108045	0.00119608	0.136	0.0118276	0.00608643	0.0177674	0	0.0122471	0.00644168	0.0182278	0.0342523	-0.00882206	0.097662	0.136
242	PC(O-18:0/18:1)	0.000721674	-0.000217657	0.00186091	0.136	0.0115254	0.00581111	0.0174298	0.0004	0.0122471	0.00637606	0.0183404	0.0589261	-0.0177721	0.151947	0.1362
693	TG(56:7) [NL-20:5]	-0.0010386	-0.00267446	0.000318494	0.1362	0.0132857	0.00755968	0.0192687	0	0.0122471	0.00627103	0.0182103	-0.0848034	-0.218374	0.0260057	0.1362
647	TG(50:3) [NL-14:1]	-0.000417989	-0.00129629	9.08675e-05	0.1372	0.0126651	0.00693326	0.0186781	0	0.0122471	0.00640419	0.0183656	-0.0341296	-0.105845	0.00741951	0.1372
522	LPI(20:4) [sn2]	0.000505651	-0.000149724	0.00141887	0.1416	0.0117415	0.00576203	0.0176718	0.0002	0.0122471	0.00633211	0.0181145	0.0412874	-0.0122253	0.115854	0.1416
665	TG(52:4) [NL-16:1]	-0.000854596	-0.00227501	0.000278109	0.1444	0.0131017	0.00733904	0.0189584	0	0.0122471	0.00624031	0.0182629	-0.0697794	-0.185759	0.0227081	0.1446
296	LPC(16:1) [sn2]	0.00136913	-0.000486847	0.00330271	0.1448	0.010878	0.00516384	0.0166956	0	0.0122471	0.00623117	0.0182523	0.111792	-0.039752	0.269673	0.1448
309	LPC(18:3) [sn1] (a)/LPC(18:3) [sn2] (b)	-0.00126184	-0.00315078	0.000430702	0.148	0.013509	0.00768909	0.019289	0	0.0122471	0.00625249	0.0182254	-0.103032	-0.257268	0.0351676	0.1484
294	LPC(16:0) [sn2]	0.000822291	-0.000320658	0.00208589	0.1508	0.0114248	0.00567721	0.0172236	0.0006	0.0122471	0.00632148	0.0182445	0.0671416	-0.0261824	0.170317	0.151
389	PE(18:0_22:5) (n3)	-0.000411152	-0.00133532	9.50181e-05	0.151	0.0126583	0.00665298	0.0187763	0	0.0122471	0.0063181	0.0182624	-0.0335713	-0.109031	0.00775841	0.151
308	LPC(18:3) (a) [sn1] [104_sn1]	-0.0011166	-0.00273851	0.000384905	0.1516	0.0133637	0.00774268	0.0191345	0	0.0122471	0.00633312	0.0181927	-0.0911723	-0.223604	0.0314282	0.1518
399	PE(38:5) (b)	0.00042735	-0.000139893	0.00120648	0.152	0.0118198	0.00596464	0.0178803	0.0002	0.0122471	0.0063485	0.0183515	0.034894	-0.0114225	0.0985115	0.1522
607	DG(16:0_22:5)	-0.00132587	-0.00334475	0.000443273	0.1556	0.013573	0.00798888	0.0193393	0.0002	0.0122471	0.00636123	0.0182237	-0.10826	-0.273105	0.0361941	0.1558
588	AC(14:0)	-0.000480373	-0.00142793	0.000165701	0.1582	0.0127275	0.00698519	0.018692	0	0.0122471	0.00651581	0.0182583	-0.0392233	-0.116594	0.0135298	0.1582
292	LPC(15:0) [sn2]	0.000615176	-0.00022472	0.00174826	0.1608	0.0116319	0.00567914	0.0175394	0.0002	0.0122471	0.00629444	0.0182418	0.0502303	-0.0183488	0.142749	0.161
230	PC(38:6) (a)	-0.000373303	-0.00117652	0.000109566	0.1634	0.0126204	0.00674108	0.01866	0	0.0122471	0.00632782	0.0183427	-0.0304809	-0.096065	0.00894627	0.1634
553	CE(22:5) (n3)	-0.000405665	-0.0012685	0.000124734	0.1642	0.0126528	0.00650296	0.0187848	0.0002	0.0122471	0.0061548	0.0183338	-0.0331233	-0.103576	0.0101848	0.164
311	LPC(18:3) [sn2] (a)	-0.000718756	-0.00192792	0.000269344	0.1662	0.0129659	0.00711841	0.0186447	0	0.0122471	0.0062624	0.0181146	-0.0586878	-0.157418	0.0219924	0.1662
575	FA(18:0)	0.00043256	-0.000164498	0.00121259	0.166	0.0118146	0.00577164	0.0178765	0.0004	0.0122471	0.00630313	0.0182667	0.0353194	-0.0134316	0.0990102	0.1664
533	CE(14:0)	-0.000405772	-0.00127576	0.000121888	0.1672	0.0126529	0.00666087	0.0186335	0	0.0122471	0.0063874	0.0182058	-0.033132	-0.104169	0.00995241	0.1672
268	PC(P-16:0/18:3)	0.000340184	-0.000104985	0.00101345	0.1696	0.0119069	0.00593997	0.01802	0	0.0122471	0.00627486	0.0183106	0.0277767	-0.00857227	0.0827497	0.1696
557	CE(24:1)	-0.00040101	-0.00125359	0.000143641	0.1696	0.0126481	0.00672233	0.0187399	0	0.0122471	0.00640269	0.0182694	-0.0327432	-0.102358	0.0117286	0.1696
467	PE(P-20:1/20:4)	0.000359737	-0.000109271	0.00113038	0.1708	0.0118874	0.00599481	0.017888	0	0.0122471	0.00634806	0.0182429	0.0293732	-0.00892218	0.0922979	0.1708
348	LPC(O-18:0)	0.00048977	-0.000231337	0.0014092	0.1742	0.0117573	0.00608922	0.0175096	0.0002	0.0122471	0.00633732	0.0181643	0.0399906	-0.0188891	0.115064	0.1744
237	PC(44:12)	0.000422009	-0.000144234	0.0013152	0.1746	0.0118251	0.00590969	0.0178015	0	0.0122471	0.00638304	0.018185	0.0344578	-0.011777	0.107388	0.1746
158	SM(d18:2/20:0)	0.000429673	-0.0001871	0.00132007	0.1748	0.0118174	0.00597858	0.0177438	0	0.0122471	0.00626138	0.0182326	0.0350836	-0.015277	0.107786	0.1748
422	PE(P-16:0/20:3) (b)	-0.000394674	-0.00128499	0.000145644	0.1754	0.0126418	0.00662033	0.0188994	0.0002	0.0122471	0.00629132	0.0184098	-0.0322259	-0.104922	0.0118921	0.1756
494	PI(17:0_18:1)	-0.000370912	-0.00120225	0.000106088	0.1778	0.012618	0.00662606	0.0185339	0	0.0122471	0.00613157	0.0181746	-0.0302857	-0.0981658	0.00866232	0.1778
509	PI(36:2)	0.000417815	-0.000193052	0.0012068	0.1782	0.0118293	0.00599101	0.0176729	0	0.0122471	0.00632217	0.0181038	0.0341154	-0.0157631	0.0985378	0.1782
630	TG(48:2) [NL-14:1]	-0.000347506	-0.00118504	0.000103281	0.179	0.0125946	0.0068816	0.0184325	0	0.0122471	0.00641873	0.0181589	-0.0283745	-0.0967606	0.00843307	0.179
7	S1P(d18:2)	0.000475788	-0.000216922	0.0013455	0.1812	0.0117713	0.00596298	0.0176323	0	0.0122471	0.00624316	0.0181284	0.038849	-0.0177121	0.109863	0.1812
153	SM(d18:2/14:0)	0.000491374	-0.000214328	0.00142914	0.1854	0.0117557	0.00581862	0.0177283	0.0006	0.0122471	0.00626601	0.0182314	0.0401216	-0.0175003	0.116692	0.1854
302	LPC(18:0) [sn1]	0.000522741	-0.000287041	0.00144731	0.1896	0.0117244	0.00601172	0.0175692	0	0.0122471	0.00635722	0.0182052	0.0426828	-0.0234374	0.118176	0.1896
267	PC(P-16:0/18:2)	0.00039881	-0.000159449	0.00123765	0.191	0.0118483	0.00572437	0.0180146	0.0002	0.0122471	0.00622849	0.018297	0.0325636	-0.0130194	0.101056	0.191
562	DE(16:0)	-0.000426571	-0.00133813	0.000209915	0.1916	0.0126737	0.0067442	0.0185731	0	0.0122471	0.00625224	0.0182378	-0.0348304	-0.109261	0.01714	0.1918
391	PE(18:0_22:6)	-0.00048983	-0.00160707	0.000212488	0.1918	0.0127369	0.0068487	0.0188813	0	0.0122471	0.00644056	0.018296	-0.0399955	-0.13122	0.01735	0.1918
307	LPC(18:2) [sn2]	-0.000910491	-0.00243325	0.000459378	0.192	0.0131576	0.00748491	0.0188872	0	0.0122471	0.00640914	0.0181329	-0.0743433	-0.198679	0.0375091	0.192
257	PC(O-40:5)	0.000359815	-0.000143462	0.00117226	0.1932	0.0118873	0.00594913	0.0177682	0	0.0122471	0.00630089	0.0182201	0.0293796	-0.011714	0.0957174	0.1932
664	TG(52:3) [NL-18:2]	-0.000805188	-0.00227392	0.000408981	0.198	0.0130523	0.00744967	0.0190322	0	0.0122471	0.00642057	0.0182901	-0.0657451	-0.18567	0.0333941	0.198
558	CE(24:4)	-0.000371594	-0.00118698	0.000171923	0.2	0.0126187	0.00664717	0.0186739	0.0002	0.0122471	0.00635306	0.0182687	-0.0303414	-0.0969195	0.0140379	0.1998
109	GM3(d18:1/22:0)	0.000373617	-0.000163479	0.00119362	0.2	0.0118735	0.00620949	0.0178826	0	0.0122471	0.00657464	0.0182983	0.0305065	-0.0133484	0.0974614	0.2
552	CE(22:4)	-0.000371694	-0.0011505	0.000176195	0.2004	0.0126188	0.00663196	0.0186476	0	0.0122471	0.00623882	0.018309	-0.0303496	-0.0939407	0.0143867	0.2004
442	PE(P-18:0/22:5) (n6)	0.000396832	-0.000190494	0.00124269	0.2014	0.0118503	0.00619555	0.0179153	0	0.0122471	0.00652235	0.0183964	0.0324021	-0.0155542	0.101468	0.2014
105	Hex3Cer(d18:1/24:1)	0.000397647	-0.000209356	0.00121991	0.2016	0.0118495	0.00586628	0.0178124	0	0.0122471	0.00633223	0.0182408	0.0324687	-0.0170943	0.0996083	0.2016
653	TG(50:4) [NL-20:4]	-0.000683385	-0.00205593	0.000327419	0.2032	0.0129305	0.0072406	0.0188061	0	0.0122471	0.00639793	0.0182326	-0.0557997	-0.167871	0.0267344	0.2032
715	TG(O-52:2) [NL-16:0]	0.000357335	-0.000169794	0.00119554	0.2054	0.0118898	0.00587949	0.0178234	0	0.0122471	0.00624615	0.0181961	0.0291771	-0.013864	0.0976185	0.2054
291	LPC(15:0) [sn1]	0.000514119	-0.00028619	0.0014882	0.2056	0.011733	0.00597926	0.0176156	0	0.0122471	0.00638343	0.0182235	0.0419788	-0.0233679	0.121515	0.2056
154	SM(d18:2/16:0)	0.00042056	-0.000225545	0.00134715	0.2084	0.0118266	0.00604718	0.0177868	0	0.0122471	0.00642277	0.0183215	0.0343395	-0.0184162	0.109997	0.2084
387	PE(18:0_20:4)	-0.000425538	-0.00139737	0.000212899	0.2082	0.0126726	0.00672271	0.0187847	0	0.0122471	0.00630072	0.0183381	-0.034746	-0.114098	0.0173836	0.2084
365	PE(15-MHDA_20:4)	-0.000453958	-0.00149435	0.000237767	0.2098	0.0127011	0.00678743	0.0187576	0	0.0122471	0.0062714	0.0183238	-0.0370665	-0.122017	0.0194141	0.2098
482	LPE(22:6) [sn2]	0.000568304	-0.000329416	0.00168368	0.2106	0.0116788	0.00579556	0.0176788	0.0002	0.0122471	0.00631077	0.0182082	0.0464031	-0.0268974	0.137476	0.2106
206	PC(18:1_18:1)	0.000639933	-0.000357487	0.0017389	0.2134	0.0116072	0.00577874	0.0176762	0.0002	0.0122471	0.00636307	0.01827	0.0522517	-0.0291895	0.141985	0.2136
214	PC(28:0)	-0.000415515	-0.00128802	0.000224983	0.215	0.0126626	0.00669732	0.0186253	0	0.0122471	0.00631505	0.0181753	-0.0339276	-0.105169	0.0183703	0.215
290	LPC(15-MHDA) [sn2]	0.000525471	-0.000299618	0.00164363	0.2168	0.0117216	0.00568695	0.0178574	0.0002	0.0122471	0.00632587	0.01827	0.0429057	-0.0244644	0.134206	0.2168
310	LPC(18:3) [sn1] (b)	-0.00116017	-0.00316532	0.000634974	0.2172	0.0134073	0.00782179	0.0192049	0	0.0122471	0.00642101	0.0181858	-0.0947301	-0.258454	0.0518469	0.2172
49	Cer(d18:2/24:1)	0.000378869	-0.000220152	0.00120762	0.2174	0.0118682	0.00610081	0.0176915	0	0.0122471	0.00639678	0.0181766	0.0309354	-0.0179759	0.0986043	0.2174
221	PC(33:1)	0.000327245	-0.000158987	0.00109544	0.218	0.0119199	0.00594731	0.0179865	0.0002	0.0122471	0.00633304	0.0182951	0.0267202	-0.0129816	0.0894448	0.218
355	LPC(O-24:1)	0.000720308	-0.000409686	0.00202594	0.2194	0.0115268	0.00562587	0.0174743	0	0.0122471	0.00624385	0.0182439	0.0588145	-0.0334516	0.165422	0.2194
54	Cer(d19:1/22:0)	0.000293311	-0.000142842	0.00100196	0.222	0.0119538	0.00595281	0.0180218	0.0002	0.0122471	0.00634149	0.0181937	0.0239494	-0.0116633	0.0818123	0.222
80	HexCer(d18:1/16:0)	-0.000391903	-0.00130923	0.000193795	0.223	0.012639	0.00670721	0.018551	0	0.0122471	0.00631036	0.0182036	-0.0319996	-0.106901	0.0158237	0.2232
548	CE(20:4)	-0.000547377	-0.00151402	0.000323825	0.2248	0.0127945	0.00694686	0.0186439	0	0.0122471	0.0063027	0.0182873	-0.0446944	-0.123623	0.0264409	0.2248
488	PI(15-MHDA_20:4)\PI(17:0_20:4)	-0.000629503	-0.00194126	0.000386268	0.2264	0.0128766	0.00715478	0.0188652	0	0.0122471	0.0064662	0.0182426	-0.0514001	-0.158507	0.0315395	0.2264
281	PC(P-35:2)(a)	0.000298624	-0.000136061	0.000985001	0.2274	0.0119485	0.00591213	0.0179567	0	0.0122471	0.00623406	0.0182871	0.0243832	-0.0111097	0.0804272	0.2274
679	TG(54:4) [NL-18:2]	-0.000593342	-0.00176113	0.000321131	0.2274	0.0128405	0.00711044	0.018897	0	0.0122471	0.00637395	0.0184094	-0.0484475	-0.143799	0.026221	0.2274
113	Sulfatide (d18:1:/16:0(OH))	0.000330092	-0.000174223	0.00107277	0.2294	0.011917	0.00605089	0.0179219	0	0.0122471	0.00634226	0.0181551	0.0269526	-0.0142257	0.0875939	0.2294
152	SM(d18:1/24:1)	0.000511527	-0.000329826	0.00154386	0.2318	0.0117356	0.00602001	0.0175754	0	0.0122471	0.00636686	0.0182318	0.0417672	-0.0269309	0.126059	0.2318
201	PC(18:0_20:4)	-0.000360838	-0.00122566	0.000166997	0.2382	0.0126079	0.00673948	0.0185056	0	0.0122471	0.00629055	0.018181	-0.0294631	-0.100078	0.0136356	0.2382
584	FA(22:5)	-0.000332225	-0.00113973	0.000164217	0.2416	0.0125793	0.00659349	0.0185691	0	0.0122471	0.00629013	0.0182296	-0.0271268	-0.0930614	0.0134086	0.2416
493	PI(16:0/16:0)	-0.000292064	-0.00107911	0.000144512	0.247	0.0125392	0.00656856	0.0184345	0	0.0122471	0.00625421	0.0182108	-0.0238476	-0.0881118	0.0117997	0.247
266	PC(P-16:0/18:1)	0.000287555	-0.000158219	0.00107358	0.2486	0.0119596	0.00604869	0.0179453	0	0.0122471	0.00634873	0.0183111	0.0234794	-0.0129189	0.08766	0.2486
282	PC(P-35:2)(b)	0.000315948	-0.000181099	0.00114281	0.2524	0.0119312	0.00594458	0.0179988	0	0.0122471	0.00631054	0.0182507	0.0257977	-0.0147871	0.0933122	0.2524
375	PE(16:0_20:5)	0.000267614	-0.000155275	0.00095226	0.2548	0.0119795	0.00602763	0.0179516	0	0.0122471	0.00631293	0.0181724	0.0218512	-0.0126785	0.0777539	0.2548
191	PC(16:1_20:4)	0.000502958	-0.000398754	0.00158027	0.2554	0.0117442	0.00580078	0.0179201	0.0004	0.0122471	0.00624359	0.0184046	0.0410675	-0.032559	0.129032	0.2554
353	LPC(O-22:1)	0.000774593	-0.000632927	0.00226765	0.2566	0.0114725	0.00590301	0.017321	0	0.0122471	0.00644356	0.0183634	0.063247	-0.0516797	0.185158	0.2566
408	PE(O-18:1/18:2)	-0.000286875	-0.00105281	0.000167913	0.2686	0.012534	0.00666554	0.01858	0	0.0122471	0.00644407	0.0182658	-0.0234239	-0.0859643	0.0137105	0.2686
694	TG(56:7) [NL-22:5](a)	-0.000950501	-0.00291173	0.000707929	0.271	0.0131976	0.00772102	0.0188483	0	0.0122471	0.00628123	0.0182106	-0.0776102	-0.237748	0.0578038	0.271
285	PC(P-38:5) (b)	0.000247868	-0.000160601	0.000946586	0.2748	0.0119992	0.00626379	0.0180678	0	0.0122471	0.00647131	0.0183619	0.0202389	-0.0131134	0.0772905	0.2748
137	SM(d16:1/24:1)	0.000424018	-0.000334703	0.00132885	0.2752	0.0118231	0.0059854	0.0178164	0	0.0122471	0.00636921	0.0183658	0.0346219	-0.0273292	0.108503	0.2752
186	PC(16:0_20:3) (b)	0.00115235	-0.000908295	0.00312634	0.278	0.0110948	0.00506621	0.0173053	0.0004	0.0122471	0.00628138	0.0183082	0.0940919	-0.074164	0.255272	0.278
629	TG(48:2) [NL-14:0]	-0.000521184	-0.00172167	0.000378337	0.2792	0.0127683	0.00699055	0.0186462	0	0.0122471	0.00621115	0.0183223	-0.0425557	-0.140578	0.0308919	0.2792
306	LPC(18:2) [sn1]	-0.000913188	-0.0027411	0.000722337	0.2838	0.0131603	0.00760301	0.0190416	0	0.0122471	0.00635178	0.0184242	-0.0745635	-0.223816	0.0589802	0.2838
218	PC(32:2)	-0.000379613	-0.00135428	0.000301401	0.284	0.0126267	0.00659925	0.0187186	0	0.0122471	0.00623376	0.0183564	-0.0309961	-0.11058	0.02461	0.284
188	PC(16:0_20:5)	0.000284175	-0.000202909	0.00102894	0.286	0.0119629	0.00607304	0.0179913	0	0.0122471	0.00638567	0.0181678	0.0232034	-0.0165679	0.0840148	0.286
695	TG(56:7) [NL-22:5](b)	-0.000951708	-0.00291343	0.00075748	0.2888	0.0131988	0.00794611	0.0188732	0	0.0122471	0.00652631	0.0183915	-0.0777088	-0.237887	0.0618497	0.2888
404	PE(O-16:0/22:6)	-0.000467117	-0.00151053	0.000405407	0.2898	0.0127142	0.00678707	0.018678	0	0.0122471	0.00629496	0.0183421	-0.038141	-0.123338	0.0331022	0.2898
661	TG(52:2) [NL-16:0]	-0.000324206	-0.00119448	0.000240237	0.2904	0.0125713	0.00680593	0.0184132	0	0.0122471	0.00632893	0.0182438	-0.0264721	-0.0975313	0.0196158	0.2904
593	AC(16:0)	-0.000351147	-0.00129728	0.000261118	0.292	0.0125983	0.00673534	0.0186825	0	0.0122471	0.0063857	0.0182543	-0.0286719	-0.105925	0.0213208	0.2922
415	PE(P-15:0/20:4) (b)	0.000254482	-0.000190189	0.000947896	0.2924	0.0119926	0.00603417	0.0179274	0.0002	0.0122471	0.00634657	0.0181675	0.0207789	-0.0155293	0.0773975	0.2926
448	PE(P-18:1/18:2) (b)	0.00023544	-0.000186183	0.000810702	0.2928	0.0120117	0.00601179	0.0179576	0.0002	0.0122471	0.00618155	0.018113	0.0192241	-0.0152022	0.0661954	0.2928
504	PI(18:0_22:6)	0.0003059	-0.000237513	0.00108076	0.2974	0.0119412	0.00605173	0.0179426	0.0002	0.0122471	0.00641247	0.0182284	0.0249773	-0.0193934	0.0882461	0.2976
199	PC(18:0_18:2)	-0.000253794	-0.00091578	0.000185395	0.298	0.0125009	0.00668329	0.018481	0	0.0122471	0.00642625	0.01819	-0.0207228	-0.0747752	0.0151379	0.298
207	PC(18:1_18:2)	-0.000375315	-0.00130392	0.00031895	0.2986	0.0126224	0.0068225	0.0186139	0	0.0122471	0.0064368	0.0181521	-0.0306452	-0.106467	0.0260428	0.2988
502	PI(18:0_22:5) (n3)	-0.000337305	-0.00121984	0.000275214	0.3024	0.0125844	0.00663686	0.0185825	0	0.0122471	0.00628381	0.0182452	-0.0275416	-0.0996027	0.0224718	0.3024
726	CE(20:4) [+OH]	-0.000268166	-0.00101447	0.000191052	0.303	0.0125153	0.0065932	0.0184389	0	0.0122471	0.00636988	0.0181344	-0.0218962	-0.0828335	0.0155997	0.303
596	AC(17:0) (b)	-0.000264874	-0.00101333	0.000173808	0.3038	0.012512	0.00665559	0.0184865	0	0.0122471	0.00641764	0.0182375	-0.0216275	-0.0827401	0.0141918	0.3038
247	PC(O-18:1/18:2)	-0.000244163	-0.000920792	0.000183979	0.3052	0.0124913	0.00664506	0.0184383	0	0.0122471	0.00635301	0.0182285	-0.0199364	-0.0751845	0.0150222	0.3052
481	LPE(22:6) [sn1]	0.000526985	-0.00053494	0.00176416	0.3072	0.0117201	0.00598821	0.0177557	0.0002	0.0122471	0.0065662	0.0182408	0.0430293	-0.0436789	0.144047	0.3074
63	Cer(d20:1/26:0)	0.000317607	-0.000243043	0.00128146	0.309	0.0119295	0.00592798	0.0179061	0	0.0122471	0.00629716	0.0182401	0.0259332	-0.0198449	0.104634	0.309
649	TG(50:3) [NL-18:2]	-0.000647549	-0.00212213	0.000556172	0.309	0.0128947	0.00732556	0.0186938	0	0.0122471	0.00627475	0.0182893	-0.0528736	-0.173276	0.0454125	0.309
106	GM3(d18:1/16:0)	0.000276525	-0.000210069	0.00112469	0.311	0.0119706	0.00594078	0.0179279	0.0002	0.0122471	0.00621995	0.0182859	0.0225788	-0.0171525	0.091833	0.311
674	TG(54:1) [NL-18:1]	0.000443966	-0.000412526	0.00141777	0.3122	0.0118031	0.00571247	0.0179338	0	0.0122471	0.0062716	0.0182681	0.0362506	-0.0336836	0.115764	0.3122
416	PE(P-15:0/22:6) (a)	0.000270925	-0.000272117	0.000975505	0.3144	0.0119762	0.00610524	0.0180583	0	0.0122471	0.00630681	0.0183898	0.0221215	-0.0222188	0.0796519	0.3144
147	SM(d18:1/18:0/SM(d16:1/20:0)	0.000315016	-0.000296421	0.00114924	0.3156	0.0119321	0.0059649	0.0177673	0.0002	0.0122471	0.00625619	0.0181574	0.0257216	-0.0242034	0.0938379	0.3154
351	LPC(O-20:1)	0.000739883	-0.000720904	0.00227876	0.3176	0.0115072	0.00591853	0.0172965	0	0.0122471	0.00629789	0.0183507	0.0604129	-0.0588632	0.186065	0.3176
434	PE(P-18:0/18:2)	0.000274362	-0.000294916	0.000909252	0.3192	0.0119727	0.00596223	0.0180894	0	0.0122471	0.00626649	0.0183217	0.0224022	-0.0240804	0.0742422	0.3192
472	LPE(17:0) [sn2]	0.000411689	-0.000433356	0.00146098	0.3198	0.0118354	0.00587562	0.0178659	0	0.0122471	0.00637093	0.0182764	0.0336152	-0.0353844	0.119292	0.3198
244	PC(O-18:0/20:4)	0.000234599	-0.000170526	0.00100571	0.3216	0.0120125	0.00612519	0.0180846	0	0.0122471	0.00632153	0.0183348	0.0191555	-0.0139238	0.0821184	0.3216
212	PC(18:2_20:5)	-0.000292162	-0.00106408	0.000280511	0.322	0.0125393	0.00658306	0.0186861	0	0.0122471	0.00630734	0.018393	-0.0238556	-0.086884	0.0229043	0.322
636	TG(49:1) [NL-16:1]	0.000253136	-0.000204304	0.00101269	0.325	0.011994	0.0059701	0.017997	0	0.0122471	0.00628679	0.018301	0.020669	-0.0166818	0.0826883	0.325
471	LPE(17:0) [sn1]	0.000332339	-0.000327917	0.00123005	0.3268	0.0119148	0.00595006	0.0178811	0	0.0122471	0.00634858	0.0181649	0.0271361	-0.0267751	0.100436	0.3268
681	TG(54:5) [NL-18:3]	-0.000463257	-0.00160957	0.000442425	0.3268	0.0127104	0.00685776	0.0186497	0.0002	0.0122471	0.00616879	0.0182286	-0.0378258	-0.131424	0.0361248	0.3272
654	TG(51:0) [NL-16:0]	-0.000391322	-0.00141765	0.000390472	0.3272	0.0126384	0.00676944	0.0186052	0.0002	0.0122471	0.00642852	0.0181767	-0.0319522	-0.115753	0.0318828	0.3276
555	CE(22:6)	-0.000303655	-0.00116218	0.000301553	0.3292	0.0125508	0.00669112	0.0186158	0	0.0122471	0.00640453	0.0183432	-0.024794	-0.0948938	0.0246224	0.3292
395	PE(18:1_22:6) (b)	0.000352044	-0.000398975	0.00118556	0.33	0.0118951	0.00607542	0.0178313	0	0.0122471	0.00643786	0.0182018	0.028745	-0.0325771	0.096803	0.33
663	TG(52:3) [NL-16:1]	-0.000526928	-0.00179807	0.000514408	0.3318	0.012774	0.00688849	0.0186986	0.0002	0.0122471	0.00640276	0.01823	-0.0430247	-0.146816	0.0420024	0.332
483	LPE(P-16:0)	0.000379836	-0.000358815	0.00133851	0.3336	0.0118673	0.00605967	0.0178044	0.0002	0.0122471	0.00630451	0.0183564	0.0310144	-0.0292979	0.109292	0.3334
128	SM(41:1) (a)	-0.0002219	-0.00082723	0.000202275	0.3372	0.012469	0.00664104	0.0185135	0	0.0122471	0.00629397	0.0183277	-0.0181186	-0.0675449	0.0165162	0.3372
210	PC(18:1_22:6) (b)	0.000265396	-0.000244044	0.000955045	0.34	0.0119817	0.00605663	0.0180246	0	0.0122471	0.00628945	0.0182482	0.0216701	-0.0199267	0.0779812	0.34
713	TG(O-52:1) [NL-16:0]	0.000226473	-0.000236712	0.000863633	0.3412	0.0120206	0.00613463	0.0180182	0	0.0122471	0.00634795	0.0182878	0.0184919	-0.019328	0.0705173	0.3412
495	PI(17:0_18:2)	0.000412289	-0.000480607	0.00135465	0.342	0.0118348	0.00601081	0.0178244	0	0.0122471	0.00629542	0.0182804	0.0336641	-0.0392425	0.11061	0.342
530	PG(34:1)	-0.000322183	-0.00126652	0.000304461	0.343	0.0125693	0.0068332	0.0185696	0.0002	0.0122471	0.00642737	0.0183161	-0.0263069	-0.103413	0.0248598	0.3434
614	DG(18:1_18:1)	-0.000210369	-0.000836681	0.000187706	0.3446	0.0124575	0.00657016	0.0186196	0.0002	0.0122471	0.00631055	0.0183586	-0.017177	-0.0683166	0.0153266	0.3448
582	FA(20:5)	0.000208789	-0.000172774	0.000885677	0.3464	0.0120383	0.00602218	0.0180341	0	0.0122471	0.00625908	0.0182117	0.017048	-0.0141074	0.0723172	0.3464
250	PC(O-34:1)	0.000358569	-0.000388594	0.00127422	0.3466	0.0118885	0.00626039	0.0176938	0	0.0122471	0.00646512	0.0181537	0.0292778	-0.0317294	0.104043	0.3466
542	CE(18:2)	-0.000255193	-0.000993516	0.000252667	0.3486	0.0125023	0.00655477	0.0184188	0	0.0122471	0.00636939	0.0181289	-0.020837	-0.0811224	0.0206307	0.3486
719	TG(O-54:2) [NL-18:1]	0.000300006	-0.000311187	0.00109651	0.349	0.0119471	0.00594265	0.0179528	0	0.0122471	0.00634368	0.0182499	0.024496	-0.025409	0.0895322	0.349
624	DG(18:2_22:6)	0.00100559	-0.00111633	0.00318783	0.3524	0.0112415	0.00561228	0.0172267	0.0002	0.0122471	0.00631132	0.0184345	0.0821087	-0.0911502	0.260293	0.3524
501	PI(18:0_22:4)	0.000397724	-0.000484965	0.00130535	0.3542	0.0118494	0.0059887	0.0178201	0	0.0122471	0.00629208	0.0182196	0.032475	-0.0395983	0.106584	0.3542
217	PC(32:1)	0.000565908	-0.000652361	0.00186618	0.3562	0.0116812	0.00572078	0.0178304	0	0.0122471	0.00621933	0.0183636	0.0462075	-0.0532665	0.152377	0.3562
357	LPC(P-16:0)	0.000392306	-0.00046936	0.00139918	0.357	0.0118548	0.00605993	0.0176292	0.0002	0.0122471	0.00625871	0.0182483	0.0320325	-0.0383241	0.114246	0.3568
592	AC(15:0) (b)	-0.000243171	-0.000973018	0.000226631	0.3584	0.0124903	0.0065807	0.0184567	0.0002	0.0122471	0.00636596	0.0181937	-0.0198554	-0.0794488	0.0185048	0.3586
85	HexCer(d18:1/24:1)	0.000376927	-0.000451452	0.00135155	0.3626	0.0118702	0.0059926	0.0176783	0	0.0122471	0.00625737	0.0181751	0.0307768	-0.0368619	0.110356	0.3626
162	SM(d19:1/24:1)	0.000194396	-0.000182749	0.000810594	0.3626	0.0120527	0.00610407	0.0180166	0	0.0122471	0.00633597	0.0181966	0.0158728	-0.0149218	0.0661866	0.3626
585	FA(22:6)	0.0003531	-0.0004429	0.00128576	0.368	0.011894	0.0060921	0.0179146	0	0.0122471	0.0064545	0.0182294	0.0288313	-0.0361636	0.104985	0.368
330	LPC(20:5) [sn2]	-0.00023241	-0.000938472	0.000230039	0.3694	0.0124795	0.00659859	0.0184676	0	0.0122471	0.00628981	0.0182972	-0.0189767	-0.076628	0.0187831	0.3694
88	HexCer(d18:2/22:0)	0.000311998	-0.000374608	0.00119821	0.3698	0.0119351	0.00609888	0.0179537	0.0002	0.0122471	0.00634971	0.0182931	0.0254753	-0.0305875	0.097836	0.3698
372	PE(16:0_18:3) (b)	-0.000316217	-0.00128194	0.000346251	0.37	0.0125633	0.00667579	0.0185798	0	0.0122471	0.00630987	0.0183491	-0.0258197	-0.104672	0.028272	0.37
360	LPC(P-18:0)	0.000325399	-0.000367959	0.00125495	0.3704	0.0119217	0.00627392	0.0178688	0	0.0122471	0.00640529	0.0183311	0.0265695	-0.0300445	0.102469	0.3704
190	PC(16:1_18:2)	-0.000201958	-0.000871999	0.000185696	0.372	0.0124491	0.0065835	0.0185631	0	0.0122471	0.00638084	0.0183333	-0.0164903	-0.0712004	0.0151625	0.372
203	PC(18:0_22:5) (n3)	-0.000239989	-0.000985629	0.000254402	0.373	0.0124871	0.00657534	0.0184857	0	0.0122471	0.00637604	0.0181682	-0.0195956	-0.0804785	0.0207724	0.373
91	Hex2Cer(d16:1/24:1)	0.000181258	-0.000160363	0.000785788	0.3736	0.0120659	0.0061168	0.0181085	0	0.0122471	0.00630355	0.0183719	0.0148001	-0.0130939	0.0641611	0.3736
412	PE(O-38:5) (a)	0.000202147	-0.000211153	0.00080336	0.3752	0.012045	0.00605279	0.0182297	0	0.0122471	0.00627444	0.0184546	0.0165057	-0.0172411	0.0655959	0.3752
497	PI(18:0_20:2)	-0.000593125	-0.00216156	0.000689535	0.3752	0.0128402	0.00697431	0.0190149	0	0.0122471	0.00628724	0.0184228	-0.0484298	-0.176495	0.0563018	0.3754
410	PE(O-34:1)	0.000268414	-0.00034649	0.000997574	0.3764	0.0119787	0.00617979	0.0179281	0.0002	0.0122471	0.00637793	0.0182513	0.0219165	-0.0282915	0.0814538	0.3766
319	LPC(20:0) [sn1]	0.00023513	-0.000255269	0.000941298	0.3782	0.012012	0.00620879	0.017832	0	0.0122471	0.00634147	0.0181364	0.0191988	-0.0208432	0.0768588	0.3782
631	TG(48:2) [NL-16:1]	-0.000339579	-0.00136768	0.000410023	0.379	0.0125867	0.00666475	0.0185101	0	0.0122471	0.00629308	0.0182911	-0.0277273	-0.111674	0.0334791	0.379
591	AC(15:0) (a)	-0.000405965	-0.00147445	0.000504311	0.3798	0.0126531	0.00668314	0.0186691	0	0.0122471	0.0063665	0.0182128	-0.0331479	-0.120392	0.0411779	0.3798
156	SM(d18:2/18:0)	0.000214629	-0.000251637	0.00089902	0.3814	0.0120325	0.00612302	0.0178537	0.0002	0.0122471	0.00630616	0.0181633	0.0175249	-0.0205466	0.0734067	0.3816
185	PC(16:0_20:3) (a)	0.000346624	-0.000474963	0.00130135	0.386	0.0119005	0.00592414	0.0179719	0.0004	0.0122471	0.00624234	0.018325	0.0283025	-0.0387817	0.106258	0.386
547	CE(20:3)	-0.000526153	-0.00185085	0.000647385	0.3888	0.0127733	0.00697636	0.0186765	0	0.0122471	0.00624376	0.0181769	-0.0429614	-0.151125	0.0528602	0.3888
148	SM(d18:1/20:0)/SM(d16:1/22:0)	0.000274845	-0.000361574	0.00110854	0.389	0.0119723	0.00621377	0.0181132	0	0.0122471	0.00642365	0.0185008	0.0224417	-0.0295232	0.0905145	0.389
9	Cer(d18:0/18:0)	0.000201597	-0.000219791	0.000813138	0.3898	0.0120455	0.00611773	0.018105	0	0.0122471	0.00638479	0.018296	0.0164608	-0.0179463	0.0663943	0.3898
46	Cer(d18:2/22:0)	0.000225545	-0.000243417	0.00089656	0.3902	0.0120216	0.00600719	0.018054	0	0.0122471	0.00621323	0.0183197	0.0184162	-0.0198755	0.0732058	0.3902
42	Cer(d18:2/17:0)	-0.000188838	-0.000787329	0.000216115	0.3954	0.0124359	0.00643895	0.0185957	0	0.0122471	0.00631673	0.0183818	-0.015419	-0.0642869	0.0176462	0.3954
28	Cer(d18:1/14:0)	-0.000212497	-0.000874947	0.000250675	0.3954	0.0124596	0.00666011	0.0186329	0.0002	0.0122471	0.00645217	0.0183266	-0.0173508	-0.0714411	0.0204681	0.3956
644	TG(50:2) [NL-18:1]	-0.000285627	-0.00121795	0.000345025	0.3976	0.0125327	0.00663962	0.0184665	0.0002	0.0122471	0.00629968	0.0181492	-0.023322	-0.0994481	0.0281719	0.3974
427	PE(P-16:0/22:5) (n6)	0.000453119	-0.000617807	0.00157958	0.3978	0.011794	0.00594284	0.0177591	0	0.0122471	0.00629142	0.0182597	0.036998	-0.0504451	0.128976	0.3978
229	PC(38:5) (b)	0.000341527	-0.000517101	0.00127375	0.3978	0.0119056	0.00606442	0.0178634	0.0002	0.0122471	0.00639862	0.0181609	0.0278863	-0.0422223	0.104004	0.3978
563	DE(18:1)	-0.000438252	-0.00170488	0.000582523	0.4012	0.0126854	0.00675778	0.0187321	0	0.0122471	0.00621055	0.0183224	-0.0357841	-0.139207	0.0475641	0.4012
69	Cer(m18:1/18:0)	-0.000242893	-0.00100113	0.000317249	0.4012	0.01249	0.00646528	0.0185333	0.0002	0.0122471	0.00625167	0.0183436	-0.0198327	-0.0817441	0.025904	0.4014
378	PE(16:1_20:4)	0.000361733	-0.00046519	0.00135181	0.4022	0.0118854	0.00600617	0.0178475	0	0.0122471	0.00639576	0.0183009	0.0295362	-0.0379836	0.110378	0.4022
271	PC(P-16:0/22:6)	0.000216661	-0.000219993	0.000966854	0.4028	0.0120304	0.00589695	0.0180351	0.0002	0.0122471	0.00626133	0.0181664	0.0176908	-0.0179628	0.0789455	0.403
418	PE(P-16:0/18:1)	0.000323117	-0.000479526	0.00118935	0.4068	0.011924	0.00604853	0.0178535	0	0.0122471	0.00627514	0.0182269	0.0263831	-0.0391542	0.0971127	0.4068
329	LPC(20:5) [sn1]	-0.00028991	-0.00115157	0.000383185	0.4098	0.012537	0.00670794	0.0185236	0	0.0122471	0.00635103	0.0182172	-0.0236717	-0.0940275	0.0312878	0.4098
532	PG(36:2)	-0.000419753	-0.00169562	0.000607206	0.4108	0.0126669	0.00689839	0.0186809	0	0.0122471	0.00633755	0.0183301	-0.0342737	-0.138451	0.0495795	0.411
261	PC(P-15:0/20:4) (b)	0.000176987	-0.000216931	0.000742122	0.4198	0.0120701	0.00611971	0.0183227	0.0004	0.0122471	0.00631894	0.0185237	0.0144514	-0.0177128	0.0605957	0.4198
498	PI(18:0_20:3) (a)	0.000238298	-0.000334833	0.00102942	0.4202	0.0120088	0.00622584	0.0181132	0	0.0122471	0.00650296	0.0183156	0.0194575	-0.0273397	0.0840542	0.4202
611	DG(18:0_18:2)	-0.00033875	-0.00131537	0.000494548	0.4256	0.0125859	0.00657433	0.0184966	0	0.0122471	0.00625378	0.0181607	-0.0276596	-0.107403	0.0403808	0.4256
331	LPC(22:0) [sn1]	-0.000189294	-0.000850695	0.000231621	0.4258	0.0124364	0.00635072	0.0183923	0	0.0122471	0.0061587	0.0181714	-0.0154562	-0.0694609	0.0189123	0.4258
725	CE(18:2) [+OH]	0.000252419	-0.000386153	0.000967676	0.4258	0.0119947	0.00606793	0.0181259	0.0002	0.0122471	0.00631792	0.0183522	0.0206105	-0.0315302	0.0790126	0.426
5	S1P(d18:0)	0.00017683	-0.000270246	0.000722845	0.4306	0.0120703	0.00605516	0.0180163	0	0.0122471	0.00623436	0.018186	0.0144385	-0.0220661	0.0590217	0.4306
405	PE(O-18:0/20:4)	0.000230998	-0.000373677	0.000948888	0.431	0.0120161	0.00606508	0.0181344	0.0002	0.0122471	0.00626327	0.0182742	0.0188614	-0.0305114	0.0774785	0.4312
728	LPC(18:2) [+OH]	-0.000302541	-0.00124995	0.000492878	0.4336	0.0125497	0.00668679	0.0185584	0	0.0122471	0.00622384	0.0183546	-0.0247031	-0.102061	0.0402444	0.4336
74	Cer(m18:1/24:1)	-0.000192965	-0.000803002	0.000291295	0.4358	0.0124401	0.0065249	0.0184004	0	0.0122471	0.00626568	0.0181887	-0.015756	-0.0655667	0.0237848	0.4358
149	SM(d18:1/22:0)/SM(d16:1/24:0)	0.000261105	-0.000414061	0.00112569	0.4422	0.011986	0.00610086	0.017857	0.0002	0.0122471	0.00626939	0.0182231	0.0213197	-0.0338089	0.0919146	0.4422
428	PE(P-16:0/22:6)	-0.00032487	-0.00128521	0.000546473	0.4418	0.012572	0.00677017	0.0184673	0	0.0122471	0.00631438	0.0183116	-0.0265263	-0.10494	0.0446206	0.4422
456	PE(P-18:1/22:4)	0.000209159	-0.000333319	0.000870188	0.4438	0.012038	0.00617207	0.0179429	0.0002	0.0122471	0.0062998	0.0182178	0.0170782	-0.0272161	0.0710525	0.4436
597	AC(18:0)	-0.000173379	-0.000860784	0.000222789	0.4458	0.0124205	0.00646489	0.0183546	0	0.0122471	0.00631896	0.0181873	-0.0141567	-0.0702846	0.0181912	0.4458
454	PE(P-18:1/20:5) (a)	0.00016547	-0.000240087	0.000687816	0.4462	0.0120816	0.00596829	0.0180873	0.0002	0.0122471	0.00612306	0.0182005	0.0135109	-0.0196036	0.0561615	0.4462
401	PE(O-16:0/20:3)	0.000185635	-0.000252316	0.000785016	0.4468	0.0120615	0.00619396	0.0180761	0	0.0122471	0.00642324	0.0182057	0.0151575	-0.0206021	0.0640981	0.4468
539	CE(17:1)	-0.000209633	-0.000894551	0.000302791	0.4468	0.0124567	0.00654655	0.0184297	0	0.0122471	0.0063116	0.0180971	-0.0171169	-0.0730418	0.0247234	0.4468
277	PC(P-18:0/22:6)	0.000214217	-0.000324682	0.00100159	0.4472	0.0120329	0.00605208	0.0180585	0	0.0122471	0.00631233	0.0182406	0.0174912	-0.0265109	0.0817816	0.4472
652	TG(50:4) [NL-18:3]	-0.000528158	-0.00217203	0.000795672	0.4506	0.0127753	0.00722626	0.0185291	0	0.0122471	0.00647595	0.0182696	-0.0431251	-0.17735	0.0649682	0.4506
702	TG(58:8) [NL-22:6]	-0.000613076	-0.00236027	0.000987408	0.4566	0.0128602	0.0073523	0.0185961	0	0.0122471	0.00638015	0.0181487	-0.0500588	-0.192721	0.0806238	0.4566
605	DG(16:0_18:2)	-0.000479332	-0.00186768	0.000782245	0.4638	0.0127264	0.00691395	0.0187274	0.0002	0.0122471	0.00633004	0.0183404	-0.0391384	-0.1525	0.0638718	0.464
184	PC(16:0_18:3) (b)	-0.000403371	-0.00174823	0.000653408	0.4648	0.0126505	0.00653876	0.0187941	0	0.0122471	0.00616453	0.0183676	-0.032936	-0.142746	0.0533521	0.4648
572	FA(16:2)	-0.000178236	-0.000882383	0.000275753	0.4684	0.0124253	0.00644627	0.0184402	0	0.0122471	0.00632534	0.0182315	-0.0145533	-0.0720483	0.0225157	0.4684
362	LPC(P-20:0)	0.000277459	-0.000499612	0.00117909	0.4696	0.0119697	0.00607305	0.0179025	0	0.0122471	0.00631803	0.0183134	0.0226551	-0.0407943	0.0962749	0.4696
561	COH	-0.00014721	-0.000722061	0.000208458	0.472	0.0123943	0.00641647	0.0182129	0	0.0122471	0.00627524	0.0180892	-0.01202	-0.0589577	0.017021	0.472
273	PC(P-17:0/20:4) (b)	0.000267767	-0.000468	0.00113742	0.472	0.0119793	0.00595452	0.0178287	0.0002	0.0122471	0.00618007	0.0181504	0.0218637	-0.0382131	0.0928724	0.4722
40	Cer(d18:2/14:0)	-0.000241494	-0.00102479	0.000450974	0.475	0.0124886	0.00662965	0.0184711	0	0.0122471	0.00638956	0.0182872	-0.0197184	-0.0836762	0.0368229	0.475
637	TG(49:1) [NL-17:1]	-0.000152157	-0.000797713	0.000237393	0.4758	0.0123993	0.00642759	0.0185164	0	0.0122471	0.00628658	0.0183366	-0.0124239	-0.0651348	0.0193836	0.4758
651	TG(50:4) [NL-14:0]	0.000587001	-0.00112546	0.00212481	0.4762	0.0116601	0.00606284	0.0174224	0	0.0122471	0.0063432	0.0181739	0.0479298	-0.091896	0.173495	0.4762
671	TG(53:2) [NL-17:1]	-0.000348265	-0.00151479	0.000581674	0.478	0.0125954	0.00666684	0.0188647	0	0.0122471	0.00638522	0.0183451	-0.0284365	-0.123685	0.0474948	0.478
280	PC(P-20:0/20:4)	-0.000186855	-0.0008133	0.000261451	0.4786	0.012434	0.00653414	0.0183832	0	0.0122471	0.00634457	0.0182431	-0.0152571	-0.0664075	0.0213479	0.4788
66	Cer(m18:0/23:0)	0.000147449	-0.000219146	0.000691976	0.4796	0.0120997	0.00621963	0.0180754	0	0.0122471	0.00634191	0.0182465	0.0120395	-0.0178937	0.0565011	0.4796
705	TG(O-50:1) [NL-16:0]	-0.000159337	-0.000830354	0.000245336	0.4834	0.0124064	0.00651915	0.0183972	0	0.0122471	0.00625673	0.0182543	-0.0130102	-0.0678	0.0200321	0.4834
129	SM(43:1)	-0.000174896	-0.000848075	0.000321563	0.489	0.012422	0.00652836	0.0184318	0.0002	0.0122471	0.00636218	0.0182849	-0.0142806	-0.069247	0.0262562	0.4892
381	PE(17:0_20:4)	-0.000255736	-0.00123675	0.000437146	0.4904	0.0125028	0.00661589	0.0184367	0.0002	0.0122471	0.0063478	0.0181142	-0.0208814	-0.100983	0.0356938	0.4906
490	PI(16:0_20:3) (a)	-0.00017031	-0.000886177	0.000252979	0.4952	0.0124174	0.00666097	0.0183599	0.0002	0.0122471	0.0064593	0.0181844	-0.0139061	-0.0723581	0.0206562	0.4954
76	HexCer(d16:1/18:0)	-0.000139151	-0.000687213	0.000217391	0.496	0.0123863	0.00634018	0.0184394	0	0.0122471	0.0062688	0.0182453	-0.011362	-0.0561123	0.0177504	0.496
6	S1P(d18:1)	0.000133136	-0.000255258	0.000596344	0.508	0.012114	0.00596113	0.0181553	0	0.0122471	0.0060283	0.0182953	0.0108708	-0.0208423	0.0486926	0.508
610	DG(18:0_18:1)	-0.00014459	-0.000764702	0.000289927	0.5096	0.0123917	0.00632577	0.0184119	0.0002	0.0122471	0.00619077	0.0182124	-0.0118061	-0.0624394	0.0236731	0.5094
249	PC(O-32:2)	-0.000141098	-0.000708221	0.000282313	0.513	0.0123882	0.00653186	0.018378	0	0.0122471	0.00631763	0.0182434	-0.0115209	-0.0578276	0.0230514	0.513
686	TG(54:6) [NL-22:6]	0.000591064	-0.00130042	0.00242382	0.5138	0.011656	0.00593015	0.0175258	0	0.0122471	0.00632697	0.0183511	0.0482615	-0.106181	0.19791	0.5138
394	PE(18:1_22:6) (a)	0.000140075	-0.000234704	0.000702896	0.5186	0.012107	0.00588994	0.0182303	0.0002	0.0122471	0.00605866	0.0183785	0.0114374	-0.019164	0.0573928	0.5188
30	Cer(d18:1/17:0)	0.000175243	-0.000275121	0.000911297	0.5224	0.0120719	0.00604818	0.017924	0.0002	0.0122471	0.0063132	0.0180724	0.0143089	-0.0224642	0.0744091	0.5222
57	Cer(d19:1/24:1)	0.000123768	-0.00021964	0.000650362	0.5226	0.0121233	0.0061887	0.0180488	0.0002	0.0122471	0.00633275	0.0181615	0.0101059	-0.017934	0.0531033	0.5228
240	PC(O-16:0/20:4)	0.000209231	-0.000441148	0.00107684	0.523	0.0120379	0.00629126	0.0179456	0	0.0122471	0.00643075	0.0181887	0.0170841	-0.0360206	0.0879262	0.523
487	PI (38:5) (b)	-0.000169172	-0.000850092	0.000337116	0.5248	0.0124163	0.00634363	0.0183718	0.0002	0.0122471	0.00618128	0.0182237	-0.0138132	-0.0694117	0.0275262	0.5246
112	GM1(d18:1/16:0)	0.000163426	-0.000333644	0.000878311	0.5264	0.0120837	0.00610933	0.0179601	0	0.0122471	0.00623794	0.0181891	0.0133441	-0.0272427	0.0717158	0.5264
243	PC(O-18:0/18:2)	-0.000163573	-0.000834613	0.000349792	0.5276	0.0124107	0.00648235	0.0184589	0	0.0122471	0.00622811	0.0182872	-0.0133561	-0.0681478	0.0285612	0.5278
182	PC(16:0_18:2)	-0.000118492	-0.000641519	0.000204677	0.5294	0.0123656	0.00649441	0.0182766	0	0.0122471	0.00637198	0.0181211	-0.00967506	-0.0523813	0.0167123	0.5294
443	PE(P-18:0/22:6)	-0.000123501	-0.000648137	0.000212956	0.5304	0.0123706	0.00649829	0.0184317	0	0.0122471	0.00641761	0.0183325	-0.0100841	-0.0529216	0.0173883	0.5304
259	PC(O-40:7) (b)	0.000119421	-0.000214955	0.000673014	0.5314	0.0121277	0.00621578	0.0181621	0.0002	0.0122471	0.00634538	0.018245	0.00975099	-0.0175515	0.0549529	0.5316
130	SM(43:2) (b)	0.000119556	-0.000220816	0.000626917	0.5332	0.0121276	0.00608866	0.0182313	0	0.0122471	0.00618983	0.0183173	0.00976198	-0.01803	0.051189	0.5332
599	AC(18:2)	0.000128459	-0.000233845	0.000674639	0.5346	0.0121187	0.00625292	0.0183184	0	0.0122471	0.00638647	0.0183912	0.010489	-0.0190939	0.0550856	0.5346
35	Cer(d18:1/22:0)	0.000203007	-0.000482584	0.000976193	0.536	0.0120441	0.0061091	0.0180379	0.0002	0.0122471	0.00618495	0.0183355	0.0165759	-0.0394039	0.079708	0.5362
721	TG(O-54:3) [NL-18:1]	-0.000179491	-0.000909737	0.000428024	0.537	0.0124266	0.00647385	0.0185007	0	0.0122471	0.00632316	0.0182724	-0.0146558	-0.0742818	0.0349489	0.537
108	GM3(d18:1/20:0)	0.000141644	-0.000316952	0.000749646	0.5374	0.0121055	0.00610549	0.0180194	0	0.0122471	0.00629066	0.018228	0.0115655	-0.0258797	0.0612101	0.5374
133	SM(44:2)	0.000124282	-0.000246224	0.000693562	0.5408	0.0121228	0.00622282	0.018097	0	0.0122471	0.00634737	0.0182819	0.0101479	-0.0201047	0.0566306	0.5408
570	FA(16:0)	-0.000120449	-0.000710148	0.000189403	0.541	0.0123676	0.00637351	0.0183732	0	0.0122471	0.00622327	0.0181886	-0.0098349	-0.0579849	0.0154651	0.5412
41	Cer(d18:2/16:0)	0.000153536	-0.000335547	0.000773369	0.5432	0.0120936	0.00637164	0.0180928	0.0002	0.0122471	0.00645683	0.0182997	0.0125365	-0.0273981	0.063147	0.543
700	TG(56:9) [NL-22:6]	0.000639258	-0.0015149	0.00272059	0.5462	0.0116079	0.00622171	0.0174575	0	0.0122471	0.00640742	0.0184129	0.0521966	-0.123695	0.222142	0.5462
511	PI(38:5) (a)	-0.000140861	-0.000752204	0.000283031	0.5464	0.012388	0.00653283	0.0184574	0.0002	0.0122471	0.00646661	0.0182731	-0.0115016	-0.0614189	0.02311	0.5462
707	TG(O-50:1) [NL-18:1]	-0.000114043	-0.00065766	0.000219984	0.5466	0.0123612	0.00657738	0.018355	0	0.0122471	0.00642977	0.0182269	-0.00931182	-0.0536992	0.0179621	0.5466
223	PC(34:5)	0.000174533	-0.000413748	0.000875841	0.5486	0.0120726	0.00624105	0.0180565	0	0.0122471	0.00643321	0.0181963	0.0142509	-0.0337833	0.0715141	0.5486
411	PE(O-36:5)	0.000121963	-0.000223106	0.000653611	0.55	0.0121251	0.00634776	0.0181304	0	0.0122471	0.00641402	0.0182739	0.00995853	-0.018217	0.0533686	0.55
714	TG(O-52:1) [NL-18:1]	0.000133844	-0.00029883	0.000706842	0.5502	0.0121133	0.00614414	0.0182612	0	0.0122471	0.00628001	0.0183747	0.0109286	-0.0244001	0.057715	0.5502
667	TG(52:4) [NL-18:3]	-0.00036782	-0.0017989	0.000775411	0.551	0.0126149	0.00697335	0.0185281	0	0.0122471	0.00629573	0.0182055	-0.0300332	-0.146884	0.0633138	0.551
314	LPC(19:0) [sn1] (b)	-0.000126678	-0.000730491	0.000239888	0.5524	0.0123738	0.00633065	0.0182717	0.0002	0.0122471	0.0062006	0.0181582	-0.0103435	-0.059646	0.0195873	0.5526
143	SM(d18:0/22:0)	-0.000252958	-0.00123265	0.000578794	0.56	0.0125001	0.00659772	0.0185273	0.0002	0.0122471	0.00636189	0.0183078	-0.0206545	-0.100648	0.0472597	0.5602
393	PE(18:1_18:2)	-0.000134607	-0.000788698	0.000308184	0.5606	0.0123817	0.0064229	0.0183087	0	0.0122471	0.00629634	0.0181514	-0.0109909	-0.0643987	0.0251638	0.5606
685	TG(54:6) [NL-20:5]	-0.000550101	-0.00250927	0.00128159	0.5612	0.0127972	0.00725592	0.0187957	0	0.0122471	0.0062574	0.0183467	-0.0449168	-0.204887	0.104644	0.5612
324	LPC(20:2) [sn2]	-0.000640707	-0.00295511	0.00147734	0.564	0.0128878	0.00722737	0.0188051	0	0.0122471	0.0064061	0.0181567	-0.052315	-0.24129	0.120628	0.564
464	PE(P-20:0/18:2)	0.000171397	-0.000462129	0.000868148	0.5668	0.0120757	0.00595967	0.0181729	0	0.0122471	0.00622624	0.0182856	0.0139949	-0.0377337	0.070886	0.5668
541	CE(18:1)	-0.00029383	-0.00144917	0.000699076	0.5676	0.0125409	0.00679309	0.0185812	0.0002	0.0122471	0.00640886	0.0182601	-0.0239918	-0.118328	0.0570809	0.5678
228	PC(38:5) (a)	0.000184228	-0.000497733	0.000988227	0.571	0.0120629	0.00611188	0.0180367	0	0.0122471	0.00632206	0.0181727	0.0150426	-0.0406408	0.0806906	0.5708
432	PE(P-17:0/22:6) (b)	0.000127998	-0.000290428	0.00067435	0.5732	0.0121191	0.00607493	0.0182486	0	0.0122471	0.00622051	0.0183192	0.0104513	-0.023714	0.055062	0.5732
635	TG(48:3) [NL-18:3]	0.000322099	-0.000956787	0.0014766	0.5742	0.011925	0.0062632	0.0179022	0.0002	0.0122471	0.00636354	0.0182562	0.0263	-0.0781235	0.120567	0.574
173	PC(15-MHDA_18:2)	0.000104575	-0.000233064	0.000616348	0.5776	0.0121425	0.00625987	0.0181758	0	0.0122471	0.00634427	0.0183013	0.00853876	-0.0190301	0.050326	0.5776
245	PC(O-18:0/22:6)	0.000125778	-0.000260929	0.000744541	0.5808	0.0121213	0.00616236	0.0180347	0.0002	0.0122471	0.00628939	0.0182001	0.01027	-0.0213053	0.0607932	0.5808
628	TG(48:1) [NL-18:1]	-0.000110617	-0.000696108	0.000248272	0.5818	0.0123577	0.0064669	0.0182969	0	0.0122471	0.00633314	0.0182355	-0.0090321	-0.0568385	0.0202719	0.5818
595	AC(17:0) (a)	-0.000247861	-0.00127281	0.000630793	0.5818	0.012495	0.00642539	0.0186696	0	0.0122471	0.00628159	0.0182626	-0.0202383	-0.103928	0.0515054	0.5818
699	TG(56:8) [NL-22:6]	0.000606412	-0.0016356	0.00279811	0.5822	0.0116407	0.00622572	0.0173452	0	0.0122471	0.00639284	0.0182548	0.0495147	-0.13355	0.228471	0.5822
580	FA(20:3)	0.000152224	-0.000365963	0.000787673	0.5826	0.0120949	0.00623502	0.0180869	0	0.0122471	0.00630012	0.0182381	0.0124294	-0.0298816	0.064315	0.5826
708	TG(O-50:2) [NL-16:1]	0.000143379	-0.000423276	0.000797377	0.5844	0.0121037	0.00623286	0.0179817	0	0.0122471	0.00638958	0.0181727	0.0117071	-0.0345613	0.0651074	0.5844
388	PE(18:0_22:4)	-0.000110492	-0.000700494	0.000230073	0.5868	0.0123576	0.00646945	0.0184864	0	0.0122471	0.00636036	0.0183936	-0.00902188	-0.0571966	0.0187859	0.5868
94	Hex2Cer(d18:1/20:0)	0.000119516	-0.000257642	0.00068116	0.589	0.0121276	0.00641467	0.0180212	0	0.0122471	0.00641466	0.0181893	0.00975869	-0.021037	0.055618	0.589
189	PC(16:0_22:6)	0.0001379	-0.000364596	0.000791305	0.5902	0.0121092	0.00625855	0.0181482	0	0.0122471	0.00636817	0.0182984	0.0112598	-0.0297699	0.0646116	0.5902
556	CE(24:0)	-0.00010634	-0.000650023	0.000268401	0.5914	0.0123534	0.00656341	0.0183678	0.0002	0.0122471	0.0064812	0.0181823	-0.00868286	-0.0530756	0.0219155	0.5912
492	PI(16:0_20:4)	0.000106814	-0.000250024	0.000651672	0.5924	0.0121403	0.00622129	0.0181396	0	0.0122471	0.00630282	0.0182374	0.00872155	-0.020415	0.0532103	0.5924
499	PI(18:0_20:3) (b)	0.000569248	-0.00154384	0.00244028	0.5948	0.0116779	0.00588911	0.0178249	0.0002	0.0122471	0.00633806	0.0183067	0.0464801	-0.126057	0.199253	0.5944
51	Cer(d19:1/16:0)	0.000113721	-0.000245134	0.000648715	0.5956	0.0121334	0.00621541	0.0182088	0	0.0122471	0.00640048	0.018283	0.00928557	-0.0200157	0.0529688	0.5956
93	Hex2Cer(d18:1/18:0)	-0.000123946	-0.000731328	0.000313297	0.5964	0.0123711	0.00648173	0.0184209	0	0.0122471	0.00633298	0.018369	-0.0101204	-0.0597143	0.0255813	0.5964
643	TG(50:2) [NL-16:1]	-0.000203191	-0.00113054	0.000534533	0.597	0.0124503	0.00654809	0.0184368	0	0.0122471	0.00630836	0.0182285	-0.0165909	-0.092311	0.0436457	0.5974
660	TG(52:1) [NL-18:1]	-0.000225403	-0.00117519	0.000608715	0.5994	0.0124725	0.0064547	0.0185748	0	0.0122471	0.00631047	0.0182474	-0.0184046	-0.0959565	0.0497027	0.5996
313	LPC(19:0) [sn1] (a) / LPC(19:0) [sn2] (b)	-0.000115046	-0.000751329	0.00031237	0.5998	0.0123622	0.006527	0.018235	0.0004	0.0122471	0.00640364	0.0181494	-0.0093937	-0.0613474	0.0255056	0.6
170	PC(14:0_20:4)	-0.000177648	-0.000993605	0.000510193	0.6008	0.0124248	0.00665019	0.0182951	0	0.0122471	0.00651413	0.0180941	-0.0145053	-0.0811298	0.0416582	0.6008
722	TG(O-54:4) [NL-17:1]	-0.000151256	-0.000801337	0.000399698	0.6028	0.0123984	0.00639098	0.0184384	0	0.0122471	0.00627671	0.0183002	-0.0123503	-0.0654307	0.0326361	0.6028
82	HexCer(d18:1/20:0)	0.000169781	-0.000507816	0.000977298	0.6032	0.0120773	0.0062304	0.0182451	0.0002	0.0122471	0.00637077	0.0184077	0.0138629	-0.0414641	0.0797983	0.603
430	PE(P-17:0/20:4) (b)	0.000127676	-0.000371193	0.000755913	0.604	0.0121194	0.00633392	0.0181366	0.0002	0.0122471	0.00647728	0.0182182	0.010425	-0.0303086	0.0617218	0.6038
131	SM(43:2) (c)	-0.000106732	-0.000636156	0.000247995	0.6052	0.0123538	0.00649871	0.0184462	0.0002	0.0122471	0.00639302	0.01834	-0.00871488	-0.0519433	0.0202493	0.6054
165	PA(36:2)	-8.84007e-05	-0.000551877	0.000218303	0.606	0.0123355	0.00635268	0.0183781	0	0.0122471	0.00629013	0.0182824	-0.00721809	-0.0450618	0.0178248	0.606
712	TG(O-52:0) [NL-16:0]	0.000183902	-0.000568143	0.000983868	0.6062	0.0120632	0.00612433	0.0182201	0	0.0122471	0.00633452	0.0183665	0.0150159	-0.04639	0.0803347	0.6062
450	PE(P-18:1/20:3) (a)	0.0001178	-0.000278844	0.000652843	0.608	0.0121293	0.00603651	0.0182393	0.0002	0.0122471	0.00615874	0.0183105	0.00961861	-0.0227681	0.0533059	0.6082
359	LPC(P-17:0) (b)	0.000107417	-0.000270627	0.000635889	0.6082	0.0121397	0.00636417	0.0180437	0	0.0122471	0.00642193	0.0181582	0.00877083	-0.0220972	0.0519216	0.6082
180	PC(16:0_18:0)	9.81128e-05	-0.000231953	0.000632353	0.6086	0.012149	0.00627676	0.0181739	0	0.0122471	0.00635305	0.0182823	0.0080111	-0.0189394	0.0516328	0.6086
213	PC(20:0_20:4)	-0.000117205	-0.00065596	0.000283004	0.6086	0.0123643	0.0066299	0.0183576	0	0.0122471	0.00648134	0.0183033	-0.00957	-0.0535604	0.0231078	0.6086
197	PC(17:1_18:2)	0.000135594	-0.000380134	0.000800539	0.6108	0.0121115	0.00618959	0.0180374	0.0002	0.0122471	0.00635637	0.0182596	0.0110715	-0.0310386	0.0653656	0.6106
500	PI(18:0_20:4)	-0.000121658	-0.000676219	0.000301845	0.6116	0.0123688	0.00629115	0.0184809	0.0002	0.0122471	0.00619512	0.0182829	-0.0099336	-0.0552146	0.0246462	0.612
255	PC(O-36:5)	0.000129355	-0.000376974	0.000710281	0.6124	0.0121178	0.00618913	0.018222	0.0002	0.0122471	0.00632274	0.0182734	0.0105621	-0.0307807	0.0579958	0.6122
632	TG(48:2) [NL-18:2]	0.000269163	-0.000905083	0.00136625	0.6128	0.0119779	0.0061938	0.0178923	0	0.0122471	0.00630574	0.0183097	0.0219777	-0.0739018	0.111557	0.6128
289	LPC(15-MHDA) [sn1] / LPC(17:0) [sn2]	0.000174376	-0.000546456	0.00098209	0.614	0.0120727	0.00601008	0.0182394	0	0.0122471	0.00621413	0.0183766	0.0142381	-0.0446191	0.0801896	0.614
650	TG(50:3) [NL-18:3]	-0.000337679	-0.0017004	0.000810375	0.6146	0.0125848	0.00689231	0.018526	0	0.0122471	0.00634105	0.0181774	-0.0275722	-0.138841	0.0661687	0.6148
323	LPC(20:2) [sn1]	-0.000586558	-0.00303183	0.0016766	0.6164	0.0128337	0.00728587	0.0187237	0	0.0122471	0.00640946	0.0182295	-0.0478936	-0.247555	0.136898	0.6164
135	SM(d16:1/19:0)	-0.000105069	-0.000682015	0.00027256	0.6194	0.0123522	0.00661781	0.0185087	0	0.0122471	0.00648848	0.018387	-0.00857907	-0.0556878	0.022255	0.6194
617	DG(18:1_20:3)	0.000156598	-0.000541337	0.000859594	0.6204	0.0120905	0.00613442	0.0183422	0	0.0122471	0.00631129	0.0184589	0.0127866	-0.0442012	0.0701875	0.6204
698	TG(56:8) [NL-20:5]	-0.000472523	-0.00253275	0.00138483	0.6244	0.0127196	0.00701562	0.0186101	0	0.0122471	0.0062973	0.0181452	-0.0385824	-0.206804	0.113074	0.6244
431	PE(P-17:0/22:6) (a)	9.68152e-05	-0.000237404	0.000580387	0.6268	0.0121503	0.00624736	0.0182408	0	0.0122471	0.00641519	0.018308	0.00790515	-0.0193845	0.0473897	0.6268
730	LPC(22:6) [+OH]	0.000176652	-0.00061068	0.00102082	0.6282	0.0120705	0.0063836	0.0179888	0.0002	0.0122471	0.0064054	0.018329	0.014424	-0.0498632	0.0833516	0.628
95	Hex2Cer(d18:1/22:0)	0.000109388	-0.000347323	0.000711198	0.6282	0.0121377	0.00637139	0.018207	0.0002	0.0122471	0.00643056	0.0183629	0.00893177	-0.0283596	0.0580707	0.628
421	PE(P-16:0/20:3) (a)	-9.54997e-05	-0.000652339	0.000259341	0.6282	0.0123426	0.00634898	0.0184514	0	0.0122471	0.00627338	0.0183324	-0.00779774	-0.0532647	0.0211757	0.6282
732	PC(36:4) [+OH]	0.000101186	-0.000305667	0.000666455	0.629	0.0121459	0.00626269	0.0181212	0.0002	0.0122471	0.00634999	0.0182832	0.00826201	-0.0249583	0.0544173	0.6288
576	FA(18:1)	0.000156035	-0.000532426	0.000859665	0.6296	0.0120911	0.00617587	0.0181697	0	0.0122471	0.00633668	0.0182282	0.0127405	-0.0434736	0.0701933	0.6296
398	PE(38:5) (a)	9.96808e-05	-0.000239809	0.000581889	0.6302	0.0121474	0.00626465	0.0181147	0	0.0122471	0.00637694	0.0182014	0.00813913	-0.0195809	0.0475124	0.6302
550	CE(22:0)	-0.00010128	-0.000715796	0.00031929	0.6324	0.0123484	0.00639416	0.0183451	0.0002	0.0122471	0.0063194	0.0181516	-0.00826968	-0.0584461	0.0260706	0.6322
598	AC(18:1)	0.000174495	-0.000653409	0.0010317	0.6324	0.0120726	0.00630098	0.0181772	0	0.0122471	0.00643324	0.0183669	0.0142479	-0.0533521	0.0842403	0.6324
288	LPC(15-MHDA) [sn1] [104_sn1]	0.000153007	-0.000503891	0.000920664	0.6326	0.0120941	0.00609034	0.0181466	0	0.0122471	0.00625106	0.0183013	0.0124933	-0.0411436	0.075174	0.6326
519	LPI(18:2) [sn1]	0.000109753	-0.000302135	0.000635131	0.6324	0.0121374	0.00624094	0.0182432	0.0002	0.0122471	0.00641328	0.0183014	0.00896156	-0.0246699	0.0518597	0.6326
70	Cer(m18:1/20:0)	-0.000159304	-0.00083076	0.000538059	0.635	0.0124064	0.00637404	0.0182308	0	0.0122471	0.00622824	0.0181562	-0.0130075	-0.0678331	0.0439335	0.635
461	PE(P-19:0/20:4) (a)	-0.000101522	-0.000676006	0.000339212	0.6368	0.0123486	0.00641577	0.0183868	0	0.0122471	0.00626693	0.0183246	-0.00828944	-0.0551972	0.0276973	0.6368
264	PC(P-16:0/16:1)	0.000171588	-0.000589175	0.00106987	0.6406	0.0120755	0.00621932	0.0180349	0.0004	0.0122471	0.00643304	0.0181606	0.0140105	-0.0481073	0.0873572	0.641
731	PC(34:2) [+OH]	0.000118558	-0.000394929	0.000626226	0.645	0.0121286	0.00621294	0.0182798	0	0.0122471	0.00632627	0.0182877	0.00968051	-0.0322467	0.0511326	0.645
382	PE(17:0_22:6)	-0.000286331	-0.00166812	0.000902633	0.6452	0.0125334	0.00657648	0.0186665	0	0.0122471	0.0062884	0.0182935	-0.0233795	-0.136205	0.0737017	0.6452
379	PE(17:0_18:1)	-8.20668e-05	-0.000616628	0.000241213	0.6468	0.0123292	0.0064425	0.0183352	0	0.0122471	0.00633291	0.0181742	-0.00670091	-0.0503488	0.0196955	0.6468
187	PC(16:0_20:4)	-0.000154956	-0.000963576	0.000499154	0.6468	0.0124021	0.00641804	0.018302	0	0.0122471	0.00630087	0.0181609	-0.0126525	-0.0786778	0.0407569	0.6468
343	LPC(24:0) [sn1]	0.000108862	-0.000343657	0.000710563	0.647	0.0121382	0.00608355	0.0182085	0	0.0122471	0.00624281	0.0182323	0.00888881	-0.0280602	0.0580188	0.647
460	PE(P-18:1/22:6) (b)	-6.99032e-05	-0.000539428	0.000208253	0.6488	0.012317	0.00646688	0.0182783	0	0.0122471	0.00634864	0.0181902	-0.00570773	-0.0440453	0.0170043	0.6488
222	PC(33:2)	9.87755e-05	-0.000343095	0.000662336	0.6558	0.0121483	0.00617515	0.0181508	0.0004	0.0122471	0.00629062	0.018247	0.00806521	-0.0280144	0.054081	0.6558
161	SM(d18:2/24:0)	7.79578e-05	-0.000235112	0.000620965	0.6562	0.0121692	0.00630016	0.0181839	0	0.0122471	0.00641264	0.0182679	0.0063654	-0.0191973	0.050703	0.6562
140	SM(d17:1/24:1)	8.02483e-05	-0.000269406	0.000578856	0.6566	0.0121669	0.00623463	0.0183453	0	0.0122471	0.00633175	0.0184669	0.00655243	-0.0219975	0.0472647	0.6566
486	LPE(P-20:0)	0.000137255	-0.000509333	0.000856761	0.659	0.0121099	0.0064314	0.0180474	0	0.0122471	0.00648829	0.0182638	0.0112071	-0.041588	0.0699562	0.659
453	PE(P-18:1/20:4) (b)	8.75438e-05	-0.000310762	0.000537763	0.66	0.0121596	0.00627789	0.0181511	0.0002	0.0122471	0.00638599	0.0181537	0.00714812	-0.0253743	0.0439094	0.6602
286	LPC(14:0) [sn1]	-0.000250188	-0.00143441	0.000837046	0.6606	0.0124973	0.00675545	0.0185	0	0.0122471	0.00636655	0.0184322	-0.0204284	-0.117122	0.0683464	0.6608
60	Cer(d20:1/23:0)	-8.37974e-05	-0.000568573	0.000244853	0.6618	0.0123309	0.00652879	0.0185259	0	0.0122471	0.00643031	0.018459	-0.00684222	-0.0464251	0.0199927	0.6618
441	PE(P-18:0/22:5) (n3)	8.75816e-05	-0.000326524	0.000526033	0.6706	0.0121595	0.0062377	0.0181139	0	0.0122471	0.00633549	0.0181542	0.0071512	-0.0266613	0.0429516	0.6706
544	CE(20:0)	-9.91778e-05	-0.000664306	0.000338359	0.6708	0.0123463	0.00630901	0.0184076	0	0.0122471	0.00628649	0.0182284	-0.00809806	-0.0542418	0.0276276	0.6708
183	PC(16:0_18:3) (a)	-7.91573e-05	-0.000595468	0.00027628	0.672	0.0123263	0.00643285	0.0183119	0.0004	0.0122471	0.00633721	0.0182329	-0.00646334	-0.0486211	0.0225588	0.6716
37	Cer(d18:1/24:0)	0.000101471	-0.000349103	0.000670795	0.6726	0.0121456	0.00625628	0.0181807	0	0.0122471	0.00639997	0.0182587	0.00828533	-0.0285049	0.0547717	0.6726
688	TG(54:7) [NL-22:6]	-0.000394699	-0.00237697	0.00143031	0.673	0.0126418	0.00721477	0.0184544	0	0.0122471	0.0064523	0.018312	-0.032228	-0.194084	0.116787	0.673
53	Cer(d19:1/20:0)	8.23739e-05	-0.000266985	0.000597339	0.675	0.0121647	0.0063186	0.0182478	0	0.0122471	0.00644486	0.0182503	0.00672599	-0.0217998	0.0487739	0.675
377	PE(16:1_18:2)	-0.000115397	-0.000826803	0.000427968	0.6762	0.0123625	0.00641796	0.0183007	0	0.0122471	0.00627641	0.0182467	-0.0094224	-0.0675101	0.0349444	0.6762
515	LPI(18:0) [sn1]	0.000129688	-0.00052922	0.000830819	0.6782	0.0121174	0.00622296	0.0182101	0	0.0122471	0.00636332	0.0182513	0.0105893	-0.0432118	0.067838	0.6782
194	PC(17:0_18:2)	7.21149e-05	-0.000218188	0.000495763	0.6796	0.012175	0.0061857	0.0183083	0	0.0122471	0.00629099	0.0183667	0.00588832	-0.0178154	0.04048	0.6796
89	HexCer(d18:2/24:0)	0.000106951	-0.000466625	0.000787475	0.68	0.0121402	0.00628601	0.0181203	0.0002	0.0122471	0.0062935	0.0182387	0.00873279	-0.0381008	0.0642988	0.6802
510	PI(37:6)	7.08761e-05	-0.000229167	0.000542802	0.6846	0.0121762	0.00615014	0.0182658	0	0.0122471	0.00621095	0.0182929	0.00578717	-0.018712	0.0443208	0.6846
433	PE(P-18:0/18:1)	9.43934e-05	-0.000320804	0.000603792	0.688	0.0121527	0.00621298	0.0181283	0	0.0122471	0.00627715	0.0182603	0.0077074	-0.0261943	0.0493008	0.688
101	Hex3Cer(d18:1/18:0)	7.72153e-05	-0.000240167	0.000568493	0.6894	0.0121699	0.00628242	0.0182513	0	0.0122471	0.0063695	0.0182957	0.00630478	-0.0196101	0.0464186	0.6894
236	PC(40:8)	0.000215294	-0.000946505	0.00143661	0.6904	0.0120318	0.00639002	0.0179339	0	0.0122471	0.00642976	0.0182965	0.0175792	-0.077284	0.117302	0.6904
151	SM(d18:1/24:0)	7.33897e-05	-0.000319636	0.000663022	0.6908	0.0121737	0.00619738	0.0180963	0	0.0122471	0.00629306	0.0181806	0.00599241	-0.0260989	0.054137	0.6908
251	PC(O-34:2)	-0.000152101	-0.000946956	0.000586093	0.693	0.0123992	0.00637295	0.0181816	0	0.0122471	0.0062712	0.0180777	-0.0124194	-0.0773207	0.0478556	0.693
560	CE(24:6)	-0.000215085	-0.00141276	0.000960846	0.6936	0.0124622	0.00634886	0.0186248	0	0.0122471	0.00639027	0.0182318	-0.0175621	-0.115355	0.078455	0.6936
400	PE(O-16:0/18:2)	-5.6083e-05	-0.000494906	0.000199233	0.6978	0.0123032	0.00641142	0.0182611	0	0.0122471	0.00643222	0.0181781	-0.00457928	-0.04041	0.0162678	0.6978
200	PC(18:0_20:3)	0.000102571	-0.000448446	0.000764862	0.6982	0.0121445	0.00629846	0.0182185	0	0.0122471	0.00640525	0.0183677	0.0083751	-0.0366165	0.0624525	0.6982
626	TG(48:0) [NL-18:0]	7.31048e-05	-0.000251948	0.00054112	0.7002	0.012174	0.00623243	0.0180916	0.0006	0.0122471	0.00628766	0.0181725	0.00596915	-0.020572	0.0441835	0.7008
315	LPC(19:0) [sn2] (a)	-9.85923e-05	-0.000733818	0.000423906	0.7008	0.0123457	0.00647497	0.0183892	0	0.0122471	0.00639869	0.0182979	-0.00805025	-0.0599176	0.0346127	0.7008
392	PE(18:1_18:1)	8.97802e-05	-0.000322491	0.000574498	0.7014	0.0121573	0.00629863	0.0181132	0.0002	0.0122471	0.00637718	0.018218	0.00733073	-0.026332	0.0469089	0.7012
536	CE(16:1)	-0.000306718	-0.0021508	0.00137179	0.7046	0.0125538	0.00662247	0.0187497	0	0.0122471	0.00630259	0.0183502	-0.0250441	-0.175617	0.112009	0.7046
517	LPI(18:1) [sn1]	0.000197285	-0.000853193	0.00118775	0.7054	0.0120498	0.00612775	0.017982	0	0.0122471	0.0062152	0.0183125	0.0161087	-0.0696648	0.0969817	0.7054
368	PE(16:0_16:1)	0.000136236	-0.000638076	0.000929215	0.7074	0.0121109	0.00634899	0.0182919	0	0.0122471	0.00648684	0.0183953	0.0111239	-0.0521001	0.0758722	0.7074
462	PE(P-19:0/20:4) (b)	-7.46111e-05	-0.000570671	0.000275017	0.7094	0.0123217	0.00642887	0.0185286	0	0.0122471	0.00634692	0.0185024	-0.00609214	-0.0465963	0.0224557	0.7094
619	DG(18:1_20:5)	0.000315429	-0.0014447	0.00205311	0.7102	0.0119317	0.00621243	0.0179905	0	0.0122471	0.00645101	0.0183893	0.0257554	-0.117962	0.167641	0.71
248	PC(O-32:1)	-0.00010114	-0.000786354	0.000437047	0.7124	0.0123482	0.00645962	0.0184478	0	0.0122471	0.00634324	0.0183298	-0.00825824	-0.0642073	0.0356858	0.7124
625	TG(48:0) [NL-16:0]	-7.90734e-05	-0.000671997	0.000378887	0.7134	0.0123262	0.00626915	0.0183835	0	0.0122471	0.00618297	0.0182621	-0.00645649	-0.0548698	0.0309368	0.7134
646	TG(50:3) [NL-14:0]	0.000221358	-0.00105372	0.00142115	0.7154	0.0120258	0.00640089	0.0176854	0	0.0122471	0.00631308	0.0181454	0.0180743	-0.0860383	0.11604	0.7154
668	TG(52:5) [NL-18:3]	-0.000308747	-0.00204434	0.00123605	0.716	0.0125559	0.00698582	0.0183534	0	0.0122471	0.00633875	0.0181872	-0.0252098	-0.166924	0.100926	0.716
512	PI(38:6)	0.000174482	-0.000806448	0.0011373	0.7172	0.0120726	0.00618262	0.0181153	0	0.0122471	0.006267	0.0182863	0.0142468	-0.065848	0.0928626	0.7172
320	LPC(20:0) [sn2]	8.57788e-05	-0.000416174	0.000604059	0.7174	0.0121613	0.00636567	0.0181153	0	0.0122471	0.00637612	0.0181957	0.007004	-0.0339814	0.0493226	0.7174
169	PC(14:0_16:0)	-0.000111145	-0.000815005	0.000546742	0.7194	0.0123583	0.00660757	0.0181748	0	0.0122471	0.00652865	0.0180853	-0.00907517	-0.0665467	0.0446425	0.7194
612	DG(18:0_20:4)	-6.02017e-05	-0.000508261	0.000241306	0.7216	0.0123073	0.00650366	0.0184016	0	0.0122471	0.00647247	0.0183312	-0.00491558	-0.0415005	0.0197031	0.7216
414	PE(P-15:0/20:4) (a)	-7.04188e-05	-0.000507324	0.000268275	0.7222	0.0123175	0.00644339	0.0182969	0.0002	0.0122471	0.00640703	0.0182305	-0.00574983	-0.041424	0.0219052	0.7224
356	LPC(O-24:2)	-0.000173799	-0.00124025	0.000853141	0.7246	0.0124209	0.00640142	0.0185115	0.0002	0.0122471	0.00640909	0.0181617	-0.014191	-0.101269	0.0696606	0.7248
122	SM(37:2)	7.75784e-05	-0.000385141	0.000618806	0.7252	0.0121695	0.00618911	0.0181372	0	0.0122471	0.00620508	0.0181934	0.00633442	-0.0314475	0.0505267	0.7252
47	Cer(d18:2/23:0)	-7.25342e-05	-0.000533103	0.000263489	0.7266	0.0123196	0.0063908	0.0182906	0	0.0122471	0.00629726	0.0182082	-0.00592256	-0.0435289	0.0215144	0.7268
38	Cer(d18:1/24:1)	0.000102589	-0.000538629	0.000724757	0.7288	0.0121445	0.00639735	0.0182229	0	0.0122471	0.00637546	0.0183277	0.00837661	-0.0439801	0.0591778	0.7288
527	PS(38:5)	7.47251e-05	-0.000264811	0.000514105	0.7286	0.0121724	0.00621093	0.0181675	0.0002	0.0122471	0.00625736	0.0182483	0.00610145	-0.0216223	0.0419776	0.7288
724	Ubiquinone	8.09091e-05	-0.000306944	0.000590756	0.73	0.0121662	0.00631046	0.0182453	0	0.0122471	0.00638561	0.0183052	0.00660638	-0.0250626	0.0482363	0.73
645	TG(50:2) [NL-18:2]	-0.000203442	-0.00146063	0.000837325	0.732	0.0124506	0.00682063	0.0183734	0	0.0122471	0.00643098	0.0182746	-0.0166114	-0.119263	0.0683692	0.732
447	PE(P-18:1/18:2) (a)	-6.70026e-05	-0.000625883	0.000353382	0.7354	0.0123141	0.00632326	0.018331	0	0.0122471	0.00634493	0.0182263	-0.00547089	-0.0511046	0.0288543	0.7354
232	PC(39:5)(a)	0.000167323	-0.000806688	0.00117848	0.736	0.0120798	0.00633134	0.0180413	0	0.0122471	0.00637377	0.018264	0.0136622	-0.0658677	0.0962251	0.736
87	HexCer(d18:2/20:0)	0.000122703	-0.000724291	0.00090445	0.737	0.0121244	0.00623713	0.0180976	0	0.0122471	0.00631399	0.018281	0.0100189	-0.0591397	0.07385	0.737
124	SM(38:3) (b)	8.42903e-05	-0.000468899	0.000684912	0.737	0.0121628	0.00622569	0.0180768	0	0.0122471	0.0062336	0.0182135	0.00688246	-0.0382865	0.0559244	0.737
621	DG(18:1_22:6)	0.000324553	-0.00164869	0.00227729	0.7372	0.0119226	0.00617761	0.0177464	0	0.0122471	0.00632221	0.0182526	0.0265004	-0.134618	0.185945	0.7372
155	SM(d18:2/17:0)	7.90142e-05	-0.000412412	0.000642185	0.737	0.0121681	0.00618016	0.018152	0.0004	0.0122471	0.00625067	0.0181981	0.00645166	-0.0336742	0.0524356	0.7372
100	Hex3Cer(d18:1/16:0)	6.20373e-05	-0.00029897	0.000523166	0.741	0.0121851	0.00638409	0.0181516	0	0.0122471	0.00641089	0.0182655	0.00506546	-0.0244115	0.0427175	0.741
225	PC(36:6) (a)	8.71788e-05	-0.000473602	0.000701821	0.7438	0.0121599	0.00610813	0.0181144	0	0.0122471	0.00626916	0.0181116	0.00711832	-0.0386705	0.057305	0.7438
202	PC(18:0_22:4)	0.000101024	-0.000539974	0.000843259	0.7444	0.0121461	0.00620156	0.0182601	0	0.0122471	0.00632856	0.0184085	0.0082488	-0.0440899	0.0688537	0.7444
446	PE(P-18:1/18:1) (b)	6.80396e-05	-0.000290244	0.000500299	0.745	0.0121791	0.0062588	0.0181856	0	0.0122471	0.00632658	0.0183152	0.00555556	-0.0236989	0.0408504	0.745
478	LPE(18:2) [sn2]	-0.000288795	-0.00210398	0.00137431	0.7464	0.0125359	0.00680243	0.0183615	0	0.0122471	0.00622871	0.0180891	-0.0235807	-0.171794	0.112215	0.7464
48	Cer(d18:2/24:0)	5.0961e-05	-0.000228513	0.000487643	0.7494	0.0121961	0.00636334	0.0181137	0	0.0122471	0.00642647	0.0181679	0.00416106	-0.0186585	0.039817	0.7494
326	LPC(20:3) [sn2]	0.000259603	-0.00150638	0.0020598	0.7504	0.0119875	0.00617161	0.0177744	0	0.0122471	0.00620891	0.0181198	0.0211971	-0.122999	0.168186	0.7504
45	Cer(d18:2/21:0)	6.98715e-05	-0.000319132	0.000547976	0.7504	0.0121772	0.00635255	0.0181842	0	0.0122471	0.0064449	0.0182025	0.00570514	-0.0260577	0.0447433	0.7504
312	LPC(19:0) (a) [sn1] [104_sn1]	-8.76093e-05	-0.000738484	0.000446656	0.751	0.0123347	0.00624999	0.0183309	0	0.0122471	0.00617538	0.0182357	-0.00715346	-0.0602986	0.0364703	0.751
262	PC(P-16:0/14:0)	-8.97108e-05	-0.000679047	0.000485758	0.7532	0.0123368	0.0064054	0.0182643	0	0.0122471	0.00639169	0.0182202	-0.00732506	-0.0554455	0.0396631	0.7532
1	Sph(d16:1)	9.94817e-05	-0.000624579	0.000809347	0.7554	0.0121476	0.00625833	0.0180267	0.0002	0.0122471	0.00638107	0.018119	0.00812287	-0.0509981	0.0660847	0.7554
14	Cer(d16:1/16:0)	6.43669e-05	-0.000264397	0.000457151	0.7562	0.0121827	0.00639403	0.0182262	0	0.0122471	0.00644838	0.018267	0.00525568	-0.0215886	0.0373273	0.7562
459	PE(P-18:1/22:6) (a)	0.000109971	-0.000614819	0.000944045	0.7576	0.0121371	0.00633679	0.0180944	0.0002	0.0122471	0.00636696	0.0183368	0.00897937	-0.0502011	0.0770831	0.7576
171	PC(14:0_22:6)	-8.77133e-05	-0.000816551	0.000499052	0.7586	0.0123348	0.0063997	0.0183008	0	0.0122471	0.00636659	0.0181781	-0.00716196	-0.066673	0.0407486	0.7586
12	Cer(d18:0/24:0)	-8.74535e-05	-0.000779752	0.000502951	0.761	0.0123346	0.00637102	0.0184173	0	0.0122471	0.0063188	0.0183172	-0.00714075	-0.0636682	0.0410669	0.761
435	PE(P-18:0/18:3)	-5.13643e-05	-0.000553655	0.000295805	0.7634	0.0122985	0.00634855	0.0184758	0	0.0122471	0.00630773	0.0183687	-0.00419399	-0.045207	0.024153	0.7634
622	DG(18:2_18:2)	0.000167843	-0.000993852	0.00139323	0.7674	0.0120793	0.00624053	0.0179664	0	0.0122471	0.00638022	0.0182016	0.0137047	-0.0811499	0.11376	0.7674
687	TG(54:7) [NL-20:5]	-0.000312485	-0.00246486	0.00166573	0.7682	0.0125596	0.00699639	0.0182278	0	0.0122471	0.00635216	0.0183014	-0.025515	-0.20126	0.13601	0.7682
574	FA(17:1)	5.80803e-05	-0.000308802	0.000547825	0.7692	0.012189	0.00618241	0.0184045	0.0004	0.0122471	0.00625725	0.0184941	0.00474237	-0.0252143	0.044731	0.7694
385	PE(18:0_20:3) (a)	-4.26178e-05	-0.00050194	0.000237938	0.77	0.0122897	0.0063448	0.0182873	0	0.0122471	0.00629786	0.0182664	-0.00347982	-0.0409844	0.0194281	0.77
452	PE(P-18:1/20:4) (a)	6.33318e-05	-0.000381883	0.000565013	0.7706	0.0121838	0.00622326	0.0181841	0.0002	0.0122471	0.0062685	0.0182621	0.00517116	-0.0311815	0.0461344	0.7704
67	Cer(m18:0/24:0)	5.48248e-05	-0.000317389	0.000526725	0.772	0.0121923	0.00626217	0.0182757	0	0.0122471	0.00635366	0.0183263	0.00447655	-0.0259154	0.0430081	0.772
429	PE(P-17:0/20:4) (a)	8.07409e-05	-0.000539346	0.000730581	0.7742	0.0121664	0.00623667	0.0182313	0	0.0122471	0.0063141	0.0183174	0.00659265	-0.0440387	0.0596533	0.7742
633	TG(48:3) [NL-14:0]	-0.000198635	-0.0016893	0.00105548	0.7782	0.0124457	0.00680804	0.0182477	0	0.0122471	0.00626262	0.0182525	-0.0162189	-0.137934	0.0861821	0.7782
727	CE(22:6) [+OH]	0.000122297	-0.000748875	0.000912483	0.7786	0.0121248	0.00616285	0.018194	0	0.0122471	0.00637024	0.0181826	0.00998579	-0.0611471	0.074506	0.7786
175	PC(15-MHDA_22:6)	-0.000160522	-0.00138354	0.00101996	0.783	0.0124076	0.00657368	0.0182155	0	0.0122471	0.00625913	0.0181698	-0.0131069	-0.112968	0.0832815	0.783
666	TG(52:4) [NL-18:2]	0.000193025	-0.00140227	0.00166794	0.7836	0.0120541	0.00632918	0.0178574	0	0.0122471	0.00624256	0.0182495	0.0157609	-0.114498	0.136191	0.7836
283	PC(P-36:3)	4.70664e-05	-0.000275104	0.000499537	0.7842	0.0122	0.00629829	0.0181296	0	0.0122471	0.00633428	0.0181628	0.00384306	-0.0224628	0.0407882	0.7842
78	HexCer(d16:1/22:0)	-6.08168e-05	-0.000617771	0.00042495	0.7854	0.0123079	0.00639249	0.0183788	0	0.0122471	0.00636919	0.0182397	-0.0049658	-0.0504422	0.034698	0.7854
345	LPC(26:0) [sn1]	5.02257e-05	-0.000269557	0.000483168	0.7878	0.0121969	0.0062436	0.0183754	0.0004	0.0122471	0.00632985	0.0184039	0.00410103	-0.0220098	0.0394516	0.7878
145	SM(d18:1/16:0)	5.04954e-05	-0.000344742	0.000532611	0.789	0.0121966	0.0065137	0.0182406	0	0.0122471	0.00655935	0.0183334	0.00412305	-0.0281489	0.0434887	0.789
508	PI(34:1)	6.82366e-05	-0.000459338	0.000575863	0.7902	0.0121789	0.0062696	0.0182508	0.0004	0.0122471	0.0062931	0.018258	0.00557165	-0.0375058	0.0470203	0.7904
581	FA(20:4)	4.90987e-05	-0.000285034	0.00049224	0.791	0.012198	0.0064221	0.018271	0	0.0122471	0.00645747	0.0183618	0.004009	-0.0232736	0.0401923	0.791
615	DG(18:1_18:2)	-0.000155446	-0.00139681	0.000995409	0.7926	0.0124026	0.00658262	0.0182449	0	0.0122471	0.00634666	0.018162	-0.0126925	-0.114052	0.0812771	0.7926
506	PI(20:0_20:4)	4.70592e-05	-0.000314356	0.000483765	0.7928	0.0122001	0.00635504	0.0182853	0.0002	0.0122471	0.00635436	0.0183742	0.00384247	-0.0256678	0.0395003	0.793
272	PC(P-17:0/20:4) (a)	-8.34169e-05	-0.00085252	0.000602161	0.7938	0.0123305	0.0064172	0.0182171	0.0002	0.0122471	0.00624531	0.0182635	-0.00681115	-0.0696099	0.0491676	0.7936
81	HexCer(d18:1/18:0)	-5.4726e-05	-0.00055804	0.000355298	0.7946	0.0123018	0.00639805	0.0182665	0	0.0122471	0.00626333	0.018226	-0.00446849	-0.0455651	0.0290108	0.7946
115	Sulfatide (d18:1:/24:0(OH))	-4.26973e-05	-0.000496984	0.000291136	0.7974	0.0122898	0.00643368	0.0182762	0	0.0122471	0.00639333	0.0181857	-0.00348632	-0.0405797	0.0237718	0.7974
371	PE(16:0_18:3) (a)	-3.30905e-05	-0.000489869	0.000243427	0.798	0.0122802	0.00630778	0.0184943	0.0002	0.0122471	0.00628502	0.0183794	-0.00270191	-0.0399987	0.0198763	0.798
61	Cer(d20:1/24:0)	3.90554e-05	-0.000252494	0.000425742	0.7982	0.0122081	0.00623225	0.0182676	0	0.0122471	0.00625683	0.0183244	0.00318895	-0.0206166	0.0347626	0.7982
193	PC(17:0_18:1)	6.1662e-05	-0.000427914	0.000596032	0.8026	0.0121854	0.00606463	0.0181466	0	0.0122471	0.00615633	0.0182218	0.00503482	-0.03494	0.0486672	0.8026
642	TG(50:2) [NL-14:0]	-3.15783e-05	-0.000452442	0.000258497	0.8032	0.0122787	0.00640868	0.0183181	0	0.0122471	0.00635356	0.0182882	-0.00257843	-0.0369428	0.0211068	0.8032
141	SM(d18:0/14:0)	-0.000109265	-0.00109885	0.000710745	0.8038	0.0123564	0.00635218	0.0184148	0	0.0122471	0.00623556	0.0182886	-0.0089217	-0.0897228	0.0580337	0.8038
235	PC(40:7) (a)	-0.000188193	-0.00172364	0.00123643	0.8042	0.0124353	0.00658625	0.0183615	0	0.0122471	0.00628955	0.0182148	-0.0153663	-0.140738	0.100957	0.8042
639	TG(50:1) [NL-14:0]	-5.66467e-05	-0.000599955	0.000448378	0.8066	0.0123038	0.00632	0.0182909	0.0002	0.0122471	0.00631488	0.0182173	-0.00462531	-0.0489874	0.0366109	0.8066
73	Cer(m18:1/24:0)	7.27249e-05	-0.000536345	0.000840202	0.8068	0.0121744	0.0061877	0.0180574	0	0.0122471	0.00628121	0.018128	0.00593813	-0.0437936	0.0686041	0.8068
167	PA(36:4)	3.54058e-05	-0.000245474	0.000413868	0.807	0.0122117	0.00631385	0.0182709	0	0.0122471	0.00634832	0.0182958	0.00289095	-0.0200434	0.0337932	0.807
55	Cer(d19:1/23:0)	-3.7576e-05	-0.000462916	0.000274496	0.8082	0.0122847	0.00613305	0.0181665	0	0.0122471	0.00606784	0.0181285	-0.00306815	-0.037798	0.0224131	0.8082
263	PC(P-16:0/16:0)	-6.07031e-05	-0.000547385	0.000419338	0.8112	0.0123078	0.00624138	0.0183776	0	0.0122471	0.00619638	0.018286	-0.00495652	-0.044695	0.0342397	0.8112
34	Cer(d18:1/21:0)	4.03531e-05	-0.000253875	0.000400698	0.8124	0.0122068	0.00629634	0.0182868	0	0.0122471	0.00630827	0.0183279	0.00329491	-0.0207294	0.0327178	0.8122
525	PS(38:3)	-3.89359e-05	-0.000427942	0.000254685	0.8146	0.012286	0.0063445	0.0180938	0.0004	0.0122471	0.00634643	0.0180547	-0.00317919	-0.0349423	0.0207955	0.815
520	LPI(18:2) [sn2]	4.63121e-05	-0.000273431	0.000452103	0.8166	0.0122008	0.00620738	0.0182749	0.0004	0.0122471	0.00625377	0.0182766	0.00378148	-0.0223262	0.0369151	0.817
275	PC(P-18:0/20:4)	-5.18716e-05	-0.000507846	0.000333867	0.8184	0.012299	0.0063442	0.0183196	0	0.0122471	0.00626699	0.0182751	-0.00423541	-0.0414666	0.0272609	0.8184
215	PC(31:0) (a)	5.20928e-05	-0.000438235	0.000669553	0.8194	0.012195	0.00608253	0.0183313	0	0.0122471	0.00623556	0.0183863	0.00425347	-0.0357827	0.0546703	0.8194
10	Cer(d18:0/20:0)	-5.16136e-05	-0.000666546	0.000430824	0.82	0.0122987	0.00649283	0.0183555	0	0.0122471	0.0063632	0.0182596	-0.00421435	-0.0544248	0.0351776	0.82
659	TG(52:1) [NL-18:0]	-0.000107068	-0.00108988	0.000833063	0.8214	0.0123542	0.00623876	0.018515	0	0.0122471	0.00625571	0.0183972	-0.00874227	-0.0889906	0.0680212	0.8216
531	PG(36:1)	-2.70222e-05	-0.000449229	0.000242987	0.824	0.0122741	0.00636975	0.0183631	0	0.0122471	0.00627	0.0183242	-0.00220641	-0.0366804	0.0198403	0.824
419	PE(P-16:0/18:2)	-7.8448e-05	-0.000852296	0.000619333	0.8258	0.0123256	0.00647814	0.0184353	0	0.0122471	0.0063982	0.0182899	-0.00640543	-0.0695916	0.0505697	0.8258
103	Hex3Cer(d18:1/22:0)	4.28169e-05	-0.000358582	0.000541187	0.8276	0.0122043	0.0062947	0.018107	0	0.0122471	0.00632473	0.0181913	0.00349608	-0.0292789	0.044189	0.8276
717	TG(O-52:2) [NL-18:1]	-6.21435e-05	-0.000671671	0.000558847	0.8286	0.0123093	0.00636719	0.0181788	0	0.0122471	0.00625885	0.0181707	-0.00507414	-0.0548432	0.045631	0.8286
465	PE(P-20:0/20:4)	-4.76418e-05	-0.000558259	0.000366677	0.829	0.0122948	0.00638252	0.0182612	0.0002	0.0122471	0.00632967	0.0181663	-0.00389005	-0.0455829	0.0299399	0.8288
477	LPE(18:2) [sn1]	-0.000195359	-0.00198471	0.00150331	0.8292	0.0124425	0.00671607	0.0182985	0.0002	0.0122471	0.00625493	0.0182702	-0.0159514	-0.162055	0.122748	0.8294
86	HexCer(d18:2/18:0)	5.26738e-05	-0.00050294	0.000642946	0.832	0.0121944	0.00637072	0.0182025	0.0002	0.0122471	0.00635845	0.0182778	0.00430092	-0.041066	0.0524978	0.8318
160	SM(d18:2/23:0)	3.77889e-05	-0.000256336	0.000447307	0.832	0.0122093	0.00634615	0.0181444	0	0.0122471	0.00637177	0.0181913	0.00308553	-0.0209303	0.0365234	0.832
437	PE(P-18:0/20:3) (b)	2.93089e-05	-0.000282032	0.000446487	0.8326	0.0122178	0.00629178	0.0182611	0.0002	0.0122471	0.00636286	0.0182847	0.00239313	-0.0230284	0.0364565	0.8328
623	DG(18:2_20:4)	-0.000168097	-0.00198466	0.00143653	0.8328	0.0124152	0.00672986	0.0183742	0	0.0122471	0.00632597	0.0182832	-0.0137254	-0.162051	0.117295	0.8328
29	Cer(d18:1/16:0)	5.98611e-05	-0.000301432	0.00041053	0.8344	0.0121872	0.006309	0.0182724	0.0002	0.0122471	0.00635185	0.0183588	0.00488778	-0.0246125	0.0335206	0.8342
178	PC(15:0_22:6)	6.82003e-05	-0.000660104	0.000803851	0.8346	0.0121789	0.00637481	0.0181237	0.0002	0.0122471	0.00639947	0.0181175	0.00556869	-0.0538987	0.065636	0.8344
397	PE(36:0)	-5.13288e-05	-0.000611392	0.000430045	0.8346	0.0122984	0.0062674	0.0182587	0.0002	0.0122471	0.00620577	0.0181505	-0.0041911	-0.0499213	0.035114	0.8344
83	HexCer(d18:1/22:0)	6.51297e-05	-0.000598373	0.000737739	0.8348	0.012182	0.00636982	0.0182599	0	0.0122471	0.00634148	0.0182841	0.00531796	-0.0488583	0.0602378	0.8348
496	PI(18:0_18:1)	-1.32375e-05	-0.000422843	0.00021045	0.8354	0.0122603	0.00631049	0.018277	0	0.0122471	0.0062889	0.0182347	-0.00108087	-0.034526	0.0171836	0.8354
219	PC(33:0) (a)	8.08875e-05	-0.000822617	0.00102032	0.8358	0.0121662	0.00615709	0.0182808	0.0002	0.0122471	0.00630753	0.0182837	0.00660462	-0.0671682	0.0833109	0.8356
701	TG(58:10) [NL-22:6]	0.000227773	-0.00191178	0.00219305	0.8406	0.0120193	0.00649629	0.0178934	0	0.0122471	0.00632473	0.0183043	0.0185981	-0.156101	0.179067	0.8406
578	FA(18:3)	-3.24768e-05	-0.000452671	0.000271635	0.842	0.0122796	0.00624171	0.0183044	0	0.0122471	0.00616121	0.01828	-0.00265179	-0.0369614	0.0221795	0.842
535	CE(16:0)	-5.23941e-05	-0.000531862	0.000436073	0.8422	0.0122995	0.00653621	0.0182785	0	0.0122471	0.00647718	0.018255	-0.00427808	-0.0434276	0.0356062	0.8422
711	TG(O-50:3) [NL-18:2]	-3.95211e-06	-0.000371294	0.00022266	0.8444	0.0122511	0.00649115	0.0182812	0	0.0122471	0.00648787	0.0181945	-0.000322697	-0.0303169	0.0181806	0.8444
253	PC(O-35:4)	3.42006e-05	-0.000260776	0.000420555	0.846	0.0122129	0.00636573	0.0182952	0	0.0122471	0.0063567	0.0183343	0.00279255	-0.0212929	0.0343391	0.846
102	Hex3Cer(d18:1/20:0)	3.05425e-05	-0.000292407	0.000471007	0.8464	0.0122166	0.00630244	0.018074	0	0.0122471	0.00636215	0.0181225	0.00249386	-0.0238756	0.0384586	0.8464
79	HexCer(d16:1/24:0)	-2.78094e-05	-0.000444856	0.000279244	0.8482	0.0122749	0.00636973	0.0182674	0	0.0122471	0.00637144	0.0182621	-0.00227069	-0.0363233	0.0228008	0.8484
164	PA(36:1)	4.33388e-05	-0.000309964	0.000433286	0.8486	0.0122038	0.00626312	0.0182613	0	0.0122471	0.00630694	0.018313	0.0035387	-0.0253091	0.0353786	0.8486
571	FA(16:1)	-7.79534e-05	-0.000993158	0.000731868	0.85	0.0123251	0.00621862	0.0184395	0	0.0122471	0.00622699	0.0182758	-0.00636505	-0.0810932	0.0597585	0.85
352	LPC(O-22:0)	4.67538e-05	-0.000569272	0.000745921	0.8524	0.0122004	0.00633422	0.0180345	0.0002	0.0122471	0.00635294	0.0181739	0.00381753	-0.0464822	0.0609059	0.8522
516	LPI(18:0) [sn2]	-2.90539e-05	-0.000494346	0.000313341	0.853	0.0122762	0.00626113	0.0182842	0.0002	0.0122471	0.00624296	0.0182412	-0.00237231	-0.0403643	0.0255849	0.8528
208	PC(18:1_20:3)	0.000102776	-0.00108758	0.00126718	0.8534	0.0121443	0.00626264	0.0181439	0	0.0122471	0.00635066	0.018261	0.00839183	-0.0888032	0.103467	0.8532
554	CE(22:5) (n6)	9.38346e-05	-0.00115322	0.00136996	0.8536	0.0121533	0.00632881	0.0182066	0.0002	0.0122471	0.00640123	0.0183146	0.00766177	-0.0941628	0.11186	0.8538
107	GM3(d18:1/18:0)	2.8908e-05	-0.00030443	0.000421435	0.855	0.0122182	0.00622286	0.0180276	0.0002	0.0122471	0.00629158	0.0180432	0.00236039	-0.0248573	0.034411	0.8548
569	FA(15:0)	4.84626e-05	-0.000548673	0.00069043	0.8556	0.0121986	0.00611337	0.0182911	0.0004	0.0122471	0.00628805	0.0182543	0.00395707	-0.0448002	0.056375	0.8558
132	SM(44:1)	2.69324e-05	-0.000273145	0.000407864	0.8564	0.0122202	0.00631162	0.0182242	0.0002	0.0122471	0.00633764	0.0182779	0.00219909	-0.0223028	0.0333029	0.8566
670	TG(52:5) [NL-20:5]	-0.000163094	-0.00203951	0.00161178	0.8574	0.0124102	0.00677057	0.018219	0	0.0122471	0.00625025	0.018182	-0.013317	-0.16653	0.131605	0.8574
350	LPC(O-20:0)	9.98168e-05	-0.00102683	0.00120071	0.8578	0.0121473	0.00643984	0.0178305	0.0002	0.0122471	0.0063538	0.0181743	0.00815024	-0.0838422	0.0980403	0.8576
239	PC(O-16:0/20:3)	-7.00446e-05	-0.000862755	0.000691684	0.8574	0.0123172	0.00647863	0.0183253	0.0002	0.0122471	0.00632007	0.0182825	-0.00571928	-0.0704456	0.0564773	0.8576
33	Cer(d18:1/20:0)	4.24627e-05	-0.000304393	0.000387697	0.861	0.0122046	0.00651833	0.0182118	0	0.0122471	0.00653086	0.0182998	0.00346716	-0.0248543	0.0316562	0.861
279	PC(P-18:1/22:6)	3.05391e-05	-0.00026726	0.000401465	0.861	0.0122166	0.00627917	0.0181052	0	0.0122471	0.0062971	0.0181284	0.00249357	-0.0218223	0.0327804	0.861
346	LPC(26:0) [sn2]	3.85686e-05	-0.000318075	0.000447661	0.8612	0.0122085	0.00618455	0.0182143	0	0.0122471	0.00624463	0.0182104	0.0031492	-0.0259714	0.0365524	0.8612
457	PE(P-18:1/22:5) (a)	3.99085e-05	-0.000316423	0.000410164	0.8622	0.0122072	0.00622642	0.0182062	0.0004	0.0122471	0.00626281	0.0182366	0.00325861	-0.0258365	0.0334907	0.8618
325	LPC(20:3) [sn1]	0.00017216	-0.00171891	0.00205152	0.862	0.012075	0.0064527	0.0179259	0	0.0122471	0.00636172	0.0181058	0.0140572	-0.140353	0.16751	0.862
16	Cer(d16:1/20:0)	-1.48619e-05	-0.000393399	0.000234484	0.863	0.012262	0.00627512	0.0182798	0	0.0122471	0.00626569	0.0182571	-0.0012135	-0.0321218	0.019146	0.863
146	SM(d18:1/17:0)/SM(d17:1/18:0)	-4.05919e-05	-0.000623963	0.000455439	0.8634	0.0122877	0.00636692	0.0184358	0	0.0122471	0.00630703	0.0182922	-0.0033144	-0.0509478	0.0371875	0.8634
142	SM(d18:0/16:0)	-7.10554e-05	-0.000912132	0.000678285	0.8632	0.0123182	0.00643194	0.0183571	0.0002	0.0122471	0.00628537	0.018263	-0.00580181	-0.0744773	0.0553833	0.8634
436	PE(P-18:0/20:3) (a)	-2.96626e-05	-0.000471826	0.000319103	0.8636	0.0122768	0.00635158	0.0183863	0	0.0122471	0.00637405	0.0183014	-0.00242201	-0.0385255	0.0260554	0.8636
380	PE(17:0_18:2)	6.08489e-05	-0.00071914	0.000771968	0.864	0.0121863	0.00633532	0.0181844	0	0.0122471	0.00635668	0.0181929	0.00496843	-0.0587192	0.0630327	0.864
59	Cer(d20:1/22:0)	4.86129e-05	-0.000528905	0.000644053	0.864	0.0121985	0.00641976	0.0182651	0	0.0122471	0.00639715	0.0183368	0.00396934	-0.0431861	0.0525881	0.864
608	DG(16:0_22:6)	0.000166262	-0.00181236	0.00207679	0.8688	0.0120808	0.00640037	0.0179493	0	0.0122471	0.00640834	0.0181968	0.0135756	-0.147983	0.169574	0.8688
528	PS(40:5)	-3.3033e-05	-0.000438915	0.000256261	0.8688	0.0122801	0.00644503	0.0184459	0	0.0122471	0.00644518	0.0183781	-0.00269721	-0.0358382	0.0209242	0.8688
601	DG(14:0_18:2)	7.46356e-05	-0.000998702	0.00104192	0.8688	0.0121725	0.0063772	0.0181367	0.0002	0.0122471	0.00640868	0.0181973	0.00609414	-0.0815459	0.0850747	0.869
420	PE(P-16:0/18:3)	-2.59625e-05	-0.00034574	0.000236759	0.8716	0.0122731	0.00632462	0.0182935	0	0.0122471	0.00626144	0.0182585	-0.00211989	-0.0282304	0.0193318	0.8716
367	PE(16:0_16:0)	-1.4502e-05	-0.000377743	0.000245999	0.8722	0.0122616	0.00637924	0.0182342	0	0.0122471	0.00634071	0.0182298	-0.00118412	-0.0308434	0.0200863	0.8722
627	TG(48:1) [NL-16:1]	6.66181e-05	-0.000815555	0.000984009	0.8724	0.0121805	0.00613594	0.018243	0	0.0122471	0.00623723	0.0182675	0.00543949	-0.0665917	0.0803462	0.8724
84	HexCer(d18:1/24:0)	-4.23597e-05	-0.000701665	0.000589083	0.8726	0.0122895	0.00645839	0.0183571	0.0004	0.0122471	0.00644315	0.0183929	-0.00345875	-0.0572923	0.0480997	0.8726
72	Cer(m18:1/23:0)	-7.69415e-05	-0.00100605	0.000848809	0.8738	0.0123241	0.00632425	0.0182878	0	0.0122471	0.00615109	0.0182506	-0.00628242	-0.0821457	0.0693069	0.8738
438	PE(P-18:0/20:4)	-2.52824e-05	-0.000445464	0.000318029	0.8772	0.0122724	0.00625672	0.0183517	0.0002	0.0122471	0.00630548	0.0182933	-0.00206436	-0.036373	0.0259677	0.8774
92	Hex2Cer(d18:1/16:0)	-1.81665e-05	-0.000395627	0.000244649	0.8812	0.0122653	0.00632827	0.018371	0	0.0122471	0.00631895	0.0182833	-0.00148333	-0.0323037	0.019976	0.8812
534	CE(15:0)	-2.31487e-05	-0.000422415	0.000308078	0.8818	0.0122703	0.0063552	0.0183309	0	0.0122471	0.00632331	0.0183053	-0.00189013	-0.034491	0.0251551	0.8818
18	Cer(d16:1/23:0)	2.24056e-05	-0.000248568	0.000380497	0.8848	0.0122247	0.00626783	0.0182111	0	0.0122471	0.00630824	0.0182349	0.00182946	-0.0202961	0.0310683	0.8848
332	LPC(22:0) [sn2]	3.18108e-05	-0.000328024	0.000455134	0.8852	0.0122153	0.00638985	0.0182839	0	0.0122471	0.00637155	0.0183062	0.00259741	-0.0267838	0.0371626	0.8852
75	Cer1P(d18:1/16:0)	3.12472e-05	-0.000291036	0.00038637	0.8854	0.0122159	0.00637902	0.0183677	0	0.0122471	0.00639315	0.0183813	0.00255139	-0.0237637	0.0315478	0.8854
376	PE(16:0_22:6)	5.55066e-05	-0.000792368	0.000886417	0.8866	0.0121916	0.00622052	0.0183396	0	0.0122471	0.00633395	0.0183521	0.00453222	-0.0646984	0.0723777	0.8866
2	Sph(d18:1)	-1.91047e-05	-0.000439935	0.000307431	0.8892	0.0122662	0.00632077	0.0181409	0	0.0122471	0.0062864	0.018091	-0.00155993	-0.0359215	0.0251023	0.8892
144	SM(d18:1/14:0/SM(d16:1/16:0)	2.48451e-05	-0.000361771	0.000446635	0.8896	0.0122223	0.00609987	0.0183289	0.0006	0.0122471	0.00613207	0.0183577	0.00202865	-0.0295393	0.0364686	0.8898
518	LPI(18:1) [sn2]	-4.92131e-05	-0.000841293	0.000698467	0.8898	0.0122963	0.00650277	0.018269	0.0002	0.0122471	0.00636289	0.0182326	-0.00401834	-0.0686932	0.0570312	0.89
43	Cer(d18:2/18:0)	3.73992e-05	-0.000482919	0.000487981	0.8906	0.0122097	0.00627195	0.0181783	0.0002	0.0122471	0.00624882	0.0182592	0.00305372	-0.0394313	0.0398446	0.8904
514	PIP1(38:4)	-1.86514e-05	-0.00044193	0.00033134	0.89	0.0122658	0.00658558	0.0182101	0.0002	0.0122471	0.00657193	0.0182173	-0.00152292	-0.0360844	0.0270545	0.8904
254	PC(O-36:0)	-2.48786e-05	-0.000467085	0.000363229	0.8916	0.012272	0.00633896	0.018118	0	0.0122471	0.00621582	0.018163	-0.00203139	-0.0381384	0.0296583	0.8916
226	PC(38:2)	-7.97246e-05	-0.00153436	0.00120713	0.8958	0.0123268	0.00650962	0.0183623	0	0.0122471	0.00634761	0.0181615	-0.00650967	-0.125283	0.0985642	0.8958
383	PE(18:0_18:1)	3.63436e-05	-0.000351349	0.000431816	0.8968	0.0122108	0.00637209	0.0182411	0	0.0122471	0.00638641	0.018242	0.00296752	-0.0286883	0.0352586	0.8968
342	LPC(22:6) [sn2]	5.34018e-05	-0.000957915	0.00104168	0.897	0.0121937	0.00654474	0.01816	0	0.0122471	0.0065126	0.0182907	0.00436036	-0.0782156	0.0850551	0.897
24	Cer(d17:1/22:0)	1.42549e-05	-0.000251582	0.000331635	0.8984	0.0122329	0.00627491	0.0182578	0	0.0122471	0.00631578	0.0182547	0.00116394	-0.0205422	0.0270786	0.8984
50	Cer(d18:2/26:0)	-2.89954e-05	-0.000413339	0.000353045	0.8984	0.0122761	0.00632541	0.0183744	0	0.0122471	0.00624291	0.0183331	-0.00236753	-0.0337499	0.0288268	0.8984
118	Sulfatide (d18:1:/24:1)	-3.6709e-05	-0.000430932	0.000368655	0.8994	0.0122838	0.00632141	0.0182689	0.0002	0.0122471	0.00631103	0.0182328	-0.00299736	-0.0351864	0.0301014	0.8996
4	S1P(d16:1)	-1.41598e-05	-0.000385395	0.000279315	0.901	0.0122613	0.00648589	0.0184321	0	0.0122471	0.00644165	0.01838	-0.00115617	-0.0314683	0.0228066	0.9012
26	Cer(d17:1/24:0)	5.26573e-06	-0.000269457	0.000369684	0.9044	0.0122418	0.00616269	0.0181884	0	0.0122471	0.00619396	0.0181829	0.000429957	-0.0220017	0.0301854	0.9044
676	TG(54:2) [NL-20:1]	4.94808e-05	-0.000851643	0.000878778	0.9052	0.0121976	0.00628024	0.0181985	0	0.0122471	0.00633495	0.0182656	0.0040402	-0.0695383	0.0717539	0.9052
31	Cer(d18:1/18:0)	7.65963e-06	-0.000368993	0.000259778	0.906	0.0122395	0.00629195	0.018309	0.0002	0.0122471	0.00627615	0.0182712	0.000625424	-0.030129	0.0212114	0.9062
65	Cer(m18:0/22:0)	2.15261e-05	-0.00027042	0.000348825	0.9062	0.0122256	0.00646394	0.0183827	0.0002	0.0122471	0.0064765	0.0183827	0.00175765	-0.0220803	0.0284822	0.9064
205	PC(18:0_22:6)	-3.11203e-05	-0.000746232	0.00060841	0.9066	0.0122782	0.00629925	0.0183032	0	0.0122471	0.00625236	0.0182893	-0.00254103	-0.0609313	0.0496778	0.9066
451	PE(P-18:1/20:3) (b)	-8.62578e-06	-0.000360341	0.000250949	0.9084	0.0122557	0.00622487	0.0182175	0.0002	0.0122471	0.00623365	0.018197	-0.000704311	-0.0294226	0.0204904	0.9086
21	Cer(d17:1/16:0)	2.4585e-05	-0.00031324	0.000386194	0.9108	0.0122225	0.00621138	0.0180763	0.0004	0.0122471	0.00624232	0.0181204	0.00200741	-0.0255767	0.0315335	0.911
370	PE(16:0_18:2)	-1.24532e-05	-0.000502796	0.000371786	0.9114	0.0122596	0.00636973	0.0181884	0	0.0122471	0.0064081	0.0181673	-0.00101683	-0.0410543	0.030357	0.9114
600	DG(14:0_16:0)	-2.75105e-05	-0.000554818	0.000467706	0.9124	0.0122746	0.00634403	0.0183428	0	0.0122471	0.00631641	0.0182798	-0.00224628	-0.0453019	0.0381891	0.9124
265	PC(P-16:0/18:0)	7.54813e-06	-0.000263544	0.000357989	0.9126	0.0122396	0.00631786	0.018216	0.0002	0.0122471	0.00630868	0.0182379	0.000616319	-0.0215188	0.0292305	0.9126
238	PC(O-16:0/16:0)	3.7763e-05	-0.000687244	0.000797517	0.9124	0.0122093	0.00633417	0.0180664	0.0004	0.0122471	0.00632953	0.0182043	0.00308342	-0.0561148	0.0651188	0.9128
179	PC(16:0_16:0)	1.51699e-05	-0.000322269	0.000428796	0.9132	0.0122319	0.00619875	0.0183356	0	0.0122471	0.00621397	0.0183589	0.00123865	-0.0263139	0.035012	0.9132
573	FA(17:0)	2.45141e-05	-0.000314562	0.000396225	0.9142	0.0122226	0.00633235	0.0182316	0.0002	0.0122471	0.00636092	0.0181778	0.00200163	-0.0256846	0.0323525	0.9144
90	Hex2Cer(d16:1/16:0)	-1.73227e-05	-0.000414393	0.000329089	0.9152	0.0122644	0.00648553	0.0182242	0	0.0122471	0.00644622	0.0182341	-0.00141443	-0.033836	0.0268707	0.9152
126	SM(40:3) (b)	-2.01874e-05	-0.000345977	0.000257628	0.916	0.0122673	0.00632942	0.0180895	0.0002	0.0122471	0.00630604	0.0180527	-0.00164834	-0.0282497	0.0210358	0.9158
121	SM(37:1)	-1.80284e-05	-0.000355405	0.000285583	0.9194	0.0122651	0.00635415	0.0183105	0	0.0122471	0.00633781	0.018291	-0.00147206	-0.0290195	0.0233184	0.9194
209	PC(18:1_22:6) (a)	1.94243e-05	-0.000487336	0.000551226	0.9234	0.0122277	0.00624793	0.0182357	0	0.0122471	0.00632032	0.0182292	0.00158603	-0.0397919	0.0450087	0.9234
723	TG(O-54:4) [NL-18:2]	-1.8031e-05	-0.000353145	0.000345237	0.9242	0.0122651	0.00623539	0.0183065	0.0002	0.0122471	0.00618554	0.0182823	-0.00147227	-0.0288349	0.0281893	0.9244
526	PS(38:4)	-1.90976e-05	-0.000364555	0.000284051	0.9248	0.0122662	0.00641652	0.0182546	0.0002	0.0122471	0.00644443	0.0182293	-0.00155936	-0.0297666	0.0231933	0.925
696	TG(56:7) [NL-22:6]	-0.000104754	-0.00213108	0.0018524	0.9258	0.0123519	0.00686379	0.018057	0	0.0122471	0.00638254	0.0182636	-0.00855338	-0.174007	0.151252	0.9258
22	Cer(d17:1/18:0)	1.56227e-06	-0.000323077	0.000226657	0.9272	0.0122455	0.0064079	0.0183095	0	0.0122471	0.00642275	0.0183157	0.000127563	-0.0263799	0.018507	0.9272
276	PC(P-18:0/22:5)	1.13638e-05	-0.000281396	0.000368577	0.9288	0.0122357	0.00625989	0.0182885	0	0.0122471	0.00625235	0.0183456	0.000927872	-0.0229766	0.030095	0.9288
23	Cer(d17:1/20:0)	-9.70784e-06	-0.000331423	0.000248279	0.9288	0.0122568	0.00645277	0.0182405	0	0.0122471	0.00644461	0.018215	-0.000792663	-0.0270613	0.0202725	0.9288
168	PA(40:6)	2.14465e-05	-0.000535672	0.000537604	0.9296	0.0122257	0.00623918	0.0182679	0	0.0122471	0.00631378	0.018261	0.00175115	-0.0437386	0.0438964	0.9296
71	Cer(m18:1/22:0)	1.78204e-05	-0.000541137	0.000612187	0.9298	0.0122293	0.00620368	0.0182798	0.0002	0.0122471	0.00628115	0.0183253	0.00145507	-0.0441849	0.0499863	0.93
25	Cer(d17:1/23:0)	1.38745e-06	-0.000242426	0.000324561	0.9304	0.0122457	0.00629807	0.0182115	0.0002	0.0122471	0.00634874	0.0182183	0.000113288	-0.0197946	0.026501	0.9306
176	PC(15:0_20:3)	-8.23346e-06	-0.000317829	0.000251282	0.9308	0.0122553	0.00639181	0.0183442	0	0.0122471	0.00636084	0.0183318	-0.000672278	-0.0259514	0.0205176	0.9308
11	Cer(d18:0/22:0)	4.22784e-05	-0.0011462	0.00119848	0.9336	0.0122048	0.00624722	0.0183294	0.0002	0.0122471	0.0062595	0.018308	0.00345211	-0.0935898	0.0978582	0.9334
354	LPC(O-24:0)	-2.18563e-05	-0.000380282	0.000316601	0.9336	0.012269	0.0063336	0.0183271	0.0002	0.0122471	0.00631874	0.0183231	-0.00178461	-0.0310507	0.0258511	0.9334
683	TG(54:6) [NL-18:3]	-6.19169e-05	-0.00158924	0.00132531	0.934	0.012309	0.00647178	0.0183156	0	0.0122471	0.00627433	0.0183576	-0.00505563	-0.129765	0.108214	0.934
344	LPC(24:0) [sn2]	1.51173e-05	-0.000346752	0.00037246	0.9344	0.012232	0.00638268	0.0182675	0	0.0122471	0.00642332	0.018256	0.00123436	-0.028313	0.0304121	0.9344
269	PC(P-16:0/20:4)	7.77207e-06	-0.000281102	0.000349241	0.9344	0.0122393	0.0063084	0.018295	0	0.0122471	0.00630364	0.0183041	0.000634604	-0.0229525	0.0285162	0.9344
710	TG(O-50:2) [NL-18:2]	-1.76907e-05	-0.000318306	0.000268124	0.9382	0.0122648	0.00638275	0.018314	0	0.0122471	0.00640828	0.0182927	-0.00144448	-0.0259903	0.0218929	0.9382
587	AC(13:0)	-3.13224e-05	-0.000722709	0.000704987	0.9394	0.0122784	0.00638135	0.0183284	0.0002	0.0122471	0.00634105	0.0183521	-0.00255753	-0.0590106	0.0575635	0.9394
373	PE(16:0_20:3)	-8.38641e-06	-0.000365905	0.000270031	0.94	0.0122555	0.00631563	0.0182498	0	0.0122471	0.00630198	0.0181785	-0.000684766	-0.0298768	0.0220485	0.94
27	Cer(d17:1/24:1)	-8.06246e-06	-0.000290806	0.000258043	0.9408	0.0122552	0.00643287	0.0182835	0	0.0122471	0.00642465	0.0182565	-0.000658315	-0.0237449	0.0210697	0.9408
402	PE(O-16:0/20:4)	-8.03894e-06	-0.000496227	0.000392917	0.941	0.0122551	0.00648833	0.0183321	0	0.0122471	0.00644667	0.0182982	-0.000656395	-0.0405179	0.0320824	0.9412
17	Cer(d16:1/22:0)	-5.77492e-07	-0.000270883	0.000228478	0.9424	0.0122477	0.00651547	0.0182866	0.0002	0.0122471	0.0065079	0.0182843	-4.71534e-05	-0.0221181	0.0186557	0.9422
577	FA(18:2)	-6.38772e-06	-0.000353921	0.000269117	0.9422	0.0122535	0.00635062	0.0183086	0	0.0122471	0.0063259	0.0182763	-0.00052157	-0.0288983	0.0219739	0.9422
718	TG(O-54:2) [NL-17:1]	-3.45528e-06	-0.00038505	0.000276066	0.9424	0.0122506	0.00639487	0.0180783	0	0.0122471	0.00636384	0.0180601	-0.000282131	-0.03144	0.0225413	0.9424
62	Cer(d20:1/24:1)	-1.63316e-05	-0.00071803	0.000616178	0.9426	0.0122634	0.00647532	0.0181252	0.0002	0.0122471	0.00641614	0.018123	-0.00133351	-0.0586285	0.0503121	0.9428
364	PE(15-MHDA_18:2)	6.81677e-06	-0.000384209	0.00029404	0.9448	0.0122403	0.00646336	0.0183736	0	0.0122471	0.00642036	0.0183863	0.000556602	-0.0313714	0.0240089	0.9448
425	PE(P-16:0/22:4)	-1.30388e-05	-0.000340425	0.000303833	0.9458	0.0122601	0.00625363	0.0183347	0.0002	0.0122471	0.00625205	0.0183164	-0.00106464	-0.0277964	0.0248086	0.9458
3	Sph(d18:2)	1.03846e-05	-0.000458214	0.000498475	0.9466	0.0122367	0.00622925	0.0181729	0.0002	0.0122471	0.00620475	0.0182268	0.000847926	-0.037414	0.0407014	0.9464
234	PC(40:10)	-1.10901e-05	-0.000379238	0.000328956	0.9466	0.0122582	0.00644	0.0181101	0.0002	0.0122471	0.00643174	0.0181014	-0.000905526	-0.0309655	0.0268599	0.9464
32	Cer(d18:1/19:0)	-1.10729e-05	-0.000308796	0.000260186	0.9476	0.0122582	0.00628722	0.0183276	0	0.0122471	0.00626562	0.0183032	-0.000904125	-0.0252138	0.0212447	0.9476
297	LPC(17:0) [sn1]	-1.23621e-05	-0.00046102	0.000359198	0.9476	0.0122595	0.00636823	0.0183537	0	0.0122471	0.00640736	0.0183104	-0.00100939	-0.0376432	0.0293292	0.9476
491	PI(16:0_20:3) (b)	6.435e-05	-0.00196672	0.00189138	0.9484	0.0121828	0.00635514	0.0182694	0	0.0122471	0.00638294	0.0180957	0.0052543	-0.160586	0.154435	0.9484
274	PC(P-18:0/18:2)	1.0629e-05	-0.000368302	0.000387507	0.9482	0.0122365	0.00639538	0.0182091	0.0004	0.0122471	0.00643509	0.0182116	0.000867878	-0.0300726	0.0316407	0.9484
704	TG(O-50:1) [NL-15:0]	-6.58448e-06	-0.00030637	0.000254353	0.9486	0.0122537	0.0063144	0.0181924	0	0.0122471	0.00631453	0.0181943	-0.000537635	-0.0250157	0.0207684	0.9486
409	PE(O-18:1/22:6)	1.80307e-05	-0.000808414	0.00104177	0.9488	0.0122291	0.00642072	0.0181444	0.0002	0.0122471	0.00637867	0.0183251	0.00147224	-0.0660086	0.0850622	0.949
703	TG(58:9) [NL-22:6]	6.5324e-05	-0.00193807	0.00204239	0.9492	0.0121818	0.0067156	0.0178751	0	0.0122471	0.00645078	0.0181533	0.00533383	-0.158247	0.166765	0.9492
125	SM(40:3) (a)	-1.58067e-05	-0.000525137	0.000464037	0.9492	0.0122629	0.00632226	0.0183311	0	0.0122471	0.00630109	0.0183143	-0.00129065	-0.0428785	0.0378895	0.9492
463	PE(P-20:0/18:1)	1.93193e-06	-0.000271872	0.000222881	0.9504	0.0122452	0.00638927	0.0183035	0	0.0122471	0.00643169	0.0182702	0.000157745	-0.0221988	0.0181987	0.9504
716	TG(O-52:2) [NL-17:1]	1.43625e-05	-0.000542888	0.00058153	0.9504	0.0122327	0.006261	0.0182489	0.0006	0.0122471	0.00633487	0.0182192	0.00117273	-0.0443279	0.047483	0.9506
538	CE(17:0)	-1.18885e-06	-0.000300489	0.000352531	0.9512	0.0122483	0.00641297	0.0181086	0	0.0122471	0.00642922	0.0181214	-9.70722e-05	-0.0245355	0.0287848	0.9512
13	Cer(d18:0/24:1)	-2.94374e-05	-0.000956936	0.000806985	0.9518	0.0122765	0.00638502	0.0185253	0	0.0122471	0.00645427	0.0184155	-0.00240362	-0.0781357	0.0658919	0.9518
163	PA(34:1)	1.46513e-05	-0.000298414	0.000362069	0.9528	0.0122325	0.00628637	0.0180501	0	0.0122471	0.00629968	0.0180839	0.0011963	-0.0243661	0.0295637	0.9528
98	Hex2Cer(d18:2/16:0)	9.7854e-06	-0.000306768	0.000363661	0.9542	0.0122373	0.00622146	0.0182519	0	0.0122471	0.006213	0.0183052	0.000798997	-0.0250482	0.0296936	0.9542
449	PE(P-18:1/18:3)	-8.94576e-06	-0.000471923	0.000401138	0.9544	0.0122561	0.00635544	0.0182633	0	0.0122471	0.00631535	0.0182133	-0.000730439	-0.0385334	0.0327537	0.9544
68	Cer(m18:0/24:1)	-2.97031e-06	-0.000299206	0.000244059	0.9546	0.0122501	0.00620272	0.0182932	0	0.0122471	0.00623893	0.0182638	-0.000242531	-0.0244307	0.0199279	0.9546
638	TG(50:0) [NL-18:0]	-1.89321e-05	-0.000716488	0.000617033	0.9554	0.012266	0.00652307	0.0184386	0	0.0122471	0.00651038	0.0183466	-0.00154584	-0.0585026	0.0503819	0.9554
15	Cer(d16:1/18:0)	-2.04103e-07	-0.000300862	0.000252378	0.9562	0.0122473	0.00632977	0.0182746	0	0.0122471	0.00633605	0.0182084	-1.66654e-05	-0.0245659	0.0206072	0.9562
568	FA(14:0)	-6.73704e-06	-0.00034955	0.000261365	0.9566	0.0122538	0.00628558	0.0183986	0	0.0122471	0.0062939	0.0184096	-0.000550092	-0.0285414	0.021341	0.9566
192	PC(16:1_22:6)	-1.18901e-06	-0.000415704	0.000363298	0.9574	0.0122483	0.00637743	0.0183404	0	0.0122471	0.00636602	0.0183322	-9.70851e-05	-0.033943	0.029664	0.9574
466	PE(P-20:0/22:6)	-7.90177e-06	-0.000323941	0.000306268	0.9582	0.012255	0.00632092	0.0182455	0	0.0122471	0.00629928	0.0182847	-0.000645195	-0.0264504	0.0250073	0.9582
396	PE(20:0_20:4)	-9.01223e-06	-0.000325668	0.000283549	0.9584	0.0122561	0.00632872	0.0181289	0	0.0122471	0.00636183	0.0180772	-0.000735866	-0.0265914	0.0231523	0.9584
455	PE(P-18:1/20:5) (b)	6.74997e-06	-0.000510197	0.000484742	0.9588	0.0122404	0.00619167	0.0182116	0.0004	0.0122471	0.00621813	0.0182358	0.000551148	-0.0416586	0.0395801	0.9588
150	SM(d18:1/23:0)/SM(d17:1/24:0)	-9.07548e-06	-0.000338356	0.000277847	0.9602	0.0122562	0.00632571	0.0182102	0	0.0122471	0.00633867	0.0181744	-0.00074103	-0.0276274	0.0226868	0.9602
104	Hex3Cer(d18:1/24:0)	1.35337e-06	-0.000348294	0.000376367	0.961	0.0122458	0.00628836	0.0182032	0.0002	0.0122471	0.00631972	0.0182496	0.000110506	-0.0284389	0.0307311	0.9608
58	Cer(d19:1/26:0)	-8.80961e-06	-0.000338326	0.000294084	0.9618	0.0122559	0.00625648	0.0184308	0.0002	0.0122471	0.00625948	0.0184052	-0.000719322	-0.027625	0.0240125	0.962
220	PC(33:0) (b)	-1.20877e-05	-0.000325575	0.000297953	0.962	0.0122592	0.006379	0.018314	0	0.0122471	0.00640933	0.0182991	-0.000986983	-0.0265839	0.0243285	0.962
8	Cer(d18:0/16:0)	-9.50664e-07	-0.000473852	0.000354775	0.9624	0.0122481	0.00656463	0.0182526	0	0.0122471	0.00652514	0.0182477	-7.76235e-05	-0.0386909	0.028968	0.9624
363	PE(15-MHDA_18:1)	2.16461e-05	-0.000496103	0.000459496	0.963	0.0122255	0.00627637	0.0184829	0	0.0122471	0.00624551	0.0184491	0.00176745	-0.0405078	0.0375187	0.963
423	PE(P-16:0/20:4)	6.03474e-06	-0.00029148	0.000313916	0.9632	0.0122411	0.00629233	0.0181717	0	0.0122471	0.00629955	0.0181764	0.000492748	-0.0237999	0.0256318	0.9632
20	Cer(d16:1/24:1)	8.12565e-06	-0.000440328	0.000438639	0.9634	0.012239	0.00643828	0.018295	0.0002	0.0122471	0.00643554	0.0183387	0.000663475	-0.0359536	0.0358157	0.9636
677	TG(54:3) [NL-18:1]	1.26049e-05	-0.000762583	0.00076633	0.964	0.0122345	0.00632489	0.0184048	0	0.0122471	0.00637553	0.0183446	0.00102921	-0.0622664	0.0625723	0.964
196	PC(17:0_22:6)	2.15111e-05	-0.0011099	0.00109229	0.9654	0.0122256	0.00631463	0.0182125	0	0.0122471	0.00630371	0.0182815	0.00175642	-0.0906257	0.0891879	0.965
77	HexCer(d16:1/20:0)	1.47811e-05	-0.000317825	0.000341876	0.9658	0.0122323	0.00625163	0.0182637	0	0.0122471	0.00628125	0.0182755	0.00120691	-0.025951	0.0279149	0.9658
127	SM(41:0)	9.35374e-06	-0.0003391	0.000355418	0.966	0.0122378	0.00626075	0.0183049	0.0002	0.0122471	0.00631035	0.0183208	0.000763751	-0.0276882	0.0290206	0.9662
241	PC(O-16:0/22:6)	-1.25745e-05	-0.000443772	0.00042101	0.9662	0.0122597	0.00628015	0.0184927	0	0.0122471	0.00630755	0.0184457	-0.00102673	-0.0362349	0.0343763	0.9664
52	Cer(d19:1/18:0)	-6.33854e-06	-0.000469668	0.000464101	0.9682	0.0122534	0.00639499	0.0181525	0.0002	0.0122471	0.00639425	0.018142	-0.000517554	-0.0383493	0.0378947	0.9684
407	PE(O-18:0/22:6)	2.82563e-06	-0.000769806	0.000855528	0.9696	0.0122443	0.00629906	0.0181705	0.0004	0.0122471	0.00622224	0.0182991	0.000230718	-0.0628561	0.0698555	0.9692
120	SM(35:2) (b)	-7.33784e-06	-0.000478711	0.000460652	0.9694	0.0122544	0.00629277	0.0181961	0	0.0122471	0.00625582	0.0182257	-0.000599149	-0.0390877	0.0376131	0.9694
19	Cer(d16:1/24:0)	1.84007e-06	-0.000249985	0.000286388	0.9696	0.0122453	0.00627816	0.0183848	0	0.0122471	0.00628501	0.0183976	0.000150246	-0.0204118	0.0233841	0.9696
114	Sulfatide (d18:1:/16:0)	1.56831e-05	-0.000364614	0.000404931	0.971	0.0122314	0.00636396	0.0182382	0	0.0122471	0.00638498	0.0182601	0.00128056	-0.0297714	0.0330634	0.971
56	Cer(d19:1/24:0)	5.62115e-06	-0.000421314	0.00044684	0.9716	0.0122415	0.00614807	0.0182897	0	0.0122471	0.00618258	0.0182463	0.000458978	-0.0344011	0.0364853	0.9716
36	Cer(d18:1/23:0)	-2.1232e-06	-0.000330827	0.000284106	0.9718	0.0122492	0.00632584	0.0183229	0	0.0122471	0.00635161	0.0183217	-0.000173363	-0.0270126	0.0231978	0.9718
413	PE(O-38:5) (b)	-2.24338e-05	-0.00112457	0.00100143	0.9714	0.0122695	0.00653624	0.01822	0.0002	0.0122471	0.00640412	0.0182895	-0.00183176	-0.0918237	0.0817688	0.9718
260	PC(P-15:0/20:4) (a)	-4.19044e-06	-0.000356299	0.000318116	0.9738	0.0122513	0.00625108	0.0183647	0.0002	0.0122471	0.00623698	0.0183944	-0.000342158	-0.0290925	0.0259748	0.9736
426	PE(P-16:0/22:5) (n3)	1.29777e-05	-0.000343134	0.000350148	0.9754	0.0122341	0.00629483	0.018189	0.0002	0.0122471	0.00632729	0.0181872	0.00105965	-0.0280175	0.0285903	0.9752
117	Sulfatide (d18:1:/24:1(OH))	-6.27526e-06	-0.000375893	0.000332815	0.976	0.0122534	0.00638989	0.0183342	0.0002	0.0122471	0.00635398	0.0183648	-0.000512387	-0.0306924	0.027175	0.9758
358	LPC(P-17:0) (a)	6.67748e-06	-0.0004754	0.000459239	0.9774	0.0122404	0.00635477	0.0182949	0.0002	0.0122471	0.0063534	0.0182972	0.000545229	-0.0388173	0.0374978	0.9776
529	PS(40:6)	1.34625e-06	-0.000287596	0.000305213	0.9788	0.0122458	0.00630134	0.0181456	0.0002	0.0122471	0.00630023	0.0181532	0.000109924	-0.0234828	0.0249212	0.9786
134	SM(44:3)	-1.33627e-05	-0.000328848	0.000323998	0.979	0.0122605	0.00638408	0.0183202	0	0.0122471	0.0063594	0.0183079	-0.00109109	-0.0268511	0.026455	0.979
231	PC(38:7)(c)	-7.30506e-06	-0.000356163	0.00034292	0.979	0.0122544	0.00639454	0.0181963	0.0002	0.0122471	0.00637153	0.0181448	-0.000596472	-0.0290814	0.0280001	0.9792
613	DG(18:0_22:6)	9.85068e-07	-0.000403207	0.000401371	0.9796	0.0122461	0.00636249	0.0183518	0	0.0122471	0.00638641	0.0182881	8.04327e-05	-0.0329226	0.0327727	0.9796
513	PI(39:6)	-1.90052e-05	-0.00141681	0.00134895	0.9796	0.0122661	0.00651696	0.0181035	0	0.0122471	0.00641081	0.0181166	-0.00155181	-0.115685	0.110144	0.9796
720	TG(O-54:3) [NL-17:1]	-8.37091e-08	-0.00029646	0.0002656	0.9798	0.0122472	0.00637375	0.0183903	0.0002	0.0122471	0.00635866	0.01841	-6.83501e-06	-0.0242065	0.0216868	0.98
374	PE(16:0_20:4)	-6.81089e-07	-0.000316219	0.000293748	0.98	0.0122478	0.00621961	0.0182831	0	0.0122471	0.00616683	0.0183102	-5.56122e-05	-0.0258199	0.0239851	0.98
172	PC(15-MHDA_18:1)	8.80773e-06	-0.000842548	0.000836125	0.981	0.0122383	0.00630413	0.0182513	0.0002	0.0122471	0.00633559	0.0182375	0.000719168	-0.0687956	0.0682712	0.9812
96	Hex2Cer(d18:1/24:0)	-1.19498e-06	-0.000288371	0.000300397	0.9824	0.0122483	0.00623766	0.0182722	0	0.0122471	0.00627883	0.0182557	-9.75728e-05	-0.023546	0.024528	0.9824
287	LPC(14:0) [sn2]	-2.56711e-05	-0.00136629	0.00127962	0.9824	0.0122728	0.00656834	0.0180744	0.0002	0.0122471	0.00637524	0.0182409	-0.00209609	-0.111561	0.104483	0.9824
177	PC(15:0_20:4)	-3.67511e-06	-0.000465892	0.000462424	0.9836	0.0122508	0.00636874	0.0182652	0	0.0122471	0.00635554	0.0182437	-0.00030008	-0.038041	0.0377578	0.9838
44	Cer(d18:2/20:0)	1.35343e-05	-0.000369558	0.00033906	0.9848	0.0122336	0.00626853	0.018183	0	0.0122471	0.00623431	0.0182029	0.0011051	-0.0301751	0.0276849	0.9848
579	FA(20:2)	-3.76714e-06	-0.000530466	0.000435391	0.9848	0.0122509	0.00634768	0.0182256	0	0.0122471	0.00634741	0.0181649	-0.000307594	-0.0433135	0.0355505	0.9848
138	SM(d17:1/14:0)	3.75502e-06	-0.000303749	0.000295273	0.9866	0.0122434	0.00637139	0.0183275	0	0.0122471	0.00638588	0.0182978	0.000306605	-0.0248017	0.0241096	0.9866
524	PS(36:2)	-2.73982e-06	-0.000286457	0.000273374	0.9884	0.0122498	0.006288	0.0182927	0.0002	0.0122471	0.0062678	0.0182879	-0.000223712	-0.0233898	0.0223215	0.9882
318	LPC(19:1) (c)	-1.38596e-06	-0.000305046	0.000306529	0.9888	0.0122485	0.00636067	0.0182495	0.0002	0.0122471	0.00633018	0.018219	-0.000113166	-0.0249076	0.0250287	0.989
136	SM(d16:1/23:0)/SM(d17:1/22:0)	1.60183e-06	-0.000298005	0.000318283	0.9898	0.0122455	0.00639209	0.0182027	0	0.0122471	0.00640746	0.018188	0.000130793	-0.0243327	0.0259884	0.9898
341	LPC(22:6) [sn1]	-9.84084e-06	-0.00127659	0.001129	0.99	0.012257	0.00644559	0.0181457	0	0.0122471	0.00632867	0.0182167	-0.000803524	-0.104236	0.0921849	0.9902
123	SM(38:3) (a)	4.16857e-06	-0.000331954	0.000307149	0.9906	0.0122429	0.00642219	0.0182178	0.0002	0.0122471	0.00640146	0.0182023	0.000340372	-0.0271047	0.0250793	0.9904
64	Cer(m18:0/20:0)	3.13277e-06	-0.000313533	0.000300693	0.9912	0.012244	0.00625092	0.018276	0	0.0122471	0.00626786	0.0182424	0.000255797	-0.0256006	0.0245522	0.9912
139	SM(d17:1/16:0)	9.4969e-07	-0.00029287	0.00027854	0.9912	0.0122462	0.00622842	0.0179987	0	0.0122471	0.00625609	0.0179928	7.7544e-05	-0.0239134	0.0227433	0.9914
675	TG(54:2) [NL-18:0]	-1.2073e-05	-0.00103614	0.000961113	0.992	0.0122592	0.00639252	0.0183674	0	0.0122471	0.00643472	0.0182673	-0.000985783	-0.0846026	0.0784767	0.9918
300	LPC(17:1) [sn1] (b)	-1.07842e-05	-0.000695574	0.000709522	0.9926	0.0122579	0.00643186	0.0182934	0.0002	0.0122471	0.00638318	0.0183851	-0.000880553	-0.056795	0.0579339	0.9924
507	PI(34:0)	3.80341e-06	-0.000697087	0.000607397	0.993	0.0122433	0.006492	0.0181941	0	0.0122471	0.00634685	0.0182655	0.000310556	-0.0569185	0.0495951	0.9928
440	PE(P-18:0/22:4)	4.52216e-06	-0.000306786	0.0002948	0.9936	0.0122426	0.00631244	0.0184163	0	0.0122471	0.00632313	0.0184172	0.000369243	-0.0250496	0.024071	0.9936
166	PA(36:3)	3.44706e-07	-0.000323112	0.000323983	0.995	0.0122468	0.00627647	0.0181671	0	0.0122471	0.00630491	0.0181534	2.81459e-05	-0.0263827	0.0264539	0.995
616	DG(18:1_18:3)	-1.0658e-05	-0.00111585	0.00102331	0.995	0.0122578	0.00628653	0.0183179	0	0.0122471	0.00618281	0.0182332	-0.000870242	-0.091111	0.0835556	0.995
216	PC(31:0) (b)	-2.60843e-06	-0.000284115	0.000307539	0.9954	0.0122497	0.00648474	0.0183775	0	0.0122471	0.0064925	0.0183394	-0.000212983	-0.0231986	0.0251112	0.9954
369	PE(16:0_18:1)	1.51336e-05	-0.000315123	0.000313783	0.9962	0.012232	0.0064142	0.018257	0.0002	0.0122471	0.00642352	0.0182146	0.00123569	-0.0257304	0.025621	0.996
116	Sulfatide (d18:1:/24:0)	2.16008e-06	-0.000522612	0.000557647	0.996	0.012245	0.00634138	0.0184116	0	0.0122471	0.00630992	0.0184307	0.000176374	-0.0426723	0.0455329	0.996
39	Cer(d18:1/26:0)	-8.5711e-07	-0.000282816	0.000286124	0.9962	0.012248	0.00643522	0.0181209	0	0.0122471	0.00646921	0.018121	-6.99847e-05	-0.0230925	0.0233626	0.9962
706	TG(O-50:1) [NL-17:1]	8.18675e-06	-0.000300514	0.000285562	0.9964	0.0122389	0.00633492	0.0182133	0	0.0122471	0.0063533	0.0181916	0.000668464	-0.0245376	0.0233167	0.9964
258	PC(O-40:7) (a)	-6.79299e-06	-0.000542462	0.000587044	0.997	0.0122539	0.00649834	0.0182129	0.0002	0.0122471	0.00647011	0.0182483	-0.000554661	-0.0442931	0.0479332	0.9968
384	PE(18:0_18:2)	9.85787e-06	-0.000308532	0.000279806	0.9974	0.0122373	0.00639518	0.0183478	0.0002	0.0122471	0.00638908	0.0183263	0.000804914	-0.0251922	0.0228467	0.9974
523	PS(36:1)	5.9894e-06	-0.000456409	0.000408036	0.9988	0.0122411	0.00653933	0.0184829	0.0002	0.0122471	0.00655274	0.0184423	0.000489046	-0.0372667	0.0333169	0.9986
284	PC(P-38:5) (a)	-2.58292e-06	-0.000290691	0.000299644	0.999	0.0122497	0.00652394	0.0182365	0	0.0122471	0.00652563	0.0182605	-0.0002109	-0.0237354	0.0244665	0.999

## Sheet: Supp 4
Supp 4. Linear regression between infant 6-month lipidome and infant 6-month BMI z score
#	Lipid	Beta	LCI	UCI	p value	BH p value
1	Sph(d16:1)	0.0632623	0.000573652	0.125951	0.0483174	0.305316
2	Sph(d18:1)	0.0890479	0.0240685	0.154027	0.00739843	0.115237
3	Sph(d18:2)	0.0337357	-0.0321739	0.0996453	0.316091	0.697878
4	S1P(d16:1)	0.10445	0.0442222	0.164679	0.000713333	0.0307572
5	S1P(d18:0)	0.0535733	-0.0117784	0.118925	0.108549	0.452082
6	S1P(d18:1)	0.0662399	0.0007418	0.131738	0.0478374	0.304911
7	S1P(d18:2)	0.120154	0.0559117	0.184397	0.000264691	0.019047
8	Cer(d18:0/16:0)	-0.0433961	-0.107791	0.0209983	0.186966	0.571561
9	Cer(d18:0/18:0)	-0.00392667	-0.0519174	0.0440641	0.872635	0.971821
10	Cer(d18:0/20:0)	-0.0135343	-0.0675297	0.040461	0.623373	0.890226
11	Cer(d18:0/22:0)	-0.0204045	-0.0841871	0.0433781	0.530846	0.846012
12	Cer(d18:0/24:0)	-0.0420847	-0.10512	0.0209511	0.191102	0.576452
13	Cer(d18:0/24:1)	-0.0564375	-0.10645	-0.00642472	0.0272952	0.22997
14	Cer(d16:1/16:0)	0.0868191	0.0313348	0.142303	0.00224393	0.0651743
15	Cer(d16:1/18:0)	0.145352	0.0813772	0.209327	9.80793e-06	0.0023964
16	Cer(d16:1/20:0)	0.118187	0.0578886	0.178486	0.000133	0.0111785
17	Cer(d16:1/22:0)	0.074254	0.0230172	0.125491	0.00463172	0.0970014
18	Cer(d16:1/23:0)	0.0674079	0.0173241	0.117492	0.00852084	0.115237
19	Cer(d16:1/24:0)	0.046517	-0.00349795	0.0965319	0.0687304	0.364295
20	Cer(d16:1/24:1)	0.0779058	0.0165505	0.139261	0.013046	0.142968
21	Cer(d17:1/16:0)	0.11143	0.0473298	0.175529	0.000692817	0.0307572
22	Cer(d17:1/18:0)	0.0800147	0.0205615	0.139468	0.00852365	0.115237
23	Cer(d17:1/20:0)	0.0900744	0.0270974	0.153051	0.00519396	0.0993498
24	Cer(d17:1/22:0)	0.0959733	0.0337089	0.158238	0.0026078	0.070797
25	Cer(d17:1/23:0)	0.0683016	0.00880595	0.127797	0.0247442	0.226719
26	Cer(d17:1/24:0)	0.0734103	0.0118913	0.134929	0.0196158	0.196236
27	Cer(d17:1/24:1)	0.0668167	0.0029879	0.130646	0.0405557	0.276364
28	Cer(d18:1/14:0)	0.0474844	-0.0176731	0.112642	0.153618	0.518125
29	Cer(d18:1/16:0)	0.0304812	-0.0317247	0.0926871	0.337172	0.712239
30	Cer(d18:1/17:0)	0.0106362	-0.0529618	0.0742342	0.743164	0.937589
31	Cer(d18:1/18:0)	0.0464414	-0.0027893	0.095672	0.0648752	0.360254
32	Cer(d18:1/19:0)	0.0286042	-0.0288009	0.0860092	0.329075	0.705297
33	Cer(d18:1/20:0)	0.0477249	-0.00788264	0.103332	0.0929719	0.43602
34	Cer(d18:1/21:0)	0.0177735	-0.0420232	0.0775703	0.560361	0.85808
35	Cer(d18:1/22:0)	0.041558	-0.0220556	0.105172	0.200802	0.594571
36	Cer(d18:1/23:0)	0.0500083	-0.0100077	0.110024	0.102872	0.440964
37	Cer(d18:1/24:0)	0.0362863	-0.0264916	0.0990642	0.257633	0.660556
38	Cer(d18:1/24:1)	-0.00299182	-0.0577335	0.0517499	0.914723	0.985248
39	Cer(d18:1/26:0)	-0.00682477	-0.0710092	0.0573597	0.834969	0.967915
40	Cer(d18:2/14:0)	0.129086	0.0640075	0.194165	0.000110546	0.0111785
41	Cer(d18:2/16:0)	0.112081	0.0491105	0.175051	0.000515126	0.0307572
42	Cer(d18:2/17:0)	0.0373384	-0.0276538	0.102331	0.260528	0.660556
43	Cer(d18:2/18:0)	0.119654	0.0650533	0.174255	1.98517e-05	0.00291026
44	Cer(d18:2/20:0)	0.146706	0.0867636	0.206649	1.95899e-06	0.00143594
45	Cer(d18:2/21:0)	0.0990572	0.0343123	0.163802	0.00280466	0.0734221
46	Cer(d18:2/22:0)	0.111398	0.047577	0.17522	0.000658883	0.0307572
47	Cer(d18:2/23:0)	0.0909633	0.0307677	0.151159	0.00315914	0.0777647
48	Cer(d18:2/24:0)	0.0819905	0.0205374	0.143444	0.00910908	0.117088
49	Cer(d18:2/24:1)	0.0570524	-0.00425539	0.11836	0.0685737	0.364295
50	Cer(d18:2/26:0)	0.0308028	-0.031857	0.0934625	0.335615	0.712239
51	Cer(d19:1/16:0)	-0.00676091	-0.0600052	0.0464834	0.803525	0.960822
52	Cer(d19:1/18:0)	0.0545866	0.0122232	0.0969499	0.0117664	0.136902
53	Cer(d19:1/20:0)	0.038757	-0.00899502	0.086509	0.112095	0.453333
54	Cer(d19:1/22:0)	0.0302919	-0.0146753	0.0752591	0.187141	0.571561
55	Cer(d19:1/23:0)	0.0354597	-0.014069	0.0849883	0.160975	0.519799
56	Cer(d19:1/24:0)	0.0249345	-0.0214256	0.0712946	0.292157	0.685962
57	Cer(d19:1/24:1)	0.0131382	-0.0271512	0.0534276	0.52293	0.844142
58	Cer(d19:1/26:0)	0.0163222	-0.0464316	0.0790761	0.610352	0.885528
59	Cer(d20:1/22:0)	-0.00767635	-0.0635655	0.0482128	0.787849	0.951895
60	Cer(d20:1/23:0)	0.00906695	-0.0517316	0.0698655	0.770144	0.951895
61	Cer(d20:1/24:0)	0.00142566	-0.0590582	0.0619095	0.963164	0.997175
62	Cer(d20:1/24:1)	-0.0265978	-0.0730662	0.0198706	0.262291	0.660556
63	Cer(d20:1/26:0)	0.0722128	0.00674336	0.137682	0.0309567	0.251753
64	Cer(m18:0/20:0)	0.0462417	-0.00878315	0.101267	0.0999658	0.440964
65	Cer(m18:0/22:0)	0.0226628	-0.0424359	0.0877614	0.495247	0.844142
66	Cer(m18:0/23:0)	0.0389613	-0.0241251	0.102048	0.226496	0.626498
67	Cer(m18:0/24:0)	0.0190499	-0.0459177	0.0840176	0.565664	0.862021
68	Cer(m18:0/24:1)	-0.0121614	-0.0710748	0.0467521	0.685893	0.915425
69	Cer(m18:1/18:0)	-0.00484761	-0.0534005	0.0437052	0.844908	0.967915
70	Cer(m18:1/20:0)	0.0130672	-0.0392023	0.0653367	0.624288	0.890226
71	Cer(m18:1/22:0)	0.0115608	-0.0527804	0.075902	0.724812	0.931246
72	Cer(m18:1/23:0)	0.0262365	-0.0382663	0.0907393	0.425581	0.790933
73	Cer(m18:1/24:0)	0.0145118	-0.0507269	0.0797504	0.662978	0.914302
74	Cer(m18:1/24:1)	-0.00159957	-0.0577334	0.0545342	0.955476	0.99323
75	Cer1P(d18:1/16:0)	-0.0136454	-0.0799609	0.0526702	0.686849	0.915425
76	HexCer(d16:1/18:0)	0.0645363	0.00278505	0.126288	0.0408836	0.276364
77	HexCer(d16:1/20:0)	0.0573681	-0.0069197	0.121656	0.080712	0.402462
78	HexCer(d16:1/22:0)	0.0635896	0.00532884	0.12185	0.0327498	0.251753
79	HexCer(d16:1/24:0)	0.0737394	0.0133434	0.134135	0.0169656	0.180229
80	HexCer(d18:1/16:0)	0.0325136	-0.0280277	0.093055	0.292872	0.685962
81	HexCer(d18:1/18:0)	-0.00894197	-0.0568473	0.0389634	0.714583	0.927061
82	HexCer(d18:1/20:0)	0.00831611	-0.0446032	0.0612354	0.758166	0.94596
83	HexCer(d18:1/22:0)	0.0162882	-0.0461771	0.0787534	0.609451	0.885528
84	HexCer(d18:1/24:0)	0.0345375	-0.0270364	0.0961113	0.271968	0.674933
85	HexCer(d18:1/24:1)	-0.00379742	-0.0602889	0.052694	0.895216	0.976478
86	HexCer(d18:2/18:0)	0.0430097	-0.00891991	0.0949393	0.104957	0.445034
87	HexCer(d18:2/20:0)	0.0728535	0.0163611	0.129346	0.0116961	0.136902
88	HexCer(d18:2/22:0)	0.0717662	0.00954973	0.133983	0.024067	0.226168
89	HexCer(d18:2/24:0)	0.0692844	0.00827119	0.130298	0.0263433	0.227841
90	Hex2Cer(d16:1/16:0)	0.0181654	-0.0402469	0.0765778	0.542364	0.851291
91	Hex2Cer(d16:1/24:1)	0.0380893	-0.0229678	0.0991465	0.221841	0.626498
92	Hex2Cer(d18:1/16:0)	7.60521e-05	-0.0646918	0.0648439	0.998164	0.998229
93	Hex2Cer(d18:1/18:0)	-0.049445	-0.114244	0.0153535	0.135198	0.495502
94	Hex2Cer(d18:1/20:0)	0.00465478	-0.0532959	0.0626054	0.874947	0.971821
95	Hex2Cer(d18:1/22:0)	0.00179504	-0.062899	0.0664891	0.956645	0.99323
96	Hex2Cer(d18:1/24:0)	0.000359631	-0.0647013	0.0654206	0.991359	0.998229
97	Hex2Cer(d18:1/24:1)	-0.00480885	-0.0694631	0.0598454	0.884135	0.97308
98	Hex2Cer(d18:2/16:0)	0.0294401	-0.0326716	0.0915518	0.353194	0.729272
99	Hex2Cer(d18:2/24:1)	0.0574834	-0.00478278	0.11975	0.0707988	0.370682
100	Hex3Cer(d18:1/16:0)	0.00482407	-0.0579732	0.0676213	0.88036	0.97308
101	Hex3Cer(d18:1/18:0)	-0.0681418	-0.12818	-0.00810374	0.0264208	0.227841
102	Hex3Cer(d18:1/20:0)	-0.0185751	-0.0786036	0.0414534	0.544376	0.852623
103	Hex3Cer(d18:1/22:0)	-0.0344584	-0.0998608	0.030944	0.30211	0.692022
104	Hex3Cer(d18:1/24:0)	-0.0235336	-0.0884824	0.0414151	0.477817	0.833904
105	Hex3Cer(d18:1/24:1)	-0.0721737	-0.135041	-0.00930644	0.0247413	0.226719
106	GM3(d18:1/16:0)	0.0386141	-0.0238387	0.101067	0.225966	0.626498
107	GM3(d18:1/18:0)	-0.00258862	-0.0544659	0.0492887	0.922117	0.986732
108	GM3(d18:1/20:0)	0.038191	-0.0163729	0.092755	0.170533	0.536738
109	GM3(d18:1/22:0)	0.0182363	-0.0433965	0.0798691	0.56214	0.858434
110	GM3(d18:1/24:0)	-0.0132748	-0.0775013	0.0509517	0.685519	0.915425
111	GM3(d18:1/24:1)	-0.0279106	-0.0815453	0.0257242	0.308096	0.695471
112	GM1(d18:1/16:0)	0.0506843	-0.0134902	0.114859	0.122066	0.46845
113	Sulfatide (d18:1:/16:0(OH))	-0.0334798	-0.0978164	0.0308568	0.308093	0.695471
114	Sulfatide (d18:1:/16:0)	-0.00363645	-0.0678168	0.0605439	0.911605	0.985248
115	Sulfatide (d18:1:/24:0(OH))	-0.0536373	-0.119015	0.01174	0.108266	0.452082
116	Sulfatide (d18:1:/24:0)	-0.00269499	-0.0685631	0.0631732	0.936106	0.990414
117	Sulfatide (d18:1:/24:1(OH))	-0.0874419	-0.149413	-0.0254705	0.00582816	0.0993498
118	Sulfatide (d18:1:/24:1)	-0.0512298	-0.115509	0.0130497	0.118707	0.46283
119	SM(34:3)	0.0884765	0.0235294	0.153424	0.00775466	0.115237
120	SM(35:2) (b)	-0.0160712	-0.0743203	0.0421779	0.588832	0.883815
121	SM(37:1)	0.0490347	-0.0140254	0.112095	0.127931	0.485872
122	SM(37:2)	0.0239223	-0.0231983	0.0710428	0.320044	0.698191
123	SM(38:3) (a)	0.0938578	0.033698	0.154018	0.00231178	0.0651743
124	SM(38:3) (b)	0.0429623	-0.00115501	0.0870797	0.0567005	0.337898
125	SM(40:3) (a)	0.0741932	0.00859898	0.139787	0.026939	0.229608
126	SM(40:3) (b)	0.0252675	-0.0166421	0.0671771	0.237718	0.645361
127	SM(41:0)	-0.0827231	-0.144494	-0.0209527	0.00885323	0.115883
128	SM(41:1) (a)	0.0213591	-0.0318205	0.0745388	0.431415	0.790933
129	SM(43:1)	-0.0167379	-0.0686287	0.0351529	0.527445	0.844142
130	SM(43:2) (b)	-0.0453434	-0.0911097	0.00042282	0.0525404	0.319881
131	SM(43:2) (c)	-0.0210606	-0.0846181	0.042497	0.516242	0.844142
132	SM(44:1)	-0.0628411	-0.124017	-0.00166505	0.0444504	0.290912
133	SM(44:2)	-0.0687702	-0.122551	-0.0149892	0.0124211	0.140072
134	SM(44:3)	9.43594e-05	-0.0636409	0.0638296	0.997686	0.998229
135	SM(d16:1/19:0)	-0.0041045	-0.0463887	0.0381797	0.849162	0.967915
136	SM(d16:1/23:0)/SM(d17:1/22:0)	0.0437566	-0.0115563	0.0990695	0.12146	0.46845
137	SM(d16:1/24:1)	0.0312981	-0.0324531	0.0950493	0.336249	0.712239
138	SM(d17:1/14:0)	0.0698604	0.00609759	0.133623	0.0320925	0.251753
139	SM(d17:1/16:0)	0.0321419	-0.0311274	0.0954112	0.319724	0.698191
140	SM(d17:1/24:1)	0.00418884	-0.051731	0.0601087	0.883316	0.97308
141	SM(d18:0/14:0)	-0.00940379	-0.0749167	0.0561092	0.778531	0.951895
142	SM(d18:0/16:0)	-0.0516078	-0.110091	0.00687536	0.0841346	0.408862
143	SM(d18:0/22:0)	-0.0867609	-0.147042	-0.0264797	0.00491991	0.0993498
144	SM(d18:1/14:0/SM(d16:1/16:0)	0.0314226	-0.0307163	0.0935615	0.321951	0.698196
145	SM(d18:1/16:0)	-0.0197691	-0.0788253	0.039287	0.511962	0.844142
146	SM(d18:1/17:0)/SM(d17:1/18:0)	0.0189211	-0.0257204	0.0635627	0.406398	0.787113
147	SM(d18:1/18:0/SM(d16:1/20:0)	0.0178499	-0.0371298	0.0728295	0.524757	0.844142
148	SM(d18:1/20:0)/SM(d16:1/22:0)	0.0504416	-0.0100921	0.110975	0.102858	0.440964
149	SM(d18:1/22:0)/SM(d16:1/24:0)	0.00254143	-0.060409	0.0654919	0.936952	0.990414
150	SM(d18:1/23:0)/SM(d17:1/24:0)	-0.00886885	-0.0703531	0.0526154	0.777471	0.951895
151	SM(d18:1/24:0)	-0.0610535	-0.126179	0.00407198	0.0665559	0.361122
152	SM(d18:1/24:1)	-0.0665683	-0.122443	-0.0106939	0.019811	0.196236
153	SM(d18:2/14:0)	0.142666	0.0805979	0.204734	7.73902e-06	0.0023964
154	SM(d18:2/16:0)	0.0478962	-0.00914962	0.104942	0.100276	0.440964
155	SM(d18:2/17:0)	0.0195763	-0.0268884	0.0660409	0.409204	0.787113
156	SM(d18:2/18:0)	0.0321918	-0.0137506	0.0781341	0.170065	0.536738
157	SM(d18:2/18:1)	0.0176769	-0.033881	0.0692347	0.501802	0.844142
158	SM(d18:2/20:0)	0.0609663	0.00725331	0.114679	0.0264127	0.227841
159	SM(d18:2/22:0)	0.0611796	-0.00296808	0.125327	0.0619857	0.35776
160	SM(d18:2/23:0)	0.0471057	-0.0166758	0.110887	0.148177	0.51233
161	SM(d18:2/24:0)	0.0220038	-0.0432793	0.087287	0.509066	0.844142
162	SM(d19:1/24:1)	-0.00549667	-0.0448553	0.0338619	0.784374	0.951895
163	PA(34:1)	0.0771707	0.0120116	0.14233	0.0205488	0.20083
164	PA(36:1)	0.06625	0.00111033	0.13139	0.0465941	0.299592
165	PA(36:2)	0.069541	0.00500542	0.134077	0.0350292	0.257591
166	PA(36:3)	0.0460782	-0.0181658	0.110322	0.16022	0.519652
167	PA(36:4)	0.0707804	0.00548063	0.13608	0.0339687	0.254072
168	PA(40:6)	0.0230471	-0.0426485	0.0887427	0.491926	0.844142
169	PC(14:0_16:0)	-0.00429324	-0.0645384	0.0559519	0.888956	0.973998
170	PC(14:0_20:4)	0.0599406	-0.00458924	0.124471	0.0690819	0.364295
171	PC(14:0_22:6)	0.0415586	-0.0236581	0.106775	0.212076	0.611006
172	PC(15-MHDA_18:1)	-0.0128408	-0.0553241	0.0296424	0.553754	0.857183
173	PC(15-MHDA_18:2)	-0.0292577	-0.0784782	0.0199628	0.24438	0.649963
174	PC(15-MHDA_20:4)	-0.0099573	-0.0557348	0.0358202	0.669995	0.914399
175	PC(15-MHDA_22:6)	-0.0158233	-0.0588745	0.0272278	0.471518	0.828831
176	PC(15:0_20:3)	0.0420465	-0.0159882	0.100081	0.156032	0.518125
177	PC(15:0_20:4)	0.0166187	-0.0358073	0.0690447	0.534594	0.846012
178	PC(15:0_22:6)	0.0187798	-0.0338696	0.0714292	0.484701	0.837413
179	PC(16:0_16:0)	-0.00902665	-0.0707705	0.0527172	0.774545	0.951895
180	PC(16:0_18:0)	-0.00817844	-0.0583778	0.042021	0.749576	0.943714
181	PC(16:0_18:1)	-0.0363209	-0.101153	0.0285115	0.272552	0.674933
182	PC(16:0_18:2)	0.00021383	-0.0609657	0.0613934	0.994536	0.998229
183	PC(16:0_18:3) (a)	0.0514245	-0.0130682	0.115917	0.118529	0.46283
184	PC(16:0_18:3) (b)	0.051751	-0.0113446	0.114846	0.108363	0.452082
185	PC(16:0_20:3) (a)	0.031692	-0.030159	0.093543	0.315576	0.697878
186	PC(16:0_20:3) (b)	0.0511539	-0.00909625	0.111404	0.0965303	0.439483
187	PC(16:0_20:4)	0.0340174	-0.0263	0.0943348	0.269362	0.673864
188	PC(16:0_20:5)	-0.00405014	-0.0599642	0.0518639	0.887141	0.973952
189	PC(16:0_22:6)	-0.00942254	-0.069126	0.0502809	0.757159	0.94596
190	PC(16:1_18:2)	0.0418033	-0.0222007	0.105807	0.200907	0.594571
191	PC(16:1_20:4)	0.0661127	0.00133653	0.130889	0.0458283	0.297275
192	PC(16:1_22:6)	0.0468333	-0.0159307	0.109597	0.144037	0.502759
193	PC(17:0_18:1)	-0.0277232	-0.076176	0.0207296	0.26247	0.660556
194	PC(17:0_18:2)	-0.0524583	-0.112083	0.00716595	0.0850588	0.410185
195	PC(17:0_20:4)	-0.0111975	-0.0608061	0.038411	0.658328	0.912809
196	PC(17:0_22:6)	-0.0145689	-0.0653922	0.0362544	0.574394	0.868105
197	PC(17:1_18:2)	-0.00223788	-0.0622122	0.0577365	0.941719	0.990414
198	PC(18:0_18:1)	-0.0379366	-0.0990536	0.0231804	0.22415	0.626498
199	PC(18:0_18:2)	-0.015072	-0.0765702	0.0464263	0.63112	0.893072
200	PC(18:0_20:3)	0.0414197	-0.0165531	0.0993926	0.161838	0.520295
201	PC(18:0_20:4)	0.00940758	-0.0490988	0.067914	0.752732	0.943847
202	PC(18:0_22:4)	0.0444521	-0.0173499	0.106254	0.159043	0.518125
203	PC(18:0_22:5) (n3)	-0.0149778	-0.0631257	0.03317	0.542242	0.851291
204	PC(18:0_22:5) (n6)	0.0345593	-0.0287657	0.0978842	0.285131	0.68012
205	PC(18:0_22:6)	0.00641789	-0.0509524	0.0637882	0.826509	0.967915
206	PC(18:1_18:1)	-0.0681238	-0.131521	-0.00472686	0.0355385	0.257918
207	PC(18:1_18:2)	-0.0333861	-0.0934396	0.0266674	0.276236	0.676143
208	PC(18:1_20:3)	0.00762136	-0.0576061	0.0728488	0.818925	0.967915
209	PC(18:1_22:6) (a)	-0.0533543	-0.117789	0.0110799	0.105035	0.445034
210	PC(18:1_22:6) (b)	0.0212102	-0.0276455	0.070066	0.3951	0.780616
211	PC(18:2_18:2)	0.0277131	-0.0328575	0.0882837	0.370144	0.745373
212	PC(18:2_20:5)	0.0337959	-0.0296483	0.0972401	0.296805	0.687656
213	PC(20:0_20:4)	0.0101464	-0.0552425	0.0755353	0.761115	0.947146
214	PC(28:0)	-0.00568012	-0.0688941	0.0575338	0.860252	0.97071
215	PC(31:0) (a)	0.0235745	-0.020946	0.068095	0.299684	0.688616
216	PC(31:0) (b)	0.00381883	-0.0381874	0.0458251	0.858627	0.97071
217	PC(32:1)	-0.00258736	-0.0651238	0.0599491	0.935391	0.990414
218	PC(32:2)	0.0229304	-0.0357326	0.0815935	0.443849	0.799365
219	PC(33:0) (a)	-0.00251525	-0.0421602	0.0371297	0.901072	0.979951
220	PC(33:0) (b)	-0.00130111	-0.0432502	0.0406479	0.951541	0.99323
221	PC(33:1)	-0.011781	-0.0616726	0.0381105	0.643633	0.903799
222	PC(33:2)	0.0240331	-0.0359395	0.0840057	0.432454	0.790933
223	PC(34:5)	0.0349558	-0.0306192	0.100531	0.296462	0.687656
224	PC(35:5)	0.0170134	-0.035472	0.0694989	0.525406	0.844142
225	PC(36:6) (a)	0.0462292	-0.0138097	0.106268	0.131693	0.488564
226	PC(38:2)	-0.0139457	-0.0779424	0.050051	0.669428	0.914399
227	PC(38:4) (b)	0.067171	0.00555877	0.128783	0.0329483	0.251753
228	PC(38:5) (a)	-0.026741	-0.0838817	0.0303997	0.359318	0.735699
229	PC(38:5) (b)	0.0110728	-0.0451035	0.0672491	0.699366	0.917682
230	PC(38:6) (a)	0.0324663	-0.0316997	0.0966323	0.321673	0.698196
231	PC(38:7)(c)	0.000434753	-0.0517203	0.0525898	0.986969	0.998229
232	PC(39:5)(a)	-0.024548	-0.0728813	0.0237853	0.319846	0.698191
233	PC(39:5)(b)	-0.0272799	-0.0724618	0.0179021	0.23704	0.645361
234	PC(40:10)	0.0657246	-0.000687122	0.132136	0.0528044	0.319881
235	PC(40:7) (a)	0.032561	-0.0279209	0.0930428	0.291696	0.685962
236	PC(40:8)	0.0242277	-0.0389323	0.0873877	0.452392	0.805535
237	PC(44:12)	-0.0157437	-0.0740983	0.0426109	0.597111	0.883815
238	PC(O-16:0/16:0)	0.050117	-0.01331	0.113544	0.121894	0.46845
239	PC(O-16:0/20:3)	0.0335533	-0.0233196	0.0904261	0.247926	0.654946
240	PC(O-16:0/20:4)	0.0449056	-0.0138184	0.10363	0.134367	0.494929
241	PC(O-16:0/22:6)	0.0427875	-0.0144685	0.100043	0.143437	0.502759
242	PC(O-18:0/18:1)	-0.0246117	-0.0829442	0.0337209	0.408532	0.787113
243	PC(O-18:0/18:2)	-0.00715799	-0.0688995	0.0545835	0.820308	0.967915
244	PC(O-18:0/20:4)	-0.00111769	-0.0512696	0.0490342	0.965171	0.997666
245	PC(O-18:0/22:6)	0.000720033	-0.0485488	0.0499888	0.977156	0.998229
246	PC(O-18:1/18:1)	-0.0114402	-0.0771705	0.0542902	0.733104	0.934073
247	PC(O-18:1/18:2)	0.0189976	-0.0398911	0.0778864	0.527392	0.844142
248	PC(O-32:1)	-0.0170583	-0.0679994	0.0338828	0.511822	0.844142
249	PC(O-32:2)	-0.0144414	-0.0721101	0.0432272	0.6237	0.890226
250	PC(O-34:1)	-0.027852	-0.0936445	0.0379406	0.406968	0.787113
251	PC(O-34:2)	0.0340737	-0.0279385	0.0960858	0.281861	0.67739
252	PC(O-34:4)	0.0120817	-0.0473385	0.071502	0.690365	0.915425
253	PC(O-35:4)	0.0246315	-0.0232943	0.0725572	0.314109	0.697878
254	PC(O-36:0)	0.0142876	-0.0500669	0.0786421	0.663586	0.914302
255	PC(O-36:5)	0.0112278	-0.0377636	0.0602192	0.653428	0.912311
256	PC(O-38:5)	0.0158783	-0.0468398	0.0785965	0.619896	0.889205
257	PC(O-40:5)	-0.00441208	-0.058229	0.0494048	0.872385	0.971821
258	PC(O-40:7) (a)	0.0227615	-0.0409974	0.0865205	0.484337	0.837413
259	PC(O-40:7) (b)	0.017072	-0.0465064	0.0806503	0.598844	0.883815
260	PC(P-15:0/20:4) (a)	0.0399295	-0.00990633	0.0897654	0.116764	0.462636
261	PC(P-15:0/20:4) (b)	0.0682336	0.00596407	0.130503	0.0320692	0.251753
262	PC(P-16:0/14:0)	0.0131474	-0.0502507	0.0765456	0.684524	0.915425
263	PC(P-16:0/16:0)	0.0143682	-0.0486014	0.0773377	0.654846	0.912552
264	PC(P-16:0/16:1)	0.00819545	-0.0510869	0.0674778	0.786501	0.951895
265	PC(P-16:0/18:0)	-0.0329231	-0.0879351	0.0220889	0.241183	0.648361
266	PC(P-16:0/18:1)	-0.0168267	-0.0803279	0.0466745	0.603666	0.883815
267	PC(P-16:0/18:2)	0.0309137	-0.0336919	0.0955193	0.348633	0.723932
268	PC(P-16:0/18:3)	0.0694622	0.00629715	0.132627	0.0314618	0.251753
269	PC(P-16:0/20:4)	0.00850118	-0.0511647	0.0681671	0.780125	0.951895
270	PC(P-16:0/20:5)	0.000367788	-0.0515067	0.0522422	0.988917	0.998229
271	PC(P-16:0/22:6)	0.0188774	-0.0406347	0.0783895	0.534325	0.846012
272	PC(P-17:0/20:4) (a)	-0.000804897	-0.0416383	0.0400285	0.969192	0.997778
273	PC(P-17:0/20:4) (b)	-0.0239823	-0.0686421	0.0206775	0.292914	0.685962
274	PC(P-18:0/18:2)	-0.0385092	-0.0987025	0.0216841	0.210276	0.611006
275	PC(P-18:0/20:4)	-0.0325862	-0.0815674	0.0163951	0.192669	0.578798
276	PC(P-18:0/22:5)	-0.0239472	-0.0727865	0.0248922	0.336857	0.712239
277	PC(P-18:0/22:6)	-0.0294097	-0.0804508	0.0216314	0.259129	0.660556
278	PC(P-18:1/18:1)	-0.0381253	-0.0976773	0.0214267	0.209961	0.611006
279	PC(P-18:1/22:6)	-0.00794154	-0.0659735	0.0500904	0.788606	0.951895
280	PC(P-20:0/20:4)	-0.0404397	-0.0973524	0.016473	0.164144	0.525404
281	PC(P-35:2)(a)	0.00604972	-0.0454095	0.0575089	0.817827	0.967915
282	PC(P-35:2)(b)	-0.0120952	-0.0680347	0.0438444	0.671847	0.914399
283	PC(P-36:3)	0.0128072	-0.0410814	0.0666957	0.64149	0.903799
284	PC(P-38:5) (a)	-0.015123	-0.0692639	0.0390178	0.584217	0.879325
285	PC(P-38:5) (b)	-0.00706876	-0.0572271	0.0430896	0.782458	0.951895
286	LPC(14:0) [sn1]	0.0877836	0.0227635	0.152804	0.00831828	0.115237
287	LPC(14:0) [sn2]	0.0915701	0.0264461	0.156694	0.00600068	0.0999659
288	LPC(15-MHDA) [sn1] [104_sn1]	0.0395435	-0.009219	0.0883059	0.1124	0.453333
289	LPC(15-MHDA) [sn1] / LPC(17:0) [sn2]	0.0513493	-0.000707867	0.103406	0.0535856	0.321953
290	LPC(15-MHDA) [sn2]	0.0441901	-0.00300434	0.0913845	0.0668847	0.361122
291	LPC(15:0) [sn1]	0.0911575	0.0333042	0.149011	0.00209049	0.0638472
292	LPC(15:0) [sn2]	0.0893497	0.0333396	0.14536	0.00183916	0.0586134
293	LPC(16:0) [sn1]	0.0989011	0.0334013	0.164401	0.00318273	0.0777647
294	LPC(16:0) [sn2]	0.104499	0.0390343	0.169963	0.00182681	0.0586134
295	LPC(16:1) [sn1]	0.105878	0.0449115	0.166845	0.000701288	0.0307572
296	LPC(16:1) [sn2]	0.120121	0.0587095	0.181532	0.000137254	0.0111785
297	LPC(17:0) [sn1]	0.0547826	-0.00367622	0.113241	0.0666603	0.361122
298	LPC(17:1) (a) [sn1] [104_sn1]	0.0478606	-0.00633831	0.102059	0.0839188	0.408862
299	LPC(17:1) [sn1] (a) / LPC(17:1) [sn2] (b)	0.0506101	-0.00228503	0.103505	0.0611525	0.355752
300	LPC(17:1) [sn1] (b)	0.0331746	-0.0110671	0.0774163	0.14208	0.501824
301	LPC(17:1) [sn2] (a)	0.044678	-0.00863094	0.0979869	0.100889	0.440964
302	LPC(18:0) [sn1]	0.0847169	0.0197572	0.149676	0.0107889	0.131805
303	LPC(18:0) [sn2]	0.0903166	0.0254602	0.155173	0.00649974	0.103572
304	LPC(18:1) [sn1]	0.0437478	-0.0216808	0.109176	0.190437	0.576452
305	LPC(18:1) [sn2]	0.0561642	-0.00946756	0.121796	0.0939254	0.43602
306	LPC(18:2) [sn1]	0.0274456	-0.0381534	0.0930446	0.412469	0.787113
307	LPC(18:2) [sn2]	0.0217902	-0.0441504	0.0877307	0.517395	0.844142
308	LPC(18:3) (a) [sn1] [104_sn1]	0.0854626	0.0222562	0.148669	0.00822243	0.115237
309	LPC(18:3) [sn1] (a)/LPC(18:3) [sn2] (b)	0.0922603	0.0290306	0.15549	0.0043607	0.0940116
310	LPC(18:3) [sn1] (b)	0.11067	0.0470358	0.174304	0.000688985	0.0307572
311	LPC(18:3) [sn2] (a)	0.0907435	0.0272097	0.154277	0.00525685	0.0993498
312	LPC(19:0) (a) [sn1] [104_sn1]	0.0285727	-0.0230249	0.0801703	0.278121	0.676143
313	LPC(19:0) [sn1] (a) / LPC(19:0) [sn2] (b)	0.0463357	-0.0153614	0.108033	0.141459	0.501824
314	LPC(19:0) [sn1] (b)	0.0540601	-0.0102212	0.118341	0.0997189	0.440964
315	LPC(19:0) [sn2] (a)	0.0290774	-0.0209793	0.0791341	0.255273	0.660556
316	LPC(19:1) (a)	0.0316217	-0.0246709	0.0879144	0.271262	0.674933
317	LPC(19:1) (b)	0.0256723	-0.0272665	0.078611	0.342184	0.716631
318	LPC(19:1) (c)	0.00102189	-0.0484574	0.0505012	0.967722	0.997666
319	LPC(20:0) [sn1]	0.0509173	-0.0114702	0.113305	0.110117	0.453333
320	LPC(20:0) [sn2]	0.0461716	-0.0176271	0.10997	0.156488	0.518125
321	LPC(20:1) [sn1]	0.0402128	-0.0247029	0.105129	0.225091	0.626498
322	LPC(20:1) [sn2]	0.041912	-0.0232	0.107024	0.207489	0.610802
323	LPC(20:2) [sn1]	0.0771207	0.0111682	0.143073	0.0221996	0.214109
324	LPC(20:2) [sn2]	0.0839829	0.0178255	0.15014	0.013068	0.142968
325	LPC(20:3) [sn1]	0.0797872	0.0197153	0.139859	0.00942455	0.117088
326	LPC(20:3) [sn2]	0.0653159	0.00466367	0.125968	0.0351421	0.257591
327	LPC(20:4) [sn1]	0.0639088	0.00346867	0.124349	0.0385761	0.269298
328	LPC(20:4) [sn2]	0.0628528	0.00317929	0.122526	0.0393355	0.272009
329	LPC(20:5) [sn1]	0.0404866	-0.0154237	0.0963968	0.156244	0.518125
330	LPC(20:5) [sn2]	0.0345434	-0.0212772	0.0903639	0.225565	0.626498
331	LPC(22:0) [sn1]	0.0328381	-0.0220662	0.0877423	0.241477	0.648361
332	LPC(22:0) [sn2]	0.040113	-0.0148214	0.0950474	0.152811	0.518125
333	LPC(22:1) [sn1]	0.00982912	-0.0528969	0.0725551	0.758833	0.94596
334	LPC(22:1) [sn2]	-0.000597837	-0.0639783	0.0627826	0.985255	0.998229
335	LPC(22:4) [sn1]	0.0956678	0.0313062	0.160029	0.00368648	0.0844434
336	LPC(22:4) [sn2]	0.0956618	0.0310133	0.16031	0.00384238	0.0853475
337	LPC(22:5) (n3) [sn1] [104_sn1]	0.0290991	-0.0243714	0.0825696	0.286489	0.68012
338	LPC(22:5) [sn1] (n3)/LPC(22:5) [sn2] (n6)	0.0301871	-0.0245074	0.0848816	0.279719	0.676143
339	LPC(22:5) [sn1] (n6)	0.0543774	-0.0105228	0.119278	0.100984	0.440964
340	LPC(22:5) [sn2] (n3)	0.0216131	-0.0318975	0.0751238	0.428826	0.790933
341	LPC(22:6) [sn1]	0.0306538	-0.0296045	0.0909121	0.319069	0.698191
342	LPC(22:6) [sn2]	0.0344307	-0.0258106	0.0946721	0.26299	0.660556
343	LPC(24:0) [sn1]	0.0391143	-0.0152384	0.0934671	0.158827	0.518125
344	LPC(24:0) [sn2]	0.0282232	-0.0280863	0.0845327	0.326241	0.701275
345	LPC(26:0) [sn1]	0.0251114	-0.0404071	0.09063	0.45277	0.805535
346	LPC(26:0) [sn2]	-0.0123014	-0.0778875	0.0532848	0.713266	0.926993
347	LPC(O-16:0)	0.128057	0.0632127	0.192902	0.000118406	0.0111785
348	LPC(O-18:0)	0.0662947	0.00815418	0.124435	0.025731	0.227841
349	LPC(O-18:1)	0.104017	0.0388307	0.169204	0.00183384	0.0586134
350	LPC(O-20:0)	0.084023	0.0247831	0.143263	0.00557852	0.0993498
351	LPC(O-20:1)	0.0902201	0.026312	0.154128	0.00580349	0.0993498
352	LPC(O-22:0)	0.0870361	0.0249629	0.149109	0.00614222	0.10005
353	LPC(O-22:1)	0.0910628	0.0272478	0.154878	0.00529768	0.0993498
354	LPC(O-24:0)	0.0771951	0.0137036	0.140687	0.0174293	0.18251
355	LPC(O-24:1)	0.086307	0.0213454	0.151269	0.00940374	0.117088
356	LPC(O-24:2)	0.139336	0.0769095	0.201763	1.39591e-05	0.002558
357	LPC(P-16:0)	0.10989	0.0455807	0.1742	0.000852747	0.0344596
358	LPC(P-17:0) (a)	0.0428682	-0.00399308	0.0897295	0.0733952	0.376214
359	LPC(P-17:0) (b)	0.049829	-0.00182905	0.101487	0.0590793	0.349235
360	LPC(P-18:0)	0.0335834	-0.0223661	0.089533	0.239792	0.648361
361	LPC(P-18:1)	0.0786003	0.0147038	0.142497	0.0161572	0.174166
362	LPC(P-20:0)	0.0300516	-0.0286604	0.0887636	0.316092	0.697878
363	PE(15-MHDA_18:1)	-0.0183224	-0.0729353	0.0362904	0.511022	0.844142
364	PE(15-MHDA_18:2)	-0.0205916	-0.0772608	0.0360775	0.476574	0.833719
365	PE(15-MHDA_20:4)	-0.0144644	-0.0622714	0.0333427	0.553359	0.857183
366	PE(15-MHDA_22:6)	0.00613829	-0.0397968	0.0520734	0.793463	0.951895
367	PE(16:0_16:0)	-0.0127875	-0.0721903	0.0466154	0.673207	0.914399
368	PE(16:0_16:1)	-0.0336545	-0.0971239	0.0298149	0.299021	0.688616
369	PE(16:0_18:1)	-0.0181713	-0.0778266	0.041484	0.550679	0.857001
370	PE(16:0_18:2)	-0.0142466	-0.071428	0.0429348	0.625466	0.890226
371	PE(16:0_18:3) (a)	0.0382817	-0.0216796	0.0982431	0.211216	0.611006
372	PE(16:0_18:3) (b)	0.0555999	-0.00515259	0.116352	0.0732705	0.376214
373	PE(16:0_20:3)	-0.00327646	-0.0687228	0.0621699	0.921861	0.986732
374	PE(16:0_20:4)	-9.77874e-05	-0.0646654	0.0644698	0.997632	0.998229
375	PE(16:0_20:5)	-0.0216371	-0.0849608	0.0416867	0.503257	0.844142
376	PE(16:0_22:6)	0.0350421	-0.0290475	0.0991316	0.284231	0.68012
377	PE(16:1_18:2)	0.00258817	-0.0634181	0.0685945	0.938762	0.990414
378	PE(16:1_20:4)	0.0378369	-0.0273855	0.103059	0.255901	0.660556
379	PE(17:0_18:1)	-0.0170677	-0.0824951	0.0483597	0.609301	0.885528
380	PE(17:0_18:2)	-0.0259438	-0.091179	0.0392914	0.435951	0.790971
381	PE(17:0_20:4)	-0.00436836	-0.0649155	0.0561788	0.887585	0.973952
382	PE(17:0_22:6)	0.00523046	-0.0509954	0.0614564	0.855375	0.969767
383	PE(18:0_18:1)	-0.0240287	-0.0844177	0.0363604	0.435718	0.790971
384	PE(18:0_18:2)	-0.0163049	-0.0786552	0.0460453	0.608423	0.885528
385	PE(18:0_20:3) (a)	0.013575	-0.0513392	0.0784893	0.682016	0.915425
386	PE(18:0_20:3) (b)	0.00991498	-0.0460923	0.0659222	0.728708	0.932187
387	PE(18:0_20:4)	0.0117869	-0.0534527	0.0770266	0.723356	0.931246
388	PE(18:0_22:4)	0.0216801	-0.0404656	0.0838258	0.494345	0.844142
389	PE(18:0_22:5) (n3)	-0.00344999	-0.057829	0.050929	0.901074	0.979951
390	PE(18:0_22:5) (n6)	0.0173543	-0.0468859	0.0815945	0.59663	0.883815
391	PE(18:0_22:6)	0.0245166	-0.0370389	0.0860721	0.435273	0.790971
392	PE(18:1_18:1)	-0.0458804	-0.10258	0.0108192	0.113179	0.453333
393	PE(18:1_18:2)	-0.0422345	-0.100406	0.0159365	0.155159	0.518125
394	PE(18:1_22:6) (a)	-0.0565732	-0.122456	0.00930924	0.0927994	0.43602
395	PE(18:1_22:6) (b)	-0.0109702	-0.0644776	0.0425372	0.687919	0.915425
396	PE(20:0_20:4)	0.0131773	-0.0500323	0.0763868	0.682955	0.915425
397	PE(36:0)	0.0356327	-0.0283203	0.0995856	0.275176	0.676143
398	PE(38:5) (a)	-0.0315428	-0.0961823	0.0330968	0.339172	0.712358
399	PE(38:5) (b)	0.000957527	-0.0618244	0.0637394	0.976161	0.998229
400	PE(O-16:0/18:2)	0.06477	0.00202728	0.127513	0.0434087	0.286654
401	PE(O-16:0/20:3)	0.0361813	-0.0113824	0.0837451	0.136412	0.497462
402	PE(O-16:0/20:4)	0.0486032	-0.00739464	0.104601	0.089342	0.425245
403	PE(O-16:0/22:4)	0.0524335	-0.00686118	0.111728	0.0834885	0.408862
404	PE(O-16:0/22:6)	0.0229399	-0.0322554	0.0781352	0.41557	0.787113
405	PE(O-18:0/20:4)	0.0312419	-0.0129356	0.0754193	0.166148	0.529506
406	PE(O-18:0/22:5)	0.0128834	-0.0242561	0.0500229	0.496781	0.844142
407	PE(O-18:0/22:6)	0.0134265	-0.0290113	0.0558644	0.535384	0.846012
408	PE(O-18:1/18:2)	0.0460471	-0.0135743	0.105669	0.130527	0.488143
409	PE(O-18:1/22:6)	0.0094647	-0.0433346	0.062264	0.725432	0.931246
410	PE(O-34:1)	0.0174227	-0.0376669	0.0725123	0.535539	0.846012
411	PE(O-36:5)	0.0198489	-0.0311036	0.0708014	0.445397	0.800187
412	PE(O-38:5) (a)	0.0253333	-0.0181225	0.0687891	0.253579	0.660556
413	PE(O-38:5) (b)	0.0181076	-0.026549	0.0627642	0.42702	0.790933
414	PE(P-15:0/20:4) (a)	0.0443731	-0.00670086	0.0954471	0.0890284	0.425245
415	PE(P-15:0/20:4) (b)	0.0689759	0.00423344	0.133718	0.0371345	0.264268
416	PE(P-15:0/22:6) (a)	0.0394447	-0.0087573	0.0876466	0.109173	0.452113
417	PE(P-15:0/22:6) (b)	0.0554156	-0.00540217	0.116233	0.0745365	0.379411
418	PE(P-16:0/18:1)	0.0314646	-0.0329396	0.0958688	0.338609	0.712358
419	PE(P-16:0/18:2)	0.0459631	-0.0153828	0.107309	0.1424	0.501824
420	PE(P-16:0/18:3)	0.0542129	-0.00921301	0.117639	0.0943107	0.43602
421	PE(P-16:0/20:3) (a)	0.0167028	-0.0367909	0.0701965	0.540739	0.851291
422	PE(P-16:0/20:3) (b)	0.0290153	-0.0217672	0.0797978	0.263141	0.660556
423	PE(P-16:0/20:4)	0.0211732	-0.0340156	0.076362	0.452325	0.805535
424	PE(P-16:0/20:5)	-0.00968094	-0.05708	0.0377182	0.689042	0.915425
425	PE(P-16:0/22:4)	0.0742828	0.00907681	0.139489	0.0258668	0.227841
426	PE(P-16:0/22:5) (n3)	-0.0114127	-0.056104	0.0332787	0.616864	0.887183
427	PE(P-16:0/22:5) (n6)	0.015757	-0.0481262	0.0796401	0.628931	0.892907
428	PE(P-16:0/22:6)	0.0103849	-0.0474692	0.0682389	0.725075	0.931246
429	PE(P-17:0/20:4) (a)	0.0136113	-0.0260633	0.0532859	0.50153	0.844142
430	PE(P-17:0/20:4) (b)	-0.000481569	-0.0421523	0.0411892	0.981935	0.998229
431	PE(P-17:0/22:6) (a)	0.0122037	-0.0288934	0.0533007	0.560737	0.85808
432	PE(P-17:0/22:6) (b)	-0.00372678	-0.0488307	0.0413772	0.871392	0.971821
433	PE(P-18:0/18:1)	-0.015635	-0.0694655	0.0381954	0.569343	0.864034
434	PE(P-18:0/18:2)	-0.0016885	-0.0600594	0.0566824	0.954802	0.99323
435	PE(P-18:0/18:3)	0.0429404	-0.016581	0.102462	0.157795	0.518125
436	PE(P-18:0/20:3) (a)	-0.0183817	-0.0669611	0.0301978	0.458553	0.809925
437	PE(P-18:0/20:3) (b)	-0.014137	-0.0576549	0.0293809	0.524513	0.844142
438	PE(P-18:0/20:4)	-0.00577793	-0.0485139	0.036958	0.79109	0.951895
439	PE(P-18:0/20:5)	-0.0190634	-0.059713	0.0215861	0.358309	0.735687
440	PE(P-18:0/22:4)	0.0191976	-0.0432003	0.0815956	0.546684	0.854412
441	PE(P-18:0/22:5) (n3)	-0.0092036	-0.0466107	0.0282036	0.629786	0.892907
442	PE(P-18:0/22:5) (n6)	-0.0151441	-0.0671057	0.0368175	0.568016	0.863809
443	PE(P-18:0/22:6)	-0.0121589	-0.057781	0.0334632	0.601577	0.883815
444	PE(P-18:1/18:1)	-0.014997	-0.0699041	0.0399101	0.592579	0.883815
445	PE(P-18:1/18:1) (a)	-0.0195202	-0.0768361	0.0377957	0.504653	0.844142
446	PE(P-18:1/18:1) (b)	0.00423355	-0.0384877	0.0469548	0.846051	0.967915
447	PE(P-18:1/18:2) (a)	0.0206633	-0.0392062	0.0805329	0.498958	0.844142
448	PE(P-18:1/18:2) (b)	-0.000755316	-0.049119	0.0476083	0.975589	0.998229
449	PE(P-18:1/18:3)	0.0611334	-0.000397604	0.122664	0.0518836	0.319585
450	PE(P-18:1/20:3) (a)	-0.0113599	-0.0608193	0.0380994	0.652718	0.912311
451	PE(P-18:1/20:3) (b)	-0.00926817	-0.049574	0.0310377	0.652346	0.912311
452	PE(P-18:1/20:4) (a)	-0.0160824	-0.0655082	0.0333435	0.523838	0.844142
453	PE(P-18:1/20:4) (b)	-0.00656241	-0.0440802	0.0309554	0.731824	0.934073
454	PE(P-18:1/20:5) (a)	-0.0191189	-0.064643	0.0264051	0.410695	0.787113
455	PE(P-18:1/20:5) (b)	-0.0163232	-0.0563861	0.0237397	0.424796	0.790933
456	PE(P-18:1/22:4)	0.0251081	-0.0369567	0.087173	0.428091	0.790933
457	PE(P-18:1/22:5) (a)	-0.0123412	-0.0505201	0.0258377	0.526568	0.844142
458	PE(P-18:1/22:5) (b)	-0.0124383	-0.0673009	0.0424243	0.656912	0.912809
459	PE(P-18:1/22:6) (a)	-0.00588672	-0.0614483	0.0496748	0.835553	0.967915
460	PE(P-18:1/22:6) (b)	-0.00910642	-0.0495061	0.0312932	0.658766	0.912809
461	PE(P-19:0/20:4) (a)	-0.0223265	-0.0612505	0.0165975	0.261285	0.660556
462	PE(P-19:0/20:4) (b)	-0.0254648	-0.0744949	0.0235652	0.309034	0.695471
463	PE(P-20:0/18:1)	-0.0261627	-0.0874058	0.0350804	0.402702	0.785895
464	PE(P-20:0/18:2)	0.000275095	-0.0544878	0.055038	0.992147	0.998229
465	PE(P-20:0/20:4)	-0.0165546	-0.0780661	0.0449569	0.598012	0.883815
466	PE(P-20:0/22:6)	-0.0153227	-0.0753958	0.0447504	0.617276	0.887183
467	PE(P-20:1/20:4)	0.00784697	-0.0564322	0.0721261	0.810964	0.966564
468	PE(P-20:1/22:6)	-0.00488389	-0.0644057	0.054638	0.872279	0.971821
469	LPE(16:0) [sn1]	0.0404564	-0.0230979	0.104011	0.21256	0.611006
470	LPE(16:0) [sn2]	0.0440346	-0.0193218	0.107391	0.173543	0.536738
471	LPE(17:0) [sn1]	0.011981	-0.0528315	0.0767935	0.71722	0.928838
472	LPE(17:0) [sn2]	0.0258226	-0.0357771	0.0874223	0.411558	0.787113
473	LPE(18:0) [sn1]	0.0681575	0.00273863	0.133576	0.0415108	0.276613
474	LPE(18:0) [sn2]	0.077676	0.0127669	0.142585	0.019272	0.196199
475	LPE(18:1) [sn1]	-0.0242565	-0.0862024	0.0376895	0.443045	0.799365
476	LPE(18:1) [sn2]	-0.0264693	-0.0882641	0.0353256	0.401441	0.785895
477	LPE(18:2) [sn1]	-0.029366	-0.0943373	0.0356053	0.375974	0.751573
478	LPE(18:2) [sn2]	-0.0260216	-0.0905841	0.038541	0.429807	0.790933
479	LPE(20:4) [sn1]	-0.013488	-0.0762325	0.0492566	0.673637	0.914399
480	LPE(20:4) [sn2]	-0.0161831	-0.0790523	0.046686	0.614049	0.886019
481	LPE(22:6) [sn1]	0.0180689	-0.0422375	0.0783753	0.557219	0.857183
482	LPE(22:6) [sn2]	0.00793174	-0.0514198	0.0672833	0.793447	0.951895
483	LPE(P-16:0)	0.109184	0.0443291	0.174039	0.00101565	0.0372238
484	LPE(P-18:0)	0.0639602	0.00497748	0.122943	0.0338934	0.254072
485	LPE(P-18:1)	0.0813247	0.0183548	0.144295	0.0115757	0.136902
486	LPE(P-20:0)	0.03708	-0.0265235	0.100683	0.253562	0.660556
487	PI (38:5) (b)	0.00826553	-0.0495673	0.0660984	0.779462	0.951895
488	PI(15-MHDA_20:4)\PI(17:0_20:4)	-0.00992484	-0.0684291	0.0485794	0.739609	0.937589
489	PI(16:0_16:1)	0.0648106	0.00619332	0.123428	0.0305558	0.251753
490	PI(16:0_20:3) (a)	0.0166445	-0.0477353	0.0810242	0.6125	0.885528
491	PI(16:0_20:3) (b)	0.0210789	-0.040419	0.0825769	0.501923	0.844142
492	PI(16:0_20:4)	0.026747	-0.0387439	0.0922379	0.423698	0.790933
493	PI(16:0/16:0)	0.0823845	0.021401	0.143368	0.00827874	0.115237
494	PI(17:0_18:1)	0.0204598	-0.0368712	0.0777908	0.484486	0.837413
495	PI(17:0_18:2)	0.0142143	-0.0501363	0.0785649	0.665187	0.914399
496	PI(18:0_18:1)	-0.0103041	-0.0738181	0.0532099	0.750594	0.943714
497	PI(18:0_20:2)	0.00518975	-0.0594676	0.0698471	0.875037	0.971821
498	PI(18:0_20:3) (a)	0.012834	-0.0518465	0.0775146	0.69746	0.917682
499	PI(18:0_20:3) (b)	-0.00515536	-0.0561977	0.045887	0.84313	0.967915
500	PI(18:0_20:4)	-0.0142954	-0.0796004	0.0510096	0.668017	0.914399
501	PI(18:0_22:4)	-0.0100432	-0.0667603	0.0466738	0.728641	0.932187
502	PI(18:0_22:5) (n3)	-0.0370187	-0.0843947	0.0103572	0.126084	0.481351
503	PI(18:0_22:5) (n6)	-0.0334853	-0.0976614	0.0306909	0.306807	0.695471
504	PI(18:0_22:6)	-0.0125877	-0.0738873	0.0487119	0.687451	0.915425
505	PI(18:1_18:2)	-0.0177739	-0.068184	0.0326363	0.489746	0.842685
506	PI(20:0_20:4)	0.0104499	-0.0426549	0.0635548	0.699842	0.917682
507	PI(34:0)	0.056737	-0.00327455	0.116749	0.0642844	0.359698
508	PI(34:1)	-0.00636455	-0.0701355	0.0574064	0.844967	0.967915
509	PI(36:2)	0.0059262	-0.0472121	0.0590645	0.827034	0.967915
510	PI(37:6)	0.0122641	-0.0486253	0.0731535	0.693126	0.915425
511	PI(38:5) (a)	-0.03435	-0.0989124	0.0302125	0.29739	0.687656
512	PI(38:6)	-0.00483145	-0.0695447	0.0598818	0.8837	0.97308
513	PI(39:6)	-0.00866791	-0.0651492	0.0478134	0.76366	0.947146
514	PIP1(38:4)	0.0586718	-0.00608726	0.123431	0.0761949	0.385179
515	LPI(18:0) [sn1]	0.0113351	-0.054021	0.0766912	0.734005	0.934073
516	LPI(18:0) [sn2]	0.0155776	-0.0503677	0.0815229	0.64351	0.903799
517	LPI(18:1) [sn1]	-0.0147319	-0.0809229	0.0514591	0.662801	0.914302
518	LPI(18:1) [sn2]	0.0197725	-0.0462504	0.0857953	0.557402	0.857183
519	LPI(18:2) [sn1]	0.0285606	-0.0321131	0.0892343	0.356515	0.73406
520	LPI(18:2) [sn2]	0.0172976	-0.0425186	0.0771139	0.571032	0.864807
521	LPI(20:4) [sn1]	0.0110417	-0.0534045	0.0754879	0.737111	0.936399
522	LPI(20:4) [sn2]	0.00893266	-0.0555399	0.0734052	0.78604	0.951895
523	PS(36:1)	0.0517899	-0.0130431	0.116623	0.117862	0.46283
524	PS(36:2)	0.087128	0.0229189	0.151337	0.00799747	0.115237
525	PS(38:3)	0.0757626	0.0103459	0.141179	0.0235038	0.223744
526	PS(38:4)	0.0614503	-0.00420611	0.127107	0.0670021	0.361122
527	PS(38:5)	0.071436	0.00590294	0.136969	0.0329717	0.251753
528	PS(40:5)	0.0781002	0.0130038	0.143197	0.0189652	0.195795
529	PS(40:6)	0.0978017	0.0326221	0.162981	0.00337694	0.0798483
530	PG(34:1)	-0.00889986	-0.0738082	0.0560085	0.788204	0.951895
531	PG(36:1)	0.00631243	-0.0564512	0.0690761	0.843784	0.967915
532	PG(36:2)	0.00658925	-0.0569936	0.0701721	0.839099	0.967915
533	CE(14:0)	0.0635421	0.000130453	0.126954	0.0499112	0.310772
534	CE(15:0)	0.0528064	-0.00583008	0.111443	0.0779677	0.391441
535	CE(16:0)	0.0332816	-0.0225121	0.0890754	0.242726	0.649335
536	CE(16:1)	0.0757696	0.0193656	0.132174	0.0086467	0.115237
537	CE(16:2)	0.0708456	0.00600386	0.135687	0.0325707	0.251753
538	CE(17:0)	-0.000914475	-0.0442713	0.0424424	0.967036	0.997666
539	CE(17:1)	0.0368505	-0.0181044	0.0918054	0.189166	0.575347
540	CE(18:0)	0.00424093	-0.0515605	0.0600423	0.881626	0.97308
541	CE(18:1)	-0.00400085	-0.0691807	0.061179	0.904273	0.981827
542	CE(18:2)	0.0471413	-0.0152296	0.109512	0.138935	0.501672
543	CE(18:3)	0.105305	0.0434373	0.167172	0.000893224	0.0344596
544	CE(20:0)	-0.0103068	-0.0718665	0.051253	0.742888	0.937589
545	CE(20:1)	-0.0385227	-0.103378	0.0263331	0.244734	0.649963
546	CE(20:2)	0.0302823	-0.0353411	0.0959057	0.366058	0.742955
547	CE(20:3)	0.0623989	-0.00275574	0.127554	0.0609089	0.355752
548	CE(20:4)	0.0440179	-0.0193062	0.107342	0.173487	0.536738
549	CE(20:5)	0.0240356	-0.0348523	0.0829235	0.423981	0.790933
550	CE(22:0)	0.0134499	-0.0517104	0.0786102	0.685915	0.915425
551	CE(22:1)	-0.0303813	-0.0944136	0.0336511	0.352706	0.729272
552	CE(22:4)	0.0573096	-0.00765428	0.122273	0.0842266	0.408862
553	CE(22:5) (n3)	0.0335425	-0.0293402	0.0964252	0.296147	0.687656
554	CE(22:5) (n6)	0.0490056	-0.0146851	0.112696	0.131972	0.488564
555	CE(22:6)	0.034619	-0.028197	0.097435	0.28042	0.676143
556	CE(24:0)	-0.0029853	-0.0672476	0.061277	0.927477	0.98814
557	CE(24:1)	-0.0130192	-0.0784315	0.0523931	0.696575	0.917682
558	CE(24:4)	0.0330207	-0.0326183	0.0986598	0.324461	0.701275
559	CE(24:5)	0.021937	-0.0426199	0.0864938	0.505609	0.844142
560	CE(24:6)	0.0548213	-0.0109612	0.120604	0.102821	0.440964
561	COH	0.00286868	-0.0575418	0.0632792	0.925871	0.987866
562	DE(16:0)	0.0439915	-0.021012	0.108995	0.185114	0.570121
563	DE(18:1)	0.00620572	-0.0580951	0.0705065	0.85002	0.967915
564	DE(18:2)	0.0388358	-0.0270567	0.104728	0.248397	0.654946
565	DE(20:4)	0.0403353	-0.0214565	0.102127	0.201164	0.594571
566	DE(20:5)	0.0312898	-0.0252507	0.0878304	0.27843	0.676143
567	DE(22:6)	0.00636142	-0.0501739	0.0628968	0.825512	0.967915
568	FA(14:0)	-0.0442983	-0.10784	0.0192433	0.172234	0.536738
569	FA(15:0)	-0.00195648	-0.0652863	0.0613734	0.951733	0.99323
570	FA(16:0)	-0.0423655	-0.106999	0.0222676	0.199299	0.594571
571	FA(16:1)	-0.0262897	-0.0842896	0.0317102	0.374616	0.751573
572	FA(16:2)	0.0410406	-0.0237643	0.105845	0.214915	0.615363
573	FA(17:0)	-0.0425405	-0.0986432	0.0135621	0.137666	0.499551
574	FA(17:1)	-0.0338935	-0.0898938	0.0221067	0.235908	0.645227
575	FA(18:0)	-0.0777967	-0.138328	-0.0172656	0.0119827	0.137239
576	FA(18:1)	-0.0604163	-0.125978	0.005145	0.0713072	0.370696
577	FA(18:2)	-0.0230447	-0.0873014	0.041212	0.48233	0.837413
578	FA(18:3)	0.00484528	-0.060074	0.0697646	0.883737	0.97308
579	FA(20:2)	-0.0510968	-0.113833	0.0116395	0.110848	0.453333
580	FA(20:3)	-0.0352838	-0.0923672	0.0217995	0.226103	0.626498
581	FA(20:4)	-0.0157305	-0.0749646	0.0435035	0.602869	0.883815
582	FA(20:5)	-0.0211852	-0.0806923	0.0383219	0.48554	0.837413
583	FA(22:4)	-0.0463256	-0.106295	0.0136438	0.130446	0.488143
584	FA(22:5)	-0.0525052	-0.108039	0.0030289	0.0642777	0.359698
585	FA(22:6)	-0.0328899	-0.0933537	0.0275739	0.286708	0.68012
586	AC(12:0)	-0.0867883	-0.148088	-0.0254883	0.00566422	0.0993498
587	AC(13:0)	-0.0503315	-0.110447	0.00978446	0.101237	0.440964
588	AC(14:0)	-0.0222072	-0.0806684	0.0362541	0.4568	0.808779
589	AC(14:1)	-0.111604	-0.171603	-0.0516041	0.000285835	0.019047
590	AC(14:2)	-0.0609968	-0.12541	0.00341611	0.063855	0.359698
591	AC(15:0) (a)	0.00468167	-0.0381433	0.0475066	0.830398	0.967915
592	AC(15:0) (b)	0.0129963	-0.0346642	0.0606568	0.593187	0.883815
593	AC(16:0)	0.0430151	-0.0184818	0.104512	0.170816	0.536738
594	AC(16:1)	-0.00352532	-0.0616935	0.0546429	0.905477	0.981827
595	AC(17:0) (a)	0.00430994	-0.0387752	0.0473951	0.844615	0.967915
596	AC(17:0) (b)	0.00322213	-0.0433147	0.0497589	0.892091	0.975974
597	AC(18:0)	0.0178797	-0.0362073	0.0719666	0.517242	0.844142
598	AC(18:1)	0.0409479	-0.0252046	0.1071	0.225442	0.626498
599	AC(18:2)	0.0677462	0.00374001	0.131752	0.0383856	0.269298
600	DG(14:0_16:0)	-0.0271892	-0.0877732	0.0333948	0.379359	0.755626
601	DG(14:0_18:2)	-0.0076114	-0.0735215	0.0582987	0.820998	0.967915
602	DG(16:0_16:0)	0.0149529	-0.046465	0.0763708	0.633376	0.894536
603	DG(16:0_16:1)	0.0123201	-0.0446024	0.0692426	0.671535	0.914399
604	DG(16:0_18:1)	0.02084	-0.0430171	0.0846971	0.522602	0.844142
605	DG(16:0_18:2)	0.0494039	-0.0162299	0.115038	0.140561	0.501824
606	DG(16:0_20:4)	-0.00364361	-0.057268	0.0499808	0.894092	0.976478
607	DG(16:0_22:5)	0.0149442	-0.0377703	0.0676588	0.578625	0.8727
608	DG(16:0_22:6)	0.0241165	-0.0337952	0.0820281	0.414648	0.787113
609	DG(16:1_18:1)	0.0247269	-0.0350299	0.0844836	0.417616	0.788949
610	DG(18:0_18:1)	0.00169809	-0.0630995	0.0664956	0.95905	0.994319
611	DG(18:0_18:2)	0.0244431	-0.0412466	0.0901329	0.466046	0.821182
612	DG(18:0_20:4)	0.0653658	0.00275477	0.127977	0.0410964	0.276364
613	DG(18:0_22:6)	0.0372994	-0.0274548	0.102054	0.259279	0.660556
614	DG(18:1_18:1)	0.00342218	-0.0617385	0.0685829	0.918041	0.985248
615	DG(18:1_18:2)	0.0192344	-0.0409357	0.0794045	0.531155	0.846012
616	DG(18:1_18:3)	0.0442262	-0.0146238	0.103076	0.141201	0.501824
617	DG(18:1_20:3)	0.0264844	-0.036222	0.0891909	0.408049	0.787113
618	DG(18:1_20:4)	0.00543089	-0.0603993	0.0712611	0.87159	0.971821
619	DG(18:1_20:5)	-0.0195274	-0.0835916	0.0445368	0.55041	0.857001
620	DG(18:1_22:5)	0.0114932	-0.0483478	0.0713343	0.706698	0.921726
621	DG(18:1_22:6)	0.006812	-0.0559686	0.0695926	0.831645	0.967915
622	DG(18:2_18:2)	0.0301325	-0.0278204	0.0880854	0.308499	0.695471
623	DG(18:2_20:4)	0.0282937	-0.0358736	0.092461	0.387746	0.770239
624	DG(18:2_22:6)	0.0213731	-0.043497	0.0862433	0.518633	0.844142
625	TG(48:0) [NL-16:0]	0.0263847	-0.0340389	0.0868084	0.392362	0.777301
626	TG(48:0) [NL-18:0]	-0.0169899	-0.0683034	0.0343237	0.516576	0.844142
627	TG(48:1) [NL-16:1]	0.037723	-0.00886957	0.0843156	0.112978	0.453333
628	TG(48:1) [NL-18:1]	-0.0257285	-0.0856862	0.0342293	0.400597	0.785895
629	TG(48:2) [NL-14:0]	-0.00110811	-0.062833	0.0606168	0.971941	0.998229
630	TG(48:2) [NL-14:1]	0.0205045	-0.0272557	0.0682648	0.400364	0.785895
631	TG(48:2) [NL-16:1]	0.0172342	-0.030128	0.0645965	0.475949	0.833719
632	TG(48:2) [NL-18:2]	0.00239366	-0.0619429	0.0667303	0.941888	0.990414
633	TG(48:3) [NL-14:0]	-0.0128429	-0.0761664	0.0504807	0.691106	0.915425
634	TG(48:3) [NL-16:1]	0.00073667	-0.0571622	0.0586355	0.980111	0.998229
635	TG(48:3) [NL-18:3]	0.00526035	-0.0594755	0.0699962	0.873503	0.971821
636	TG(49:1) [NL-16:1]	0.0248006	-0.0301074	0.0797085	0.376299	0.751573
637	TG(49:1) [NL-17:1]	-0.00206455	-0.0483044	0.0441753	0.930289	0.989698
638	TG(50:0) [NL-18:0]	0.00495566	-0.0474976	0.057409	0.853143	0.969541
639	TG(50:1) [NL-14:0]	-0.0150824	-0.0716541	0.0414892	0.601448	0.883815
640	TG(50:1) [NL-16:0]	0.0277715	-0.0319378	0.0874808	0.362275	0.737631
641	TG(50:1) [NL-18:1]	0.026409	-0.0284076	0.0812257	0.345349	0.71915
642	TG(50:2) [NL-14:0]	-0.0322773	-0.0965933	0.0320387	0.325625	0.701275
643	TG(50:2) [NL-16:1]	0.0443545	-0.00236617	0.0910752	0.0631895	0.359698
644	TG(50:2) [NL-18:1]	-0.0160749	-0.0780419	0.0458921	0.611298	0.885528
645	TG(50:2) [NL-18:2]	0.0527454	-0.00901421	0.114505	0.0945801	0.43602
646	TG(50:3) [NL-14:0]	0.000193013	-0.0614283	0.0618143	0.995103	0.998229
647	TG(50:3) [NL-14:1]	-0.000527615	-0.0587311	0.0576759	0.985829	0.998229
648	TG(50:3) [NL-16:1]	0.0526646	8.10517e-05	0.105248	0.0500288	0.310772
649	TG(50:3) [NL-18:2]	-0.00867829	-0.0741253	0.0567687	0.795018	0.952203
650	TG(50:3) [NL-18:3]	0.0522092	-0.00947537	0.113894	0.0975672	0.440964
651	TG(50:4) [NL-14:0]	0.00529224	-0.0562937	0.0668782	0.866294	0.971821
652	TG(50:4) [NL-18:3]	0.0174201	-0.047744	0.0825842	0.600467	0.883815
653	TG(50:4) [NL-20:4]	-0.023387	-0.0807017	0.0339277	0.424109	0.790933
654	TG(51:0) [NL-16:0]	-0.00071596	-0.0506053	0.0491734	0.977568	0.998229
655	TG(51:1) [NL-17:0]	-0.00456712	-0.0508939	0.0417596	0.846836	0.967915
656	TG(51:2) [NL-15:0]	-0.00196588	-0.0559538	0.0520221	0.943123	0.990414
657	TG(51:2) [NL-17:0]	0.00447436	-0.0400907	0.0490395	0.844051	0.967915
658	TG(51:2) [NL-17:1]	0.00440636	-0.0401452	0.0489579	0.846345	0.967915
659	TG(52:1) [NL-18:0]	-0.00597281	-0.0585988	0.0466532	0.824026	0.967915
660	TG(52:1) [NL-18:1]	-0.00249985	-0.0544912	0.0494915	0.924944	0.987866
661	TG(52:2) [NL-16:0]	-0.00567704	-0.0691051	0.0577511	0.860793	0.97071
662	TG(52:2) [NL-18:2]	0.020972	-0.033622	0.075566	0.451743	0.805535
663	TG(52:3) [NL-16:1]	-0.00829947	-0.0679502	0.0513512	0.785159	0.951895
664	TG(52:3) [NL-18:2]	0.0242871	-0.0373532	0.0859275	0.44021	0.796726
665	TG(52:4) [NL-16:1]	0.0315002	-0.0336287	0.096629	0.343462	0.717259
666	TG(52:4) [NL-18:2]	0.0502961	-0.00885785	0.10945	0.0960485	0.439483
667	TG(52:4) [NL-18:3]	0.0460632	-0.0171304	0.109257	0.153528	0.518125
668	TG(52:5) [NL-18:3]	0.0455127	-0.015717	0.106742	0.145584	0.505748
669	TG(52:5) [NL-20:4]	-0.00310913	-0.0564025	0.0501842	0.908995	0.984186
670	TG(52:5) [NL-20:5]	0.00920278	-0.0384748	0.0568803	0.705303	0.921726
671	TG(53:2) [NL-17:1]	-0.0262546	-0.0736859	0.0211766	0.278321	0.676143
672	TG(53:2) [NL-18:1]	-0.0160787	-0.0652129	0.0330554	0.521471	0.844142
673	TG(54:0) [NL-18:0]	-6.24167e-05	-0.0551547	0.0550298	0.998229	0.998229
674	TG(54:1) [NL-18:1]	-0.00926579	-0.0695418	0.0510102	0.763276	0.947146
675	TG(54:2) [NL-18:0]	-0.0193986	-0.0840001	0.0452028	0.556346	0.857183
676	TG(54:2) [NL-20:1]	-0.0308555	-0.0937881	0.0320771	0.336887	0.712239
677	TG(54:3) [NL-18:1]	-0.0362163	-0.0927507	0.0203181	0.209673	0.611006
678	TG(54:3) [NL-18:2]	-0.00557811	-0.0694794	0.0583232	0.864198	0.971821
679	TG(54:4) [NL-18:2]	-0.0227286	-0.0781766	0.0327194	0.421997	0.790933
680	TG(54:4) [NL-20:3]	0.0358008	-0.0216476	0.0932493	0.222321	0.626498
681	TG(54:5) [NL-18:3]	0.0395253	-0.0172446	0.0962951	0.172798	0.536738
682	TG(54:5) [NL-20:4]	0.0370414	-0.0240537	0.0981365	0.235096	0.645227
683	TG(54:6) [NL-18:3]	0.0229972	-0.0308853	0.0768796	0.403133	0.785895
684	TG(54:6) [NL-20:4]	0.0470142	-0.0171118	0.11114	0.151158	0.518125
685	TG(54:6) [NL-20:5]	0.000507508	-0.0528497	0.0538648	0.985131	0.998229
686	TG(54:6) [NL-22:6]	0.00526947	-0.0471996	0.0577385	0.844006	0.967915
687	TG(54:7) [NL-20:5]	-0.00193422	-0.0643868	0.0605183	0.951612	0.99323
688	TG(54:7) [NL-22:6]	-0.00605694	-0.0641402	0.0520263	0.838107	0.967915
689	TG(56:6) [NL-20:4]	-0.00917944	-0.0745542	0.0561953	0.783235	0.951895
690	TG(56:6) [NL-22:5](a)	0.00866107	-0.0427219	0.0600441	0.741212	0.937589
691	TG(56:6) [NL-22:5](b)	0.00921201	-0.0421742	0.0605983	0.725414	0.931246
692	TG(56:7) [NL-20:4]	0.00614275	-0.0576657	0.0699512	0.850392	0.967915
693	TG(56:7) [NL-20:5]	-0.0282682	-0.0898698	0.0333334	0.36873	0.74457
694	TG(56:7) [NL-22:5](a)	0.0416505	-0.0159849	0.0992859	0.15709	0.518125
695	TG(56:7) [NL-22:5](b)	0.0419049	-0.0157435	0.0995534	0.154668	0.518125
696	TG(56:7) [NL-22:6]	0.00691427	-0.0496863	0.0635148	0.810839	0.966564
697	TG(56:8) [NL-20:4]	0.00758211	-0.0572092	0.0723734	0.81865	0.967915
698	TG(56:8) [NL-20:5]	-0.034107	-0.0998999	0.0316858	0.30994	0.695471
699	TG(56:8) [NL-22:6]	0.0170913	-0.0451018	0.0792844	0.59031	0.883815
700	TG(56:9) [NL-22:6]	0.0256521	-0.0383938	0.0896981	0.432693	0.790933
701	TG(58:10) [NL-22:6]	-0.00917109	-0.0749553	0.0566132	0.784742	0.951895
702	TG(58:8) [NL-22:6]	-0.0382514	-0.101164	0.0246616	0.233776	0.644204
703	TG(58:9) [NL-22:6]	-0.0225894	-0.0884058	0.0432269	0.501348	0.844142
704	TG(O-50:1) [NL-15:0]	-0.0155821	-0.0624198	0.0312557	0.514573	0.844142
705	TG(O-50:1) [NL-16:0]	0.00959501	-0.0378908	0.0570808	0.692194	0.915425
706	TG(O-50:1) [NL-17:1]	0.0259051	-0.024099	0.0759092	0.310258	0.695471
707	TG(O-50:1) [NL-18:1]	0.00220795	-0.0393145	0.0437304	0.917022	0.985248
708	TG(O-50:2) [NL-16:1]	0.00295265	-0.0505687	0.056474	0.913924	0.985248
709	TG(O-50:2) [NL-18:1]	-0.0192816	-0.0611407	0.0225776	0.366916	0.742955
710	TG(O-50:2) [NL-18:2]	0.0218457	-0.0354373	0.0791286	0.455022	0.807581
711	TG(O-50:3) [NL-18:2]	-0.0254719	-0.0801602	0.0292164	0.361601	0.737631
712	TG(O-52:0) [NL-16:0]	-0.0047446	-0.0526011	0.0431119	0.845981	0.967915
713	TG(O-52:1) [NL-16:0]	-0.00168868	-0.0435822	0.0402048	0.93705	0.990414
714	TG(O-52:1) [NL-18:1]	-0.006049	-0.0437538	0.0316558	0.753275	0.943847
715	TG(O-52:2) [NL-16:0]	0.00415074	-0.0406606	0.0489621	0.855988	0.969767
716	TG(O-52:2) [NL-17:1]	0.00128397	-0.0416981	0.0442661	0.953327	0.99323
717	TG(O-52:2) [NL-18:1]	-0.000221887	-0.0407167	0.0402729	0.991434	0.998229
718	TG(O-54:2) [NL-17:1]	-0.00743606	-0.0466505	0.0317783	0.71025	0.924713
719	TG(O-54:2) [NL-18:1]	-0.007203	-0.0446136	0.0302076	0.706005	0.921726
720	TG(O-54:3) [NL-17:1]	-0.00591894	-0.0495206	0.0376827	0.790261	0.951895
721	TG(O-54:3) [NL-18:1]	-0.0120982	-0.0525377	0.0283413	0.557812	0.857183
722	TG(O-54:4) [NL-17:1]	-0.0148726	-0.0710638	0.0413186	0.604081	0.883815
723	TG(O-54:4) [NL-18:2]	-0.00202855	-0.0544229	0.0503658	0.939532	0.990414
724	Ubiquinone	0.0696063	0.00429266	0.13492	0.0370752	0.264268
725	CE(18:2) [+OH]	0.0501916	-0.0147418	0.115125	0.130206	0.488143
726	CE(20:4) [+OH]	0.0122832	-0.0481174	0.0726837	0.690314	0.915425
727	CE(22:6) [+OH]	0.00336148	-0.060136	0.0668589	0.917389	0.985248
728	LPC(18:2) [+OH]	0.0357322	-0.0290376	0.100502	0.27993	0.676143
729	LPC(20:4) [+OH]	0.0273583	-0.0382209	0.0929375	0.413815	0.787113
730	LPC(22:6) [+OH]	0.0339137	-0.032067	0.0998944	0.314068	0.697878
731	PC(34:2) [+OH]	0.00196776	-0.0590484	0.0629839	0.949617	0.99323
732	PC(36:4) [+OH]	-0.0437886	-0.0980751	0.0104979	0.114323	0.455429
733	PC(38:6) [+OH]	-0.0266709	-0.0721346	0.0187927	0.2506	0.658386

## Sheet: Supp 5
Supp 5. Linear regression between infant 12-month lipidome and infant 12-month BMI z score
#	Lipid	Beta	LCI	UCI	p value	BH p value
1	Sph(d16:1)	-0.0289591	-0.0961143	0.0381961	0.398291	0.919557
2	Sph(d18:1)	-0.0298765	-0.0974931	0.0377401	0.386776	0.911808
3	Sph(d18:2)	0.0112791	-0.0567895	0.0793477	0.74545	0.985606
4	S1P(d16:1)	0.01753	-0.0472885	0.0823484	0.59623	0.975659
5	S1P(d18:0)	0.0140969	-0.0525607	0.0807544	0.678634	0.977557
6	S1P(d18:1)	-0.00991573	-0.0765769	0.0567455	0.770721	0.985606
7	S1P(d18:2)	0.0341167	-0.0309111	0.0991445	0.304165	0.909234
8	Cer(d18:0/16:0)	0.0216804	-0.0370885	0.0804493	0.469886	0.949441
9	Cer(d18:0/18:0)	0.0316291	-0.0323934	0.0956517	0.333234	0.909234
10	Cer(d18:0/20:0)	0.013708	-0.0482749	0.0756909	0.664809	0.977557
11	Cer(d18:0/22:0)	-0.0278373	-0.0906339	0.0349594	0.385231	0.911808
12	Cer(d18:0/24:0)	-0.0669374	-0.128362	-0.0055125	0.0330401	0.613413
13	Cer(d18:0/24:1)	-0.0094099	-0.0698784	0.0510586	0.760452	0.985606
14	Cer(d16:1/16:0)	0.0420728	-0.0187286	0.102874	0.17546	0.802312
15	Cer(d16:1/18:0)	0.0779013	0.0143135	0.141489	0.0166061	0.580146
16	Cer(d16:1/20:0)	0.0505621	-0.011073	0.112197	0.108321	0.802312
17	Cer(d16:1/22:0)	0.00333493	-0.0561875	0.0628573	0.912588	0.987429
18	Cer(d16:1/23:0)	-0.0126181	-0.0719334	0.0466972	0.676846	0.977557
19	Cer(d16:1/24:0)	-0.0239566	-0.0851152	0.037202	0.442895	0.932659
20	Cer(d16:1/24:1)	0.0194305	-0.0425857	0.0814467	0.539356	0.949441
21	Cer(d17:1/16:0)	0.0458796	-0.0196319	0.111391	0.17031	0.802312
22	Cer(d17:1/18:0)	0.0357053	-0.0294545	0.100865	0.283193	0.880983
23	Cer(d17:1/20:0)	0.0114181	-0.0525855	0.0754217	0.726701	0.985606
24	Cer(d17:1/22:0)	0.00503035	-0.0565228	0.0665835	0.872788	0.987429
25	Cer(d17:1/23:0)	-0.00856579	-0.0695906	0.052459	0.783309	0.985606
26	Cer(d17:1/24:0)	-0.0268165	-0.0876852	0.0340523	0.388162	0.911808
27	Cer(d17:1/24:1)	0.0200774	-0.042083	0.0822378	0.526899	0.949441
28	Cer(d18:1/14:0)	0.0751334	0.00944407	0.140823	0.0252931	0.58666
29	Cer(d18:1/16:0)	0.0050882	-0.0567872	0.0669636	0.872002	0.987429
30	Cer(d18:1/17:0)	0.0269767	-0.0419254	0.0958789	0.443117	0.932659
31	Cer(d18:1/18:0)	0.0752457	0.0125798	0.137912	0.0188802	0.580146
32	Cer(d18:1/19:0)	0.0100449	-0.0555328	0.0756226	0.764097	0.985606
33	Cer(d18:1/20:0)	0.0233324	-0.03634	0.0830047	0.443715	0.932659
34	Cer(d18:1/21:0)	0.0334863	-0.0269298	0.0939025	0.277703	0.880983
35	Cer(d18:1/22:0)	-0.00362473	-0.0620342	0.0547847	0.903226	0.987429
36	Cer(d18:1/23:0)	-0.0255227	-0.0823819	0.0313364	0.379276	0.911808
37	Cer(d18:1/24:0)	-0.0605292	-0.118223	-0.00283519	0.0401285	0.632197
38	Cer(d18:1/24:1)	0.000294391	-0.0586407	0.0592295	0.992191	0.997272
39	Cer(d18:1/26:0)	-0.0191366	-0.0799694	0.0416962	0.537722	0.949441
40	Cer(d18:2/14:0)	0.113011	0.0483092	0.177712	0.000655026	0.240067
41	Cer(d18:2/16:0)	0.0310402	-0.0317	0.0937804	0.33254	0.909234
42	Cer(d18:2/17:0)	-0.0131246	-0.0814898	0.0552407	0.706829	0.977557
43	Cer(d18:2/18:0)	0.0800177	0.0165463	0.143489	0.0137166	0.580146
44	Cer(d18:2/20:0)	0.0662262	0.00442084	0.128032	0.0360751	0.629597
45	Cer(d18:2/21:0)	-0.00220222	-0.0660588	0.0616543	0.946128	0.987429
46	Cer(d18:2/22:0)	0.01909	-0.0417166	0.0798966	0.538538	0.949441
47	Cer(d18:2/23:0)	0.0169999	-0.0424053	0.0764051	0.575054	0.968334
48	Cer(d18:2/24:0)	-0.00860346	-0.0687361	0.0515292	0.779235	0.985606
49	Cer(d18:2/24:1)	0.0277609	-0.0333685	0.0888902	0.373723	0.911808
50	Cer(d18:2/26:0)	-0.00756333	-0.0682001	0.0530734	0.806936	0.985606
51	Cer(d19:1/16:0)	0.0314637	-0.0330055	0.0959329	0.339124	0.909234
52	Cer(d19:1/18:0)	0.0805118	0.0147976	0.146226	0.0165988	0.580146
53	Cer(d19:1/20:0)	0.0450425	-0.0212504	0.111335	0.183395	0.802312
54	Cer(d19:1/22:0)	0.0328734	-0.031647	0.0973938	0.318326	0.909234
55	Cer(d19:1/23:0)	0.0192541	-0.0441239	0.082632	0.551743	0.957089
56	Cer(d19:1/24:0)	0.00963562	-0.0535393	0.0728106	0.765073	0.985606
57	Cer(d19:1/24:1)	0.0326334	-0.0325603	0.0978272	0.326889	0.909234
58	Cer(d19:1/26:0)	0.00889928	-0.0560421	0.0738406	0.788326	0.985606
59	Cer(d20:1/22:0)	-0.00783793	-0.068988	0.0533121	0.801716	0.985606
60	Cer(d20:1/23:0)	-0.0263829	-0.0868284	0.0340627	0.392579	0.911808
61	Cer(d20:1/24:0)	-0.0419813	-0.102356	0.0183931	0.173364	0.802312
62	Cer(d20:1/24:1)	0.00242607	-0.0576009	0.062453	0.936884	0.987429
63	Cer(d20:1/26:0)	0.0276176	-0.0393751	0.0946102	0.419367	0.932659
64	Cer(m18:0/20:0)	0.0341394	-0.0223338	0.0906126	0.23648	0.825725
65	Cer(m18:0/22:0)	0.0123677	-0.0433281	0.0680636	0.663529	0.977557
66	Cer(m18:0/23:0)	-0.00686164	-0.0641611	0.0504378	0.814503	0.986498
67	Cer(m18:0/24:0)	-0.00574363	-0.0644664	0.0529791	0.848029	0.986498
68	Cer(m18:0/24:1)	0.0253713	-0.0324415	0.0831841	0.390006	0.911808
69	Cer(m18:1/18:0)	0.0413309	-0.0167326	0.0993945	0.163414	0.802312
70	Cer(m18:1/20:0)	0.0194417	-0.0346601	0.0735434	0.481463	0.949441
71	Cer(m18:1/22:0)	-0.019563	-0.0767934	0.0376674	0.503093	0.949441
72	Cer(m18:1/23:0)	0.00892058	-0.0487039	0.0665451	0.761663	0.985606
73	Cer(m18:1/24:0)	-0.000796285	-0.0590913	0.0574987	0.978649	0.997272
74	Cer(m18:1/24:1)	0.00829893	-0.049205	0.0658028	0.777365	0.985606
75	Cer1P(d18:1/16:0)	-0.0224605	-0.0842547	0.0393337	0.476454	0.949441
76	HexCer(d16:1/18:0)	0.0263793	-0.0394078	0.0921665	0.432184	0.932659
77	HexCer(d16:1/20:0)	-0.000659093	-0.0663757	0.0650576	0.984322	0.997272
78	HexCer(d16:1/22:0)	-0.0194001	-0.0847669	0.0459668	0.560957	0.957089
79	HexCer(d16:1/24:0)	-0.0243328	-0.0907639	0.0420983	0.47305	0.949441
80	HexCer(d18:1/16:0)	0.0241838	-0.034478	0.0828456	0.419355	0.932659
81	HexCer(d18:1/18:0)	0.000735173	-0.059065	0.0605353	0.980783	0.997272
82	HexCer(d18:1/20:0)	-0.00962449	-0.0694292	0.0501802	0.752533	0.985606
83	HexCer(d18:1/22:0)	-0.0221986	-0.0855904	0.0411931	0.49272	0.949441
84	HexCer(d18:1/24:0)	-0.042491	-0.105617	0.0206346	0.187504	0.802312
85	HexCer(d18:1/24:1)	0.00925906	-0.0534067	0.0719248	0.772213	0.985606
86	HexCer(d18:2/18:0)	0.0387614	-0.0220501	0.099573	0.211977	0.802312
87	HexCer(d18:2/20:0)	0.00386354	-0.0600074	0.0677345	0.905659	0.987429
88	HexCer(d18:2/22:0)	0.00397743	-0.0589777	0.0669326	0.901486	0.987429
89	HexCer(d18:2/24:0)	-0.00651905	-0.0701109	0.0570728	0.840815	0.986498
90	Hex2Cer(d16:1/16:0)	-0.00474627	-0.0702263	0.0607337	0.887067	0.987429
91	Hex2Cer(d16:1/24:1)	-0.001667	-0.0692271	0.0658931	0.961442	0.991191
92	Hex2Cer(d18:1/16:0)	-0.00287888	-0.06759	0.0618322	0.930541	0.987429
93	Hex2Cer(d18:1/18:0)	-0.0228123	-0.0911106	0.045486	0.512907	0.949441
94	Hex2Cer(d18:1/20:0)	0.0261105	-0.039568	0.091789	0.436131	0.932659
95	Hex2Cer(d18:1/22:0)	-0.0181563	-0.0856064	0.0492939	0.597952	0.975659
96	Hex2Cer(d18:1/24:0)	-0.037465	-0.105193	0.0302625	0.278647	0.880983
97	Hex2Cer(d18:1/24:1)	-0.0106486	-0.0778968	0.0565996	0.75638	0.985606
98	Hex2Cer(d18:2/16:0)	0.010987	-0.0557858	0.0777598	0.747169	0.985606
99	Hex2Cer(d18:2/24:1)	0.0423348	-0.024952	0.109622	0.217933	0.802312
100	Hex3Cer(d18:1/16:0)	0.0297357	-0.0301566	0.0896279	0.330839	0.909234
101	Hex3Cer(d18:1/18:0)	-0.00160804	-0.0587285	0.0555125	0.956013	0.988375
102	Hex3Cer(d18:1/20:0)	0.0211225	-0.0390245	0.0812695	0.491486	0.949441
103	Hex3Cer(d18:1/22:0)	-0.0354555	-0.0963923	0.0254812	0.254513	0.865296
104	Hex3Cer(d18:1/24:0)	-0.01943	-0.080238	0.041378	0.531339	0.949441
105	Hex3Cer(d18:1/24:1)	-0.0160693	-0.0781668	0.0460281	0.612176	0.977557
106	GM3(d18:1/16:0)	0.0359641	-0.0275657	0.099494	0.26758	0.875606
107	GM3(d18:1/18:0)	-0.000922541	-0.0584283	0.0565833	0.974925	0.997272
108	GM3(d18:1/20:0)	-0.00759973	-0.0735181	0.0583186	0.821293	0.986498
109	GM3(d18:1/22:0)	-0.0109957	-0.0735299	0.0515384	0.730472	0.985606
110	GM3(d18:1/24:0)	-0.0562206	-0.116792	0.00435055	0.0693121	0.686564
111	GM3(d18:1/24:1)	-0.0125523	-0.0735958	0.0484912	0.68705	0.977557
112	GM1(d18:1/16:0)	-0.0171639	-0.0811867	0.0468588	0.599434	0.975659
113	Sulfatide (d18:1:/16:0(OH))	-0.0136155	-0.074156	0.0469251	0.659496	0.977557
114	Sulfatide (d18:1:/16:0)	-0.0247983	-0.0904364	0.0408398	0.459253	0.94418
115	Sulfatide (d18:1:/24:0(OH))	-0.0215908	-0.0873155	0.0441339	0.519877	0.949441
116	Sulfatide (d18:1:/24:0)	-0.0398858	-0.103255	0.0234832	0.217749	0.802312
117	Sulfatide (d18:1:/24:1(OH))	-0.0419432	-0.103809	0.0199222	0.184344	0.802312
118	Sulfatide (d18:1:/24:1)	-0.0358496	-0.0987974	0.0270981	0.264706	0.874006
119	SM(34:3)	0.0469085	-0.0122467	0.106064	0.12059	0.802312
120	SM(35:2) (b)	0.0115765	-0.0456694	0.0688223	0.691964	0.977557
121	SM(37:1)	0.0186193	-0.040804	0.0780426	0.539331	0.949441
122	SM(37:2)	0.0343089	-0.0249525	0.0935702	0.256885	0.867728
123	SM(38:3) (a)	0.057522	-0.0097472	0.124791	0.0941927	0.795203
124	SM(38:3) (b)	0.0840173	0.0211677	0.146867	0.00898358	0.551987
125	SM(40:3) (a)	0.050991	-0.0123076	0.11429	0.114818	0.802312
126	SM(40:3) (b)	0.0652337	0.00350089	0.126967	0.0387168	0.632197
127	SM(41:0)	-0.0496362	-0.111453	0.0121806	0.115995	0.802312
128	SM(41:1) (a)	0.0253825	-0.0372841	0.0880491	0.427539	0.932659
129	SM(43:1)	-0.00763704	-0.0678181	0.052544	0.803647	0.985606
130	SM(43:2) (b)	0.0146309	-0.0471085	0.0763702	0.642453	0.977557
131	SM(43:2) (c)	-0.0117403	-0.0705944	0.0471138	0.695931	0.977557
132	SM(44:1)	-0.0283537	-0.0871946	0.0304871	0.345262	0.909234
133	SM(44:2)	-0.0318615	-0.090336	0.026613	0.285912	0.880983
134	SM(44:3)	-0.0190103	-0.0831082	0.0450875	0.561227	0.957089
135	SM(d16:1/19:0)	0.0169679	-0.0463575	0.0802934	0.599629	0.975659
136	SM(d16:1/23:0)/SM(d17:1/22:0)	-0.0144335	-0.071295	0.0424281	0.618984	0.977557
137	SM(d16:1/24:1)	0.00846671	-0.0524728	0.0694062	0.785461	0.985606
138	SM(d17:1/14:0)	0.0454186	-0.0158827	0.10672	0.146908	0.802312
139	SM(d17:1/16:0)	-0.0158903	-0.0750298	0.0432492	0.598617	0.975659
140	SM(d17:1/24:1)	0.00333919	-0.0572715	0.0639499	0.914042	0.987429
141	SM(d18:0/14:0)	0.0168071	-0.0420885	0.0757027	0.57612	0.968334
142	SM(d18:0/16:0)	-0.0371904	-0.098722	0.0243411	0.236565	0.825725
143	SM(d18:0/22:0)	-0.0447723	-0.105892	0.0163474	0.151523	0.802312
144	SM(d18:1/14:0/SM(d16:1/16:0)	-0.00208737	-0.0622149	0.0580401	0.945771	0.987429
145	SM(d18:1/16:0)	-0.0345617	-0.0903471	0.0212237	0.225045	0.804673
146	SM(d18:1/17:0)/SM(d17:1/18:0)	0.0487028	-0.0139813	0.111387	0.128259	0.802312
147	SM(d18:1/18:0/SM(d16:1/20:0)	0.00660814	-0.0470874	0.0603037	0.809463	0.985606
148	SM(d18:1/20:0)/SM(d16:1/22:0)	-0.00979453	-0.0664228	0.0468337	0.734709	0.985606
149	SM(d18:1/22:0)/SM(d16:1/24:0)	-0.0441615	-0.10042	0.0120973	0.124376	0.802312
150	SM(d18:1/23:0)/SM(d17:1/24:0)	-0.040737	-0.0957998	0.0143259	0.147497	0.802312
151	SM(d18:1/24:0)	-0.0640585	-0.122872	-0.00524501	0.0331306	0.613413
152	SM(d18:1/24:1)	-0.031578	-0.0917904	0.0286345	0.304355	0.909234
153	SM(d18:2/14:0)	0.138237	0.081984	0.194491	1.79794e-06	0.00131789
154	SM(d18:2/16:0)	0.0113237	-0.0446115	0.067259	0.691646	0.977557
155	SM(d18:2/17:0)	0.0223449	-0.0363139	0.0810038	0.455546	0.94418
156	SM(d18:2/18:0)	0.0238676	-0.0302421	0.0779773	0.387587	0.911808
157	SM(d18:2/18:1)	0.0522429	-0.0036616	0.108147	0.0674395	0.686564
158	SM(d18:2/20:0)	0.0296568	-0.0275746	0.0868882	0.310151	0.909234
159	SM(d18:2/22:0)	-0.00513019	-0.0588476	0.0485873	0.85157	0.986498
160	SM(d18:2/23:0)	0.0139929	-0.0428411	0.0708269	0.629558	0.977557
161	SM(d18:2/24:0)	-0.0315805	-0.0887382	0.0255772	0.279219	0.880983
162	SM(d19:1/24:1)	0.041667	-0.0228702	0.106204	0.206146	0.802312
163	PA(34:1)	-0.0265793	-0.0925423	0.0393837	0.429936	0.932659
164	PA(36:1)	-0.0415407	-0.108204	0.0251223	0.222367	0.802312
165	PA(36:2)	-0.0253409	-0.0895826	0.0389008	0.439702	0.932659
166	PA(36:3)	-0.018374	-0.0851264	0.0483784	0.589714	0.975659
167	PA(36:4)	-0.0161943	-0.082638	0.0502494	0.633008	0.977557
168	PA(40:6)	-0.00479065	-0.0720794	0.0624981	0.889062	0.987429
169	PC(14:0_16:0)	0.00534127	-0.0546821	0.0653646	0.861592	0.986498
170	PC(14:0_20:4)	0.0834972	0.0229815	0.144013	0.00701338	0.551987
171	PC(14:0_22:6)	0.0682711	0.00700615	0.129536	0.0292887	0.613413
172	PC(15-MHDA_18:1)	0.00247077	-0.061388	0.0663296	0.939573	0.987429
173	PC(15-MHDA_18:2)	0.0048688	-0.0568252	0.0665628	0.877119	0.987429
174	PC(15-MHDA_20:4)	0.0520924	-0.00914496	0.11333	0.0959096	0.795203
175	PC(15-MHDA_22:6)	0.0151684	-0.048888	0.0792247	0.642707	0.977557
176	PC(15:0_20:3)	0.0341843	-0.0282634	0.096632	0.283684	0.880983
177	PC(15:0_20:4)	0.0541839	-0.00690591	0.115274	0.0825822	0.767214
178	PC(15:0_22:6)	0.0291189	-0.0326795	0.0909172	0.356052	0.909234
179	PC(16:0_16:0)	-0.0485152	-0.104924	0.00789311	0.0922991	0.795203
180	PC(16:0_18:0)	-0.0300968	-0.0782507	0.0180572	0.220986	0.802312
181	PC(16:0_18:1)	-0.060024	-0.119924	-0.000123994	0.0499257	0.642114
182	PC(16:0_18:2)	-0.0628275	-0.123555	-0.00209988	0.0429682	0.632197
183	PC(16:0_18:3) (a)	-0.00859875	-0.0683609	0.0511634	0.77802	0.985606
184	PC(16:0_18:3) (b)	-0.00398076	-0.0646906	0.0567291	0.897777	0.987429
185	PC(16:0_20:3) (a)	0.0461907	-0.00923667	0.101618	0.102847	0.802312
186	PC(16:0_20:3) (b)	0.0411024	-0.0218549	0.10406	0.201114	0.802312
187	PC(16:0_20:4)	0.0315102	-0.0322137	0.0952341	0.332795	0.909234
188	PC(16:0_20:5)	0.0421292	-0.0202143	0.104473	0.18578	0.802312
189	PC(16:0_22:6)	-0.0226801	-0.0843221	0.0389618	0.471063	0.949441
190	PC(16:1_18:2)	0.0256928	-0.0320791	0.0834647	0.383693	0.911808
191	PC(16:1_20:4)	0.0726229	0.014519	0.130727	0.0145432	0.580146
192	PC(16:1_22:6)	0.0353413	-0.0254596	0.0961423	0.254985	0.865296
193	PC(17:0_18:1)	-0.00729176	-0.0674062	0.0528227	0.81215	0.985606
194	PC(17:0_18:2)	-0.0169608	-0.0732773	0.0393557	0.555189	0.957089
195	PC(17:0_20:4)	0.0584229	0.000386406	0.116459	0.0488898	0.642114
196	PC(17:0_22:6)	0.00021736	-0.0611977	0.0616324	0.994467	0.997272
197	PC(17:1_18:2)	-0.00338127	-0.0615595	0.0547969	0.90934	0.987429
198	PC(18:0_18:1)	-0.010105	-0.0670648	0.0468547	0.728159	0.985606
199	PC(18:0_18:2)	-0.00884278	-0.0653001	0.0476145	0.758944	0.985606
200	PC(18:0_20:3)	0.0897433	0.032224	0.147263	0.00231423	0.424083
201	PC(18:0_20:4)	0.0526558	-0.00673154	0.112043	0.0826875	0.767214
202	PC(18:0_22:4)	0.0413588	-0.0202709	0.102988	0.188838	0.802312
203	PC(18:0_22:5) (n3)	0.0155328	-0.0479452	0.0790108	0.631662	0.977557
204	PC(18:0_22:5) (n6)	0.033311	-0.0310514	0.0976734	0.310746	0.909234
205	PC(18:0_22:6)	0.0055642	-0.0559552	0.0670836	0.859345	0.986498
206	PC(18:1_18:1)	-0.0643409	-0.122909	-0.00577265	0.0316512	0.613413
207	PC(18:1_18:2)	-0.047908	-0.10471	0.00889395	0.0987653	0.802312
208	PC(18:1_20:3)	0.0309275	-0.0274466	0.0893016	0.299431	0.909234
209	PC(18:1_22:6) (a)	-0.0675394	-0.133303	-0.00177602	0.0445108	0.638152
210	PC(18:1_22:6) (b)	0.0536468	-0.010772	0.118066	0.103084	0.802312
211	PC(18:2_18:2)	-0.0347623	-0.0904871	0.0209625	0.221865	0.802312
212	PC(18:2_20:5)	0.0177628	-0.037802	0.0733276	0.531152	0.949441
213	PC(20:0_20:4)	-0.0207813	-0.0838835	0.0423209	0.518829	0.949441
214	PC(28:0)	0.0302292	-0.0322075	0.0926659	0.34298	0.909234
215	PC(31:0) (a)	0.00701777	-0.0588855	0.0729211	0.834734	0.986498
216	PC(31:0) (b)	0.0193147	-0.0462424	0.0848718	0.563816	0.957089
217	PC(32:1)	0.0149542	-0.0490707	0.0789791	0.647244	0.977557
218	PC(32:2)	0.0412361	-0.0200821	0.102554	0.187913	0.802312
219	PC(33:0) (a)	0.0139465	-0.0494283	0.0773212	0.666368	0.977557
220	PC(33:0) (b)	0.013688	-0.0479308	0.0753068	0.663412	0.977557
221	PC(33:1)	-0.00188678	-0.0646127	0.0608392	0.953004	0.988375
222	PC(33:2)	-0.0132526	-0.0740828	0.0475776	0.669505	0.977557
223	PC(34:5)	0.0762994	0.014089	0.13851	0.0164852	0.580146
224	PC(35:5)	0.0435177	-0.0197769	0.106812	0.178236	0.802312
225	PC(36:6) (a)	0.0571315	-0.00401297	0.118276	0.0674786	0.686564
226	PC(38:2)	0.00589429	-0.051116	0.0629046	0.839473	0.986498
227	PC(38:4) (b)	0.0655085	0.00564083	0.125376	0.0323285	0.613413
228	PC(38:5) (a)	0.0257218	-0.0364692	0.0879127	0.417852	0.932659
229	PC(38:5) (b)	0.0394742	-0.0209242	0.0998726	0.200631	0.802312
230	PC(38:6) (a)	0.0291091	-0.0228723	0.0810904	0.272771	0.880798
231	PC(38:7)(c)	-0.00289688	-0.060067	0.0542732	0.920916	0.987429
232	PC(39:5)(a)	0.0102255	-0.051384	0.0718349	0.745048	0.985606
233	PC(39:5)(b)	0.0204998	-0.0403919	0.0813915	0.509569	0.949441
234	PC(40:10)	-0.0765069	-0.142274	-0.0107395	0.0229094	0.580146
235	PC(40:7) (a)	0.0174705	-0.0376819	0.0726229	0.534893	0.949441
236	PC(40:8)	-0.0221536	-0.0750869	0.0307797	0.412331	0.932659
237	PC(44:12)	-0.0175095	-0.0769781	0.0419591	0.564069	0.957089
238	PC(O-16:0/16:0)	-0.0122042	-0.0753203	0.0509119	0.704814	0.977557
239	PC(O-16:0/20:3)	0.0389986	-0.027364	0.105361	0.249798	0.859182
240	PC(O-16:0/20:4)	0.0391762	-0.0209388	0.0992912	0.201925	0.802312
241	PC(O-16:0/22:6)	0.0194396	-0.0423214	0.0812006	0.537491	0.949441
242	PC(O-18:0/18:1)	-0.0610157	-0.123228	0.00119692	0.0549817	0.642114
243	PC(O-18:0/18:2)	-0.0496049	-0.112516	0.013306	0.122698	0.802312
244	PC(O-18:0/20:4)	0.0256745	-0.0339452	0.0852943	0.398935	0.919557
245	PC(O-18:0/22:6)	0.0114845	-0.0467108	0.0696798	0.699028	0.977557
246	PC(O-18:1/18:1)	-0.0362561	-0.09978	0.0272678	0.263673	0.874006
247	PC(O-18:1/18:2)	-0.0171888	-0.0846469	0.0502692	0.617641	0.977557
248	PC(O-32:1)	-0.052257	-0.116739	0.0122246	0.112651	0.802312
249	PC(O-32:2)	0.00061646	-0.0605346	0.0617675	0.984242	0.997272
250	PC(O-34:1)	-0.0613156	-0.127675	0.00504381	0.0705729	0.689733
251	PC(O-34:2)	0.00657014	-0.0598655	0.0730058	0.846363	0.986498
252	PC(O-34:4)	0.053574	-0.00709657	0.114245	0.0839463	0.769158
253	PC(O-35:4)	0.0672686	0.00258975	0.131947	0.0418839	0.632197
254	PC(O-36:0)	-0.072877	-0.135531	-0.0102234	0.0229237	0.580146
255	PC(O-36:5)	0.0657523	-9.37656e-05	0.131598	0.0507269	0.642114
256	PC(O-38:5)	-0.0032781	-0.0679525	0.0613963	0.920893	0.987429
257	PC(O-40:5)	0.0322226	-0.0304563	0.0949014	0.313993	0.909234
258	PC(O-40:7) (a)	-0.0021764	-0.0670017	0.0626489	0.947553	0.987429
259	PC(O-40:7) (b)	-0.00774012	-0.0760877	0.0606075	0.824409	0.986498
260	PC(P-15:0/20:4) (a)	0.00209608	-0.0630184	0.0672106	0.94971	0.987429
261	PC(P-15:0/20:4) (b)	0.0251202	-0.041459	0.0916993	0.459853	0.94418
262	PC(P-16:0/14:0)	0.0195797	-0.0408368	0.0799961	0.525513	0.949441
263	PC(P-16:0/16:0)	-0.0567598	-0.117731	0.00421173	0.0684936	0.686564
264	PC(P-16:0/16:1)	-0.0066563	-0.0654138	0.0521012	0.824351	0.986498
265	PC(P-16:0/18:0)	-0.0347003	-0.0912356	0.021835	0.229386	0.816214
266	PC(P-16:0/18:1)	-0.0552374	-0.110103	-0.000371545	0.0488643	0.642114
267	PC(P-16:0/18:2)	0.00840869	-0.0486307	0.0654481	0.772713	0.985606
268	PC(P-16:0/18:3)	0.0294248	-0.0340486	0.0928981	0.363874	0.911808
269	PC(P-16:0/20:4)	0.0151745	-0.0404269	0.0707759	0.592881	0.975659
270	PC(P-16:0/20:5)	0.0480867	-0.014863	0.111037	0.134793	0.802312
271	PC(P-16:0/22:6)	-0.00767529	-0.0663388	0.0509882	0.797689	0.985606
272	PC(P-17:0/20:4) (a)	0.0239283	-0.0369727	0.0848294	0.441509	0.932659
273	PC(P-17:0/20:4) (b)	0.0206579	-0.0378366	0.0791524	0.48905	0.949441
274	PC(P-18:0/18:2)	-0.0453964	-0.100606	0.00981308	0.107502	0.802312
275	PC(P-18:0/20:4)	0.00778628	-0.0452475	0.0608201	0.773616	0.985606
276	PC(P-18:0/22:5)	-0.0181382	-0.0745362	0.0382599	0.528671	0.949441
277	PC(P-18:0/22:6)	-0.00404604	-0.0597624	0.0516703	0.886859	0.987429
278	PC(P-18:1/18:1)	-0.00877389	-0.0688636	0.0513158	0.774822	0.985606
279	PC(P-18:1/22:6)	0.00291104	-0.0538152	0.0596372	0.919911	0.987429
280	PC(P-20:0/20:4)	-0.00643688	-0.0671664	0.0542927	0.835489	0.986498
281	PC(P-35:2)(a)	0.00312186	-0.0592576	0.0655013	0.921889	0.987429
282	PC(P-35:2)(b)	0.00991186	-0.0528647	0.0726884	0.75706	0.985606
283	PC(P-36:3)	0.0281431	-0.0295983	0.0858844	0.339761	0.909234
284	PC(P-38:5) (a)	0.00483774	-0.049127	0.0588025	0.860576	0.986498
285	PC(P-38:5) (b)	0.0224901	-0.0343548	0.0793351	0.438338	0.932659
286	LPC(14:0) [sn1]	0.0476168	-0.0140044	0.109238	0.130343	0.802312
287	LPC(14:0) [sn2]	0.0454263	-0.0161195	0.106972	0.148449	0.802312
288	LPC(15-MHDA) [sn1] [104_sn1]	0.00349071	-0.0585762	0.0655576	0.912257	0.987429
289	LPC(15-MHDA) [sn1] / LPC(17:0) [sn2]	0.00531275	-0.0555334	0.0661589	0.864167	0.986498
290	LPC(15-MHDA) [sn2]	0.0160608	-0.0463773	0.0784989	0.614306	0.977557
291	LPC(15:0) [sn1]	0.0114158	-0.0502446	0.0730762	0.716811	0.985606
292	LPC(15:0) [sn2]	0.0148484	-0.0476439	0.0773408	0.641575	0.977557
293	LPC(16:0) [sn1]	-0.033333	-0.0945254	0.0278595	0.286049	0.880983
294	LPC(16:0) [sn2]	-0.0245425	-0.0860324	0.0369473	0.434309	0.932659
295	LPC(16:1) [sn1]	0.0264408	-0.0341928	0.0870745	0.393011	0.911808
296	LPC(16:1) [sn2]	0.0347817	-0.0261954	0.0957588	0.26396	0.874006
297	LPC(17:0) [sn1]	-0.00269027	-0.0622382	0.0568577	0.929466	0.987429
298	LPC(17:1) (a) [sn1] [104_sn1]	-0.00126825	-0.0626658	0.0601293	0.967717	0.994862
299	LPC(17:1) [sn1] (a) / LPC(17:1) [sn2] (b)	0.00540833	-0.0563054	0.0671221	0.863672	0.986498
300	LPC(17:1) [sn1] (b)	0.0215644	-0.0431658	0.0862946	0.513999	0.949441
301	LPC(17:1) [sn2] (a)	-0.000161403	-0.0618691	0.0615463	0.995911	0.997272
302	LPC(18:0) [sn1]	-0.00490185	-0.0640294	0.0542257	0.870968	0.987429
303	LPC(18:0) [sn2]	-0.00034498	-0.0602992	0.0596092	0.991005	0.997272
304	LPC(18:1) [sn1]	-0.0393676	-0.0985095	0.0197742	0.192442	0.802312
305	LPC(18:1) [sn2]	-0.043251	-0.103776	0.0172739	0.161781	0.802312
306	LPC(18:2) [sn1]	-0.0276605	-0.0865194	0.0311983	0.357323	0.909234
307	LPC(18:2) [sn2]	-0.0356386	-0.0951828	0.0239055	0.241159	0.833818
308	LPC(18:3) (a) [sn1] [104_sn1]	-0.0267304	-0.0876757	0.034215	0.390283	0.911808
309	LPC(18:3) [sn1] (a)/LPC(18:3) [sn2] (b)	-0.0187971	-0.0792016	0.0416074	0.542112	0.949441
310	LPC(18:3) [sn1] (b)	-0.0105291	-0.0710572	0.0499989	0.733244	0.985606
311	LPC(18:3) [sn2] (a)	-0.0160907	-0.0769267	0.0447454	0.604343	0.975734
312	LPC(19:0) (a) [sn1] [104_sn1]	0.0114826	-0.0478365	0.0708018	0.704505	0.977557
313	LPC(19:0) [sn1] (a) / LPC(19:0) [sn2] (b)	-0.00868698	-0.0674499	0.050076	0.772096	0.985606
314	LPC(19:0) [sn1] (b)	-0.0310787	-0.089515	0.0273575	0.29759	0.909234
315	LPC(19:0) [sn2] (a)	0.0135914	-0.0463547	0.0735374	0.656905	0.977557
316	LPC(19:1) (a)	-0.0118819	-0.0726785	0.0489148	0.701797	0.977557
317	LPC(19:1) (b)	0.00171541	-0.0586453	0.0620762	0.955596	0.988375
318	LPC(19:1) (c)	0.0162907	-0.0461219	0.0787033	0.609102	0.977557
319	LPC(20:0) [sn1]	-0.0554853	-0.118773	0.00780245	0.0861807	0.779882
320	LPC(20:0) [sn2]	-0.0502753	-0.113617	0.0130668	0.120246	0.802312
321	LPC(20:1) [sn1]	-0.048173	-0.113123	0.016777	0.14648	0.802312
322	LPC(20:1) [sn2]	-0.0335845	-0.0988468	0.0316779	0.313507	0.909234
323	LPC(20:2) [sn1]	-0.0136921	-0.0762678	0.0488836	0.668157	0.977557
324	LPC(20:2) [sn2]	-0.00226344	-0.065192	0.0606651	0.943818	0.987429
325	LPC(20:3) [sn1]	0.0413848	-0.0190421	0.101812	0.179924	0.802312
326	LPC(20:3) [sn2]	0.0540561	-0.00669108	0.114803	0.081586	0.767214
327	LPC(20:4) [sn1]	0.0300462	-0.0301532	0.0902457	0.32829	0.909234
328	LPC(20:4) [sn2]	0.0393955	-0.0205713	0.0993623	0.198307	0.802312
329	LPC(20:5) [sn1]	0.0345776	-0.0287556	0.0979108	0.284955	0.880983
330	LPC(20:5) [sn2]	0.0435578	-0.0193835	0.106499	0.175418	0.802312
331	LPC(22:0) [sn1]	-0.0829971	-0.146527	-0.0194673	0.0106615	0.551987
332	LPC(22:0) [sn2]	-0.0853991	-0.150148	-0.0206503	0.00993967	0.551987
333	LPC(22:1) [sn1]	-0.0821762	-0.143682	-0.02067	0.00902123	0.551987
334	LPC(22:1) [sn2]	-0.0660364	-0.128258	-0.00381494	0.0378793	0.632197
335	LPC(22:4) [sn1]	0.00616549	-0.0571253	0.0694563	0.848634	0.986498
336	LPC(22:4) [sn2]	0.0151151	-0.0480104	0.0782406	0.638994	0.977557
337	LPC(22:5) (n3) [sn1] [104_sn1]	0.00549937	-0.0556047	0.0666034	0.860031	0.986498
338	LPC(22:5) [sn1] (n3)/LPC(22:5) [sn2] (n6)	-0.00471713	-0.0659493	0.0565151	0.880026	0.987429
339	LPC(22:5) [sn1] (n6)	0.00382519	-0.0597641	0.0674144	0.906179	0.987429
340	LPC(22:5) [sn2] (n3)	0.00658273	-0.054605	0.0677705	0.833058	0.986498
341	LPC(22:6) [sn1]	-0.0252825	-0.0871024	0.0365375	0.423073	0.932659
342	LPC(22:6) [sn2]	-0.0141554	-0.076144	0.0478332	0.6546	0.977557
343	LPC(24:0) [sn1]	-0.0660704	-0.129833	-0.0023082	0.0426438	0.632197
344	LPC(24:0) [sn2]	-0.0477805	-0.112526	0.0169651	0.148513	0.802312
345	LPC(26:0) [sn1]	-0.00516401	-0.0671758	0.0568478	0.870395	0.987429
346	LPC(26:0) [sn2]	0.0182722	-0.0461797	0.0827241	0.578622	0.968334
347	LPC(O-16:0)	0.00581217	-0.0588721	0.0704964	0.860255	0.986498
348	LPC(O-18:0)	-0.00202777	-0.0639476	0.0598921	0.94884	0.987429
349	LPC(O-18:1)	-0.0223024	-0.0878891	0.0432842	0.505322	0.949441
350	LPC(O-20:0)	-0.0321637	-0.0961176	0.0317901	0.324615	0.909234
351	LPC(O-20:1)	-4.23139e-05	-0.0653567	0.0652721	0.998987	0.998987
352	LPC(O-22:0)	-0.0315581	-0.095992	0.0328757	0.337412	0.909234
353	LPC(O-22:1)	-0.0126547	-0.0784747	0.0531652	0.706412	0.977557
354	LPC(O-24:0)	-0.0137115	-0.0789754	0.0515524	0.680627	0.977557
355	LPC(O-24:1)	-0.000328445	-0.0666187	0.0659618	0.992255	0.997272
356	LPC(O-24:2)	-0.00804532	-0.0765845	0.0604938	0.818105	0.986498
357	LPC(P-16:0)	-0.00340321	-0.0646159	0.0578095	0.913259	0.987429
358	LPC(P-17:0) (a)	0.00131086	-0.0584728	0.0610946	0.965733	0.994217
359	LPC(P-17:0) (b)	-0.00896455	-0.0674625	0.0495334	0.763993	0.985606
360	LPC(P-18:0)	-0.0218444	-0.0783594	0.0346707	0.448959	0.93757
361	LPC(P-18:1)	-0.00844386	-0.0691872	0.0522994	0.785352	0.985606
362	LPC(P-20:0)	-0.0289894	-0.0908251	0.0328463	0.358484	0.909234
363	PE(15-MHDA_18:1)	-0.00560845	-0.0637038	0.0524869	0.849979	0.986498
364	PE(15-MHDA_18:2)	-0.0127406	-0.0688849	0.0434037	0.656622	0.977557
365	PE(15-MHDA_20:4)	0.00780259	-0.0538083	0.0694135	0.804038	0.985606
366	PE(15-MHDA_22:6)	0.0357108	-0.0280054	0.099427	0.272364	0.880798
367	PE(16:0_16:0)	-0.034182	-0.0881737	0.0198097	0.215077	0.802312
368	PE(16:0_16:1)	-0.00737822	-0.0678558	0.0530993	0.811085	0.985606
369	PE(16:0_18:1)	-0.0334402	-0.083704	0.0168235	0.192677	0.802312
370	PE(16:0_18:2)	-0.057508	-0.106443	-0.00857299	0.0215551	0.580146
371	PE(16:0_18:3) (a)	-0.0238086	-0.078007	0.0303899	0.389539	0.911808
372	PE(16:0_18:3) (b)	-0.0184785	-0.0729112	0.0359542	0.506036	0.949441
373	PE(16:0_20:3)	-0.00939169	-0.059311	0.0405277	0.712428	0.981598
374	PE(16:0_20:4)	-0.0148857	-0.0707468	0.0409755	0.601634	0.975659
375	PE(16:0_20:5)	0.0121943	-0.047204	0.0715926	0.687528	0.977557
376	PE(16:0_22:6)	0.012817	-0.0521175	0.0777515	0.698971	0.977557
377	PE(16:1_18:2)	-0.0130706	-0.0659564	0.0398152	0.628249	0.977557
378	PE(16:1_20:4)	-0.0121068	-0.0672158	0.0430021	0.666901	0.977557
379	PE(17:0_18:1)	-0.0363105	-0.0874994	0.0148784	0.164883	0.802312
380	PE(17:0_18:2)	-0.0377297	-0.0865266	0.0110672	0.130113	0.802312
381	PE(17:0_20:4)	0.0116205	-0.0457875	0.0690284	0.691681	0.977557
382	PE(17:0_22:6)	0.00634507	-0.0559601	0.0686502	0.841849	0.986498
383	PE(18:0_18:1)	-0.0130652	-0.0601361	0.0340056	0.586598	0.975659
384	PE(18:0_18:2)	-0.0323215	-0.0783971	0.0137542	0.169605	0.802312
385	PE(18:0_20:3) (a)	0.0492223	-0.00103967	0.0994843	0.0553398	0.642114
386	PE(18:0_20:3) (b)	0.031955	-0.0290219	0.0929319	0.304716	0.909234
387	PE(18:0_20:4)	0.0122465	-0.0427627	0.0672557	0.662721	0.977557
388	PE(18:0_22:4)	0.0227377	-0.0382009	0.0836763	0.46483	0.949441
389	PE(18:0_22:5) (n3)	0.0161232	-0.0428743	0.0751207	0.592379	0.975659
390	PE(18:0_22:5) (n6)	0.0439307	-0.0158504	0.103712	0.150231	0.802312
391	PE(18:0_22:6)	0.0359682	-0.0253724	0.0973088	0.250839	0.859182
392	PE(18:1_18:1)	-0.025887	-0.0791622	0.0273881	0.341235	0.909234
393	PE(18:1_18:2)	-0.0418449	-0.0936082	0.00991836	0.113552	0.802312
394	PE(18:1_22:6) (a)	-0.0303168	-0.090941	0.0303073	0.327355	0.909234
395	PE(18:1_22:6) (b)	0.0310152	-0.0302597	0.0922901	0.321506	0.909234
396	PE(20:0_20:4)	-0.0740747	-0.136233	-0.0119166	0.0197902	0.580146
397	PE(36:0)	-0.0315122	-0.0980649	0.0350405	0.35371	0.909234
398	PE(38:5) (a)	-0.0135745	-0.0663213	0.0391722	0.614133	0.977557
399	PE(38:5) (b)	0.0192582	-0.0368276	0.075344	0.50117	0.949441
400	PE(O-16:0/18:2)	0.0145052	-0.0507143	0.0797247	0.663034	0.977557
401	PE(O-16:0/20:3)	0.0744338	0.0116203	0.137247	0.0204919	0.580146
402	PE(O-16:0/20:4)	0.0799896	0.0199361	0.140043	0.00923345	0.551987
403	PE(O-16:0/22:4)	0.0407743	-0.0233597	0.104908	0.213151	0.802312
404	PE(O-16:0/22:6)	0.0250731	-0.0324001	0.0825463	0.392813	0.911808
405	PE(O-18:0/20:4)	0.0564306	-0.00236665	0.115228	0.0603793	0.660568
406	PE(O-18:0/22:5)	0.0495795	-0.0102593	0.109418	0.104843	0.802312
407	PE(O-18:0/22:6)	0.0191934	-0.0335782	0.071965	0.476171	0.949441
408	PE(O-18:1/18:2)	0.0160897	-0.047475	0.0796544	0.619968	0.977557
409	PE(O-18:1/22:6)	0.0385425	-0.0171039	0.094189	0.175049	0.802312
410	PE(O-34:1)	-0.0037134	-0.0630981	0.0556713	0.90249	0.987429
411	PE(O-36:5)	0.0612713	-0.000747182	0.12329	0.0532296	0.642114
412	PE(O-38:5) (a)	0.0655408	0.00641652	0.124665	0.0301427	0.613413
413	PE(O-38:5) (b)	0.0588657	-0.00140223	0.119134	0.0559839	0.642114
414	PE(P-15:0/20:4) (a)	-0.00301218	-0.0676915	0.0616671	0.927297	0.987429
415	PE(P-15:0/20:4) (b)	0.0209277	-0.0468603	0.0887158	0.545313	0.949441
416	PE(P-15:0/22:6) (a)	-0.00719863	-0.0724058	0.0580086	0.828758	0.986498
417	PE(P-15:0/22:6) (b)	0.0280133	-0.0381531	0.0941798	0.40693	0.926248
418	PE(P-16:0/18:1)	-0.015833	-0.083934	0.052268	0.648759	0.977557
419	PE(P-16:0/18:2)	-0.0422266	-0.109677	0.0252239	0.220229	0.802312
420	PE(P-16:0/18:3)	-0.00705965	-0.0741714	0.0600521	0.836714	0.986498
421	PE(P-16:0/20:3) (a)	0.0466043	-0.0202706	0.113479	0.172417	0.802312
422	PE(P-16:0/20:3) (b)	0.0400796	-0.0260137	0.106173	0.235022	0.825725
423	PE(P-16:0/20:4)	0.0273744	-0.0337163	0.088465	0.380107	0.911808
424	PE(P-16:0/20:5)	0.0273068	-0.0372961	0.0919098	0.407693	0.926248
425	PE(P-16:0/22:4)	0.000320293	-0.0649527	0.0655933	0.992329	0.997272
426	PE(P-16:0/22:5) (n3)	0.0211197	-0.0418261	0.0840655	0.511001	0.949441
427	PE(P-16:0/22:5) (n6)	0.018952	-0.0478589	0.0857628	0.578401	0.968334
428	PE(P-16:0/22:6)	-0.0117345	-0.0714395	0.0479705	0.700192	0.977557
429	PE(P-17:0/20:4) (a)	0.048321	-0.0126065	0.109249	0.120535	0.802312
430	PE(P-17:0/20:4) (b)	0.0398032	-0.0192546	0.0988609	0.186946	0.802312
431	PE(P-17:0/22:6) (a)	0.021402	-0.0365744	0.0793785	0.469597	0.949441
432	PE(P-17:0/22:6) (b)	-0.00948353	-0.0661286	0.0471616	0.742903	0.985606
433	PE(P-18:0/18:1)	-0.0215357	-0.0881106	0.0450391	0.526276	0.949441
434	PE(P-18:0/18:2)	-0.0558569	-0.121637	0.00992324	0.0965029	0.795203
435	PE(P-18:0/18:3)	-0.0197821	-0.086628	0.0470638	0.562082	0.957089
436	PE(P-18:0/20:3) (a)	0.0413637	-0.0236338	0.106361	0.212703	0.802312
437	PE(P-18:0/20:3) (b)	0.0439512	-0.0188937	0.106796	0.170901	0.802312
438	PE(P-18:0/20:4)	0.0390649	-0.018154	0.0962838	0.181291	0.802312
439	PE(P-18:0/20:5)	0.0413263	-0.0214392	0.104092	0.197307	0.802312
440	PE(P-18:0/22:4)	-0.0135781	-0.0781964	0.0510402	0.680577	0.977557
441	PE(P-18:0/22:5) (n3)	0.0154556	-0.0444158	0.0753269	0.613043	0.977557
442	PE(P-18:0/22:5) (n6)	0.0175499	-0.0458427	0.0809425	0.587571	0.975659
443	PE(P-18:0/22:6)	-0.00227823	-0.0579225	0.053366	0.936064	0.987429
444	PE(P-18:1/18:1)	-0.0203887	-0.0821162	0.0413388	0.517595	0.949441
445	PE(P-18:1/18:1) (a)	-0.0277882	-0.0896154	0.0340391	0.37867	0.911808
446	PE(P-18:1/18:1) (b)	0.0112627	-0.0521486	0.0746741	0.727854	0.985606
447	PE(P-18:1/18:2) (a)	-0.042337	-0.106981	0.0223073	0.199698	0.802312
448	PE(P-18:1/18:2) (b)	-0.012294	-0.0762558	0.0516679	0.706492	0.977557
449	PE(P-18:1/18:3)	-0.00984237	-0.0759198	0.056235	0.770416	0.985606
450	PE(P-18:1/20:3) (a)	0.0425896	-0.0204568	0.105636	0.185931	0.802312
451	PE(P-18:1/20:3) (b)	0.0599461	-0.00243489	0.122327	0.0600547	0.660568
452	PE(P-18:1/20:4) (a)	0.0276611	-0.0303813	0.0857034	0.350594	0.909234
453	PE(P-18:1/20:4) (b)	0.0482852	-0.00817404	0.104744	0.0941464	0.795203
454	PE(P-18:1/20:5) (a)	0.0558402	-0.00549581	0.117176	0.0748024	0.72145
455	PE(P-18:1/20:5) (b)	0.0444125	-0.0188482	0.107673	0.169261	0.802312
456	PE(P-18:1/22:4)	0.0240589	-0.0366329	0.0847507	0.437446	0.932659
457	PE(P-18:1/22:5) (a)	0.0351856	-0.0198246	0.0901959	0.210393	0.802312
458	PE(P-18:1/22:5) (b)	0.0416813	-0.0202781	0.103641	0.187765	0.802312
459	PE(P-18:1/22:6) (a)	-0.00296334	-0.0620054	0.0560788	0.921665	0.987429
460	PE(P-18:1/22:6) (b)	0.0243947	-0.0301461	0.0789355	0.380978	0.911808
461	PE(P-19:0/20:4) (a)	0.0426611	-0.0211916	0.106514	0.190798	0.802312
462	PE(P-19:0/20:4) (b)	0.0209437	-0.0423642	0.0842516	0.516934	0.949441
463	PE(P-20:0/18:1)	-0.0572978	-0.126665	0.0120698	0.105913	0.802312
464	PE(P-20:0/18:2)	-0.0804003	-0.148839	-0.0119616	0.0216009	0.580146
465	PE(P-20:0/20:4)	0.0206739	-0.0455138	0.0868617	0.5406	0.949441
466	PE(P-20:0/22:6)	-0.00214501	-0.0673743	0.0630843	0.948628	0.987429
467	PE(P-20:1/20:4)	0.0157491	-0.0516976	0.0831958	0.647335	0.977557
468	PE(P-20:1/22:6)	0.0112557	-0.0539784	0.0764897	0.735327	0.985606
469	LPE(16:0) [sn1]	-0.0418391	-0.0992807	0.0156025	0.153856	0.802312
470	LPE(16:0) [sn2]	-0.0182458	-0.076754	0.0402623	0.54125	0.949441
471	LPE(17:0) [sn1]	0.0217639	-0.0467302	0.090258	0.533631	0.949441
472	LPE(17:0) [sn2]	0.00110481	-0.0655406	0.0677503	0.974089	0.997272
473	LPE(18:0) [sn1]	-0.0208893	-0.0797661	0.0379874	0.487038	0.949441
474	LPE(18:0) [sn2]	-0.0139494	-0.0736771	0.0457784	0.647272	0.977557
475	LPE(18:1) [sn1]	-0.0217355	-0.0772272	0.0337561	0.442921	0.932659
476	LPE(18:1) [sn2]	-0.0174744	-0.0739412	0.0389924	0.544351	0.949441
477	LPE(18:2) [sn1]	-0.0454979	-0.101302	0.0103062	0.110499	0.802312
478	LPE(18:2) [sn2]	-0.0364234	-0.0934689	0.0206222	0.211195	0.802312
479	LPE(20:4) [sn1]	-0.00146291	-0.0596557	0.0567299	0.960716	0.991191
480	LPE(20:4) [sn2]	-0.00198172	-0.0609242	0.0569608	0.947478	0.987429
481	LPE(22:6) [sn1]	-0.0144652	-0.0740613	0.045131	0.634417	0.977557
482	LPE(22:6) [sn2]	-0.00770378	-0.0688851	0.0534776	0.805138	0.985606
483	LPE(P-16:0)	0.0163715	-0.0491784	0.0819215	0.624627	0.977557
484	LPE(P-18:0)	0.00653022	-0.0561101	0.0691705	0.838157	0.986498
485	LPE(P-18:1)	0.00290069	-0.060951	0.0667524	0.929076	0.987429
486	LPE(P-20:0)	0.00580907	-0.0599921	0.0716103	0.862676	0.986498
487	PI (38:5) (b)	0.0143757	-0.0452387	0.0739901	0.636618	0.977557
488	PI(15-MHDA_20:4)\PI(17:0_20:4)	0.00488675	-0.0515866	0.0613601	0.865372	0.986498
489	PI(16:0_16:1)	0.0267242	-0.0384505	0.0918989	0.421862	0.932659
490	PI(16:0_20:3) (a)	-0.0109297	-0.0689866	0.0471272	0.712251	0.981598
491	PI(16:0_20:3) (b)	0.0189857	-0.0422289	0.0802003	0.543459	0.949441
492	PI(16:0_20:4)	-0.00603345	-0.0622271	0.0501602	0.833384	0.986498
493	PI(16:0/16:0)	-0.00400525	-0.0694689	0.0614584	0.904583	0.987429
494	PI(17:0_18:1)	-0.0255056	-0.0909685	0.0399572	0.445335	0.932659
495	PI(17:0_18:2)	-0.0377213	-0.0979757	0.0225331	0.220232	0.802312
496	PI(18:0_18:1)	-0.0130291	-0.0693884	0.0433302	0.65061	0.977557
497	PI(18:0_20:2)	-0.0263421	-0.0854631	0.0327788	0.382802	0.911808
498	PI(18:0_20:3) (a)	0.0175169	-0.0505858	0.0856196	0.614326	0.977557
499	PI(18:0_20:3) (b)	0.0254179	-0.0368425	0.0876783	0.423887	0.932659
500	PI(18:0_20:4)	-0.0272592	-0.0847411	0.0302226	0.352967	0.909234
501	PI(18:0_22:4)	0.0202954	-0.0376751	0.0782659	0.492822	0.949441
502	PI(18:0_22:5) (n3)	-0.00508977	-0.0702495	0.0600699	0.878364	0.987429
503	PI(18:0_22:5) (n6)	0.0223809	-0.0442515	0.0890133	0.510542	0.949441
504	PI(18:0_22:6)	0.00220925	-0.0617622	0.0661807	0.946053	0.987429
505	PI(18:1_18:2)	-0.0558009	-0.121046	0.00944474	0.0941383	0.795203
506	PI(20:0_20:4)	-0.0367831	-0.101258	0.0276916	0.263877	0.874006
507	PI(34:0)	-0.00867411	-0.0738423	0.0564941	0.794261	0.985606
508	PI(34:1)	-0.0207725	-0.0803342	0.0387891	0.494482	0.949441
509	PI(36:2)	-0.0657035	-0.129907	-0.00149945	0.0452714	0.638152
510	PI(37:6)	0.00866363	-0.0567154	0.0740426	0.795152	0.985606
511	PI(38:5) (a)	-0.0230183	-0.0806334	0.0345968	0.433864	0.932659
512	PI(38:6)	0.00292156	-0.0602306	0.0660737	0.927778	0.987429
513	PI(39:6)	-0.00809729	-0.0720068	0.0558122	0.803953	0.985606
514	PIP1(38:4)	0.00202358	-0.0663597	0.0704068	0.953766	0.988375
515	LPI(18:0) [sn1]	-0.0147612	-0.0810349	0.0515124	0.662572	0.977557
516	LPI(18:0) [sn2]	0.0119975	-0.0556998	0.0796947	0.72843	0.985606
517	LPI(18:1) [sn1]	-0.0242114	-0.0862313	0.0378085	0.444446	0.932659
518	LPI(18:1) [sn2]	-0.024511	-0.0884842	0.0394621	0.45293	0.943176
519	LPI(18:2) [sn1]	-0.0213915	-0.0875224	0.0447393	0.526287	0.949441
520	LPI(18:2) [sn2]	-0.0293376	-0.0966247	0.0379495	0.393085	0.911808
521	LPI(20:4) [sn1]	-0.00242415	-0.0641827	0.0593344	0.938698	0.987429
522	LPI(20:4) [sn2]	0.00211811	-0.0610553	0.0652916	0.947623	0.987429
523	PS(36:1)	-0.0473382	-0.11582	0.0211435	0.175908	0.802312
524	PS(36:2)	-0.0289377	-0.0973491	0.0394737	0.407352	0.926248
525	PS(38:3)	-0.0351643	-0.103456	0.033127	0.313216	0.909234
526	PS(38:4)	-0.0386747	-0.107181	0.0298318	0.268897	0.876006
527	PS(38:5)	-0.011665	-0.0796053	0.0562753	0.73658	0.985606
528	PS(40:5)	-0.00696208	-0.0757961	0.0618719	0.842916	0.986498
529	PS(40:6)	-0.00734803	-0.0758998	0.0612037	0.833658	0.986498
530	PG(34:1)	-0.00902596	-0.0588302	0.0407783	0.722542	0.985606
531	PG(36:1)	0.00666248	-0.0407298	0.0540548	0.782984	0.985606
532	PG(36:2)	-0.0371135	-0.089931	0.0157041	0.168886	0.802312
533	CE(14:0)	0.0627902	0.000702566	0.124878	0.0478567	0.642114
534	CE(15:0)	0.0307138	-0.0234654	0.084893	0.266909	0.875606
535	CE(16:0)	0.029166	-0.0233707	0.0817027	0.27693	0.880983
536	CE(16:1)	0.0670876	0.00320049	0.130975	0.0399482	0.632197
537	CE(16:2)	0.0391416	-0.010295	0.0885782	0.121161	0.802312
538	CE(17:0)	0.0278066	-0.0320293	0.0876424	0.362699	0.911808
539	CE(17:1)	0.0303485	-0.0275809	0.0882779	0.304866	0.909234
540	CE(18:0)	0.0337246	-0.0167434	0.0841925	0.190719	0.802312
541	CE(18:1)	-0.0117192	-0.0637305	0.0402922	0.658899	0.977557
542	CE(18:2)	0.0273815	-0.029467	0.0842301	0.345476	0.909234
543	CE(18:3)	0.0211889	-0.0311602	0.073538	0.427858	0.932659
544	CE(20:0)	0.0132106	-0.0447383	0.0711594	0.655145	0.977557
545	CE(20:1)	-0.0255129	-0.083728	0.0327023	0.390655	0.911808
546	CE(20:2)	0.0273692	-0.0298657	0.0846041	0.348957	0.909234
547	CE(20:3)	0.0846015	0.0308653	0.138338	0.00211151	0.424083
548	CE(20:4)	0.0508656	0.0131227	0.0886084	0.00844225	0.551987
549	CE(20:5)	0.0340288	-0.01741	0.0854676	0.195198	0.802312
550	CE(22:0)	-0.0334029	-0.0939884	0.0271826	0.280246	0.880983
551	CE(22:1)	-0.0459268	-0.106956	0.0151021	0.140675	0.802312
552	CE(22:4)	0.0387079	-0.00963557	0.0870514	0.117028	0.802312
553	CE(22:5) (n3)	0.0210934	-0.0270666	0.0692533	0.390942	0.911808
554	CE(22:5) (n6)	0.0586576	0.00469741	0.112618	0.0334741	0.613413
555	CE(22:6)	0.000905472	-0.04966	0.0514709	0.972012	0.997272
556	CE(24:0)	-0.0462057	-0.107656	0.0152445	0.141002	0.802312
557	CE(24:1)	-0.0397469	-0.101673	0.0221795	0.208815	0.802312
558	CE(24:4)	0.00364438	-0.0625581	0.0698469	0.91411	0.987429
559	CE(24:5)	0.00821986	-0.0537446	0.0701843	0.794939	0.985606
560	CE(24:6)	0.0916934	0.0254826	0.157904	0.00680709	0.551987
561	COH	0.0273205	-0.0251361	0.079777	0.307704	0.909234
562	DE(16:0)	-0.00341788	-0.0615271	0.0546913	0.908254	0.987429
563	DE(18:1)	0.0317756	-0.0251989	0.0887502	0.274722	0.880983
564	DE(18:2)	-0.0381673	-0.0861831	0.00984856	0.119697	0.802312
565	DE(20:4)	0.00629049	-0.032047	0.044628	0.747853	0.985606
566	DE(20:5)	0.0103005	-0.0416527	0.0622538	0.697693	0.977557
567	DE(22:6)	0.00426212	-0.0422123	0.0507365	0.857402	0.986498
568	FA(14:0)	-0.023614	-0.0858537	0.0386256	0.457352	0.94418
569	FA(15:0)	-0.0398829	-0.105387	0.0256214	0.233138	0.825557
570	FA(16:0)	-0.043227	-0.106527	0.0200734	0.181189	0.802312
571	FA(16:1)	-0.0418616	-0.106792	0.0230689	0.206787	0.802312
572	FA(16:2)	0.000563496	-0.0668597	0.0679867	0.986935	0.997272
573	FA(17:0)	-0.0629724	-0.127881	0.00193647	0.0576506	0.650122
574	FA(17:1)	-0.0180093	-0.0825721	0.0465535	0.584743	0.975659
575	FA(18:0)	-0.0127662	-0.0781014	0.052569	0.701858	0.977557
576	FA(18:1)	-0.0431046	-0.107649	0.0214402	0.190993	0.802312
577	FA(18:2)	-0.0379142	-0.104335	0.0285064	0.263613	0.874006
578	FA(18:3)	-0.0310009	-0.0960709	0.0340691	0.35074	0.909234
579	FA(20:2)	-0.012631	-0.0776709	0.0524088	0.703587	0.977557
580	FA(20:3)	0.010664	-0.0536664	0.0749944	0.74535	0.985606
581	FA(20:4)	0.00362676	-0.061209	0.0684625	0.912729	0.987429
582	FA(20:5)	0.0165805	-0.0501664	0.0833275	0.626498	0.977557
583	FA(22:4)	-0.00699108	-0.0712995	0.0573173	0.831331	0.986498
584	FA(22:5)	-0.00556924	-0.0688613	0.0577228	0.863122	0.986498
585	FA(22:6)	-0.00786409	-0.0714378	0.0557096	0.808502	0.985606
586	AC(12:0)	0.00442713	-0.0616255	0.0704798	0.895523	0.987429
587	AC(13:0)	-0.0538593	-0.120382	0.0126633	0.112996	0.802312
588	AC(14:0)	-0.00025916	-0.0623835	0.0618651	0.993479	0.997272
589	AC(14:1)	-0.0129395	-0.0791097	0.0532307	0.701633	0.977557
590	AC(14:2)	-0.0119121	-0.0788517	0.0550276	0.727356	0.985606
591	AC(15:0) (a)	0.0122945	-0.0516008	0.0761898	0.706189	0.977557
592	AC(15:0) (b)	0.00518891	-0.0592582	0.069636	0.874654	0.987429
593	AC(16:0)	-0.00574036	-0.0689082	0.0574275	0.858685	0.986498
594	AC(16:1)	-0.00492082	-0.0678137	0.0579721	0.878165	0.987429
595	AC(17:0) (a)	0.0113743	-0.0523093	0.0750579	0.726393	0.985606
596	AC(17:0) (b)	0.0126226	-0.049257	0.0745023	0.689417	0.977557
597	AC(18:0)	-0.0102396	-0.0707466	0.0502673	0.740223	0.985606
598	AC(18:1)	-0.00376229	-0.0687941	0.0612695	0.909753	0.987429
599	AC(18:2)	-0.00965251	-0.0752176	0.0559125	0.773011	0.985606
600	DG(14:0_16:0)	0.0263836	-0.028457	0.0812242	0.346039	0.909234
601	DG(14:0_18:2)	0.0357342	-0.0126256	0.0840939	0.147991	0.802312
602	DG(16:0_16:0)	-0.0032216	-0.0559827	0.0495395	0.904773	0.987429
603	DG(16:0_16:1)	0.0419065	-0.0164303	0.100243	0.15959	0.802312
604	DG(16:0_18:1)	-0.0096614	-0.0559562	0.0366334	0.682639	0.977557
605	DG(16:0_18:2)	0.000167516	-0.0516473	0.0519823	0.994946	0.997272
606	DG(16:0_20:4)	0.0549585	0.00179706	0.10812	0.0431239	0.632197
607	DG(16:0_22:5)	0.0629099	0.00935588	0.116464	0.0216096	0.580146
608	DG(16:0_22:6)	0.0430116	-0.0162598	0.102283	0.155388	0.802312
609	DG(16:1_18:1)	0.0479331	-0.000908237	0.0967744	0.054823	0.642114
610	DG(18:0_18:1)	-0.0148938	-0.0641012	0.0343135	0.553214	0.957089
611	DG(18:0_18:2)	0.00364928	-0.0499857	0.0572842	0.89395	0.987429
612	DG(18:0_20:4)	0.0287893	-0.0337402	0.0913188	0.367157	0.911808
613	DG(18:0_22:6)	0.0233121	-0.0457449	0.0923691	0.508416	0.949441
614	DG(18:1_18:1)	-0.0295598	-0.0764168	0.0172971	0.216706	0.802312
615	DG(18:1_18:2)	-0.00587865	-0.0607679	0.0490106	0.833795	0.986498
616	DG(18:1_18:3)	0.0183051	-0.0351156	0.0717257	0.502057	0.949441
617	DG(18:1_20:3)	0.0658719	0.00815454	0.123589	0.0256114	0.58666
618	DG(18:1_20:4)	0.063922	0.00443729	0.123407	0.035548	0.629597
619	DG(18:1_20:5)	0.0767939	0.0184625	0.135125	0.0100759	0.551987
620	DG(18:1_22:5)	0.063354	0.00729674	0.119411	0.0270783	0.601466
621	DG(18:1_22:6)	0.0487923	-0.012944	0.110529	0.121828	0.802312
622	DG(18:2_18:2)	-0.00589876	-0.0695526	0.0577551	0.855925	0.986498
623	DG(18:2_20:4)	0.0431159	-0.0219592	0.108191	0.194513	0.802312
624	DG(18:2_22:6)	0.0400695	-0.0237245	0.103864	0.218709	0.802312
625	TG(48:0) [NL-16:0]	0.0153933	-0.0445949	0.0753816	0.615162	0.977557
626	TG(48:0) [NL-18:0]	0.0182191	-0.043351	0.0797893	0.562118	0.957089
627	TG(48:1) [NL-16:1]	0.0333084	-0.0320753	0.0986922	0.318397	0.909234
628	TG(48:1) [NL-18:1]	0.00723298	-0.048946	0.063412	0.800848	0.985606
629	TG(48:2) [NL-14:0]	0.0243157	-0.0255165	0.0741478	0.339214	0.909234
630	TG(48:2) [NL-14:1]	0.0269447	-0.0297588	0.0836482	0.351992	0.909234
631	TG(48:2) [NL-16:1]	0.0443153	-0.018357	0.106988	0.166225	0.802312
632	TG(48:2) [NL-18:2]	0.0144099	-0.0364173	0.0652371	0.578614	0.968334
633	TG(48:3) [NL-14:0]	0.0329955	-0.0130549	0.0790458	0.160664	0.802312
634	TG(48:3) [NL-16:1]	0.0439515	-0.00885081	0.0967538	0.103251	0.802312
635	TG(48:3) [NL-18:3]	0.017734	-0.0317223	0.0671903	0.482408	0.949441
636	TG(49:1) [NL-16:1]	0.0312332	-0.0367139	0.0991802	0.367929	0.911808
637	TG(49:1) [NL-17:1]	0.0231136	-0.040763	0.0869903	0.478427	0.949441
638	TG(50:0) [NL-18:0]	-0.00919392	-0.0637305	0.0453426	0.741182	0.985606
639	TG(50:1) [NL-14:0]	0.0259948	-0.0334133	0.0854029	0.391399	0.911808
640	TG(50:1) [NL-16:0]	-0.03643	-0.0939064	0.0210465	0.214551	0.802312
641	TG(50:1) [NL-18:1]	-0.0131806	-0.071814	0.0454527	0.659639	0.977557
642	TG(50:2) [NL-14:0]	0.0443247	-0.0114298	0.100079	0.119647	0.802312
643	TG(50:2) [NL-16:1]	0.0223853	-0.0414572	0.0862277	0.492163	0.949441
644	TG(50:2) [NL-18:1]	0.0112443	-0.0467498	0.0692384	0.70405	0.977557
645	TG(50:2) [NL-18:2]	-0.0509988	-0.111067	0.00906916	0.0965526	0.795203
646	TG(50:3) [NL-14:0]	0.0200723	-0.0299717	0.0701163	0.432054	0.932659
647	TG(50:3) [NL-14:1]	-0.0140905	-0.067049	0.0388679	0.602192	0.975659
648	TG(50:3) [NL-16:1]	0.0568428	-0.00103719	0.114723	0.0546567	0.642114
649	TG(50:3) [NL-18:2]	0.0342516	-0.0126409	0.0811441	0.152702	0.802312
650	TG(50:3) [NL-18:3]	-0.00500319	-0.057915	0.0479086	0.853023	0.986498
651	TG(50:4) [NL-14:0]	0.0211176	-0.0286964	0.0709317	0.406317	0.926248
652	TG(50:4) [NL-18:3]	0.0307297	-0.0132935	0.0747528	0.171713	0.802312
653	TG(50:4) [NL-20:4]	0.0461458	-0.00785384	0.100145	0.0944018	0.795203
654	TG(51:0) [NL-16:0]	0.00746049	-0.0482529	0.0631739	0.793045	0.985606
655	TG(51:1) [NL-17:0]	-0.0150734	-0.0718471	0.0417002	0.602965	0.975659
656	TG(51:2) [NL-15:0]	-0.0263571	-0.0836596	0.0309453	0.367621	0.911808
657	TG(51:2) [NL-17:0]	-0.00813998	-0.0676155	0.0513356	0.788587	0.985606
658	TG(51:2) [NL-17:1]	-0.00810004	-0.0675778	0.0513777	0.789607	0.985606
659	TG(52:1) [NL-18:0]	-0.00630136	-0.0546687	0.042066	0.798528	0.985606
660	TG(52:1) [NL-18:1]	-0.00312108	-0.0516004	0.0453582	0.899623	0.987429
661	TG(52:2) [NL-16:0]	-0.00987003	-0.0703937	0.0506536	0.749345	0.985606
662	TG(52:2) [NL-18:2]	0.0092933	-0.0469771	0.0655637	0.746262	0.985606
663	TG(52:3) [NL-16:1]	0.0379749	-0.0250363	0.100986	0.237919	0.826515
664	TG(52:3) [NL-18:2]	-0.020247	-0.0839486	0.0434546	0.533512	0.949441
665	TG(52:4) [NL-16:1]	0.00962062	-0.0453718	0.064613	0.731785	0.985606
666	TG(52:4) [NL-18:2]	0.00358939	-0.0596807	0.0668595	0.911495	0.987429
667	TG(52:4) [NL-18:3]	0.00277723	-0.0476272	0.0531816	0.914032	0.987429
668	TG(52:5) [NL-18:3]	0.0271649	-0.0262795	0.0806094	0.319486	0.909234
669	TG(52:5) [NL-20:4]	0.0753693	0.0210472	0.129691	0.00670492	0.551987
670	TG(52:5) [NL-20:5]	0.0399638	-0.0214157	0.101343	0.202335	0.802312
671	TG(53:2) [NL-17:1]	-0.0025481	-0.057572	0.0524758	0.927705	0.987429
672	TG(53:2) [NL-18:1]	-0.00277664	-0.0557002	0.0501469	0.918127	0.987429
673	TG(54:0) [NL-18:0]	0.0181331	-0.0367351	0.0730013	0.517362	0.949441
674	TG(54:1) [NL-18:1]	-0.0005151	-0.0485047	0.0474745	0.983222	0.997272
675	TG(54:2) [NL-18:0]	-0.0203377	-0.0685006	0.0278251	0.408156	0.926248
676	TG(54:2) [NL-20:1]	-0.0546839	-0.101707	-0.00766121	0.0229526	0.580146
677	TG(54:3) [NL-18:1]	-0.0440507	-0.107618	0.0195164	0.174833	0.802312
678	TG(54:3) [NL-18:2]	-0.0286165	-0.0868151	0.029582	0.335514	0.909234
679	TG(54:4) [NL-18:2]	-0.0222917	-0.086056	0.0414726	0.493444	0.949441
680	TG(54:4) [NL-20:3]	0.0698698	0.00896094	0.130779	0.0248692	0.58666
681	TG(54:5) [NL-18:3]	-0.0185467	-0.0772671	0.0401736	0.536079	0.949441
682	TG(54:5) [NL-20:4]	0.0481428	-0.0163821	0.112668	0.144094	0.802312
683	TG(54:6) [NL-18:3]	-0.0081785	-0.0680912	0.0517342	0.789123	0.985606
684	TG(54:6) [NL-20:4]	0.0347231	-0.0306539	0.1001	0.298243	0.909234
685	TG(54:6) [NL-20:5]	0.0322632	-0.0311703	0.0956967	0.319171	0.909234
686	TG(54:6) [NL-22:6]	0.0250257	-0.0373624	0.0874138	0.432012	0.932659
687	TG(54:7) [NL-20:5]	0.0514271	-0.00316975	0.106024	0.0652915	0.686564
688	TG(54:7) [NL-22:6]	0.0544773	-0.00131605	0.110271	0.0560645	0.642114
689	TG(56:6) [NL-20:4]	0.0327265	-0.0358222	0.101275	0.349734	0.909234
690	TG(56:6) [NL-22:5](a)	0.0416943	-0.0232147	0.106603	0.208456	0.802312
691	TG(56:6) [NL-22:5](b)	0.0420383	-0.0227514	0.106828	0.203898	0.802312
692	TG(56:7) [NL-20:4]	0.0216556	-0.047131	0.0904423	0.537404	0.949441
693	TG(56:7) [NL-20:5]	0.0505627	-0.0154305	0.116556	0.13363	0.802312
694	TG(56:7) [NL-22:5](a)	0.0603509	-0.00443396	0.125136	0.0683054	0.686564
695	TG(56:7) [NL-22:5](b)	0.060678	-0.00408658	0.125442	0.0667408	0.686564
696	TG(56:7) [NL-22:6]	0.0292187	-0.0328922	0.0913296	0.356832	0.909234
697	TG(56:8) [NL-20:4]	0.0320441	-0.033944	0.0980321	0.341541	0.909234
698	TG(56:8) [NL-20:5]	0.0432256	-0.01796	0.104411	0.166601	0.802312
699	TG(56:8) [NL-22:6]	0.0307823	-0.0316109	0.0931755	0.333891	0.909234
700	TG(56:9) [NL-22:6]	0.0419555	-0.0175332	0.101444	0.16732	0.802312
701	TG(58:10) [NL-22:6]	0.0223061	-0.0412042	0.0858165	0.491438	0.949441
702	TG(58:8) [NL-22:6]	0.00958216	-0.0550456	0.0742099	0.771442	0.985606
703	TG(58:9) [NL-22:6]	0.0136811	-0.0513461	0.0787084	0.6802	0.977557
704	TG(O-50:1) [NL-15:0]	-0.0433042	-0.101782	0.015174	0.14712	0.802312
705	TG(O-50:1) [NL-16:0]	-0.0274494	-0.0884605	0.0335617	0.378183	0.911808
706	TG(O-50:1) [NL-17:1]	-0.0178568	-0.0793884	0.0436747	0.569675	0.964369
707	TG(O-50:1) [NL-18:1]	-0.028153	-0.0852359	0.0289299	0.334053	0.909234
708	TG(O-50:2) [NL-16:1]	0.000325065	-0.0648733	0.0655234	0.992206	0.997272
709	TG(O-50:2) [NL-18:1]	0.00244346	-0.0555835	0.0604705	0.934246	0.987429
710	TG(O-50:2) [NL-18:2]	-0.0421058	-0.10808	0.0238687	0.211397	0.802312
711	TG(O-50:3) [NL-18:2]	-0.0234398	-0.0897592	0.0428796	0.488707	0.949441
712	TG(O-52:0) [NL-16:0]	-0.0189117	-0.0797068	0.0418834	0.54226	0.949441
713	TG(O-52:1) [NL-16:0]	-0.0215122	-0.0782616	0.0352372	0.457745	0.94418
714	TG(O-52:1) [NL-18:1]	-0.0107058	-0.0628027	0.0413912	0.687239	0.977557
715	TG(O-52:2) [NL-16:0]	-0.0139529	-0.0702452	0.0423393	0.627251	0.977557
716	TG(O-52:2) [NL-17:1]	-0.00601891	-0.0626623	0.0506245	0.835081	0.986498
717	TG(O-52:2) [NL-18:1]	-0.016329	-0.0710154	0.0383575	0.558577	0.957089
718	TG(O-54:2) [NL-17:1]	0.0121802	-0.0404933	0.0648537	0.650526	0.977557
719	TG(O-54:2) [NL-18:1]	-0.0157253	-0.0661849	0.0347343	0.541523	0.949441
720	TG(O-54:3) [NL-17:1]	-0.0358852	-0.0935877	0.0218172	0.22329	0.802312
721	TG(O-54:3) [NL-18:1]	-0.0158449	-0.0691782	0.0374884	0.560555	0.957089
722	TG(O-54:4) [NL-17:1]	0.00755079	-0.0542082	0.0693098	0.810685	0.985606
723	TG(O-54:4) [NL-18:2]	-0.0170955	-0.0790358	0.0448448	0.588711	0.975659
724	Ubiquinone	-0.0197687	-0.083534	0.0439966	0.543624	0.949441
725	CE(18:2) [+OH]	-0.0313687	-0.0973827	0.0346453	0.351996	0.909234
726	CE(20:4) [+OH]	0.0726085	0.0165856	0.128631	0.0112958	0.551987
727	CE(22:6) [+OH]	0.00790804	-0.0514857	0.0673018	0.794197	0.985606
728	LPC(18:2) [+OH]	-0.0258182	-0.0903032	0.0386669	0.43288	0.932659
729	LPC(20:4) [+OH]	-0.000361359	-0.0668153	0.0660926	0.991499	0.997272
730	LPC(22:6) [+OH]	-0.0219431	-0.0876619	0.0437756	0.513051	0.949441
731	PC(34:2) [+OH]	-0.00396787	-0.0690936	0.0611578	0.904981	0.987429
732	PC(36:4) [+OH]	-0.0128683	-0.0707875	0.0450508	0.663359	0.977557
733	PC(38:6) [+OH]	0.0219657	-0.039026	0.0829574	0.480502	0.949441

## Sheet: Supp 6
Supp 6. Linear regression between infant 48-month lipidome and infant 48-month BMI z score
#	Lipid	Beta	LCI	UCI	p value	BH p value
1	Sph(d16:1)	0.0393214	-0.0553145	0.133957	0.415858	0.803457
2	Sph(d18:1)	0.0566597	-0.0381223	0.151442	0.241953	0.669407
3	Sph(d18:2)	0.0117172	-0.0817822	0.105217	0.806085	0.95454
4	S1P(d16:1)	0.0803367	-0.0116228	0.172296	0.087538	0.46836
5	S1P(d18:0)	0.0299198	-0.0642564	0.124096	0.533804	0.857221
6	S1P(d18:1)	0.0643348	-0.0303602	0.15903	0.183667	0.611946
7	S1P(d18:2)	0.113617	0.0193433	0.207891	0.0185958	0.229607
8	Cer(d18:0/16:0)	0.000788165	-0.0789829	0.0805592	0.984558	0.996456
9	Cer(d18:0/18:0)	0.0360433	-0.0543512	0.126438	0.434911	0.811933
10	Cer(d18:0/20:0)	-0.00729781	-0.0968494	0.0822537	0.873169	0.975689
11	Cer(d18:0/22:0)	0.0203355	-0.0665123	0.107183	0.646503	0.912994
12	Cer(d18:0/24:0)	-0.0144046	-0.102244	0.0734347	0.748044	0.945915
13	Cer(d18:0/24:1)	0.0200806	-0.0688344	0.108996	0.658234	0.919114
14	Cer(d16:1/16:0)	0.0272849	-0.0595819	0.114152	0.538447	0.857221
15	Cer(d16:1/18:0)	0.0733481	-0.0142594	0.160956	0.101503	0.492728
16	Cer(d16:1/20:0)	0.0311664	-0.0554853	0.117818	0.4812	0.833853
17	Cer(d16:1/22:0)	0.0223977	-0.0633496	0.108145	0.608929	0.89269
18	Cer(d16:1/23:0)	-0.0400659	-0.123457	0.0433252	0.346855	0.753851
19	Cer(d16:1/24:0)	-0.000267071	-0.0855988	0.0850647	0.995108	0.996456
20	Cer(d16:1/24:1)	0.0324157	-0.0531735	0.118005	0.458281	0.818779
21	Cer(d17:1/16:0)	0.0332086	-0.055348	0.121765	0.462725	0.81927
22	Cer(d17:1/18:0)	-0.0157317	-0.105428	0.0739648	0.731187	0.939077
23	Cer(d17:1/20:0)	0.0222674	-0.067377	0.111912	0.626597	0.904722
24	Cer(d17:1/22:0)	-0.0174364	-0.104549	0.0696763	0.695014	0.927416
25	Cer(d17:1/23:0)	-0.061273	-0.146133	0.0235874	0.157702	0.58037
26	Cer(d17:1/24:0)	-0.0485136	-0.133552	0.0365245	0.264095	0.678632
27	Cer(d17:1/24:1)	-0.0183087	-0.101916	0.0652989	0.667978	0.919804
28	Cer(d18:1/14:0)	0.00915511	-0.0795049	0.0978151	0.839703	0.966555
29	Cer(d18:1/16:0)	-0.0177734	-0.101119	0.0655722	0.67617	0.924367
30	Cer(d18:1/17:0)	-0.0038339	-0.0977176	0.0900498	0.936241	0.991033
31	Cer(d18:1/18:0)	0.0198657	-0.067352	0.107083	0.6555	0.918703
32	Cer(d18:1/19:0)	0.0105569	-0.0778786	0.0989923	0.815113	0.962122
33	Cer(d18:1/20:0)	0.00262268	-0.0851371	0.0903825	0.953317	0.992792
34	Cer(d18:1/21:0)	0.0180219	-0.0678481	0.103892	0.68101	0.927416
35	Cer(d18:1/22:0)	-0.0166476	-0.101099	0.0678034	0.699407	0.927416
36	Cer(d18:1/23:0)	-0.0766255	-0.15358	0.000329223	0.0516067	0.382684
37	Cer(d18:1/24:0)	-0.0613387	-0.143056	0.020378	0.141932	0.562357
38	Cer(d18:1/24:1)	-0.00947442	-0.0931923	0.0742435	0.824559	0.962693
39	Cer(d18:1/26:0)	-0.0568956	-0.144296	0.0305044	0.202645	0.630856
40	Cer(d18:2/14:0)	0.0501819	-0.0358763	0.13624	0.253687	0.669407
41	Cer(d18:2/16:0)	0.0500436	-0.0352193	0.135307	0.250598	0.669407
42	Cer(d18:2/17:0)	0.0182624	-0.0761842	0.112709	0.704875	0.928152
43	Cer(d18:2/18:0)	0.0121436	-0.0755918	0.099879	0.786295	0.94881
44	Cer(d18:2/20:0)	0.0237492	-0.063494	0.110992	0.593919	0.886645
45	Cer(d18:2/21:0)	0.0158577	-0.0714008	0.103116	0.721861	0.934849
46	Cer(d18:2/22:0)	-0.0136331	-0.0987799	0.0715138	0.753803	0.945915
47	Cer(d18:2/23:0)	-0.0759778	-0.15651	0.00455451	0.0650944	0.414906
48	Cer(d18:2/24:0)	-0.0476073	-0.131559	0.0363439	0.266957	0.678632
49	Cer(d18:2/24:1)	0.00571388	-0.0770847	0.0885125	0.892468	0.977821
50	Cer(d18:2/26:0)	-0.0580411	-0.141622	0.0255398	0.174172	0.591192
51	Cer(d19:1/16:0)	-0.0519313	-0.138113	0.0342499	0.238205	0.669407
52	Cer(d19:1/18:0)	0.0226014	-0.0668249	0.112028	0.620584	0.904351
53	Cer(d19:1/20:0)	0.0500315	-0.0396471	0.13971	0.274771	0.686028
54	Cer(d19:1/22:0)	-0.00307726	-0.0891172	0.0829627	0.944145	0.991033
55	Cer(d19:1/23:0)	-0.0016159	-0.0872998	0.084068	0.970531	0.995322
56	Cer(d19:1/24:0)	0.000541574	-0.0849926	0.0860757	0.990104	0.996456
57	Cer(d19:1/24:1)	0.0214266	-0.0649364	0.10779	0.627011	0.904722
58	Cer(d19:1/26:0)	-0.00873602	-0.100794	0.0833216	0.85253	0.969045
59	Cer(d20:1/22:0)	0.0127413	-0.0761709	0.101653	0.778939	0.946869
60	Cer(d20:1/23:0)	-0.0263717	-0.113315	0.0605717	0.552472	0.867156
61	Cer(d20:1/24:0)	-0.0580052	-0.146609	0.0305981	0.200108	0.630856
62	Cer(d20:1/24:1)	0.0314774	-0.0584187	0.121373	0.492879	0.835745
63	Cer(d20:1/26:0)	0.00202113	-0.0898991	0.0939414	0.965644	0.995322
64	Cer(m18:0/20:0)	-0.0532	-0.136205	0.0298046	0.209691	0.640431
65	Cer(m18:0/22:0)	-0.051043	-0.130131	0.0280453	0.20654	0.638792
66	Cer(m18:0/23:0)	-0.0865448	-0.162689	-0.0104007	0.0263951	0.276394
67	Cer(m18:0/24:0)	-0.0891972	-0.167894	-0.0105007	0.0268143	0.276829
68	Cer(m18:0/24:1)	-0.0466331	-0.127038	0.0337713	0.256244	0.669407
69	Cer(m18:1/18:0)	-0.107162	-0.191131	-0.0231932	0.012727	0.205746
70	Cer(m18:1/20:0)	-0.0504871	-0.129686	0.0287117	0.212154	0.644322
71	Cer(m18:1/22:0)	-0.0696931	-0.150291	0.0109049	0.0908062	0.482326
72	Cer(m18:1/23:0)	-0.112043	-0.188637	-0.0354483	0.00433787	0.149122
73	Cer(m18:1/24:0)	-0.112913	-0.191967	-0.0338585	0.00533996	0.149122
74	Cer(m18:1/24:1)	-0.0701623	-0.1504	0.0100754	0.0872417	0.46836
75	Cer1P(d18:1/16:0)	-0.0130871	-0.0974498	0.0712757	0.76123	0.945915
76	HexCer(d16:1/18:0)	-0.0360956	-0.128551	0.0563596	0.444552	0.811933
77	HexCer(d16:1/20:0)	0.0348886	-0.0534216	0.123199	0.439142	0.811933
78	HexCer(d16:1/22:0)	0.0172569	-0.0721979	0.106712	0.705529	0.928152
79	HexCer(d16:1/24:0)	0.0183362	-0.0703922	0.107065	0.685638	0.927416
80	HexCer(d18:1/16:0)	-0.00365874	-0.0871074	0.0797899	0.931557	0.991033
81	HexCer(d18:1/18:0)	-0.0433171	-0.133469	0.0468352	0.346825	0.753851
82	HexCer(d18:1/20:0)	0.0182255	-0.0707886	0.10724	0.688385	0.927416
83	HexCer(d18:1/22:0)	-0.0133079	-0.10329	0.0766739	0.772046	0.945915
84	HexCer(d18:1/24:0)	-0.0354874	-0.125184	0.0542088	0.43848	0.811933
85	HexCer(d18:1/24:1)	0.0186177	-0.0716934	0.108929	0.686365	0.927416
86	HexCer(d18:2/18:0)	-0.0384416	-0.129874	0.0529905	0.410344	0.802086
87	HexCer(d18:2/20:0)	-0.0063852	-0.0971492	0.0843788	0.890393	0.977821
88	HexCer(d18:2/22:0)	0.0327489	-0.0590791	0.124577	0.484914	0.835745
89	HexCer(d18:2/24:0)	-0.00333893	-0.095465	0.0887871	0.9434	0.991033
90	Hex2Cer(d16:1/16:0)	0.0776983	-0.0138965	0.169293	0.0970849	0.486301
91	Hex2Cer(d16:1/24:1)	0.109317	0.0175788	0.201055	0.0199539	0.233489
92	Hex2Cer(d18:1/16:0)	0.0265655	-0.0645646	0.117696	0.56804	0.871074
93	Hex2Cer(d18:1/18:0)	-0.00996781	-0.103745	0.0838096	0.835064	0.966555
94	Hex2Cer(d18:1/20:0)	0.097378	0.00496415	0.189792	0.0394708	0.344429
95	Hex2Cer(d18:1/22:0)	0.0571468	-0.0357656	0.150059	0.228639	0.669407
96	Hex2Cer(d18:1/24:0)	0.0479153	-0.0433815	0.139212	0.304191	0.712371
97	Hex2Cer(d18:1/24:1)	0.113357	0.0230437	0.20367	0.0142663	0.214778
98	Hex2Cer(d18:2/16:0)	0.0951905	0.00363122	0.18675	0.0421636	0.347381
99	Hex2Cer(d18:2/24:1)	0.148775	0.0585658	0.238985	0.00131783	0.0804973
100	Hex3Cer(d18:1/16:0)	0.000981854	-0.0829493	0.084913	0.981717	0.996456
101	Hex3Cer(d18:1/18:0)	0.0429367	-0.0440791	0.129953	0.333999	0.739642
102	Hex3Cer(d18:1/20:0)	-0.0430992	-0.127351	0.0411527	0.316575	0.727429
103	Hex3Cer(d18:1/22:0)	-0.022348	-0.106421	0.0617253	0.602625	0.888781
104	Hex3Cer(d18:1/24:0)	-0.0431899	-0.127514	0.0411338	0.315971	0.727429
105	Hex3Cer(d18:1/24:1)	0.0162622	-0.0691905	0.101715	0.709325	0.928152
106	GM3(d18:1/16:0)	-0.0189589	-0.108164	0.0702459	0.677197	0.924367
107	GM3(d18:1/18:0)	-0.00623945	-0.0922189	0.07974	0.886958	0.977821
108	GM3(d18:1/20:0)	-0.00990589	-0.101104	0.0812925	0.831507	0.965996
109	GM3(d18:1/22:0)	-0.00232103	-0.0933413	0.0886993	0.96016	0.995322
110	GM3(d18:1/24:0)	-0.00986639	-0.0971646	0.0774318	0.82479	0.962693
111	GM3(d18:1/24:1)	0.00198029	-0.0901775	0.094138	0.966425	0.995322
112	GM1(d18:1/16:0)	-0.0228936	-0.114951	0.0691636	0.626192	0.904722
113	Sulfatide (d18:1:/16:0(OH))	-0.0876372	-0.169523	-0.00575184	0.0364935	0.332963
114	Sulfatide (d18:1:/16:0)	-0.0476265	-0.133941	0.0386883	0.280064	0.686304
115	Sulfatide (d18:1:/24:0(OH))	0.0653197	-0.025627	0.156266	0.15991	0.58037
116	Sulfatide (d18:1:/24:0)	-0.00879569	-0.0936146	0.0760233	0.839031	0.966555
117	Sulfatide (d18:1:/24:1(OH))	0.0121582	-0.0763784	0.100695	0.787934	0.94881
118	Sulfatide (d18:1:/24:1)	-0.0392271	-0.12804	0.0495861	0.387121	0.7753
119	SM(34:3)	0.07409	-0.00346093	0.151641	0.0617845	0.409377
120	SM(35:2) (b)	-0.0275121	-0.107451	0.0524269	0.500303	0.839181
121	SM(37:1)	0.0119929	-0.0705024	0.0944882	0.775822	0.945915
122	SM(37:2)	0.046943	-0.0336978	0.127584	0.254495	0.669407
123	SM(38:3) (a)	0.172643	0.0842034	0.261083	0.000148668	0.0530333
124	SM(38:3) (b)	0.0567068	-0.0304937	0.143907	0.203113	0.630856
125	SM(40:3) (a)	0.109673	0.0257355	0.193611	0.0107655	0.187883
126	SM(40:3) (b)	0.0371056	-0.0468117	0.121023	0.386598	0.7753
127	SM(41:0)	-0.0721715	-0.157363	0.0130204	0.0975256	0.486301
128	SM(41:1) (a)	0.0295054	-0.0551779	0.114189	0.495021	0.835745
129	SM(43:1)	-0.0107392	-0.0952548	0.0737763	0.803433	0.95294
130	SM(43:2) (b)	-0.0196215	-0.104518	0.0652746	0.650766	0.91557
131	SM(43:2) (c)	-0.0160215	-0.0953917	0.0633487	0.692558	0.927416
132	SM(44:1)	-0.056233	-0.139711	0.0272452	0.187407	0.618062
133	SM(44:2)	0.0241555	-0.0609223	0.109233	0.578155	0.877407
134	SM(44:3)	0.0804033	-0.00718531	0.167992	0.072658	0.422685
135	SM(d16:1/19:0)	-0.0239814	-0.104457	0.056494	0.559465	0.870674
136	SM(d16:1/23:0)/SM(d17:1/22:0)	0.0195834	-0.0596941	0.0988609	0.628505	0.905096
137	SM(d16:1/24:1)	0.104807	0.0207274	0.188887	0.0149436	0.214778
138	SM(d17:1/14:0)	0.0472436	-0.0323549	0.126842	0.245324	0.669407
139	SM(d17:1/16:0)	-0.020873	-0.0982054	0.0564593	0.597046	0.888323
140	SM(d17:1/24:1)	0.0385644	-0.0441927	0.121321	0.36155	0.761541
141	SM(d18:0/14:0)	-0.00440686	-0.0828252	0.0740115	0.912343	0.984816
142	SM(d18:0/16:0)	-0.0644794	-0.151688	0.0227297	0.147993	0.56641
143	SM(d18:0/22:0)	-0.0194231	-0.107909	0.0690626	0.667234	0.919804
144	SM(d18:1/14:0/SM(d16:1/16:0)	0.0424171	-0.0361994	0.121034	0.29085	0.696708
145	SM(d18:1/16:0)	-0.0196384	-0.101532	0.0622551	0.638572	0.910649
146	SM(d18:1/17:0)/SM(d17:1/18:0)	0.0128686	-0.0734787	0.0992158	0.770342	0.945915
147	SM(d18:1/18:0/SM(d16:1/20:0)	0.00598246	-0.0730012	0.0849661	0.882049	0.977821
148	SM(d18:1/20:0)/SM(d16:1/22:0)	0.0607013	-0.0191615	0.140564	0.136997	0.56091
149	SM(d18:1/22:0)/SM(d16:1/24:0)	0.0329808	-0.0478669	0.113829	0.424391	0.808192
150	SM(d18:1/23:0)/SM(d17:1/24:0)	-0.0334086	-0.109499	0.0426817	0.389937	0.778811
151	SM(d18:1/24:0)	-0.00964441	-0.0922173	0.0729285	0.819031	0.962693
152	SM(d18:1/24:1)	0.0625126	-0.0246969	0.149722	0.16073	0.58037
153	SM(d18:2/14:0)	0.132831	0.0564144	0.209248	0.000716167	0.0583279
154	SM(d18:2/16:0)	0.041251	-0.0389055	0.121408	0.313675	0.727429
155	SM(d18:2/17:0)	0.0297067	-0.047825	0.107238	0.453056	0.814938
156	SM(d18:2/18:0)	0.0196038	-0.0621035	0.101311	0.6384	0.910649
157	SM(d18:2/18:1)	0.0534156	-0.0273624	0.134194	0.195616	0.625517
158	SM(d18:2/20:0)	0.0599756	-0.0252929	0.145244	0.168703	0.591192
159	SM(d18:2/22:0)	0.0382962	-0.04287	0.119462	0.35558	0.754957
160	SM(d18:2/23:0)	-0.01722	-0.0947198	0.0602797	0.663408	0.919804
161	SM(d18:2/24:0)	0.00265513	-0.0792589	0.0845691	0.949372	0.99271
162	SM(d19:1/24:1)	0.0824076	-0.00556377	0.170379	0.0670143	0.418145
163	PA(34:1)	0.00182051	-0.0937113	0.0973523	0.970222	0.995322
164	PA(36:1)	0.0449404	-0.0495479	0.139429	0.351729	0.753851
165	PA(36:2)	0.0224378	-0.0723526	0.117228	0.642909	0.912994
166	PA(36:3)	0.0253348	-0.0705341	0.121204	0.604742	0.890113
167	PA(36:4)	0.00702221	-0.0886106	0.102655	0.885628	0.977821
168	PA(40:6)	-0.0665615	-0.162076	0.0289526	0.172663	0.591192
169	PC(14:0_16:0)	-0.0566421	-0.129897	0.0166126	0.130347	0.55724
170	PC(14:0_20:4)	0.0399111	-0.0389864	0.118809	0.321984	0.732964
171	PC(14:0_22:6)	-0.012481	-0.0928561	0.067894	0.760996	0.945915
172	PC(15-MHDA_18:1)	-0.0853401	-0.16678	-0.00389979	0.0405695	0.347381
173	PC(15-MHDA_18:2)	-0.085619	-0.164162	-0.00707603	0.0331734	0.307799
174	PC(15-MHDA_20:4)	-0.00950538	-0.0908952	0.0718845	0.819047	0.962693
175	PC(15-MHDA_22:6)	-0.0652204	-0.150249	0.019808	0.13344	0.56091
176	PC(15:0_20:3)	-0.0111655	-0.0931315	0.0708004	0.789596	0.94881
177	PC(15:0_20:4)	-0.00822071	-0.0900135	0.073572	0.843922	0.966555
178	PC(15:0_22:6)	-0.0726488	-0.155342	0.010044	0.0857714	0.46836
179	PC(16:0_16:0)	-0.0431371	-0.117222	0.030948	0.254381	0.669407
180	PC(16:0_18:0)	-0.0217991	-0.0929902	0.049392	0.548702	0.866275
181	PC(16:0_18:1)	-0.107378	-0.189855	-0.0249012	0.0110492	0.18835
182	PC(16:0_18:2)	-0.0796825	-0.160447	0.00108251	0.0537759	0.386449
183	PC(16:0_18:3) (a)	-0.05657	-0.132515	0.019375	0.145	0.565345
184	PC(16:0_18:3) (b)	-0.0179553	-0.0974764	0.0615658	0.658302	0.919114
185	PC(16:0_20:3) (a)	-0.011275	-0.0872145	0.0646646	0.77118	0.945915
186	PC(16:0_20:3) (b)	-0.00291725	-0.0879467	0.0821122	0.946417	0.991033
187	PC(16:0_20:4)	0.0353978	-0.055055	0.125851	0.44347	0.811933
188	PC(16:0_20:5)	-0.0306825	-0.113384	0.0520188	0.467503	0.82375
189	PC(16:0_22:6)	-0.066799	-0.152183	0.0185855	0.12589	0.55724
190	PC(16:1_18:2)	0.0133316	-0.0622286	0.0888918	0.729643	0.939077
191	PC(16:1_20:4)	0.0534709	-0.0259843	0.132926	0.187836	0.618062
192	PC(16:1_22:6)	-0.0295767	-0.113852	0.0546988	0.491893	0.835745
193	PC(17:0_18:1)	-0.0719862	-0.147557	0.00358495	0.0625515	0.409377
194	PC(17:0_18:2)	-0.112051	-0.189721	-0.0343813	0.00489983	0.149122
195	PC(17:0_20:4)	0.00196531	-0.0824387	0.0863693	0.963619	0.995322
196	PC(17:0_22:6)	-0.0759646	-0.161555	0.0096259	0.0826214	0.45535
197	PC(17:1_18:2)	-0.0437098	-0.117448	0.0300286	0.245924	0.669407
198	PC(18:0_18:1)	-0.0273618	-0.103308	0.0485848	0.480466	0.833853
199	PC(18:0_18:2)	-0.033871	-0.109504	0.0417617	0.380546	0.774834
200	PC(18:0_20:3)	0.0668033	-0.0186604	0.152267	0.126216	0.55724
201	PC(18:0_20:4)	0.0658702	-0.0208912	0.152632	0.13744	0.56091
202	PC(18:0_22:4)	0.0457415	-0.0434281	0.134911	0.315235	0.727429
203	PC(18:0_22:5) (n3)	-0.04784	-0.138747	0.0430674	0.302886	0.711589
204	PC(18:0_22:5) (n6)	0.014637	-0.0754937	0.104768	0.750406	0.945915
205	PC(18:0_22:6)	-0.0277266	-0.114315	0.0588615	0.530575	0.857221
206	PC(18:1_18:1)	-0.0523156	-0.134781	0.0301502	0.214368	0.644322
207	PC(18:1_18:2)	0.000322772	-0.0763042	0.0769497	0.993416	0.996456
208	PC(18:1_20:3)	0.0447983	-0.0399175	0.129514	0.300546	0.708554
209	PC(18:1_22:6) (a)	-0.0192216	-0.108192	0.0697485	0.672171	0.920937
210	PC(18:1_22:6) (b)	-0.0597263	-0.149026	0.0295736	0.190562	0.618062
211	PC(18:2_18:2)	-0.00638127	-0.0805476	0.067785	0.866157	0.973763
212	PC(18:2_20:5)	-0.00554217	-0.0808105	0.0697262	0.885313	0.977821
213	PC(20:0_20:4)	0.0617011	-0.0266777	0.15008	0.171885	0.591192
214	PC(28:0)	-0.0137006	-0.0935025	0.0661014	0.736654	0.939921
215	PC(31:0) (a)	-0.0616908	-0.143843	0.0204613	0.141769	0.562357
216	PC(31:0) (b)	-0.0702714	-0.15311	0.0125676	0.0970829	0.486301
217	PC(32:1)	-0.0400142	-0.122243	0.0422146	0.340712	0.749975
218	PC(32:2)	-0.0261493	-0.101579	0.0492805	0.497188	0.835869
219	PC(33:0) (a)	-0.051735	-0.128989	0.0255185	0.19	0.618062
220	PC(33:0) (b)	-0.0613157	-0.140373	0.0177412	0.129177	0.55724
221	PC(33:1)	-0.0779784	-0.155397	-0.000559865	0.0489758	0.377887
222	PC(33:2)	-0.0784613	-0.153935	-0.00298754	0.0421786	0.347381
223	PC(34:5)	0.000763272	-0.0799534	0.08148	0.985221	0.996456
224	PC(35:5)	-0.0338168	-0.115346	0.0477126	0.416667	0.803457
225	PC(36:6) (a)	0.0121774	-0.06858	0.0929347	0.767713	0.945915
226	PC(38:2)	0.0542542	-0.023933	0.132441	0.174499	0.591192
227	PC(38:4) (b)	0.0109663	-0.0729958	0.0949283	0.798072	0.95004
228	PC(38:5) (a)	-0.00271906	-0.0922348	0.0867967	0.952552	0.992792
229	PC(38:5) (b)	-0.000460355	-0.0834473	0.0825266	0.99133	0.996456
230	PC(38:6) (a)	0.012966	-0.0610599	0.0869918	0.731532	0.939077
231	PC(38:7)(c)	-0.0699831	-0.151448	0.0114815	0.0929247	0.484967
232	PC(39:5)(a)	-0.0667809	-0.152588	0.0190264	0.127865	0.55724
233	PC(39:5)(b)	-0.0474209	-0.13079	0.0359479	0.265506	0.678632
234	PC(40:10)	0.00524614	-0.0887785	0.0992708	0.912967	0.984816
235	PC(40:7) (a)	0.0272812	-0.0529043	0.107467	0.505216	0.844291
236	PC(40:8)	-0.0325701	-0.107068	0.041928	0.391959	0.780482
237	PC(44:12)	-0.0467589	-0.133755	0.0402377	0.292698	0.698853
238	PC(O-16:0/16:0)	-0.0079222	-0.0915054	0.075661	0.852707	0.969045
239	PC(O-16:0/20:3)	0.00168151	-0.0892856	0.0926486	0.971115	0.995322
240	PC(O-16:0/20:4)	0.0329579	-0.0525972	0.118513	0.450622	0.814938
241	PC(O-16:0/22:6)	-0.0470936	-0.133589	0.0394019	0.28648	0.693036
242	PC(O-18:0/18:1)	-0.057244	-0.142655	0.0281666	0.189642	0.618062
243	PC(O-18:0/18:2)	-0.0077961	-0.0937419	0.0781497	0.858968	0.973763
244	PC(O-18:0/20:4)	-0.0112842	-0.0978223	0.075254	0.798396	0.95004
245	PC(O-18:0/22:6)	-0.0635391	-0.149444	0.0223656	0.14784	0.56641
246	PC(O-18:1/18:1)	0.0286565	-0.0574478	0.114761	0.514536	0.851365
247	PC(O-18:1/18:2)	0.0128497	-0.0759627	0.101662	0.776863	0.945915
248	PC(O-32:1)	-0.01976	-0.108459	0.0689391	0.662583	0.919804
249	PC(O-32:2)	-0.0237651	-0.106666	0.0591362	0.574487	0.87365
250	PC(O-34:1)	-0.0176445	-0.106033	0.070744	0.695789	0.927416
251	PC(O-34:2)	-0.0100202	-0.0974163	0.077376	0.822301	0.962693
252	PC(O-34:4)	0.0343459	-0.0507706	0.119462	0.429426	0.810398
253	PC(O-35:4)	0.000343148	-0.0875813	0.0882675	0.9939	0.996456
254	PC(O-36:0)	-0.0451877	-0.134866	0.0444903	0.323872	0.733326
255	PC(O-36:5)	0.00791161	-0.0815671	0.0973903	0.862493	0.973763
256	PC(O-38:5)	0.0401113	-0.050671	0.130894	0.38695	0.7753
257	PC(O-40:5)	-0.0270056	-0.116886	0.0628745	0.556221	0.870322
258	PC(O-40:7) (a)	-0.0130057	-0.102846	0.0768349	0.776742	0.945915
259	PC(O-40:7) (b)	0.0218403	-0.0717715	0.115452	0.64769	0.912994
260	PC(P-15:0/20:4) (a)	0.0298827	-0.0558085	0.115574	0.494643	0.835745
261	PC(P-15:0/20:4) (b)	0.00691236	-0.0807087	0.0945334	0.877188	0.975689
262	PC(P-16:0/14:0)	-0.044438	-0.124471	0.0355953	0.277057	0.686304
263	PC(P-16:0/16:0)	-0.0331933	-0.115026	0.0486392	0.42702	0.810194
264	PC(P-16:0/16:1)	0.0102907	-0.0662105	0.0867919	0.792169	0.949634
265	PC(P-16:0/18:0)	-0.0429445	-0.122092	0.0362033	0.288143	0.694765
266	PC(P-16:0/18:1)	-0.00554592	-0.0790471	0.0679553	0.882497	0.977821
267	PC(P-16:0/18:2)	0.0202316	-0.0517896	0.0922529	0.582191	0.879889
268	PC(P-16:0/18:3)	0.0422872	-0.0420302	0.126605	0.326145	0.733326
269	PC(P-16:0/20:4)	0.015315	-0.0654617	0.0960918	0.710359	0.928152
270	PC(P-16:0/20:5)	-0.0115966	-0.0956716	0.0724783	0.787018	0.94881
271	PC(P-16:0/22:6)	-0.04616	-0.12821	0.0358897	0.270764	0.682551
272	PC(P-17:0/20:4) (a)	0.0240664	-0.0590486	0.107181	0.570639	0.873233
273	PC(P-17:0/20:4) (b)	0.000369044	-0.0846318	0.0853699	0.993214	0.996456
274	PC(P-18:0/18:2)	-0.0167917	-0.0939537	0.0603704	0.669929	0.919804
275	PC(P-18:0/20:4)	-0.011592	-0.0942818	0.0710978	0.783623	0.94881
276	PC(P-18:0/22:5)	-0.0463118	-0.129953	0.0373297	0.278399	0.686304
277	PC(P-18:0/22:6)	-0.0595825	-0.144267	0.025102	0.168576	0.591192
278	PC(P-18:1/18:1)	0.0427856	-0.0362979	0.121869	0.289536	0.695836
279	PC(P-18:1/22:6)	-0.0119855	-0.0921832	0.0682121	0.769718	0.945915
280	PC(P-20:0/20:4)	-0.0509062	-0.138777	0.0369643	0.256777	0.669407
281	PC(P-35:2)(a)	0.0504105	-0.0335237	0.134345	0.239754	0.669407
282	PC(P-35:2)(b)	0.0552272	-0.0292404	0.139695	0.200681	0.630856
283	PC(P-36:3)	0.0368351	-0.0435423	0.117213	0.369549	0.769544
284	PC(P-38:5) (a)	0.0241864	-0.0565456	0.104918	0.557369	0.870322
285	PC(P-38:5) (b)	-0.00347603	-0.0829877	0.0760356	0.931754	0.991033
286	LPC(14:0) [sn1]	0.0403692	-0.0419447	0.122683	0.336949	0.743926
287	LPC(14:0) [sn2]	0.0397859	-0.0426456	0.122217	0.344658	0.753851
288	LPC(15-MHDA) [sn1] [104_sn1]	-0.0147942	-0.101193	0.0716043	0.737319	0.939921
289	LPC(15-MHDA) [sn1] / LPC(17:0) [sn2]	-0.00892339	-0.0961375	0.0782908	0.84115	0.966555
290	LPC(15-MHDA) [sn2]	-0.0173787	-0.10362	0.0688628	0.693058	0.927416
291	LPC(15:0) [sn1]	-0.00294154	-0.0881929	0.0823099	0.946112	0.991033
292	LPC(15:0) [sn2]	-0.0153885	-0.0997301	0.0689532	0.720804	0.934849
293	LPC(16:0) [sn1]	-0.00723554	-0.0973738	0.0829027	0.875054	0.975689
294	LPC(16:0) [sn2]	0.00738028	-0.0822853	0.0970458	0.87191	0.975689
295	LPC(16:1) [sn1]	0.0490262	-0.0370236	0.135076	0.264723	0.678632
296	LPC(16:1) [sn2]	0.067843	-0.0175104	0.153196	0.119962	0.553034
297	LPC(17:0) [sn1]	-0.0257027	-0.11381	0.0624044	0.567762	0.871074
298	LPC(17:1) (a) [sn1] [104_sn1]	0.0153797	-0.0687125	0.099472	0.720163	0.934849
299	LPC(17:1) [sn1] (a) / LPC(17:1) [sn2] (b)	0.00372384	-0.0800089	0.0874566	0.930578	0.991033
300	LPC(17:1) [sn1] (b)	-0.0509872	-0.133958	0.0319832	0.229046	0.669407
301	LPC(17:1) [sn2] (a)	0.0266022	-0.0555934	0.108798	0.52618	0.857088
302	LPC(18:0) [sn1]	-0.00705851	-0.0960262	0.0819092	0.876495	0.975689
303	LPC(18:0) [sn2]	-0.00098899	-0.0904059	0.0884279	0.982714	0.996456
304	LPC(18:1) [sn1]	0.0263526	-0.0592193	0.111925	0.546416	0.86506
305	LPC(18:1) [sn2]	0.0319512	-0.0529145	0.116817	0.460947	0.81927
306	LPC(18:2) [sn1]	0.0637195	-0.0171647	0.144604	0.123279	0.55724
307	LPC(18:2) [sn2]	0.0604292	-0.0200083	0.140867	0.141598	0.562357
308	LPC(18:3) (a) [sn1] [104_sn1]	0.0486306	-0.0330476	0.130309	0.243843	0.669407
309	LPC(18:3) [sn1] (a)/LPC(18:3) [sn2] (b)	0.0514068	-0.0296464	0.13246	0.214481	0.644322
310	LPC(18:3) [sn1] (b)	0.0624689	-0.0180532	0.142991	0.129074	0.55724
311	LPC(18:3) [sn2] (a)	0.0589175	-0.021963	0.139798	0.154057	0.579095
312	LPC(19:0) (a) [sn1] [104_sn1]	-0.000828962	-0.0900815	0.0884235	0.985484	0.996456
313	LPC(19:0) [sn1] (a) / LPC(19:0) [sn2] (b)	0.00334017	-0.083474	0.0901543	0.939922	0.991033
314	LPC(19:0) [sn1] (b)	-0.00936513	-0.0956199	0.0768896	0.831574	0.965996
315	LPC(19:0) [sn2] (a)	0.0101856	-0.0795182	0.0998894	0.823985	0.962693
316	LPC(19:1) (a)	0.0347636	-0.052793	0.12232	0.436861	0.811933
317	LPC(19:1) (b)	-0.0100607	-0.0978534	0.0777319	0.822386	0.962693
318	LPC(19:1) (c)	-0.047898	-0.132469	0.0366733	0.267564	0.678632
319	LPC(20:0) [sn1]	-0.0253798	-0.117742	0.0669826	0.590446	0.886597
320	LPC(20:0) [sn2]	-0.032784	-0.12499	0.0594225	0.486241	0.835745
321	LPC(20:1) [sn1]	0.0341162	-0.0591222	0.127355	0.473643	0.830575
322	LPC(20:1) [sn2]	0.0464469	-0.0474246	0.140318	0.332673	0.739642
323	LPC(20:2) [sn1]	0.0903833	0.00388406	0.176883	0.0411415	0.347381
324	LPC(20:2) [sn2]	0.0794734	-0.00613267	0.165079	0.0694889	0.41939
325	LPC(20:3) [sn1]	0.123374	0.0403921	0.206356	0.00374644	0.149122
326	LPC(20:3) [sn2]	0.117388	0.0345704	0.200205	0.00569633	0.149122
327	LPC(20:4) [sn1]	0.104486	0.0162091	0.192764	0.0207956	0.233489
328	LPC(20:4) [sn2]	0.126024	0.0391891	0.21286	0.00465107	0.149122
329	LPC(20:5) [sn1]	0.0370175	-0.0480138	0.122049	0.393968	0.780482
330	LPC(20:5) [sn2]	0.0271843	-0.0576741	0.112043	0.5304	0.857221
331	LPC(22:0) [sn1]	-0.00042329	-0.0895661	0.0887195	0.992578	0.996456
332	LPC(22:0) [sn2]	0.00395346	-0.0846558	0.0925627	0.930354	0.991033
333	LPC(22:1) [sn1]	-0.0532091	-0.1447	0.0382814	0.254938	0.669407
334	LPC(22:1) [sn2]	-0.00937858	-0.102462	0.083705	0.843543	0.966555
335	LPC(22:4) [sn1]	0.0834037	-0.00813767	0.174945	0.0748138	0.425105
336	LPC(22:4) [sn2]	0.0820355	-0.00752855	0.1716	0.0732882	0.422994
337	LPC(22:5) (n3) [sn1] [104_sn1]	0.0246974	-0.0626141	0.112009	0.579571	0.877739
338	LPC(22:5) [sn1] (n3)/LPC(22:5) [sn2] (n6)	0.0314672	-0.0554707	0.118405	0.478432	0.833853
339	LPC(22:5) [sn1] (n6)	0.0475869	-0.0433604	0.138534	0.30566	0.713532
340	LPC(22:5) [sn2] (n3)	0.0190806	-0.0682009	0.106362	0.668511	0.919804
341	LPC(22:6) [sn1]	0.0153891	-0.0711656	0.101944	0.727643	0.939077
342	LPC(22:6) [sn2]	0.00611907	-0.0813961	0.0936342	0.891058	0.977821
343	LPC(24:0) [sn1]	-0.0403362	-0.126156	0.0454832	0.357429	0.75503
344	LPC(24:0) [sn2]	-0.0312227	-0.116937	0.0544915	0.475624	0.832058
345	LPC(26:0) [sn1]	-0.0962927	-0.178735	-0.01385	0.022528	0.246463
346	LPC(26:0) [sn2]	-0.0764564	-0.158165	0.00525176	0.0673139	0.418145
347	LPC(O-16:0)	0.0147381	-0.080334	0.10981	0.76139	0.945915
348	LPC(O-18:0)	-0.0319905	-0.126914	0.0629334	0.509244	0.844516
349	LPC(O-18:1)	0.0433548	-0.0522275	0.138937	0.374465	0.774834
350	LPC(O-20:0)	-0.0938438	-0.185679	-0.00200868	0.0457932	0.360929
351	LPC(O-20:1)	-0.0125462	-0.107141	0.0820485	0.795017	0.95004
352	LPC(O-22:0)	-0.126908	-0.21452	-0.039297	0.00472939	0.149122
353	LPC(O-22:1)	-0.0383312	-0.130988	0.0543256	0.417892	0.803457
354	LPC(O-24:0)	-0.121082	-0.206316	-0.0358475	0.005591	0.149122
355	LPC(O-24:1)	-0.0524601	-0.142913	0.0379931	0.256255	0.669407
356	LPC(O-24:2)	-0.0327733	-0.126028	0.0604818	0.491295	0.835745
357	LPC(P-16:0)	0.0138166	-0.0803733	0.108006	0.773855	0.945915
358	LPC(P-17:0) (a)	0.0408491	-0.0508371	0.132535	0.382999	0.7753
359	LPC(P-17:0) (b)	0.00538502	-0.0859121	0.0966821	0.908015	0.984816
360	LPC(P-18:0)	-0.00165277	-0.0946838	0.0913782	0.972238	0.995322
361	LPC(P-18:1)	0.0644651	-0.0290756	0.158006	0.177452	0.593938
362	LPC(P-20:0)	-0.041797	-0.134558	0.0509638	0.377627	0.774834
363	PE(15-MHDA_18:1)	-0.0348815	-0.110256	0.0404926	0.36487	0.761964
364	PE(15-MHDA_18:2)	-0.0426328	-0.114277	0.0290116	0.244106	0.669407
365	PE(15-MHDA_20:4)	-0.0858395	-0.167215	-0.00446417	0.0392585	0.344429
366	PE(15-MHDA_22:6)	-0.10373	-0.18742	-0.0200399	0.0155189	0.218757
367	PE(16:0_16:0)	-0.0565842	-0.136034	0.0228654	0.163431	0.58723
368	PE(16:0_16:1)	-0.072705	-0.151303	0.00589345	0.0704954	0.41939
369	PE(16:0_18:1)	-0.0322449	-0.101853	0.0373628	0.364396	0.761964
370	PE(16:0_18:2)	-0.0512949	-0.118559	0.0159691	0.135703	0.56091
371	PE(16:0_18:3) (a)	-0.0422042	-0.117914	0.0335059	0.27516	0.686028
372	PE(16:0_18:3) (b)	-0.0806016	-0.152681	-0.00852188	0.0289132	0.29032
373	PE(16:0_20:3)	-0.0203659	-0.0898992	0.0491674	0.566207	0.871074
374	PE(16:0_20:4)	-0.0788643	-0.158272	0.000543045	0.0522079	0.382684
375	PE(16:0_20:5)	-0.0742642	-0.151882	0.00335372	0.0614	0.409377
376	PE(16:0_22:6)	-0.116774	-0.204659	-0.028889	0.00951267	0.187883
377	PE(16:1_18:2)	-0.00756467	-0.0819151	0.0667858	0.842027	0.966555
378	PE(16:1_20:4)	-0.0155626	-0.0934986	0.0623735	0.695702	0.927416
379	PE(17:0_18:1)	-0.0403136	-0.109633	0.0290056	0.254951	0.669407
380	PE(17:0_18:2)	-0.0570061	-0.124972	0.0109602	0.100892	0.492728
381	PE(17:0_20:4)	-0.0485817	-0.130402	0.0332388	0.245137	0.669407
382	PE(17:0_22:6)	-0.102106	-0.18619	-0.0180215	0.0177264	0.227243
383	PE(18:0_18:1)	0.0423224	-0.0254967	0.110142	0.221922	0.655923
384	PE(18:0_18:2)	-0.0138616	-0.0775919	0.0498688	0.670089	0.919804
385	PE(18:0_20:3) (a)	0.00280442	-0.0697987	0.0754075	0.939685	0.991033
386	PE(18:0_20:3) (b)	-0.00315251	-0.0879354	0.0816304	0.941935	0.991033
387	PE(18:0_20:4)	-0.0479788	-0.130739	0.0347817	0.25645	0.669407
388	PE(18:0_22:4)	-0.0412317	-0.130083	0.0476196	0.363552	0.761964
389	PE(18:0_22:5) (n3)	-0.0857183	-0.167871	-0.00356584	0.0414313	0.347381
390	PE(18:0_22:5) (n6)	-0.0405936	-0.1264	0.045213	0.354301	0.754957
391	PE(18:0_22:6)	-0.0782705	-0.160724	0.00418286	0.06346	0.411648
392	PE(18:1_18:1)	0.0553157	-0.0213971	0.132028	0.15826	0.58037
393	PE(18:1_18:2)	0.0216624	-0.05077	0.0940948	0.558051	0.870322
394	PE(18:1_22:6) (a)	-0.0487853	-0.132281	0.0347106	0.252739	0.669407
395	PE(18:1_22:6) (b)	-0.104096	-0.188406	-0.0197859	0.0159186	0.220157
396	PE(20:0_20:4)	0.00183085	-0.090076	0.0937377	0.968872	0.995322
397	PE(36:0)	0.0138054	-0.0775704	0.105181	0.767273	0.945915
398	PE(38:5) (a)	-0.0690708	-0.147962	0.00982066	0.086851	0.46836
399	PE(38:5) (b)	-0.0828042	-0.158272	-0.00733668	0.0320466	0.301156
400	PE(O-16:0/18:2)	-0.0785427	-0.166185	0.00909995	0.0796875	0.445885
401	PE(O-16:0/20:3)	-0.0735902	-0.161069	0.0138889	0.0998865	0.491388
402	PE(O-16:0/20:4)	-0.0366846	-0.125519	0.0521496	0.418718	0.803457
403	PE(O-16:0/22:4)	-0.0661105	-0.154462	0.0222413	0.143187	0.563671
404	PE(O-16:0/22:6)	-0.128291	-0.213527	-0.0430551	0.00334368	0.149122
405	PE(O-18:0/20:4)	-0.0306066	-0.118069	0.0568562	0.493144	0.835745
406	PE(O-18:0/22:5)	-0.0942674	-0.179498	-0.00903648	0.0306994	0.295022
407	PE(O-18:0/22:6)	-0.0997268	-0.183514	-0.0159392	0.0200974	0.233489
408	PE(O-18:1/18:2)	-0.0569231	-0.146602	0.0327558	0.214114	0.644322
409	PE(O-18:1/22:6)	-0.0678334	-0.156476	0.0208097	0.134351	0.56091
410	PE(O-34:1)	-0.0762641	-0.161904	0.00937637	0.0815993	0.453124
411	PE(O-36:5)	-0.0632022	-0.147797	0.0213929	0.143801	0.563671
412	PE(O-38:5) (a)	-0.0601818	-0.146867	0.0265038	0.174281	0.591192
413	PE(O-38:5) (b)	-0.0702913	-0.152206	0.0116234	0.0932883	0.484967
414	PE(P-15:0/20:4) (a)	-0.0445483	-0.13226	0.0431635	0.320044	0.730818
415	PE(P-15:0/20:4) (b)	-0.0257706	-0.115581	0.0640402	0.574119	0.87365
416	PE(P-15:0/22:6) (a)	-0.056475	-0.144401	0.0314509	0.208718	0.640167
417	PE(P-15:0/22:6) (b)	-0.0715696	-0.160004	0.0168645	0.113394	0.539724
418	PE(P-16:0/18:1)	-0.0525476	-0.142854	0.037759	0.254694	0.669407
419	PE(P-16:0/18:2)	-0.0674776	-0.154607	0.0196516	0.129737	0.55724
420	PE(P-16:0/18:3)	-0.0360668	-0.124499	0.0523653	0.424494	0.808192
421	PE(P-16:0/20:3) (a)	0.012391	-0.0784594	0.103241	0.789343	0.94881
422	PE(P-16:0/20:3) (b)	-0.00217193	-0.094359	0.0900151	0.963189	0.995322
423	PE(P-16:0/20:4)	0.00407203	-0.0876635	0.0958076	0.930709	0.991033
424	PE(P-16:0/20:5)	-0.0627802	-0.149999	0.0244391	0.158997	0.58037
425	PE(P-16:0/22:4)	0.0318791	-0.0598198	0.123578	0.495974	0.835745
426	PE(P-16:0/22:5) (n3)	-0.0866934	-0.173246	-0.000140616	0.050243	0.382114
427	PE(P-16:0/22:5) (n6)	-0.000201294	-0.0889676	0.088565	0.996456	0.996456
428	PE(P-16:0/22:6)	-0.0670027	-0.153724	0.0197185	0.130645	0.55724
429	PE(P-17:0/20:4) (a)	0.0156862	-0.0730929	0.104465	0.729273	0.939077
430	PE(P-17:0/20:4) (b)	-0.0141038	-0.104173	0.0759653	0.759052	0.945915
431	PE(P-17:0/22:6) (a)	-0.0442723	-0.129993	0.0414486	0.311949	0.725901
432	PE(P-17:0/22:6) (b)	-0.0611481	-0.147758	0.0254623	0.167113	0.591192
433	PE(P-18:0/18:1)	-0.066176	-0.154083	0.0217309	0.140786	0.562357
434	PE(P-18:0/18:2)	-0.11551	-0.200236	-0.0307839	0.00781183	0.163602
435	PE(P-18:0/18:3)	-0.0431753	-0.130579	0.0442285	0.333471	0.739642
436	PE(P-18:0/20:3) (a)	-0.0326046	-0.120811	0.0556015	0.46914	0.824651
437	PE(P-18:0/20:3) (b)	-0.0169182	-0.105506	0.0716699	0.708348	0.928152
438	PE(P-18:0/20:4)	0.00751038	-0.0828738	0.0978945	0.870699	0.975689
439	PE(P-18:0/20:5)	-0.0609171	-0.146725	0.0248902	0.164776	0.589176
440	PE(P-18:0/22:4)	-0.0214754	-0.115048	0.0720975	0.653051	0.917024
441	PE(P-18:0/22:5) (n3)	-0.0964848	-0.183676	-0.00929361	0.0306146	0.295022
442	PE(P-18:0/22:5) (n6)	-0.0299133	-0.117948	0.0581217	0.505763	0.844291
443	PE(P-18:0/22:6)	-0.0734659	-0.160407	0.0134748	0.0983769	0.487231
444	PE(P-18:1/18:1)	-0.0215398	-0.110323	0.0672438	0.634651	0.91037
445	PE(P-18:1/18:1) (a)	-0.00459954	-0.0942067	0.0850076	0.919907	0.988698
446	PE(P-18:1/18:1) (b)	-0.063994	-0.152673	0.0246855	0.157939	0.58037
447	PE(P-18:1/18:2) (a)	-0.0339418	-0.121229	0.0533455	0.446372	0.811933
448	PE(P-18:1/18:2) (b)	-0.111949	-0.19731	-0.026588	0.0104773	0.187883
449	PE(P-18:1/18:3)	-0.0275459	-0.11539	0.0602986	0.539125	0.857221
450	PE(P-18:1/20:3) (a)	0.016866	-0.0719981	0.10573	0.71007	0.928152
451	PE(P-18:1/20:3) (b)	-0.00358806	-0.0922511	0.085075	0.936815	0.991033
452	PE(P-18:1/20:4) (a)	0.0499225	-0.0402153	0.14006	0.278267	0.686304
453	PE(P-18:1/20:4) (b)	-0.0228561	-0.112535	0.0668226	0.617645	0.903661
454	PE(P-18:1/20:5) (a)	-0.0370671	-0.12267	0.0485362	0.396502	0.783385
455	PE(P-18:1/20:5) (b)	-0.0729248	-0.160841	0.0149916	0.1047	0.501602
456	PE(P-18:1/22:4)	0.0380884	-0.0509979	0.127175	0.402484	0.79076
457	PE(P-18:1/22:5) (a)	-0.0649282	-0.150967	0.0211108	0.13982	0.562357
458	PE(P-18:1/22:5) (b)	-0.0108489	-0.0995629	0.0778651	0.81068	0.958433
459	PE(P-18:1/22:6) (a)	-0.0286946	-0.118516	0.0611268	0.531537	0.857221
460	PE(P-18:1/22:6) (b)	-0.0895023	-0.177314	-0.0016903	0.0463503	0.361434
461	PE(P-19:0/20:4) (a)	0.0253203	-0.0671856	0.117826	0.591892	0.886597
462	PE(P-19:0/20:4) (b)	-0.00642847	-0.097802	0.0849451	0.890387	0.977821
463	PE(P-20:0/18:1)	-0.0984131	-0.191589	-0.00523751	0.0390085	0.344429
464	PE(P-20:0/18:2)	-0.16369	-0.25312	-0.0742604	0.000370591	0.0543287
465	PE(P-20:0/20:4)	-0.0354712	-0.129913	0.0589705	0.462023	0.81927
466	PE(P-20:0/22:6)	-0.112777	-0.203026	-0.0225278	0.0146974	0.214778
467	PE(P-20:1/20:4)	0.0496282	-0.0442371	0.143493	0.300628	0.708554
468	PE(P-20:1/22:6)	-0.0417123	-0.133827	0.0504028	0.375263	0.774834
469	LPE(16:0) [sn1]	-0.0559202	-0.136211	0.0243702	0.17291	0.591192
470	LPE(16:0) [sn2]	-0.0353684	-0.114047	0.0433105	0.378749	0.774834
471	LPE(17:0) [sn1]	0.0217822	-0.0707677	0.114332	0.644809	0.912994
472	LPE(17:0) [sn2]	0.0239756	-0.0659155	0.113867	0.601394	0.888754
473	LPE(18:0) [sn1]	-0.0127735	-0.097166	0.071619	0.766862	0.945915
474	LPE(18:0) [sn2]	0.0247161	-0.0594755	0.108908	0.565312	0.871074
475	LPE(18:1) [sn1]	0.073421	-0.00477987	0.151622	0.0664003	0.418145
476	LPE(18:1) [sn2]	0.0801503	0.00201154	0.158289	0.0449817	0.360929
477	LPE(18:2) [sn1]	0.0201486	-0.0536194	0.0939167	0.592678	0.886597
478	LPE(18:2) [sn2]	0.0236611	-0.051033	0.0983553	0.534997	0.857221
479	LPE(20:4) [sn1]	0.0244513	-0.053481	0.102384	0.538899	0.857221
480	LPE(20:4) [sn2]	0.0213937	-0.0584745	0.101262	0.599836	0.888754
481	LPE(22:6) [sn1]	-0.0270887	-0.109495	0.0553176	0.519715	0.852703
482	LPE(22:6) [sn2]	-0.00856212	-0.0933929	0.0762686	0.843271	0.966555
483	LPE(P-16:0)	0.0428968	-0.0524471	0.138241	0.378338	0.774834
484	LPE(P-18:0)	0.0261995	-0.0694913	0.12189	0.591786	0.886597
485	LPE(P-18:1)	0.0701051	-0.0251459	0.165356	0.149841	0.56641
486	LPE(P-20:0)	-0.018081	-0.111719	0.0755574	0.705265	0.928152
487	PI (38:5) (b)	-0.101712	-0.181576	-0.0218482	0.0129118	0.205746
488	PI(15-MHDA_20:4)\PI(17:0_20:4)	-0.0912152	-0.167632	-0.0147988	0.0197441	0.233489
489	PI(16:0_16:1)	-0.0348972	-0.124053	0.0542591	0.443382	0.811933
490	PI(16:0_20:3) (a)	-0.0667901	-0.144317	0.0107365	0.0919988	0.484967
491	PI(16:0_20:3) (b)	-0.0836148	-0.169424	0.00219409	0.0567865	0.403672
492	PI(16:0_20:4)	-0.0470016	-0.125401	0.0313974	0.240597	0.669407
493	PI(16:0/16:0)	-0.110529	-0.194936	-0.0261221	0.0105947	0.187883
494	PI(17:0_18:1)	-0.0734046	-0.161424	0.0146145	0.102843	0.495945
495	PI(17:0_18:2)	-0.101455	-0.182835	-0.0200748	0.0149309	0.214778
496	PI(18:0_18:1)	-0.0876946	-0.163983	-0.0114064	0.0247387	0.262803
497	PI(18:0_20:2)	-0.0725658	-0.152621	0.00748918	0.0763058	0.430247
498	PI(18:0_20:3) (a)	-0.0445659	-0.136364	0.0472323	0.341846	0.750219
499	PI(18:0_20:3) (b)	-0.0330658	-0.121687	0.0555552	0.464975	0.821269
500	PI(18:0_20:4)	-0.111813	-0.193543	-0.0300827	0.00760165	0.163602
501	PI(18:0_22:4)	-0.0978122	-0.180599	-0.0150255	0.0210236	0.233489
502	PI(18:0_22:5) (n3)	-0.149737	-0.239385	-0.0600888	0.00114357	0.0804973
503	PI(18:0_22:5) (n6)	-0.0766903	-0.166519	0.0131382	0.0949597	0.486301
504	PI(18:0_22:6)	-0.127968	-0.214906	-0.0410301	0.00410279	0.149122
505	PI(18:1_18:2)	-0.0215638	-0.107845	0.0647176	0.624479	0.904722
506	PI(20:0_20:4)	0.0338369	-0.0549248	0.122599	0.455351	0.816069
507	PI(34:0)	-0.182474	-0.266126	-0.0988227	2.33232e-05	0.0170959
508	PI(34:1)	-0.0880148	-0.16703	-0.00899967	0.0295364	0.29257
509	PI(36:2)	-0.105669	-0.191858	-0.0194807	0.0166665	0.222118
510	PI(37:6)	-0.12442	-0.211196	-0.0376432	0.00516734	0.149122
511	PI(38:5) (a)	-0.0688908	-0.150153	0.0123716	0.0972915	0.486301
512	PI(38:6)	-0.0662765	-0.150141	0.0175875	0.122098	0.55724
513	PI(39:6)	-0.10412	-0.188971	-0.0192699	0.0165716	0.222118
514	PIP1(38:4)	-0.00421663	-0.0987464	0.0903131	0.93037	0.991033
515	LPI(18:0) [sn1]	0.00821703	-0.0858484	0.102282	0.864132	0.973763
516	LPI(18:0) [sn2]	0.0144025	-0.077328	0.106133	0.758426	0.945915
517	LPI(18:1) [sn1]	0.00490962	-0.0786955	0.0885148	0.908418	0.984816
518	LPI(18:1) [sn2]	-0.0355681	-0.123932	0.0527962	0.430568	0.810398
519	LPI(18:2) [sn1]	0.0134157	-0.0750363	0.101868	0.766392	0.945915
520	LPI(18:2) [sn2]	0.0270136	-0.0616564	0.115684	0.550728	0.866275
521	LPI(20:4) [sn1]	-0.00364685	-0.090378	0.0830843	0.934355	0.991033
522	LPI(20:4) [sn2]	-0.000204786	-0.0871591	0.0867496	0.996319	0.996456
523	PS(36:1)	0.0300682	-0.0647918	0.124928	0.534738	0.857221
524	PS(36:2)	0.0270612	-0.0669355	0.121058	0.57285	0.87365
525	PS(38:3)	0.0174129	-0.0779802	0.112806	0.72068	0.934849
526	PS(38:4)	0.0146812	-0.079899	0.109261	0.761086	0.945915
527	PS(38:5)	-0.00136041	-0.0966886	0.0939678	0.977698	0.996456
528	PS(40:5)	0.00613916	-0.0884328	0.100711	0.898812	0.981862
529	PS(40:6)	-0.0103792	-0.104714	0.0839553	0.829358	0.965996
530	PG(34:1)	-0.0930524	-0.160466	-0.025639	0.00708162	0.160608
531	PG(36:1)	-0.0315283	-0.0975885	0.0345319	0.350065	0.753851
532	PG(36:2)	0.0171201	-0.0557786	0.0900187	0.645523	0.912994
533	CE(14:0)	-0.0203724	-0.103472	0.0627272	0.631102	0.907054
534	CE(15:0)	-0.0779299	-0.150862	-0.00499756	0.036794	0.332963
535	CE(16:0)	-0.11169	-0.192817	-0.0305632	0.00723066	0.160608
536	CE(16:1)	0.0139868	-0.0707072	0.0986808	0.746329	0.945915
537	CE(16:2)	0.00338628	-0.0587273	0.0654998	0.914952	0.984816
538	CE(17:0)	-0.0616058	-0.13968	0.0164686	0.122674	0.55724
539	CE(17:1)	-0.0724491	-0.148494	0.00359539	0.0625082	0.409377
540	CE(18:0)	-0.0304715	-0.106285	0.0453416	0.431241	0.810398
541	CE(18:1)	-0.0248628	-0.103503	0.0537773	0.535788	0.857221
542	CE(18:2)	-0.0537019	-0.135482	0.0280787	0.198742	0.630639
543	CE(18:3)	0.00476206	-0.0650567	0.0745808	0.893713	0.977821
544	CE(20:0)	-0.0281092	-0.113944	0.0577254	0.521291	0.852703
545	CE(20:1)	0.0165648	-0.0675449	0.100674	0.699674	0.927416
546	CE(20:2)	0.0531195	-0.026908	0.133147	0.193934	0.625517
547	CE(20:3)	0.0446457	-0.0333495	0.122641	0.262491	0.678632
548	CE(20:4)	0.0112942	-0.0403086	0.062897	0.668143	0.919804
549	CE(20:5)	-0.0180981	-0.0763957	0.0401994	0.543184	0.861805
550	CE(22:0)	0.0169055	-0.06827	0.102081	0.697448	0.927416
551	CE(22:1)	-0.0252871	-0.111134	0.0605599	0.564001	0.871074
552	CE(22:4)	-0.0196575	-0.0925701	0.0532551	0.597467	0.888323
553	CE(22:5) (n3)	-0.0259627	-0.0890285	0.037103	0.42016	0.804117
554	CE(22:5) (n6)	-0.00653927	-0.0743066	0.061228	0.850075	0.969045
555	CE(22:6)	-0.0264947	-0.0939952	0.0410057	0.442107	0.811933
556	CE(24:0)	-0.00590053	-0.0924652	0.0806641	0.893779	0.977821
557	CE(24:1)	0.0131943	-0.0736865	0.100075	0.766101	0.945915
558	CE(24:4)	0.0416803	-0.0468025	0.130163	0.356365	0.754957
559	CE(24:5)	-0.0156031	-0.101009	0.0698024	0.720452	0.934849
560	CE(24:6)	0.0717536	-0.0124551	0.155962	0.0955977	0.486301
561	COH	-0.031068	-0.106234	0.0440984	0.418305	0.803457
562	DE(16:0)	-0.00836978	-0.0932805	0.0765409	0.84689	0.96844
563	DE(18:1)	-0.0456489	-0.127514	0.0362158	0.275015	0.686028
564	DE(18:2)	-0.0423883	-0.107471	0.0226945	0.202424	0.630856
565	DE(20:4)	0.0198977	-0.0297203	0.0695158	0.432286	0.810398
566	DE(20:5)	0.0148344	-0.056986	0.0866548	0.685792	0.927416
567	DE(22:6)	-0.0532619	-0.122219	0.0156948	0.130757	0.55724
568	FA(14:0)	-0.148639	-0.239674	-0.0576046	0.0014707	0.0829247
569	FA(15:0)	-0.123836	-0.217519	-0.0301542	0.00988538	0.187883
570	FA(16:0)	-0.157461	-0.24789	-0.0670323	0.000701148	0.0583279
571	FA(16:1)	-0.152185	-0.244107	-0.0602636	0.0012626	0.0804973
572	FA(16:2)	-0.00579265	-0.099898	0.0883127	0.904024	0.984621
573	FA(17:0)	-0.164419	-0.255965	-0.0728726	0.00047536	0.0580732
574	FA(17:1)	-0.163864	-0.256402	-0.0713255	0.000569391	0.0583279
575	FA(18:0)	-0.0918059	-0.184544	0.000932584	0.0529715	0.384437
576	FA(18:1)	-0.133248	-0.223336	-0.0431603	0.00392717	0.149122
577	FA(18:2)	-0.103978	-0.193861	-0.014095	0.0238441	0.257026
578	FA(18:3)	-0.0831483	-0.173291	0.00699422	0.0712891	0.41939
579	FA(20:2)	-0.138105	-0.231419	-0.0447913	0.00390519	0.149122
580	FA(20:3)	-0.114178	-0.208243	-0.0201126	0.017774	0.227243
581	FA(20:4)	-0.0946911	-0.189998	0.000615905	0.0521191	0.382684
582	FA(20:5)	-0.13006	-0.223361	-0.0367582	0.00654024	0.154645
583	FA(22:4)	-0.13154	-0.223917	-0.0391642	0.00547953	0.149122
584	FA(22:5)	-0.170427	-0.261859	-0.0789953	0.000289404	0.0530333
585	FA(22:6)	-0.173024	-0.264107	-0.0819402	0.000221746	0.0530333
586	AC(12:0)	-0.125118	-0.214505	-0.0357297	0.00632383	0.154645
587	AC(13:0)	0.00435815	-0.0882436	0.0969599	0.926545	0.991033
588	AC(14:0)	-0.0733556	-0.164943	0.0182319	0.11716	0.545994
589	AC(14:1)	-0.113087	-0.202436	-0.0237385	0.0134771	0.210186
590	AC(14:2)	-0.0903177	-0.178651	-0.00198467	0.0456676	0.360929
591	AC(15:0) (a)	0.0301968	-0.0610237	0.121417	0.516787	0.852703
592	AC(15:0) (b)	-0.0489826	-0.140835	0.0428701	0.296487	0.705601
593	AC(16:0)	-0.0449534	-0.13916	0.0492532	0.350153	0.753851
594	AC(16:1)	-0.0523196	-0.145359	0.0407194	0.270972	0.682551
595	AC(17:0) (a)	-0.0663944	-0.158575	0.0257859	0.158726	0.58037
596	AC(17:0) (b)	-0.0363479	-0.129828	0.0571323	0.446397	0.811933
597	AC(18:0)	-0.0361632	-0.130661	0.0583348	0.453608	0.814938
598	AC(18:1)	0.0124912	-0.0826631	0.107646	0.797068	0.95004
599	AC(18:2)	0.0392781	-0.0552074	0.133764	0.41563	0.803457
600	DG(14:0_16:0)	-0.0239571	-0.0993538	0.0514397	0.533743	0.857221
601	DG(14:0_18:2)	0.00563124	-0.0596365	0.070899	0.865789	0.973763
602	DG(16:0_16:0)	-0.0241257	-0.0977866	0.0495352	0.521236	0.852703
603	DG(16:0_16:1)	-0.0106272	-0.0885624	0.0673079	0.789388	0.94881
604	DG(16:0_18:1)	0.0025215	-0.0613957	0.0664387	0.938403	0.991033
605	DG(16:0_18:2)	0.0194287	-0.0460627	0.0849201	0.561226	0.871074
606	DG(16:0_20:4)	-0.00988026	-0.0835859	0.0638253	0.792873	0.949634
607	DG(16:0_22:5)	-0.0342067	-0.105834	0.0374202	0.34976	0.753851
608	DG(16:0_22:6)	-0.0576759	-0.136053	0.0207008	0.149909	0.56641
609	DG(16:1_18:1)	0.00115096	-0.0632311	0.065533	0.972064	0.995322
610	DG(18:0_18:1)	0.0418254	-0.027442	0.111093	0.237239	0.669407
611	DG(18:0_18:2)	0.0501904	-0.0222277	0.122609	0.175019	0.591192
612	DG(18:0_20:4)	0.0654556	-0.025799	0.15671	0.160453	0.58037
613	DG(18:0_22:6)	-0.0365421	-0.131889	0.0588049	0.45294	0.814938
614	DG(18:1_18:1)	0.0450672	-0.0195794	0.109714	0.172506	0.591192
615	DG(18:1_18:2)	0.0526067	-0.0166483	0.121862	0.137235	0.56091
616	DG(18:1_18:3)	0.0728654	1.55238e-05	0.145715	0.0505663	0.382114
617	DG(18:1_20:3)	0.0291074	-0.0530348	0.11125	0.487708	0.835745
618	DG(18:1_20:4)	0.0768922	-0.00236489	0.156149	0.0578756	0.403672
619	DG(18:1_20:5)	0.0344773	-0.0460921	0.115047	0.402071	0.79076
620	DG(18:1_22:5)	0.0211305	-0.0580185	0.100279	0.60105	0.888754
621	DG(18:1_22:6)	0.00248607	-0.0810539	0.086026	0.953514	0.992792
622	DG(18:2_18:2)	0.0140645	-0.0666749	0.0948039	0.732944	0.939245
623	DG(18:2_20:4)	0.0646324	-0.0205637	0.149829	0.13774	0.56091
624	DG(18:2_22:6)	0.00826903	-0.0779738	0.0945119	0.85102	0.969045
625	TG(48:0) [NL-16:0]	-0.0496899	-0.132787	0.0334068	0.241806	0.669407
626	TG(48:0) [NL-18:0]	-0.017078	-0.10339	0.0692345	0.698341	0.927416
627	TG(48:1) [NL-16:1]	-0.0477434	-0.129469	0.0339823	0.252814	0.669407
628	TG(48:1) [NL-18:1]	-0.0148931	-0.08653	0.0567438	0.683852	0.927416
629	TG(48:2) [NL-14:0]	-0.000383147	-0.0643995	0.0636332	0.990646	0.996456
630	TG(48:2) [NL-14:1]	-0.0362214	-0.101979	0.0295364	0.280889	0.686304
631	TG(48:2) [NL-16:1]	-0.0510275	-0.127278	0.025223	0.190311	0.618062
632	TG(48:2) [NL-18:2]	-0.0108882	-0.0796665	0.05789	0.756488	0.945915
633	TG(48:3) [NL-14:0]	0.00083786	-0.0608757	0.0625514	0.978783	0.996456
634	TG(48:3) [NL-16:1]	-0.0221471	-0.0894705	0.0451764	0.519405	0.852703
635	TG(48:3) [NL-18:3]	0.00375807	-0.0646819	0.0721981	0.914342	0.984816
636	TG(49:1) [NL-16:1]	-0.0817759	-0.170503	0.00695115	0.0715194	0.41939
637	TG(49:1) [NL-17:1]	-0.0901868	-0.171871	-0.00850226	0.0309914	0.295022
638	TG(50:0) [NL-18:0]	-0.027445	-0.103666	0.0487762	0.480717	0.833853
639	TG(50:1) [NL-14:0]	-0.0103536	-0.0907282	0.0700209	0.800785	0.951338
640	TG(50:1) [NL-16:0]	-0.0492931	-0.123719	0.0251326	0.194909	0.625517
641	TG(50:1) [NL-18:1]	-0.033795	-0.109056	0.0414657	0.379268	0.774834
642	TG(50:2) [NL-14:0]	0.0113701	-0.056461	0.0792011	0.742656	0.945081
643	TG(50:2) [NL-16:1]	-0.0184013	-0.0970731	0.0602706	0.646857	0.912994
644	TG(50:2) [NL-18:1]	0.0190032	-0.0489758	0.0869822	0.584028	0.880849
645	TG(50:2) [NL-18:2]	-0.0255684	-0.103838	0.0527017	0.522324	0.852703
646	TG(50:3) [NL-14:0]	0.0359498	-0.0262031	0.0981027	0.257534	0.669407
647	TG(50:3) [NL-14:1]	0.0138426	-0.0489103	0.0765954	0.665693	0.919804
648	TG(50:3) [NL-16:1]	-0.0055734	-0.0743037	0.0631569	0.873789	0.975689
649	TG(50:3) [NL-18:2]	0.0195216	-0.0382281	0.0772712	0.507957	0.844291
650	TG(50:3) [NL-18:3]	-0.0163428	-0.0840706	0.0513851	0.63648	0.910649
651	TG(50:4) [NL-14:0]	0.0348659	-0.0286323	0.0983642	0.282414	0.68774
652	TG(50:4) [NL-18:3]	0.0263845	-0.0331217	0.0858907	0.385288	0.7753
653	TG(50:4) [NL-20:4]	-0.00641484	-0.0780662	0.0652365	0.860785	0.973763
654	TG(51:0) [NL-16:0]	-0.0414251	-0.11656	0.03371	0.280444	0.686304
655	TG(51:1) [NL-17:0]	-0.0434075	-0.112763	0.0259475	0.220575	0.655923
656	TG(51:2) [NL-15:0]	-0.00602337	-0.0747374	0.0626907	0.863664	0.973763
657	TG(51:2) [NL-17:0]	-0.0414277	-0.11034	0.0274842	0.239306	0.669407
658	TG(51:2) [NL-17:1]	-0.0414884	-0.11038	0.0274027	0.238478	0.669407
659	TG(52:1) [NL-18:0]	0.0278669	-0.0360142	0.0917479	0.393001	0.780482
660	TG(52:1) [NL-18:1]	0.0185012	-0.0447382	0.0817407	0.566652	0.871074
661	TG(52:2) [NL-16:0]	0.0317875	-0.0467043	0.110279	0.427756	0.810194
662	TG(52:2) [NL-18:2]	-0.00142988	-0.0759137	0.073054	0.970002	0.995322
663	TG(52:3) [NL-16:1]	0.0306346	-0.050399	0.111668	0.459097	0.818779
664	TG(52:3) [NL-18:2]	0.0308454	-0.0474086	0.109099	0.440182	0.811933
665	TG(52:4) [NL-16:1]	0.0648502	-0.00377861	0.133479	0.0646713	0.414906
666	TG(52:4) [NL-18:2]	0.0234729	-0.0534668	0.100413	0.550169	0.866275
667	TG(52:4) [NL-18:3]	0.0360298	-0.0298646	0.101924	0.284436	0.690369
668	TG(52:5) [NL-18:3]	0.039343	-0.0271515	0.105838	0.246797	0.669407
669	TG(52:5) [NL-20:4]	0.0487023	-0.0217763	0.119181	0.17629	0.592755
670	TG(52:5) [NL-20:5]	-0.047529	-0.122886	0.0278281	0.21703	0.649319
671	TG(53:2) [NL-17:1]	-0.0225817	-0.0893142	0.0441508	0.507513	0.844291
672	TG(53:2) [NL-18:1]	-0.00392194	-0.0658049	0.0579611	0.901198	0.983003
673	TG(54:0) [NL-18:0]	0.0807124	0.00281825	0.158607	0.0428537	0.34902
674	TG(54:1) [NL-18:1]	0.0667193	-0.00267706	0.136116	0.0601594	0.408304
675	TG(54:2) [NL-18:0]	0.0783395	0.0132271	0.143452	0.0187946	0.229607
676	TG(54:2) [NL-20:1]	0.0210981	-0.0388592	0.0810553	0.490743	0.835745
677	TG(54:3) [NL-18:1]	0.0772673	-0.0062096	0.160744	0.0703155	0.41939
678	TG(54:3) [NL-18:2]	0.0866322	0.0151303	0.158134	0.017981	0.227243
679	TG(54:4) [NL-18:2]	0.0488195	-0.0343702	0.132009	0.250668	0.669407
680	TG(54:4) [NL-20:3]	0.0140769	-0.0677704	0.0959242	0.736199	0.939921
681	TG(54:5) [NL-18:3]	0.0999855	0.0216982	0.178273	0.0126613	0.205746
682	TG(54:5) [NL-20:4]	0.0803733	-0.00620169	0.166948	0.0694875	0.41939
683	TG(54:6) [NL-18:3]	0.0874927	0.00954258	0.165443	0.028321	0.288323
684	TG(54:6) [NL-20:4]	0.0647205	-0.0197751	0.149216	0.133986	0.56091
685	TG(54:6) [NL-20:5]	0.0132374	-0.0675665	0.0940412	0.748293	0.945915
686	TG(54:6) [NL-22:6]	-0.0793958	-0.161893	0.00310136	0.0598988	0.408304
687	TG(54:7) [NL-20:5]	0.0336873	-0.0413916	0.108766	0.379636	0.774834
688	TG(54:7) [NL-22:6]	-0.0352957	-0.109494	0.0389021	0.351649	0.753851
689	TG(56:6) [NL-20:4]	0.122973	0.029794	0.216151	0.0100038	0.187883
690	TG(56:6) [NL-22:5](a)	0.0217298	-0.0651976	0.108657	0.624407	0.904722
691	TG(56:6) [NL-22:5](b)	0.0227369	-0.0639708	0.109445	0.607533	0.892429
692	TG(56:7) [NL-20:4]	0.132709	0.0421587	0.223258	0.00426511	0.149122
693	TG(56:7) [NL-20:5]	0.0660561	-0.0234035	0.155516	0.148528	0.56641
694	TG(56:7) [NL-22:5](a)	0.0427965	-0.0423935	0.127986	0.325334	0.733326
695	TG(56:7) [NL-22:5](b)	0.0427384	-0.0424188	0.127896	0.325805	0.733326
696	TG(56:7) [NL-22:6]	-0.0306007	-0.116578	0.0553767	0.485792	0.835745
697	TG(56:8) [NL-20:4]	0.102471	0.0158245	0.189118	0.0209011	0.233489
698	TG(56:8) [NL-20:5]	0.0550341	-0.0283143	0.138382	0.196274	0.625517
699	TG(56:8) [NL-22:6]	0.0169661	-0.0664071	0.100339	0.690192	0.927416
700	TG(56:9) [NL-22:6]	0.032748	-0.0501182	0.115614	0.439	0.811933
701	TG(58:10) [NL-22:6]	0.0553616	-0.0308334	0.141557	0.208731	0.640167
702	TG(58:8) [NL-22:6]	0.0435526	-0.0439672	0.131072	0.32991	0.739522
703	TG(58:9) [NL-22:6]	0.0500292	-0.0362668	0.136325	0.256443	0.669407
704	TG(O-50:1) [NL-15:0]	-0.0691164	-0.155536	0.0173035	0.11769	0.545994
705	TG(O-50:1) [NL-16:0]	-0.112297	-0.196006	-0.028589	0.00884778	0.180151
706	TG(O-50:1) [NL-17:1]	-0.115388	-0.197874	-0.0329025	0.00635462	0.154645
707	TG(O-50:1) [NL-18:1]	-0.0681046	-0.154878	0.0186691	0.124678	0.55724
708	TG(O-50:2) [NL-16:1]	-0.0577828	-0.150216	0.0346505	0.221123	0.655923
709	TG(O-50:2) [NL-18:1]	-0.0434794	-0.135398	0.0484398	0.354366	0.754957
710	TG(O-50:2) [NL-18:2]	-0.0685203	-0.161303	0.0242623	0.148466	0.56641
711	TG(O-50:3) [NL-18:2]	-0.0862766	-0.179762	0.00720843	0.0711417	0.41939
712	TG(O-52:0) [NL-16:0]	-0.0653521	-0.14648	0.0157761	0.115074	0.540699
713	TG(O-52:1) [NL-16:0]	-0.0778781	-0.158312	0.0025558	0.0583755	0.403672
714	TG(O-52:1) [NL-18:1]	-0.066124	-0.148069	0.0158212	0.114451	0.540699
715	TG(O-52:2) [NL-16:0]	-0.0325162	-0.117416	0.0523839	0.453247	0.814938
716	TG(O-52:2) [NL-17:1]	-0.0581789	-0.14132	0.0249618	0.170894	0.591192
717	TG(O-52:2) [NL-18:1]	-0.0467648	-0.135143	0.0416133	0.300238	0.708554
718	TG(O-54:2) [NL-17:1]	-0.0393081	-0.128117	0.0495013	0.386122	0.7753
719	TG(O-54:2) [NL-18:1]	-0.0511197	-0.13821	0.0359701	0.250562	0.669407
720	TG(O-54:3) [NL-17:1]	-0.00919312	-0.0983802	0.0799939	0.839984	0.966555
721	TG(O-54:3) [NL-18:1]	-0.0173158	-0.106402	0.0717705	0.703408	0.928152
722	TG(O-54:4) [NL-17:1]	0.0410989	-0.0418608	0.124058	0.332072	0.739642
723	TG(O-54:4) [NL-18:2]	0.00539923	-0.0876497	0.0984482	0.909503	0.984816
724	Ubiquinone	-0.00509705	-0.0964402	0.0862462	0.912958	0.984816
725	CE(18:2) [+OH]	0.0137124	-0.0737163	0.101141	0.758676	0.945915
726	CE(20:4) [+OH]	0.0354121	-0.050248	0.121072	0.418216	0.803457
727	CE(22:6) [+OH]	-0.0353796	-0.118304	0.0475449	0.403471	0.79076
728	LPC(18:2) [+OH]	0.0897674	-0.00284891	0.182384	0.0581131	0.403672
729	LPC(20:4) [+OH]	0.0570386	-0.0384334	0.152511	0.24223	0.669407
730	LPC(22:6) [+OH]	0.0484939	-0.0468328	0.143821	0.319266	0.730818
731	PC(34:2) [+OH]	0.0749776	-0.0072715	0.157227	0.0746588	0.425105
732	PC(36:4) [+OH]	0.0208502	-0.0612741	0.102974	0.618999	0.903837
733	PC(38:6) [+OH]	-0.0475355	-0.131361	0.0362899	0.266961	0.678632

## Sheet: Supp 7
Supp 7. Linear regression between maternal 28-week lipidome and infant 06m lipidome
#	Lipid	Beta	LCI	UCI	p value	BH p value
1	Sph(d16:1)	0.141364	0.060924	0.221804	0.000618748	0.00105926
2	Sph(d18:1)	0.062631	-0.0214968	0.146759	0.145127	0.156011
3	Sph(d18:2)	0.154293	0.0700628	0.238524	0.000361813	0.00066621
4	S1P(d16:1)	0.0913755	0.0121041	0.170647	0.0242826	0.0295842
5	S1P(d18:0)	0.0216958	-0.0659951	0.109387	0.627933	0.635761
6	S1P(d18:1)	0.103509	0.0178234	0.189195	0.0182671	0.0229043
7	S1P(d18:2)	0.112118	0.0229128	0.201323	0.0140865	0.0180653
8	Cer(d18:0/16:0)	0.0645448	-0.0203543	0.149444	0.13681	0.147723
9	Cer(d18:0/18:0)	0.0690655	0.00221701	0.135914	0.0433815	0.0512308
10	Cer(d18:0/20:0)	0.0854965	0.0144832	0.15651	0.018659	0.0233557
11	Cer(d18:0/22:0)	0.0824671	-0.00323714	0.168171	0.0598606	0.069019
12	Cer(d18:0/24:0)	0.084043	-0.00107701	0.169163	0.0535118	0.062186
13	Cer(d18:0/24:1)	0.0914922	0.0264827	0.156502	0.00601397	0.00837004
14	Cer(d16:1/16:0)	0.0775257	0.00581317	0.149238	0.0345776	0.0415727
15	Cer(d16:1/18:0)	0.152545	0.0655108	0.23958	0.000639608	0.00108733
16	Cer(d16:1/20:0)	0.214628	0.134955	0.2943	1.90732e-07	8.20146e-07
17	Cer(d16:1/22:0)	0.146234	0.0793354	0.213132	2.18652e-05	5.60713e-05
18	Cer(d16:1/23:0)	0.0785042	0.0104386	0.14657	0.0242006	0.0295337
19	Cer(d16:1/24:0)	0.119985	0.052796	0.187174	0.000505287	0.000883648
20	Cer(d16:1/24:1)	0.184841	0.104783	0.264899	7.49273e-06	2.14792e-05
21	Cer(d17:1/16:0)	0.216165	0.131551	0.300778	7.59067e-07	2.80241e-06
22	Cer(d17:1/18:0)	0.150201	0.0699138	0.230489	0.000271119	0.000522924
23	Cer(d17:1/20:0)	0.292946	0.20946	0.376433	1.76805e-11	2.66801e-10
24	Cer(d17:1/22:0)	0.271975	0.189139	0.35481	2.81852e-10	3.21928e-09
25	Cer(d17:1/23:0)	0.155148	0.0736813	0.236615	0.000210504	0.000415887
26	Cer(d17:1/24:0)	0.181868	0.0969153	0.266821	3.19864e-05	7.8201e-05
27	Cer(d17:1/24:1)	0.256189	0.174834	0.337545	1.36509e-09	1.23195e-08
28	Cer(d18:1/14:0)	0.0559487	-0.0314294	0.143327	0.210047	0.220927
29	Cer(d18:1/16:0)	0.124009	0.0449461	0.203071	0.00222211	0.00337004
30	Cer(d18:1/17:0)	0.450034	0.378605	0.521463	7.11367e-31	1.30002e-28
31	Cer(d18:1/18:0)	0.110137	0.0444257	0.175849	0.00108872	0.0017453
32	Cer(d18:1/19:0)	0.169603	0.0897909	0.249415	3.64855e-05	8.71298e-05
33	Cer(d18:1/20:0)	0.179388	0.104525	0.25425	3.39594e-06	1.08403e-05
34	Cer(d18:1/21:0)	0.180756	0.102241	0.259272	7.95066e-06	2.25269e-05
35	Cer(d18:1/22:0)	0.230979	0.14941	0.312549	4.57117e-08	2.4752e-07
36	Cer(d18:1/23:0)	0.13341	0.0561039	0.210717	0.000773014	0.00129604
37	Cer(d18:1/24:0)	0.180243	0.100438	0.260047	1.16822e-05	3.16284e-05
38	Cer(d18:1/24:1)	0.181988	0.111264	0.252712	6.34134e-07	2.37719e-06
39	Cer(d18:1/26:0)	0.376873	0.291587	0.46216	6.01802e-17	3.0648e-15
40	Cer(d18:2/14:0)	0.15478	0.0670341	0.242525	0.000590539	0.00101812
41	Cer(d18:2/16:0)	0.121509	0.0431228	0.199895	0.00250003	0.00372964
42	Cer(d18:2/17:0)	0.107144	0.0212031	0.193084	0.0148768	0.0190454
43	Cer(d18:2/18:0)	0.107619	0.0331298	0.182107	0.00481046	0.00676239
44	Cer(d18:2/20:0)	0.207048	0.126966	0.287129	5.62409e-07	2.15247e-06
45	Cer(d18:2/21:0)	0.175702	0.0941135	0.257291	2.87572e-05	7.14785e-05
46	Cer(d18:2/22:0)	0.256142	0.174955	0.33733	1.27443e-09	1.16451e-08
47	Cer(d18:2/23:0)	0.164531	0.0872325	0.241829	3.54424e-05	8.5225e-05
48	Cer(d18:2/24:0)	0.211563	0.134288	0.288838	1.21747e-07	5.70492e-07
49	Cer(d18:2/24:1)	0.215093	0.134766	0.29542	2.24608e-07	9.32891e-07
50	Cer(d18:2/26:0)	0.110888	0.0285823	0.193194	0.00852555	0.0114562
51	Cer(d19:1/16:0)	0.120772	0.051734	0.18981	0.000654908	0.00111076
52	Cer(d19:1/18:0)	0.109526	0.0529784	0.166074	0.000164334	0.00033369
53	Cer(d19:1/20:0)	0.160108	0.0982195	0.221997	5.53852e-07	2.13087e-06
54	Cer(d19:1/22:0)	0.133344	0.0754857	0.191203	7.77663e-06	2.21195e-05
55	Cer(d19:1/23:0)	0.170831	0.107034	0.234627	2.24529e-07	9.32891e-07
56	Cer(d19:1/24:0)	0.139837	0.0799265	0.199748	5.97572e-06	1.76139e-05
57	Cer(d19:1/24:1)	0.139536	0.0894498	0.189622	7.39413e-08	3.67694e-07
58	Cer(d19:1/26:0)	0.411745	0.33498	0.488509	1.48727e-23	1.55313e-21
59	Cer(d20:1/22:0)	0.12815	0.0555047	0.200795	0.000590139	0.00101812
60	Cer(d20:1/23:0)	0.179608	0.102998	0.256219	5.44377e-06	1.61764e-05
61	Cer(d20:1/24:0)	0.291468	0.214892	0.368043	3.68627e-13	9.29194e-12
62	Cer(d20:1/24:1)	0.161125	0.101642	0.220608	1.6393e-07	7.21884e-07
63	Cer(d20:1/26:0)	0.419142	0.336821	0.501462	1.45537e-21	1.18209e-19
64	Cer(m18:0/20:0)	0.130804	0.0580452	0.203563	0.000463473	0.000820336
65	Cer(m18:0/22:0)	0.0748993	-0.00971519	0.159514	0.0833453	0.0928741
66	Cer(m18:0/23:0)	0.120583	0.0389347	0.202232	0.00395666	0.00561616
67	Cer(m18:0/24:0)	0.11886	0.0340129	0.203706	0.0062486	0.00866741
68	Cer(m18:0/24:1)	0.133544	0.0554992	0.211589	0.000855699	0.0014025
69	Cer(m18:1/18:0)	0.0860521	0.0204824	0.151622	0.0103823	0.0138242
70	Cer(m18:1/20:0)	0.128929	0.0610309	0.196827	0.000219569	0.000432628
71	Cer(m18:1/22:0)	0.167513	0.0840343	0.250991	9.53395e-05	0.00020498
72	Cer(m18:1/23:0)	0.159379	0.0762397	0.242517	0.000191311	0.000382099
73	Cer(m18:1/24:0)	0.151225	0.0659934	0.236456	0.000548652	0.000950391
74	Cer(m18:1/24:1)	0.130704	0.0589945	0.202414	0.000386774	0.000703314
75	Cer1P(d18:1/16:0)	0.206536	0.116304	0.296768	8.94063e-06	2.48502e-05
76	HexCer(d16:1/18:0)	0.0630649	-0.0195568	0.145686	0.135249	0.146469
77	HexCer(d16:1/20:0)	0.183871	0.100317	0.267424	1.92828e-05	4.98082e-05
78	HexCer(d16:1/22:0)	0.166492	0.0881046	0.24488	3.68099e-05	8.73639e-05
79	HexCer(d16:1/24:0)	0.147803	0.0602235	0.235383	0.00100596	0.00161617
80	HexCer(d18:1/16:0)	0.0121428	-0.0691399	0.0934256	0.769789	0.774025
81	HexCer(d18:1/18:0)	0.114889	0.0522902	0.177487	0.000352555	0.000657132
82	HexCer(d18:1/20:0)	0.163521	0.0948196	0.232223	3.935e-06	1.20355e-05
83	HexCer(d18:1/22:0)	0.231848	0.145784	0.317911	1.90627e-07	8.20146e-07
84	HexCer(d18:1/24:0)	0.175721	0.0879559	0.263487	9.87846e-05	0.000209917
85	HexCer(d18:1/24:1)	0.164715	0.0866646	0.242765	4.11972e-05	9.71457e-05
86	HexCer(d18:2/18:0)	0.13232	0.0675126	0.197128	7.20701e-05	0.000158208
87	HexCer(d18:2/20:0)	0.151764	0.0785795	0.224948	5.56409e-05	0.000125149
88	HexCer(d18:2/22:0)	0.179625	0.0962006	0.26305	2.88456e-05	7.14785e-05
89	HexCer(d18:2/24:0)	0.157626	0.0717283	0.243523	0.000353287	0.000657132
90	Hex2Cer(d16:1/16:0)	0.200126	0.124497	0.275756	3.08437e-07	1.2526e-06
91	Hex2Cer(d16:1/24:1)	0.243737	0.166252	0.321222	1.41963e-09	1.26555e-08
92	Hex2Cer(d18:1/16:0)	0.155842	0.0746887	0.236994	0.000186517	0.000373544
93	Hex2Cer(d18:1/18:0)	0.273453	0.187942	0.358965	7.73796e-10	7.54193e-09
94	Hex2Cer(d18:1/20:0)	0.109078	0.0315593	0.186597	0.00602277	0.00837004
95	Hex2Cer(d18:1/22:0)	0.234105	0.14673	0.321481	2.21003e-07	9.28467e-07
96	Hex2Cer(d18:1/24:0)	0.281072	0.19291	0.369234	8.66693e-10	8.22796e-09
97	Hex2Cer(d18:1/24:1)	0.243448	0.157724	0.329172	4.19001e-08	2.3675e-07
98	Hex2Cer(d18:2/16:0)	0.149673	0.0689107	0.230436	0.000308894	0.000591104
99	Hex2Cer(d18:2/24:1)	0.189177	0.106622	0.271732	8.73891e-06	2.44756e-05
100	Hex3Cer(d18:1/16:0)	0.196008	0.115083	0.276932	2.67375e-06	8.72551e-06
101	Hex3Cer(d18:1/18:0)	0.0947628	0.017579	0.171947	0.0164611	0.0208907
102	Hex3Cer(d18:1/20:0)	0.137926	0.0615687	0.214284	0.00043569	0.000776804
103	Hex3Cer(d18:1/22:0)	0.237648	0.151264	0.324031	1.06175e-07	5.07281e-07
104	Hex3Cer(d18:1/24:0)	0.207151	0.121597	0.292705	2.69393e-06	8.75228e-06
105	Hex3Cer(d18:1/24:1)	0.175496	0.0909315	0.260061	5.49378e-05	0.000124333
106	GM3(d18:1/16:0)	0.183521	0.104708	0.262333	6.2794e-06	1.8361e-05
107	GM3(d18:1/18:0)	0.103863	0.0378505	0.169875	0.00215294	0.00328559
108	GM3(d18:1/20:0)	0.246507	0.178111	0.314903	5.26061e-12	9.15596e-11
109	GM3(d18:1/22:0)	0.141922	0.0644897	0.219355	0.000359037	0.000664172
110	GM3(d18:1/24:0)	0.122721	0.0395212	0.205921	0.00400166	0.00565806
111	GM3(d18:1/24:1)	0.0914214	0.0252109	0.157632	0.0070289	0.00962196
112	GM1(d18:1/16:0)	0.153496	0.0702936	0.236698	0.000328685	0.00062085
113	Sulfatide (d18:1:/16:0(OH))	0.173096	0.0843199	0.261872	0.000148748	0.000308031
114	Sulfatide (d18:1:/16:0)	0.337309	0.253868	0.42075	1.43432e-14	4.36869e-13
115	Sulfatide (d18:1:/24:0(OH))	0.276305	0.19114	0.36147	4.47876e-10	4.54719e-09
116	Sulfatide (d18:1:/24:0)	0.195415	0.108082	0.282747	1.4021e-05	3.70012e-05
117	Sulfatide (d18:1:/24:1(OH))	0.223673	0.142302	0.305044	1.08684e-07	5.15898e-07
118	Sulfatide (d18:1:/24:1)	0.204023	0.118442	0.289604	3.79984e-06	1.17698e-05
119	SM(34:3)	0.159363	0.0732173	0.24551	0.000316608	0.000602709
120	SM(35:2) (b)	0.128858	0.0661917	0.191524	6.41088e-05	0.000141582
121	SM(37:1)	0.230654	0.148698	0.312609	5.48728e-08	2.88576e-07
122	SM(37:2)	0.0979721	0.0400943	0.15585	0.00097139	0.00157099
123	SM(38:3) (a)	0.235242	0.159691	0.310792	2.04798e-09	1.76127e-08
124	SM(38:3) (b)	0.0645665	0.011454	0.117679	0.0175481	0.0221931
125	SM(40:3) (a)	0.228316	0.149554	0.307077	2.23152e-08	1.38294e-07
126	SM(40:3) (b)	0.146977	0.0978034	0.19615	8.33552e-09	6.21762e-08
127	SM(41:0)	0.204127	0.12589	0.282364	4.45744e-07	1.75182e-06
128	SM(41:1) (a)	0.180451	0.11227	0.248632	3.06921e-07	1.2526e-06
129	SM(43:1)	0.162253	0.0970227	0.227483	1.44883e-06	4.97229e-06
130	SM(43:2) (b)	0.0792544	0.0224293	0.13608	0.00647927	0.0089534
131	SM(43:2) (c)	0.221659	0.143485	0.299833	4.39267e-08	2.44407e-07
132	SM(44:1)	0.186118	0.10696	0.265275	5.11963e-06	1.52753e-05
133	SM(44:2)	0.144647	0.0776059	0.211688	2.77866e-05	6.93243e-05
134	SM(44:3)	0.194151	0.113864	0.274438	2.77209e-06	8.96638e-06
135	SM(d16:1/19:0)	0.0928923	0.0399043	0.14588	0.000637888	0.00108694
136	SM(d16:1/23:0)/SM(d17:1/22:0)	0.147931	0.0719508	0.223911	0.000152043	0.000313081
137	SM(d16:1/24:1)	0.205314	0.130176	0.280453	1.28583e-07	5.94902e-07
138	SM(d17:1/14:0)	0.179752	0.0940144	0.265489	4.61703e-05	0.000106134
139	SM(d17:1/16:0)	0.223251	0.142713	0.30379	8.54908e-08	4.16625e-07
140	SM(d17:1/24:1)	0.132651	0.063599	0.201702	0.000185537	0.000372603
141	SM(d18:0/14:0)	0.120767	0.0351006	0.206433	0.00593027	0.00827296
142	SM(d18:0/16:0)	0.153527	0.0806096	0.226443	4.28878e-05	0.000100484
143	SM(d18:0/22:0)	0.155657	0.0778838	0.23343	9.93714e-05	0.000210552
144	SM(d18:1/14:0/SM(d16:1/16:0)	0.13185	0.050526	0.213173	0.00157322	0.00245732
145	SM(d18:1/16:0)	0.128234	0.0604432	0.196025	0.000231925	0.000452099
146	SM(d18:1/17:0)/SM(d17:1/18:0)	0.122173	0.0695898	0.174757	6.5773e-06	1.91554e-05
147	SM(d18:1/18:0/SM(d16:1/20:0)	0.170384	0.101744	0.239023	1.52059e-06	5.14609e-06
148	SM(d18:1/20:0)/SM(d16:1/22:0)	0.222831	0.144212	0.30145	4.44681e-08	2.44407e-07
149	SM(d18:1/22:0)/SM(d16:1/24:0)	0.170229	0.0892147	0.251243	4.4426e-05	0.000103097
150	SM(d18:1/23:0)/SM(d17:1/24:0)	0.16867	0.0900149	0.247325	3.10338e-05	7.61265e-05
151	SM(d18:1/24:0)	0.14369	0.0597703	0.22761	0.000849148	0.00139489
152	SM(d18:1/24:1)	0.112043	0.0405925	0.183494	0.00222741	0.00337108
153	SM(d18:2/14:0)	0.112785	0.0265842	0.198987	0.0106156	0.014088
154	SM(d18:2/16:0)	0.0900861	0.0143313	0.165841	0.0201487	0.0250063
155	SM(d18:2/17:0)	0.0746058	0.0167546	0.132457	0.0117805	0.0154605
156	SM(d18:2/18:0)	0.0560052	-0.00278263	0.114793	0.0624367	0.0713145
157	SM(d18:2/18:1)	0.0668061	0.00240948	0.131203	0.0425298	0.0503178
158	SM(d18:2/20:0)	0.0966022	0.0316367	0.161568	0.00371758	0.005339
159	SM(d18:2/22:0)	0.13185	0.0495985	0.214102	0.00177494	0.00274308
160	SM(d18:2/23:0)	0.185935	0.103146	0.268723	1.30444e-05	3.4801e-05
161	SM(d18:2/24:0)	0.155292	0.0712008	0.239383	0.000324201	0.000615561
162	SM(d19:1/24:1)	0.114689	0.0669346	0.162444	3.23112e-06	1.04051e-05
163	PA(34:1)	0.0224279	-0.0640683	0.108924	0.61152	0.620862
164	PA(36:1)	-0.0122129	-0.0992386	0.0748128	0.78338	0.786608
165	PA(36:2)	0.0230894	-0.0597833	0.105962	0.585246	0.595013
166	PA(36:3)	0.0127	-0.066906	0.092306	0.754643	0.75984
167	PA(36:4)	0.0435152	-0.0408253	0.127856	0.312368	0.322972
168	PA(40:6)	0.129791	0.0433032	0.21628	0.00341475	0.00496259
169	PC(14:0_16:0)	0.157039	0.0810602	0.233017	5.88227e-05	0.0001319
170	PC(14:0_20:4)	0.13493	0.0561827	0.213676	0.000841931	0.00139056
171	PC(14:0_22:6)	0.11819	0.0330164	0.203364	0.00675305	0.00930086
172	PC(15-MHDA_18:1)	0.0903063	0.0361338	0.144479	0.00115786	0.00184802
173	PC(15-MHDA_18:2)	0.201119	0.140345	0.261892	2.06421e-10	2.47367e-09
174	PC(15-MHDA_20:4)	0.0894009	0.03275	0.146052	0.00208817	0.00320012
175	PC(15-MHDA_22:6)	0.108673	0.0544614	0.162884	9.6898e-05	0.000207282
176	PC(15:0_20:3)	0.15579	0.0817102	0.229869	4.37776e-05	0.000101915
177	PC(15:0_20:4)	0.169014	0.106092	0.231937	2.06408e-07	8.77235e-07
178	PC(15:0_22:6)	0.158692	0.0899432	0.22744	7.52877e-06	2.14982e-05
179	PC(16:0_16:0)	0.149554	0.0839088	0.215199	9.82808e-06	2.69359e-05
180	PC(16:0_18:0)	0.102868	0.0393859	0.166349	0.00158228	0.0024662
181	PC(16:0_18:1)	0.125257	0.0455443	0.20497	0.00218141	0.00331519
182	PC(16:0_18:2)	0.293873	0.225509	0.362237	3.59647e-16	1.38369e-14
183	PC(16:0_18:3) (a)	0.204886	0.125053	0.284719	6.77354e-07	2.52625e-06
184	PC(16:0_18:3) (b)	0.125648	0.0452372	0.206059	0.00230837	0.00347922
185	PC(16:0_20:3) (a)	0.0182195	-0.0599368	0.0963757	0.64793	0.655099
186	PC(16:0_20:3) (b)	0.230806	0.158363	0.303248	8.88111e-10	8.3232e-09
187	PC(16:0_20:4)	0.268575	0.196384	0.340766	1.15724e-12	2.28633e-11
188	PC(16:0_20:5)	0.28347	0.215637	0.351303	2.05626e-15	6.8324e-14
189	PC(16:0_22:6)	0.194461	0.117373	0.271549	1.03529e-06	3.69168e-06
190	PC(16:1_18:2)	0.125361	0.0448459	0.205877	0.00239274	0.00358421
191	PC(16:1_20:4)	0.201664	0.121577	0.281751	1.08129e-06	3.81849e-06
192	PC(16:1_22:6)	0.146263	0.0644882	0.228037	0.000495123	0.00086795
193	PC(17:0_18:1)	0.117867	0.0571098	0.178624	0.000160468	0.000327659
194	PC(17:0_18:2)	0.3293	0.260933	0.397666	1.2701e-19	7.73705e-18
195	PC(17:0_20:4)	0.135022	0.0726295	0.197415	2.63111e-05	6.60941e-05
196	PC(17:0_22:6)	0.156024	0.0908383	0.22121	3.48125e-06	1.10164e-05
197	PC(17:1_18:2)	0.139535	0.0618333	0.217237	0.000470209	0.000828247
198	PC(18:0_18:1)	0.142463	0.0635139	0.221413	0.000441515	0.000783367
199	PC(18:0_18:2)	0.197531	0.125149	0.269914	1.33272e-07	6.12716e-07
200	PC(18:0_20:3)	0.0752137	-0.00331653	0.153744	0.0610513	0.0701706
201	PC(18:0_20:4)	0.240535	0.167795	0.313274	2.12746e-10	2.50834e-09
202	PC(18:0_22:4)	0.272698	0.196164	0.349233	8.89751e-12	1.41393e-10
203	PC(18:0_22:5) (n3)	0.15553	0.0958884	0.215172	4.51747e-07	1.76592e-06
204	PC(18:0_22:5) (n6)	0.291585	0.211335	0.371834	3.60022e-12	6.5794e-11
205	PC(18:0_22:6)	0.249908	0.179851	0.319965	8.44033e-12	1.37108e-10
206	PC(18:1_18:1)	0.161303	0.0819824	0.240623	7.69549e-05	0.000167923
207	PC(18:1_18:2)	0.091934	0.0227242	0.161144	0.00949226	0.0127318
208	PC(18:1_20:3)	0.13504	0.0538581	0.216221	0.00118634	0.00188935
209	PC(18:1_22:6) (a)	0.199099	0.112553	0.285645	8.069e-06	2.27739e-05
210	PC(18:1_22:6) (b)	0.133632	0.0718314	0.195432	2.67028e-05	6.68485e-05
211	PC(18:2_18:2)	0.0925698	0.0111201	0.174019	0.0263381	0.031982
212	PC(18:2_20:5)	0.238429	0.154964	0.321893	3.50726e-08	2.01874e-07
213	PC(20:0_20:4)	0.269371	0.186814	0.351928	3.59671e-10	4.04491e-09
214	PC(28:0)	0.105998	0.022784	0.189212	0.0128481	0.0166229
215	PC(31:0) (a)	0.157949	0.101287	0.214612	7.26944e-08	3.6648e-07
216	PC(31:0) (b)	0.153247	0.10076	0.205733	1.77966e-08	1.17079e-07
217	PC(32:1)	0.16099	0.0928095	0.229171	4.67601e-06	1.40665e-05
218	PC(32:2)	0.094823	0.0215612	0.168085	0.0114795	0.0151199
219	PC(33:0) (a)	0.108452	0.0602418	0.156662	1.2634e-05	3.38296e-05
220	PC(33:0) (b)	0.0986554	0.047752	0.149559	0.000162809	0.000331513
221	PC(33:1)	0.130081	0.0680232	0.192138	4.63262e-05	0.000106158
222	PC(33:2)	0.182923	0.10638	0.259466	3.60239e-06	1.13019e-05
223	PC(34:5)	0.224434	0.140901	0.307967	2.04941e-07	8.76092e-07
224	PC(35:5)	0.253725	0.190051	0.3174	3.2168e-14	9.04415e-13
225	PC(36:6) (a)	0.283561	0.208388	0.358734	5.82271e-13	1.35784e-11
226	PC(38:2)	0.139693	0.0579745	0.221412	0.000865717	0.00141564
227	PC(38:4) (b)	0.162862	0.0855253	0.240199	4.2753e-05	0.000100484
228	PC(38:5) (a)	0.252263	0.18206	0.322466	6.04125e-12	1.02701e-10
229	PC(38:5) (b)	0.213097	0.144324	0.281871	2.4351e-09	2.02279e-08
230	PC(38:6) (a)	0.191704	0.110918	0.27249	4.2014e-06	1.27437e-05
231	PC(38:7)(c)	0.113503	0.0472388	0.179767	0.00084529	0.00139168
232	PC(39:5)(a)	0.134125	0.0714178	0.196832	3.25006e-05	7.91931e-05
233	PC(39:5)(b)	0.159284	0.104223	0.214346	2.37965e-08	1.44961e-07
[truncated: 498 more rows]

## Sheet: Supp 8
Supp 8. Linear regression between maternal 28-week lipidome and infant 12m lipidome
[truncated: 732 more rows]

[truncated: 3 more sheets: Supp 9, Supp 10, Supp 11]
